# Supplementary material for: Large-scale cytological profiling for functional analysis of bioactive compounds
Source: Royal Society of Chemistry journal article supplement (doi:10.1039/c3mb70245f), 2013-08-20
Supplement: c3mb70245f.xlsx [file c3mb70245f.xlsx]

## Sheet: HD scores
Table S1
Sheet 1.	Cytological profiling data (as HD scores) for 399 compound-dose instances after eliminating instances due to weak phenotypes and toxicity.
Sheet 2.	List of cytological features as denoted by microscope software, feature definitions, and feature categories used in GSEA analysis.
Sheet 3.	Compounds and corresponding compound classes.
Compound_concentration (µM)	compound class	All_ACTIN_Mean_Cell_Aver_Intens_MultiWaveScoring_cyto	All_ACTIN_Mean_Cyto_Aver_Intens_MultiWaveScoring_cyto	All_ACTIN_Mean_Nucl_Integr_Intens_MultiWaveScoring_cyto	All_ACTIN_Mean_Stain_Area_MultiWaveScoring_cyto	All_ACTIN_Mean_Stain_Integr_Intens_MultiWaveScoring_cyto	All_Cells_Mean_Area_MultiWaveScoring_EdU	All_EdU_Mean_Cell_Aver_Intens_MultiWaveScoring_EdU	All_EdU_Mean_Cell_Integr_Intens_MultiWaveScoring_EdU	All_EdU_Mean_Nucl_Aver_Intens_MultiWaveScoring_EdU	All_EdU_Mean_Nucl_Integr_Intens_MultiWaveScoring_EdU	All_EdU_Mean_Stain_Area_MultiWaveScoring_EdU	All_EdU_Mean_Stain_Aver_Intens_MultiWaveScoring_EdU	All_EdU_Mean_Stain_Integr_Intens_MultiWaveScoring_EdU	All_Nuclei_Mean_Area_MultiWaveScoring_EdU	All_Nuclei_Mean_Area_MultiWaveScoring_cyto	All_Nuclei_Mean_Average_Itensity_MultiWaveScoring_EdU	All_Nuclei_Mean_Average_Itensity_MultiWaveScoring_cyto	All_Nuclei_Mean_Integr_Itensity_MultiWaveScoring_EdU	All_Nuclei_Mean_Integr_Itensity_MultiWaveScoring_cyto	All_PH3_Mean_Cell_Aver_Intens_MultiWaveScoring_EdU	All_PH3_Mean_Cell_Integr_Intens_MultiWaveScoring_EdU	All_PH3_Mean_Nucl_Aver_Intens_MultiWaveScoring_EdU	All_PH3_Mean_Nucl_Integr_Intens_MultiWaveScoring_EdU	All_PH3_Mean_Nucl_Integr_Intens_MultiWaveScoring_cyto	All_PH3_Mean_Stain_Area_MultiWaveScoring_EdU	All_PH3_Mean_Stain_Area_MultiWaveScoring_cyto	All_PH3_Mean_Stain_Aver_Intens_MultiWaveScoring_EdU	All_PH3_Mean_Stain_Aver_Intens_MultiWaveScoring_cyto	All_PH3_Mean_Stain_Integr_Intens_MultiWaveScoring_EdU	All_PH3_Mean_Stain_Integr_Intens_MultiWaveScoring_cyto	All_TUBULIN_Mean_Cell_Aver_Intens_MultiWaveScoring_cyto	All_TUBULIN_Mean_Cyto_Aver_Intens_MultiWaveScoring_cyto	All_TUBULIN_Mean_Nucl_Aver_Intens_MultiWaveScoring_cyto	All_TUBULIN_Mean_Nucl_Integr_Intens_MultiWaveScoring_cyto	All_TUBULIN_Mean_Stain_Aver_Intens_MultiWaveScoring_cyto	Area_IMA_Summary_EdU	Area_IMA_Summary_cyto	Average_intensity_IMA_Summary_EdU	Average_intensity_IMA_Summary_cyto	Binucleated_Cells_Micronuclei_EdU	Binucleated_Cells_Micronuclei_cyto	Breadth_IMA_Summary_EdU	Breadth_IMA_Summary_cyto	Cells_with_one_micronucleus_Micronuclei_EdU	Cellular_Gradient_Index_Transfluor_EdU	Cellular_Gradient_Index_Transfluor_cyto	Cellular_Laplacian_Index_Transfluor_EdU	Cellular_Texture_Index_Transfluor_EdU
1-Octadecyl-2-methylglycero-3 PC_0.03	bioactive lipid	0.218668	0.234744	0.133558	-0.0780449	-0.0432587	-0.0240192	0.342901	0.22826	0.342901	0.22826	-0.0370827	0.586254	0.162771	-0.0240192	-0.0799179	0.00772476	0.126286	0	0.0737076	-0.000829697	-0.001688	-0.000829697	-0.001688	-0.0210514	0.00157928	5.72205e-06	0.0210056	0.0802803	0.0294399	0.00185394	0.175768	0.174059	0.0641956	0.0220299	0.172043	-0.0429611	-0.0559139	0	0.184177	0.161146	-0.128925	0.0125122	-0.00764847	0.00841141	0.382521	0.058569	0.445107	0.387205
10-Hydroxycamptothecin_0.0165	Inhibits DNA synthesis	-0.182987	-0.201556	0.580081	0.148578	0.249344	0.546713	-0.502832	-0.469408	-0.502832	-0.469408	-0.135792	-0.535301	-0.51915	0.546713	0.518346	-0.315929	-0.110695	0.543953	0.515158	-0.248051	0.155121	-0.248051	0.155121	-0.0935593	-0.815498	-0.850401	0.187727	-0.198952	-0.815247	-0.777683	0.161583	0.133236	-0.243431	0.405966	0.0435602	0.541841	0.515305	-0.240574	-0.151491	-0.00444794	0.128076	0.652668	0.701485	-0.00346021	-0.535086	0.198584	-0.531982	-0.637594
10-Hydroxycamptothecin_0.08235	Inhibits DNA synthesis	-0.0544243	0.0549394	0.478458	0.188139	0.304939	0.644664	-0.483179	-0.342167	-0.483179	-0.342167	-0.298601	-0.471712	-0.407648	0.644664	0.671598	-0.211592	-0.214224	0.561916	0.384903	-0.521519	0.110079	-0.521519	0.110079	0.27398	-0.389927	-0.424866	-0.349264	-0.378156	-0.798077	-0.803926	0.0484524	0.220461	-0.0368919	0.623482	0.0843716	0.55838	0.677108	-0.228092	-0.215092	-0.0380854	0.076189	0.812992	0.868708	-0.00348751	-0.458942	0.219912	-0.458323	-0.741339
10-Hydroxycamptothecin_2.055	Inhibits DNA synthesis	0.210836	0.225557	0.361408	0.271032	0.323581	0.40234	-0.642715	-0.540497	-0.642715	-0.540497	-0.439827	-0.605183	-0.833063	0.40234	0.408569	-0.00775909	-0.112118	0.194492	0.0768681	-0.310368	-0.0308018	-0.310368	-0.0308018	0.0383449	-0.551361	0	0.123545	0.054306	-0.665668	-0.455202	0.746155	0.682678	0.727539	0.690002	0.746155	0.398823	0.433189	-0.01614	-0.0787163	-0.172329	0.142225	0.227373	0.308041	0.364357	-0.779415	0.380249	-0.735836	-0.259632
10-Hydroxycamptothecin_0.411	Inhibits DNA synthesis	0.24471	0.238726	0.306166	0.191448	0.274094	0.657686	-0.53797	-0.533924	-0.53797	-0.533924	-0.838352	-0.506176	-0.750553	0.657686	0.555016	0.00772476	-0.302433	0	0.0737076	-0.226904	0.0820103	-0.226904	0.0820103	0.127985	-0.329704	-0.0227108	-0.382456	-0.230671	-0.194479	-0.0121078	-0.0825062	-0.0915394	0.0641956	0.469906	-0.0851288	0.586418	0.558233	0	-0.278904	-0.355784	0.22646	0.575989	0.526325	0.14867	-0.544874	-0.0304928	-0.543251	-0.79199
13(S)-HPODE_0.003	bioactive lipid	-0.303717	0.285234	-0.12892	-0.249554	-0.220261	0.657686	-0.539923	-0.507557	-0.539923	-0.507557	0.429539	-0.510082	-0.457462	0.657686	-0.0967636	0.00772476	0.155338	0.25	-0.0297623	0.246435	0.603006	0.246435	0.603006	-0.0210514	0.674431	0.0241756	-0.310434	-0.0498848	0.676413	-0.0121078	-0.0825062	-0.0915394	-0.0705433	-0.081356	-0.0851288	0.608025	-0.0882626	0.25	-0.14658	-0.379099	0.127094	0.955872	-0.091877	-0.0547981	-0.543409	0.0669918	-0.541786	-0.542967
13-cis Retinoic acid_0.03	retinoid receptor ligand	-0.193178	-0.203494	-0.220716	-0.188396	-0.238327	0.6113	-0.52088	-0.0778694	-0.52088	-0.0778694	0.58884	-0.45393	-0.283878	0.6113	-0.156334	0.00772476	-0.132389	0.140625	-0.12986	-0.226904	0.387186	-0.226904	0.387186	-0.0210514	-0.329704	5.72205e-06	-0.575449	-0.0498848	-0.194479	-0.0121078	-0.139147	-0.140856	-0.0705433	-0.146542	-0.142258	0.598381	-0.122076	0	-0.141209	-0.358143	0.112568	0.955872	-0.107258	0.0231819	-0.471632	0.0669918	-0.472572	-0.472654
15-Ketoeicosatetraenoic acid_0.00012	bioactive lipid	0.229096	0.243897	0.216963	-0.22456	-0.053299	-0.072361	0.467432	0.423021	0.467432	0.423021	0.0316658	0.419823	0.353745	-0.072361	-0.0939484	0.0275993	0.173195	-0.0261307	0.0343227	3.8147e-06	-0.0706482	3.8147e-06	-0.0706482	-0.142143	0.0112991	-0.0651226	-0.0187817	-0.0175552	0.0209351	-0.101902	0.232233	0.233451	0.207647	-0.00911522	0.175178	-0.0727386	-0.0894012	0.0235329	0.110109	-0.00444794	-0.111409	-0.015583	-0.0853958	-0.00346021	0.352957	0.256672	0.344604	0.362692
16;16-Dimethyl-prostaglandin E2_0.006	prostaglandin	0.320723	0.321238	0.25629	-0.207819	-0.138069	-0.12676	0.409937	0.288103	0.409937	0.288103	0.0832691	0.430086	0.27866	-0.12676	-0.185921	0.0253124	0.116568	0.026516	-0.0523834	-0.0205421	-0.139132	-0.0205421	-0.139132	-0.240402	-0.00174332	-0.0147095	0.0102749	-0.0578737	-0.0129204	-0.155489	0.223501	0.261354	0.104275	-0.0239944	0.248434	-0.10379	-0.0687504	0.0205727	0.109501	-0.0380854	-0.0318775	-0.0688515	-0.0627995	-0.00348751	0.325886	0.257998	0.325754	0.498419
17-Allylamino-geldanamycin_0.010245	HSP-90 inhibitor	0.181731	0.157224	0.287642	0.201733	0.404007	0.0910378	-0.547266	-0.526049	-0.547266	-0.526049	-0.436329	-0.469627	-0.514755	0.0910378	0.0659943	0.673189	0.40053	0.87159	0.847433	0.250492	0.678436	0.250492	0.678436	0.460503	0.592517	0.539529	-0.581282	-0.506935	0.596497	0.319309	0.110143	0.0431626	0.295147	0.491537	0.0846447	0.122299	0.0947723	0.862644	0.434125	-0.00444794	-0.111409	0.17757	0.0663528	0.0365484	-0.444387	0.159644	-0.441528	-0.490622
17-Allylamino-geldanamycin_0.05115	HSP-90 inhibitor	0.119008	0.105307	0.362736	0.209894	0.406868	0.103323	-0.456812	-0.383427	-0.456812	-0.383427	-0.330462	-0.412874	-0.398859	0.103323	0.0750809	0.531904	0.315908	0.632961	0.442032	0.610142	0.576632	0.610142	0.576632	0.32784	0.678989	0.629944	-0.594015	-0.584773	0.607159	0.537569	0.176138	0.111208	0.398098	0.46833	0.199728	0.112579	0.0448246	0.536198	0.356571	-0.00429246	-0.00782967	0.069828	0.0638981	-0.00348751	-0.441364	0.200869	-0.439768	-0.432257
17-Allylamino-geldanamycin_0.2565	HSP-90 inhibitor	-0.186376	-0.191913	-0.12892	-0.184612	-0.11528	0.0536823	-0.539923	-0.533924	-0.539923	-0.533924	-0.538914	-0.468822	-0.501041	0.0536823	0.0938339	0.00772476	-0.0813637	0	0.0737076	0.246435	0.508036	0.246435	0.508036	0.161554	0.690056	0.83814	-0.490976	-0.587482	0.628805	0.546776	-0.139147	-0.0816517	-0.0705433	0.0647545	-0.0811005	0.0107346	0.0710506	0.25	0.113621	-0.358143	0.165546	0.0540161	0.0489082	0.0809212	-0.481642	0.0669918	-0.480019	-0.542967
17-Allylamino-geldanamycin_1.281	HSP-90 inhibitor	-0.164022	-0.168879	-0.128986	-0.18009	-0.102135	0.0897179	-0.642715	-0.556854	-0.642715	-0.556854	-0.454597	-0.611042	-0.592829	0.0897179	0.0482178	0.0608597	-0.112118	0.359165	-0.0238895	0.44611	0.490396	0.44611	0.490396	0.223149	0.567352	0.375	-0.0605564	-0.21666	0.474018	0.307009	-0.0161743	-6.10352e-05	-0.000976562	-0.0249634	-0.0161743	0.0954781	0.0962753	0.0520287	-0.0787163	-0.290859	0.321791	0.16939	0.0696373	0.139503	-0.779415	-0.161499	-0.735836	-0.259632
17-Octadecynoic acid_0.03	bioactive lipid	-0.353043	-0.33603	-0.12892	-0.188396	-0.147141	-0.0766315	0.458868	0.423627	0.458868	0.423627	0.379612	0.158642	0.284	-0.0766315	-0.0967636	-0.00137711	-0.102726	0	-0.0776138	-0.0104733	-0.00840187	-0.0104733	-0.00840187	-0.0210514	0.00157928	5.72205e-06	-0.0249119	-0.104816	0.000387192	-0.0121078	-0.0825062	-0.0915394	-0.0705433	-0.081356	-0.0851288	0.0153732	-0.0856991	0	-0.098362	0.11954	0.13686	0.0022583	-0.091877	-0.0547981	0.376037	0.0669918	0.374414	0.355955
17-Octadecynoic acid_0.15	bioactive lipid	-0.147111	0.15791	-0.0464668	-0.233068	-0.220517	-0.0784874	0.591934	0.860321	0.591934	0.860321	0.329109	0.608112	0.477594	-0.0784874	-0.090332	-0.00775909	-0.0457115	-0.082798	-0.0902958	-0.0359535	-0.118326	-0.0359535	-0.118326	-0.0598522	-0.058197	0	-0.0572605	0.0584564	-0.0612984	0.00891304	-6.10352e-05	-6.10352e-05	-0.000976562	-0.0249634	-6.10352e-05	-0.0769234	-0.0970078	-0.000514984	-0.0250053	0.153408	0.125013	-0.0249805	-0.0671959	-0.0105972	0.51379	0.0443115	0.51318	0.673695
2-APB_3.33	IP3 receptor blocker	0.0277731	0.00756113	-0.0138313	0.127045	0.0524448	-0.231446	-0.280021	-0.354792	-0.280021	-0.354792	-0.588716	-0.283834	-0.662657	-0.231446	-0.0214479	0.023941	0.0293947	-0.0970854	0.010357	-0.000248812	-0.00230875	-0.000248812	-0.00230875	0.0134321	-0.0626557	0.010146	0.0879457	0.0332687	0.022952	0.138742	0.0301729	0.00656875	0.105118	0.000359983	0.0348944	-0.209718	-0.0129475	0.0156745	0.0224536	-0.276623	-0.138712	-0.418391	-0.138745	-0.0514803	-0.436003	4.67106e-07	-0.412685	-0.110329
2-Arachidonoylglycerol_0.006	cannabinoid receptor ligand	0.339596	0.294768	0.268742	-0.168879	-0.110237	0.0554714	0.36294	0.27747	0.36294	0.27747	0.167742	0.334749	0.311457	0.0554714	-0.101448	0.0215282	0.0798244	0.0201683	-0.0523834	-0.0156593	0.0697956	-0.0156593	0.0697956	-0.148521	-0.00174332	-0.0147095	-0.0252895	-0.152727	-0.00510788	-0.155489	0.472959	0.41835	0.493679	0.0814896	0.479011	0.109161	-0.143091	-0.0213051	0.123905	-0.0380854	-0.0318775	-0.0222206	-0.123835	-0.00348751	0.242756	0.241396	0.24299	0.289557
25-Hydroxyvitamin D3_0.0012	Vitamin D receptor ligand	0.200297	0.206642	0.218428	-0.188671	-0.0946808	-0.158054	0.439478	0.353807	0.439478	0.353807	0.10088	0.361961	0.340317	-0.158054	-0.0766144	0.0554314	0.200172	-0.0727615	0.0709438	3.8147e-06	-0.0569763	3.8147e-06	-0.0569763	-0.0332565	-0.00153351	0.0386333	0.041975	-0.0121841	-0.00445557	-0.00766373	0.161583	0.0980952	0.122353	0.0357265	0.105509	-0.204819	-0.0740204	0.141453	0.200563	-0.00444794	-0.0466113	-0.0998116	-0.076973	-0.00346021	0.373953	0.216415	0.381592	0.405539
2;5-Ditertbutylhydroquinone_0.675	ER Ca++ ATPase inhibitor	0.0390502	0.0472467	-0.10831	-0.1444	-0.0502677	-0.498343	-0.354454	-0.527574	-0.354454	-0.527574	-0.368641	-0.126858	-0.483669	-0.498343	-0.181714	0.141379	0.177978	-0.0796077	-0.0380948	-0.0223182	-0.286504	-0.0223182	-0.286504	-0.166175	-0.0878377	-0.240789	-0.060367	0.0634535	-0.115751	-0.316667	0.021795	0.0535608	-3.11404e-05	-0.0828188	0.0466956	-0.489187	-0.205822	0.149433	0.212653	-0.369796	-0.309794	-0.264804	-0.12251	0.0613383	-0.518516	0.0181279	-0.521505	-0.477802
3;4-Dichloroisocoumarin_3.495	protease inhibitor	-0.445456	-0.424822	-0.239216	-0.1724	-0.216289	-0.496944	-0.571915	-0.553192	-0.571915	-0.553192	0.383186	-0.605183	-0.600641	-0.496944	-0.471313	0.721504	0.546078	0.359165	0.133875	0.236637	-0.0579014	0.236637	-0.0579014	0.0121194	0.4664	0.8125	-0.530039	-0.492416	0.36208	0.429323	-0.252014	-0.252014	-0.000976562	-0.305237	-0.252014	-0.484638	-0.446251	0.687527	0.593365	-0.679897	-0.66493	-0.376909	-0.433163	-0.0613785	-0.779415	-0.161499	-0.735836	-0.259632
3;4-Dichloroisocoumarin_0.6975	protease inhibitor	-0.392933	-0.409621	-0.0446911	0.0684013	-0.0226288	-0.641573	-0.536016	-0.530506	-0.536016	-0.530506	-0.511936	-0.506176	-0.500553	-0.641573	-0.279625	0.279697	0.320866	0	0.179543	-0.226904	-0.335917	-0.226904	-0.335917	-0.177423	0.0186691	-0.0227108	-0.528574	-0.442829	-0.194479	-0.0121078	-0.531725	-0.522692	-0.0705433	-0.227718	-0.531418	-0.626701	-0.276251	0.375	0.379734	-0.731765	-0.260517	-0.216614	-0.140461	-0.0547981	-0.544874	-0.108496	-0.543251	-0.79199
5(S)-HPETE_0.00012	bioactive lipid	0.239544	0.222757	0.218428	-0.282177	-0.115921	-0.072361	0.340601	0.266161	0.340601	0.266161	0.0282478	0.373192	0.207748	-0.072361	-0.0766144	0.0275993	0.177467	-0.0841141	0.0709438	3.8147e-06	-0.162445	3.8147e-06	-0.162445	-0.231987	-0.00153351	-0.0186138	-0.0439281	-0.116798	-0.00445557	-0.139988	0.228985	0.231	0.149375	-0.0757656	0.175178	-0.123154	-0.104904	-0.0467262	0.110109	-0.00444794	-0.111409	-0.015583	-0.0853958	-0.00346021	0.366873	0.265986	0.357788	0.429098
5-Iodotubercidin_0.0153	kinase inhibitor	0.181036	0.11952	0.458651	0.0598363	0.192996	0.162764	-0.399117	-0.283163	-0.399117	-0.283163	-0.0956251	-0.340356	-0.354427	0.162764	0.387697	0.491976	0.284456	0.484764	0.394962	0.536388	0.543701	0.536388	0.543701	0.439546	0.578314	0.639696	-0.307656	-0.320677	0.608172	0.361728	0.0958062	0.0549917	0.304737	0.535473	0.127642	0.141943	0.384388	0.477789	0.250213	-0.00281857	-0.0165227	0.104657	0.40119	-0.00230829	-0.332204	-0.0787453	-0.368528	-0.282581
5-Iodotubercidin_0.0765	kinase inhibitor	0.126651	0.16033	0.556045	0.213927	0.397953	0.562687	-0.541213	-0.5038	-0.541213	-0.5038	-0.599702	-0.482387	-0.764052	0.562687	0.522595	-0.0381535	-0.155641	0.63482	0.525253	-0.285526	0.111904	-0.285526	0.111904	0.189978	-0.133532	-0.30366	0.324467	0.298024	-0.457077	-0.51058	0.0691285	0.0667476	0.020214	0.459208	0.0521994	0.558208	0.441799	-0.0574095	-0.212842	0.366218	0.386547	0.734745	0.543902	0	-0.480561	0.332894	-0.480874	-0.727521
5-Iodotubercidin_1.92	kinase inhibitor	0.106754	0.0700786	0.483279	0.615257	0.361666	0.496862	-0.280021	-0.603955	-0.280021	-0.603955	-0.876384	-0.669297	-0.853679	0.496862	0.590156	0.264699	-0.109752	0.615047	0.595248	-0.252062	-0.00230875	-0.252062	-0.00230875	-0.000422886	-0.309656	-0.26182	-0.378613	-0.519841	-0.0239286	-0.0575479	0.00387542	0.0342613	-0.030899	0.168468	0.0051092	0.49906	0.586364	0.35231	-0.0531107	-0.365205	0.289305	0.406253	0.92697	-0.103715	-0.436003	4.67106e-07	-0.412685	-0.110329
5-Iodotubercidin_0.3825	kinase inhibitor	0.0857159	0.0778333	0.421507	0.377797	0.403679	0.578491	-0.6198	-0.542118	-0.6198	-0.542118	-0.557745	-0.555804	-0.832092	0.578491	0.505863	-0.0561038	-0.0799036	0.475255	0.327637	-0.159386	-0.00207971	-0.159386	-0.00207971	-0.0382457	-0.362949	-0.240789	-0.48437	-0.60147	-0.411928	-0.316667	-0.0243759	0.01687	-3.11404e-05	0.211969	-0.0373834	0.576868	0.515497	0.00368111	-0.07283	-0.333116	-0.186034	0.559307	0.524295	0.29097	-0.619241	-0.0294281	-0.620277	-0.868881
5;6-Epoxyeicosatrienoic acid_0.0006	bioactive lipid	0.169437	0.187966	-0.041935	-0.306574	-0.305672	-0.125784	0.37649	0.297245	0.37649	0.297245	0.124529	0.334749	0.336115	-0.125784	-0.185921	-0.0489941	0.0798244	0.026516	-0.0523834	-0.0156593	-0.0419636	-0.0156593	-0.0419636	-0.155782	-0.00174332	0.000549316	0.0564175	-0.152727	-0.00510788	-0.0800495	0.327749	0.363894	0.104275	-0.00800323	0.334982	-0.0908508	-0.241236	-0.0532875	0.126347	-0.00429246	-0.0318775	-0.0688515	-0.121027	-0.00348751	0.39864	0.430849	0.399729	0.43067
5;8;11-Eicosatriynoic acid_0.0012	bioactive lipid	0.171958	0.149901	0.155684	-0.209545	-0.159988	-0.158054	0.439478	0.424486	0.439478	0.424486	0.0740242	0.451439	0.364975	-0.158054	-0.0766144	0.0610466	0.0735855	-0.0841141	0.0343227	3.8147e-06	-0.0706482	3.8147e-06	-0.0706482	-0.109673	-0.0230179	-0.0651226	0.041975	-0.111183	-0.00445557	-0.197239	0.153556	0.142274	0.0637745	-0.0757656	0.0950308	-0.204819	-0.104904	0.0315895	0.0717793	-0.00444794	-0.0286885	-0.0998116	-0.0853958	-0.00346021	0.402273	0.115251	0.39624	0.351461
5;8;11-Eicosatriynoic acid_0.006	bioactive lipid	0.301177	0.318113	0.0448647	-0.37298	-0.305672	-0.174124	0.172632	0.101688	0.172632	0.101688	-0.0957203	0.334749	0.0518131	-0.174124	-0.185921	-0.0427685	0.0798244	-0.240627	-0.0523834	-0.0156593	-0.139132	-0.0156593	-0.139132	-0.240402	-0.00174332	-0.0147095	-0.0252895	-0.0578737	-0.00510788	-0.155489	0.371328	0.386477	0.270901	-0.00800323	0.378073	-0.223419	-0.241236	-0.0501137	0.109501	0.215843	-0.0318775	-0.080204	-0.210505	-0.00348751	0.229694	0.338076	0.229807	0.227789
6-Formylindolo [3;2-B] carbazole_0.0012	bioactive lipid	0.271161	0.22386	-0.158247	-0.361523	-0.293411	-0.158054	0.32583	0.185228	0.32583	0.185228	-0.0630379	0.45034	0.174057	-0.158054	-0.108841	0.0275993	0.121071	-0.0727615	-0.0969448	3.8147e-06	-0.139252	3.8147e-06	-0.139252	-0.155571	-0.0133743	-0.0486431	0.0178051	-0.116798	0.0209351	-0.0551491	0.193936	0.231	0.122353	-0.0213223	0.170031	-0.204819	-0.104904	-0.0467262	0.0588398	-0.00444794	-0.0286885	-0.0420723	-0.125069	-0.00346021	0.293997	-0.138903	0.285522	0.402243
6-Formylindolo [3;2-B] carbazole_0.006	bioactive lipid	0.169437	0.254204	-0.103458	-0.309504	-0.298592	-0.125784	0.344629	0.277592	0.344629	0.277592	0.0684986	0.324373	0.238581	-0.125784	-0.185921	-0.0489941	-0.100088	-0.0338402	-0.0374908	-0.124058	-0.139009	-0.124058	-0.139009	-0.155782	-0.0284767	-0.0147095	-0.0254116	-0.0578737	-0.0949516	-0.0229206	0.381704	0.388308	0.392605	0.124458	0.38796	-0.0908508	-0.152491	-0.0532875	0.0754433	-0.00429246	-0.0318775	-0.0688515	-0.121027	-0.00348751	0.408894	0.384218	0.409494	0.430548
8-EPI-prostaglandin F2?_0.0012	prostaglandin	0.281517	0.222757	0.218428	-0.327831	-0.0896759	-0.149509	0.32583	0.0930653	0.32583	0.0930653	-0.118092	0.45034	0.107651	-0.149509	-0.172318	0.0275993	0.173195	-0.126717	0.0343227	3.8147e-06	-0.0706482	3.8147e-06	-0.0706482	-0.109673	0.0112991	0.0105572	-0.00388908	0.0378189	-0.00445557	0.0876198	0.256988	0.231	0.207647	-0.0757656	0.170031	-0.205063	-0.260422	0.0315895	0.200563	-0.00444794	-0.111409	-0.0998116	-0.125069	-0.00346021	0.366873	0.216783	0.357788	0.436422
8;9-Epoxyeicosatrienoic acid_0.003	bioactive lipid	0.218668	0.189615	0.133558	-0.060833	-0.0430145	0.0125446	0.417974	0.434193	0.417974	0.434193	0.0434303	0.621655	0.457584	0.0125446	0.00154877	0.00772476	0.158268	0	0.0278091	-0.000829697	0.0262241	-0.000829697	0.0262241	-0.0210514	0.00157928	0.0241756	0.129892	0.0335274	0.000387192	0.00185394	0.175768	0.174059	0.0641956	0.0220299	0.172043	0.0373459	-0.00281334	0	0.144016	0.0297733	-0.342793	0.0125122	0.00789261	-0.00706863	0.368849	0.058569	0.361366	0.387205
A-23187_0.0573	Calcium ionophore	-0.314259	-0.280307	-0.437565	0.118586	-0.0191727	-0.110647	-0.178492	-0.159672	-0.178492	-0.159672	-0.104265	-0.233309	-0.149347	-0.110647	-0.236214	-0.0489941	0.011343	-0.0338402	-0.0355377	-0.250523	-0.326143	-0.250523	-0.326143	-0.412491	-0.389927	-0.424866	-0.0594692	-0.134069	-0.798077	-0.368746	-0.314688	-0.345705	-0.0974388	-0.275826	-0.24526	-0.10379	-0.205347	-0.0501137	0.0291786	-0.0380854	-0.0318775	-0.0688515	-0.1784	-0.00348751	-0.357502	-0.071352	-0.356638	-0.432257
A-3_2.64	kinase inhibitor	0.299072	0.175312	0.459309	0.230505	0.343189	-0.367428	-0.494766	-0.55014	-0.494766	-0.55014	-0.277107	-0.54073	-0.550104	-0.367428	-0.166138	0.594063	0.410458	0.359165	0.310144	0.404118	-0.0123692	0.404118	-0.0123692	0.567205	0.0978699	0	0.114756	0.222397	0.393208	0.117311	-6.10352e-05	-6.10352e-05	0.219727	0.117249	-6.10352e-05	-0.353046	-0.155235	0.594753	0.376568	-0.679897	-0.66493	-0.225664	-0.0671959	-0.0613785	-0.232052	0.0443115	-0.196285	-0.259632
AG-1296_0.11265	kinase inhibitor	0.0762686	0.101968	-0.256901	-0.123468	-0.17823	-0.125784	-0.481226	-0.40015	-0.481226	-0.40015	-0.436052	-0.312777	-0.395197	-0.125784	-0.185921	0.0253124	0.0743313	0.026516	-0.0523834	-0.056675	-0.139009	-0.056675	-0.139009	-0.240402	-0.102085	-0.046936	0.220602	-0.152727	-0.0949516	-0.214815	-0.0279446	-0.0524921	-0.0368919	-0.0712357	-0.0252895	-0.0908508	-0.0949955	0.0205727	-0.0557899	-0.0380854	-0.0318775	-0.0688515	-0.221125	-0.00348751	-0.398884	0.0741596	-0.397532	-0.493048
AG-1296_2.82	kinase inhibitor	0.210836	0.225557	0.0869942	-0.0476437	-0.0331397	0.0307579	-0.626114	-0.604462	-0.626114	-0.604462	-0.49366	-0.563679	-0.551813	0.0307579	0.0146484	-0.00775909	-0.0105553	0.00857925	-0.0238895	-0.194889	-0.210001	-0.194889	-0.210001	-0.129521	-0.551361	0	0.0329685	-0.134384	-0.369892	-0.146608	-6.10352e-05	-6.10352e-05	-0.000976562	-0.0249634	-6.10352e-05	0.0312691	0.022789	-0.000514984	-0.0250053	-0.0475731	0.208021	-0.0249805	0.00579453	-0.0105972	-0.779415	-0.161499	-0.735836	-0.259632
AG-1296_0.564	kinase inhibitor	0.24232	0.244793	0.133558	-0.0631523	-0.0852509	0.00265694	-0.539923	-0.533924	-0.539923	-0.533924	-0.586399	-0.454174	-0.439518	0.00265694	0.0201035	0.00772476	-0.0813637	0	0.0278091	-0.12351	-0.0463657	-0.12351	-0.0463657	-0.0210514	-0.329704	-0.0227108	0.134287	0.0335274	-0.194479	-0.0121078	0.066637	0.106554	0.0641956	0.0704918	0.103439	-0.0429611	0.0278378	0	-0.098362	0.0705821	0.137714	-0.046936	0.0127754	-0.0547981	-0.543409	0.0669918	-0.541786	-0.542967
AG-370_2.895	kinase inhibitor	0.0939857	0.145656	0.07967	-0.10465	0.103207	-0.286495	0.451309	0.391571	0.451309	0.391571	-0.164925	0.55744	0.354425	-0.286495	0.0336914	0.00177765	-0.112118	-0.082798	-0.0724735	0.0984535	-0.0123692	0.0984535	-0.0123692	-0.014264	0.392181	0	-0.353891	-0.295151	0.108662	0.00891304	0.0894165	0.0894165	0.0478516	0.0751343	0.0894165	-0.274677	0.022789	-0.000514984	-0.0787163	0.0710106	0.245741	-0.128618	0.00420761	0.0496597	0.525075	0.159546	0.524465	0.527861
AG-490_2.55	kinase inhibitor	-0.194844	-0.222616	-0.0464668	0.198034	-0.108752	0.212765	-0.494766	-0.336884	-0.494766	-0.336884	0.347786	-0.565266	-0.291193	0.212765	0.171021	0.00177765	-0.112118	0.0731544	0.017786	-0.00470352	0.0251865	-0.00470352	0.0251865	0.130073	-0.058197	0	0.0760593	-0.00596619	-0.0938911	0.0474873	-6.10352e-05	-6.10352e-05	-0.000976562	-0.00115967	-6.10352e-05	0.215473	0.149498	-0.000514984	-0.0787163	-0.0962791	0.153456	0.227373	0.244686	-0.0613785	-0.232052	-0.0618896	-0.196285	-0.259632
AG-879_0.474	kinase inhibitor	-0.159661	-0.191913	-0.12892	0.0952568	-0.101364	0.00265694	-0.477667	-0.484486	-0.477667	-0.484486	-0.444431	-0.468822	-0.378727	0.00265694	0.0413437	0.00772476	-0.132389	0	-0.0297623	-0.000829697	0.0820103	-0.000829697	0.0820103	0.0543766	0.0186691	0.0241756	0.129892	0.0802803	0.0294399	0.00185394	-0.139147	-0.140856	-0.0705433	-0.0105553	-0.142258	0.0107346	0.0710506	0	-0.141209	-0.273738	0.0791206	-0.00897217	0.0127754	-0.0547981	-0.543409	-0.108496	-0.495277	-0.542967
AG1478_2.13	kinase inhibitor	-0.139758	-0.195165	-0.0721016	0.0890255	-0.0654007	-0.367428	-0.626114	-0.556854	-0.626114	-0.556854	-0.399422	-0.487995	-0.551813	-0.367428	-0.167969	0.137276	-0.0105553	-0.0338478	-0.138025	-0.0186195	-0.127481	-0.0186195	-0.127481	-0.191776	-0.551361	0	0.328012	0.019516	-0.154682	-0.146608	-6.10352e-05	-6.10352e-05	-0.000976562	-0.0249634	-6.10352e-05	-0.353046	-0.14315	0.12466	-0.0025444	-0.532558	0.0360241	-0.244829	-0.0671959	-0.0613785	-0.779415	0.0032959	-0.735836	-0.259632
AG213 (Tyrphostin 47)_0.0273	kinase inhibitor	0.228821	0.220674	0.218428	-0.22456	-0.0946808	-0.158054	0.416895	0.37285	0.416895	0.37285	0.0740242	0.419823	0.353745	-0.158054	-0.108841	0.0554314	0.264626	-0.0107498	0.154684	3.8147e-06	-0.147308	3.8147e-06	-0.147308	-0.0245895	-0.0407181	0.0337505	0.0396557	-0.0423355	-0.0652466	-0.0182838	0.118507	0.133236	0.122353	-0.0757656	0.156979	-0.123154	-0.167038	0.0315895	0.283693	-0.00444794	-0.111409	-0.0420723	-0.076973	-0.00346021	0.432058	0.216415	0.423584	0.436422
AM 92016_1.545	Potassium channels	-0.164451	-0.146391	-0.239216	-0.0242062	-0.0485808	-0.329342	-0.495865	-0.423187	-0.495865	-0.423187	-0.368904	-0.226276	-0.444635	-0.329342	-0.20105	0.141182	-0.00664902	0.199986	-0.138025	-0.0637856	-0.354654	-0.0637856	-0.354654	-0.129521	-0.111176	0	0.174814	0.272812	-0.158588	0.00891304	-6.10352e-05	-6.10352e-05	-0.000976562	-0.0249634	-6.10352e-05	-0.315693	-0.24044	0.121975	-0.0025444	-0.679897	-0.0548229	-0.128618	-0.145565	-0.0613785	-0.572262	0.0443115	-0.530636	-0.259632
Ac-Leu-Leu-Nle-CHO_1.95	protease inhibitor	-0.0924539	-0.155153	0.339436	0.321692	0.361203	0.213619	-0.642715	-0.555389	-0.642715	-0.555389	-0.37574	-0.605183	-0.582575	0.213619	0.436646	0.00177765	-0.00664902	0.541294	0.544031	0.0359535	0.298014	0.0359535	0.298014	0.332493	-0.0135193	0	0.17396	0.334213	0.0709419	0.215212	-6.10352e-05	-6.10352e-05	-0.000976562	0.219788	-6.10352e-05	0.368671	0.43795	-0.000514984	-0.0250053	-0.378506	-0.140028	-0.0249805	0.244686	-0.0613785	-0.779415	0.0443115	-0.735836	-0.259632
Ac-Leu-Leu-Nle-CHO_0.3915	protease inhibitor	-0.157394	-0.142158	0.133436	0.400066	0.278366	0.397676	-0.536016	-0.533924	-0.536016	-0.533924	-0.460178	-0.413891	-0.492741	0.397676	0.50692	0.00772476	-0.132389	0	0.277321	-0.000829697	0.0820103	-0.000829697	0.0820103	0.127985	0.257439	-0.0227108	-0.490976	0.122272	0.0294399	-0.0121078	-0.139147	-0.140856	-0.00486946	0.320126	-0.142258	0.486565	0.535772	0	-0.141209	-0.35174	-0.222309	0.0125122	0.296955	-0.0547981	-0.544874	0.0669918	-0.543251	-0.79199
Acetyl (N)-S-farnesyl-L-cysteine_0.01635	farnesylation inhibitor	0.224409	0.210808	0.166059	-0.289379	-0.0896759	-0.0763893	0.467432	0.353807	0.467432	0.353807	0.114063	0.45034	0.358139	-0.0763893	-0.108841	0.0275993	0.173195	-0.0107498	0.0343227	3.8147e-06	-0.0865173	3.8147e-06	-0.0865173	-0.142143	-0.00153351	-0.0180035	-0.0632153	-0.0423355	-0.00445557	-0.0704079	0.256988	0.231	0.149375	-0.0757656	0.170031	-0.0535736	-0.104904	0.0235329	0.110109	-0.00444794	-0.111409	-0.0203438	-0.076973	-0.00346021	0.352957	0.198584	0.423584	0.347311
Acetyl (N)-S-farnesyl-L-cysteine_0.408	farnesylation inhibitor	0.343239	0.320344	-0.0842419	-0.233562	-0.0946503	-0.0766315	-0.45606	-0.443348	-0.45606	-0.443348	-0.319553	-0.342113	-0.437443	-0.0766315	-0.156334	0.00772476	0.155338	0	-0.0297623	-0.000829697	-0.00840187	-0.000829697	-0.00840187	-0.0210514	0.0186691	-0.0227108	-0.0437107	0.0180244	0.0294399	-0.0121078	-0.0825062	0.0652943	0.0641956	-0.081356	-0.0851288	-0.0135422	-0.122076	0	0.144016	0.209583	0.251728	0.0022583	-0.107258	0.00621414	-0.376539	0.0669918	-0.289711	-0.284788
Actinomycin D_0.012915	Inhibits transcription	0.170978	0.243897	0.411421	0.212597	0.380203	0.596897	-0.549707	-0.538256	-0.549707	-0.538256	-0.804493	-0.378807	-0.76915	0.596897	0.542801	-0.114758	-0.143288	0.596199	0.441183	-0.248051	-0.0569763	-0.248051	-0.0569763	-0.379448	-0.815498	-0.850401	-0.306135	-0.298317	-0.815247	-0.777683	0.161583	0.111147	-0.056299	0.498251	0.0722366	0.595444	0.540451	-0.108616	-0.105715	-0.00444794	0.215392	0.466145	0.511055	-0.00346021	-0.535086	-0.136881	-0.531982	-0.771872
Actinomycin D_0.06465	Inhibits transcription	0.225503	0.23573	0.565861	0.2857	0.518237	0.488821	-0.483179	-0.444462	-0.483179	-0.444462	-0.718523	-0.426058	-0.684748	0.488821	0.388069	-0.0489941	0.0743313	0.561916	0.391739	-0.521519	-0.0402546	-0.521519	-0.0402546	-0.047816	-0.389927	-0.424866	-0.555441	-0.724019	-0.798077	-0.803926	-0.0388088	0.0517597	0.00808334	0.386177	0.0726528	0.426788	0.485376	0.0205727	0.109501	0.0798746	-0.0306568	0.381229	0.389582	-0.00348751	-0.458942	0.0596333	-0.458323	-0.741339
Actinomycin D_1.62	Inhibits transcription	0.152748	0.176109	0.400837	0.347069	0.355444	0.512569	-0.642715	-0.540497	-0.642715	-0.540497	-0.547005	-0.54073	-0.833063	0.512569	0.528687	0.169868	-0.571957	0.582432	-0.335413	-0.310368	-0.0308018	-0.310368	-0.0308018	-0.014264	-0.551361	0	-0.598642	-0.525009	-0.824726	-0.455202	-6.10352e-05	-6.10352e-05	-0.000976562	0.117249	-6.10352e-05	0.507099	0.499596	0.27322	-0.571758	-0.679897	0.297255	0.316607	0.779354	-0.0613785	-0.779415	-0.00915527	-0.735836	-0.259632
Actinomycin D_0.3225	Inhibits transcription	0.278349	0.320344	0.417982	0.459026	0.449997	0.439669	-0.536016	-0.486195	-0.536016	-0.486195	-0.838352	-0.506176	-0.750553	0.439669	0.555016	0.00772476	-0.391666	0	0.0278091	-0.226904	-0.0463657	-0.226904	-0.0463657	-0.000909805	-0.329704	-0.0227108	-0.36915	-0.532795	-0.194479	-0.0121078	-0.0825062	-0.0915394	-0.0220814	0.490047	-0.0851288	0.552483	0.544439	0	-0.278904	-0.434767	0.292377	0.270203	0.526325	-0.0547981	-0.544874	0.0669918	-0.543251	-0.79199
Ala-Ala-Phe-CMK_2.205	protease inhibitor	-0.164022	-0.222616	0.132893	0.284582	0.27113	0.543331	-0.642715	-0.604462	-0.642715	-0.604462	-0.332771	-0.611042	-0.534235	0.543331	0.408569	0.00177765	-0.112118	0.541294	0.310144	-0.0359535	0.144571	-0.0359535	0.144571	0.44821	9.15527e-05	0.0234375	0.0362644	0.0710297	0.020771	0.307009	-6.10352e-05	-6.10352e-05	-0.000976562	0.117249	-6.10352e-05	0.538349	0.433189	-0.000514984	-0.0787163	-0.432095	-0.0995007	0.142656	0.244686	-0.0613785	-0.779415	-0.161499	-0.735836	-0.259632
Alamethicin_0.07635	ionophore	-0.380371	-0.414523	-0.104994	0.19389	0.16655	-0.357759	-0.335333	-0.352894	-0.335333	-0.352894	-0.0824928	-0.348705	-0.263371	-0.357759	0.149254	-0.00137711	0.0252113	-0.0234375	0.122414	-0.0513668	-0.216654	-0.0513668	-0.216654	-0.000909805	-0.177361	-0.0227108	-0.0750828	-0.302937	-0.194479	-0.0121078	-0.241686	-0.238024	-0.0446644	0.0199547	-0.243088	-0.108757	0.190435	0.132812	0.0756569	-0.43489	-0.473652	-0.256409	0.0489082	-0.0547981	-0.401686	-0.108496	-0.402626	-0.316648
Amino-1;8-naphthalimide [4-Amino-1;8-naphthalimide]_3.54	PARP inhibitor	0.192638	0.219859	0.110554	-0.250769	0.106914	-0.119991	-0.0477448	-0.206512	-0.0477448	-0.206512	-0.164925	-0.0905342	-0.218561	-0.119991	-0.090332	0.00177765	-0.112118	-0.0300636	-0.217005	-0.00470352	-0.0287266	-0.00470352	-0.0287266	-0.129521	0.0179138	0	-0.00379372	-0.21666	0.020771	-0.0255146	0.690599	0.690599	0.571289	0.533752	0.690599	-0.1133	-0.0700302	-0.000514984	-0.0787163	0.0259666	0.248793	-0.0282764	-0.145565	0.0689468	0.345211	0.626343	0.268917	0.333485
Amino-1;8-naphthalimide [4-Amino-1;8-naphthalimide]_0.7065	PARP inhibitor	0.285641	0.265687	-0.0909557	-0.192425	-0.11528	0.0125446	-0.291632	-0.142811	-0.291632	-0.142811	-0.347263	-0.0707512	-0.283634	0.0125446	-0.0684433	0.00772476	-0.132389	0	-0.0881119	0.0153561	0.111429	0.0153561	0.111429	-0.0210514	0.0186691	0.0241756	0.129892	-0.0262032	0.0609341	0.038475	0.466784	0.458239	0.517321	0.573164	0.465012	0.0153732	-0.035162	0	-0.0956764	-0.0485539	0.139057	0.0022583	-0.0342598	0.00621414	-0.0890636	0.375314	-0.10453	0.0424786
Aminobenzamide (3-ABA) [3-Aminobenzamide (3-ABA)]_0.0441	ADP ribose polymerase inhibitor	0.181731	0.169663	0.169722	-0.289379	-0.173416	-0.072361	0.467432	0.335253	0.467432	0.335253	0.0316658	0.419456	0.353745	-0.072361	-0.0756378	0.0610466	0.142555	-0.0727615	0.0343227	3.8147e-06	-0.147308	3.8147e-06	-0.147308	-0.119194	-0.00153351	-0.103575	-0.0248852	-0.0203629	-0.0192261	-0.0777321	0.158121	0.133236	0.0800735	0.0357265	0.156979	-0.123154	-0.0740204	0.0235329	0.108278	-0.00444794	-0.0286885	-0.015583	-0.076973	-0.00346021	0.475515	0.13878	0.465576	0.487204
Amiodarone_1.0995	Calcium channels	-0.164022	-0.168879	-0.128986	0.107092	-0.0708235	-0.367428	-0.286758	-0.574677	-0.286758	-0.574677	-0.419075	-0.0905342	-0.511896	-0.367428	-0.090332	0.357002	-0.00664902	0.118198	-0.0902958	-0.057682	-0.226969	-0.057682	-0.226969	-0.014264	-0.211029	0	0.0322361	0.263535	-0.109638	-0.0255146	-6.10352e-05	-6.10352e-05	-0.000976562	-0.0249634	-6.10352e-05	-0.353046	-0.0970078	0.349148	-0.0250053	-0.679897	0.0239391	-0.225664	-0.145565	-0.0613785	-0.232052	0.0443115	-0.196285	-0.259632
Anisomycin_0.02265	inhibits protein synthesis	-0.171774	-0.155355	-0.158247	0.255932	0.246414	0.42551	-0.549707	-0.477221	-0.549707	-0.477221	-0.44939	-0.535301	-0.51915	0.42551	0.34346	0.0554314	-0.113625	0.555183	0.446066	-0.248051	-0.0586853	-0.248051	-0.0586853	-0.366997	-0.815498	-0.850401	0.115339	-0.132912	-0.815247	-0.777683	-0.205333	-0.166968	-0.228235	0.062582	-0.154896	0.383041	0.344162	0.0235329	-0.15906	-0.00444794	-0.111409	0.17757	0.0814896	-0.00346021	-0.535086	-0.299565	-0.531982	-0.771872
Anisomycin_0.1131	inhibits protein synthesis	-0.202709	-0.102488	0.0508461	0.371271	0.441414	0.426321	-0.483179	-0.444462	-0.483179	-0.444462	-0.718523	-0.426058	-0.684748	0.426321	0.527229	-0.0489941	-0.0615139	0.445461	0.221573	-0.521519	-0.0749226	-0.521519	-0.0749226	-0.0894214	-0.389927	-0.424866	-0.412863	-0.601317	-0.798077	-0.803926	-0.356436	-0.366091	-0.0499535	0.304146	-0.307394	0.437286	0.511744	-0.0532875	-0.0911903	-0.0380854	-0.0318775	0.331059	0.392633	-0.00348751	-0.458942	-0.376772	-0.458323	-0.741339
Anisomycin_2.82	inhibits protein synthesis	-0.256915	-0.324577	0.210041	0.443518	0.384059	-0.0306358	-0.642715	-0.553192	-0.642715	-0.553192	-0.547005	-0.601276	-0.833063	-0.0306358	0.418091	0.169868	-0.112118	0.115513	0.201136	-0.310368	-0.354654	-0.310368	-0.354654	-0.129521	-0.551361	0	-0.551279	-0.572739	-0.824726	-0.455202	-6.10352e-05	-6.10352e-05	-0.000976562	0.117249	-6.10352e-05	-0.0130806	0.331627	0.329006	-0.0025444	-0.679897	0.183607	0.0219288	0.244686	-0.0105972	-0.779415	0.0443115	-0.735836	-0.259632
Anisomycin_0.5655	inhibits protein synthesis	-0.186376	-0.191913	0.164564	0.45219	0.361862	0.131075	-0.536016	-0.530506	-0.536016	-0.530506	-0.838352	-0.506176	-0.750553	0.131075	0.538414	0.00772476	-0.24445	0	0.0737076	-0.226904	-0.0463657	-0.226904	-0.0463657	-0.0210514	-0.329704	-0.0227108	-0.512949	-0.642658	-0.194479	-0.0121078	-0.139147	-0.140856	-0.0705433	0.28204	-0.142258	0.213005	0.603277	0.140625	-0.257908	-0.481765	0.193256	0.230774	0.552326	-0.0547981	-0.544874	-0.108496	-0.543251	-0.79199
Aphidicolin_0.0177	Inhibits DNA synthesis	-0.121039	-0.193897	0.398603	0.0379143	0.100296	0.478733	-0.549707	-0.469408	-0.549707	-0.469408	0.498937	-0.535301	-0.454941	0.478733	0.468704	-0.218761	-0.244728	0.499031	0.243429	-0.248051	0.109589	-0.248051	0.109589	-0.0592575	-0.454659	-0.502256	0.055769	0.173561	-0.382385	-0.447361	0.100156	0.155448	-0.10924	0.44393	0.105509	0.534653	0.446457	-0.240574	-0.329714	0.00823212	0.324767	0.466145	0.513985	0.194637	-0.512136	-0.162585	-0.509033	-0.516012
Aphidicolin_0.08865	Inhibits DNA synthesis	0.0762686	0.0864652	0.582951	0.124811	0.237434	0.592581	-0.483179	-0.425907	-0.483179	-0.425907	-0.718523	-0.355379	-0.684748	0.592581	0.541267	-0.43022	-0.362173	0.188625	0.103653	-0.521519	0.110079	-0.521519	0.110079	0.159305	-0.389927	-0.424866	0.258444	-0.0899815	-0.798077	-0.803926	0.160757	0.316286	-0.094265	0.487373	0.156637	0.58963	0.546778	-0.438541	-0.383183	0.533367	0.601593	0.812992	0.735041	0.0364599	-0.458942	0.261904	-0.458323	-0.741339
Aphidicolin_2.22	Inhibits DNA synthesis	-0.147111	0.176109	0.260212	0.101843	0.256792	0.692582	-0.642715	-0.604462	-0.642715	-0.604462	-0.797493	-0.54073	-0.833063	0.692582	0.483276	-0.213203	-0.409481	0.359165	-0.0738163	-0.331364	-0.0308018	-0.331364	-0.0308018	0.0383449	-0.551361	0	-0.231211	-0.195175	-0.824726	-0.455202	-6.10352e-05	-6.10352e-05	-0.000976562	0.117249	-6.10352e-05	0.852802	0.386314	-0.250515	-0.426373	0.256069	0.297132	0.863359	0.575375	0.0699234	-0.779415	0.0032959	-0.735836	-0.259632
Aphidicolin_0.4425	Inhibits DNA synthesis	-0.353043	-0.33603	0.227552	0.0952568	0.205368	0.6113	-0.474493	-0.486195	-0.474493	-0.486195	-0.838352	-0.384106	-0.750553	0.6113	0.50692	-0.169834	-0.391666	0	-0.0131607	-0.226904	0.0820103	-0.226904	0.0820103	-0.000909805	-0.329704	-0.0227108	-0.403574	0.237263	-0.194479	-0.0121078	-0.0825062	-0.0915394	-0.0705433	0.275204	-0.0851288	0.660881	0.499517	0	-0.336277	-0.0721446	0.321918	0.955872	0.552326	0.0231819	-0.544874	-0.0252438	-0.543251	-0.79199
Aristolochic acid_2.205	phospholipase inhibitor	-0.19613	-0.195165	-0.0889473	0.0397091	-0.0641446	0.513058	-0.626114	-0.442841	-0.626114	-0.442841	0.428135	-0.611042	-0.386042	0.513058	0.309448	0.00177765	-0.0457115	0.314976	0.0768681	-0.110661	0.0692539	-0.110661	0.0692539	0.0383449	-0.111176	0	0.0506687	0.0660248	-0.295673	-0.146608	-6.10352e-05	-6.10352e-05	-0.000976562	0.117249	-6.10352e-05	0.507099	0.331627	-0.000514984	-0.0787163	-0.126431	0.0531139	0.43709	0.308041	0.0594254	-0.232052	-0.00915527	-0.196285	-0.259632
B581_0.318	farnesylation inhibitor	0.343239	0.320344	0.164564	-0.159832	-0.11528	-0.0766315	-0.52088	-0.466419	-0.52088	-0.466419	-0.448215	-0.413647	-0.447941	-0.0766315	-0.071373	0.00772476	-0.102726	0	-0.0776138	-0.000829697	0.0262241	-0.000829697	0.0262241	-0.0210514	0.00157928	-0.0227108	0.0295506	-0.0262032	0.0294399	-0.0121078	-0.0825062	-0.0915394	-0.00486946	-0.0303307	-0.0851288	-0.0135422	-0.0856991	0	-0.098362	0.24451	0.132221	0.0022583	-0.091877	0.0231819	-0.389845	0.0669918	-0.397743	-0.395018
BADGE_0.0177	PPAR ligand	0.249348	0.220674	-0.171186	-0.361523	-0.226883	-0.0763893	0.435328	0.366869	0.435328	0.366869	0.0316658	0.334496	0.271713	-0.0763893	-0.172318	0.0275993	0.173195	-0.0261307	-0.0239468	3.8147e-06	0.0916443	3.8147e-06	0.0916443	-0.231987	-0.0230179	-0.0651226	0.041975	-0.166725	-0.00445557	-0.12009	0.193936	0.231	-0.162059	-0.136557	0.170031	-0.0656586	-0.260422	0.0235329	0.0717793	-0.00444794	-0.0466113	-0.0203438	-0.0853958	0.0365484	0.326834	0.0917827	0.317871	0.345602
BADGE_2.205	PPAR ligand	0.152748	0.18481	0.339436	0.146276	0.331853	0.212765	-0.626114	-0.55014	-0.626114	-0.55014	-0.259163	-0.564533	-0.552546	0.212765	0.232056	0.00177765	-0.0105553	0.194492	0.201136	-0.00470352	0.0813389	-0.00470352	0.0813389	0.223149	0.0179138	0	0.313242	0.0771332	0.165913	0.117311	-6.10352e-05	-6.10352e-05	-0.000976562	0.117249	-6.10352e-05	0.216572	0.222984	-0.000514984	-0.0250053	-0.258999	0.0909557	0.142656	0.141537	0.00571442	-0.779415	0.0032959	-0.735836	-0.259632
BADGE_0.441	PPAR ligand	-0.353043	-0.33603	0.164564	-0.143597	-0.0793915	0.0536823	-0.477667	-0.484486	-0.477667	-0.484486	-0.493137	-0.389233	-0.441715	0.0536823	0.0938339	0.00772476	-0.0912514	0	-0.0131607	-0.000829697	0.111429	-0.000829697	0.111429	-0.000909805	0.257439	0.0952206	0.0822849	-0.0262032	0.0609341	-0.0121078	-0.0825062	-0.0915394	-0.0705433	0.0220299	-0.0851288	0.0952072	0.0710506	0	-0.0956764	-0.0524755	0.140644	0.0125122	0.0489082	-0.0547981	-0.543409	0.0669918	-0.541786	-0.488279
BAPTA-AM_0.0393	Calcium ionophore	0.251207	0.262017	0.010807	-0.309504	-0.305672	-0.110647	0.280298	0.216801	0.280298	0.216801	0.0799732	0.331209	0.206476	-0.110647	-0.187874	0.0215282	0.17211	-0.0145531	0.0382233	-0.0205421	-0.0749226	-0.0205421	-0.0749226	-0.102412	-0.00174332	0.0122681	-0.119406	-0.299724	-0.0480766	-0.00851631	0.293325	0.324587	0.128567	-0.0239944	0.296408	-0.0908508	-0.241236	-0.0213051	0.169559	-0.00429246	-0.0318775	-0.0688515	-0.210505	-0.00348751	0.302326	0.360048	0.249826	0.462042
BAPTA-AM_0.981	Calcium ionophore	-0.19613	-0.168879	0.195515	0.345373	0.27113	-0.5238	-0.642715	-0.599579	-0.642715	-0.599579	-0.516243	-0.601276	-0.833063	-0.5238	0.185913	0.596504	-0.0105553	0.45853	0.123377	-0.310368	-0.59379	-0.310368	-0.59379	-0.129521	-0.551361	0	-0.535166	0.232162	-0.824726	-0.455202	-0.0635376	-0.0635376	-0.000976562	0.00860596	-0.0635376	-0.530415	0.222984	0.610867	-0.0025444	-0.679897	0.101454	-0.489824	0.141537	-0.0613785	-0.779415	-0.0618896	-0.735836	-0.259632
BW-B 70C_2.37	lipoxygenase inhibitor	-0.164451	-0.201231	-0.0464668	0.15653	-0.0330171	-0.456905	-0.642715	-0.599579	-0.642715	-0.599579	-0.667122	-0.601276	-0.833063	-0.456905	0.050415	0.721504	0.168758	0.563267	0.20492	-0.467106	-0.467081	-0.467106	-0.467081	-0.014264	-0.551361	0	-0.291758	-0.0460052	-0.824726	-0.146608	-0.0635376	-0.0635376	-0.000976562	-0.0249634	-0.0635376	-0.441669	-0.0743027	0.670437	0.12022	-0.679897	-0.180677	-0.128618	0.0195885	-0.0613785	-0.779415	-0.0618896	-0.735836	-0.259632
Bafilomycin A1_0.000963	vacuolar ATPase inhibitor	-0.251125	-0.240465	-0.259443	-0.270824	-0.159988	-0.546116	-0.491968	-0.494677	-0.491968	-0.494677	-0.150196	-0.472313	-0.514755	-0.546116	-0.519241	0.616467	0.350075	-0.0841141	-0.131857	-0.248051	-0.557465	-0.248051	-0.557465	-0.522026	-0.815498	-0.850401	0.274275	0.017189	-0.815247	-0.643528	0.301105	0.231	0.493064	-0.0647793	0.305325	-0.524643	-0.505051	0.551365	0.294069	-0.00444794	-0.111409	-0.471027	-0.52253	-0.00346021	-0.512136	0.261942	-0.509033	-0.46279
Bafilomycin A1_0.004815	vacuolar ATPase inhibitor	-0.0936399	-0.102488	-0.408878	-0.251398	-0.305672	-0.438772	-0.456812	-0.454716	-0.456812	-0.454716	-0.176287	-0.428255	-0.405939	-0.438772	-0.516731	0.440962	0.434561	-0.166164	-0.0523834	-0.521519	-0.562471	-0.521519	-0.562471	-0.500941	-0.389927	-0.424866	0.151999	0.0190869	-0.798077	-0.803926	0.293325	0.129396	0.556667	-0.0836868	0.378073	-0.418732	-0.574732	0.438053	0.467655	-0.0380854	-0.0318775	-0.513676	-0.605036	-0.00348751	-0.441364	0.470508	-0.439768	-0.432257
Bafilomycin A1_0.02415	vacuolar ATPase inhibitor	-0.193178	-0.15141	-0.220716	-0.184612	-0.0946503	-0.576021	-0.468145	-0.469715	-0.468145	-0.469715	-0.455051	-0.451977	-0.378849	-0.576021	-0.46566	0.00772476	0.158268	0	-0.307106	-0.226904	-0.335917	-0.226904	-0.335917	-0.292048	-0.329704	-0.0227108	0.0409031	0.00825882	-0.194479	-0.0121078	-0.139147	-0.140856	-0.0705433	-0.336727	-0.142258	-0.626701	-0.456549	0.140625	0.205662	-0.118897	-0.141499	-0.563293	-0.537189	-0.0547981	-0.488234	0.0669918	-0.464394	-0.488279
Bafilomycin A1_0.12045	vacuolar ATPase inhibitor	-0.158447	-0.195165	0.132893	0.268103	0.297049	-0.187618	-0.642715	-0.601532	-0.642715	-0.601532	-0.502083	-0.605183	-0.702692	-0.187618	-0.0324707	0.71711	0.0442467	0.577183	0.0768681	-0.310368	-0.465372	-0.310368	-0.465372	-0.129521	-0.058197	0	-0.550303	-0.0118256	-0.488178	-0.455202	-6.10352e-05	-6.10352e-05	-0.000976562	-0.0249634	-6.10352e-05	-0.178364	-0.0743027	0.730007	0.0706596	-0.679897	-0.42494	-0.0249805	-0.145565	-0.0613785	-0.779415	0.0443115	-0.735836	-0.259632
Bay K-8644_2.1	Calcium channels	-0.164451	-0.168879	-0.171223	-0.115149	-0.0898186	-0.187618	-0.257095	-0.494843	-0.257095	-0.494843	-0.49366	-0.0382881	-0.447321	-0.187618	-0.166138	0.0608597	-0.0457115	-0.0300636	-0.327234	-0.00470352	-0.0287266	-0.00470352	-0.0287266	-0.014264	-0.111176	0	0.517099	0.114853	-0.0257759	0.00891304	-6.10352e-05	-6.10352e-05	-0.000976562	-0.0249634	-6.10352e-05	-0.165424	-0.244713	0.0520287	-0.0787163	-0.532558	0.0703259	-0.128618	0.00420761	-0.0613785	-0.232052	0.0443115	-0.26086	-0.259632
Benzamil_2.1	Calcium channels	-0.164022	-0.211097	-0.128986	0.0889034	-0.0708235	-0.0836143	-0.626114	-0.604462	-0.626114	-0.604462	-0.567024	-0.604694	-0.592829	-0.0836143	-0.090332	0.459908	0.158504	0.359165	0.0768681	-0.0359535	-0.0287266	-0.0359535	-0.0287266	-0.014264	-0.211029	0	0.315805	0.190536	-0.0918159	0.00891304	-6.10352e-05	-6.10352e-05	-0.000976562	-0.0249634	-6.10352e-05	-0.0794868	-0.0743027	0.349148	0.121197	-0.679897	-0.274305	-0.0282764	0.0195885	0.151955	-0.779415	-0.0618896	-0.735836	-0.259632
Blebbistatin_2.565	myosin II inhibitor	-0.139758	-0.153315	-0.13448	0.049963	-0.0887156	-0.456905	-0.49794	-0.540497	-0.49794	-0.540497	-0.439827	-0.32613	-0.534235	-0.456905	-0.360962	0.585884	0.280575	0.316929	-0.0738163	0.0994301	-0.00248146	0.0994301	-0.00248146	-0.191776	0.0978699	0	0.0723972	-0.0774994	0.0862007	-0.062624	-6.10352e-05	-6.10352e-05	-0.000976562	-0.0249634	-6.10352e-05	-0.419941	-0.415123	0.59988	0.316021	-0.679897	-0.056654	-0.225664	-0.170589	-0.0105972	-0.411983	0.0443115	-0.372311	-0.259632
Brefeldin A_0.02145	ARF GEF inhibitor	-0.232068	-0.229957	-0.44853	-0.19099	-0.409012	-0.413914	-0.19961	-0.444017	-0.19961	-0.444017	-0.301807	-0.242821	-0.330917	-0.413914	-0.485306	0.494274	0.263893	-0.0841141	-0.0987759	-0.0615273	-0.431	-0.0615273	-0.431	-0.514702	-0.344551	-0.284361	0.102888	-0.150978	-0.218323	-0.456882	0.100156	-0.0468391	0.326029	-0.0743008	0.0722366	-0.444931	-0.417648	0.471897	0.249392	-0.00444794	-0.111409	-0.471027	-0.483223	-0.00346021	-0.264944	0.138535	-0.264648	-0.284567
Brefeldin A_0.10695	ARF GEF inhibitor	-0.413432	-0.491949	-0.585026	-0.218317	-0.389656	-0.360647	-0.268946	-0.383427	-0.268946	-0.383427	-0.312883	-0.164705	-0.342829	-0.360647	-0.558479	0.178633	0.322256	-0.166164	-0.147598	-0.309605	-0.488253	-0.309605	-0.488253	-0.56099	-0.389927	-0.252014	-0.0130825	-0.247028	-0.598858	-0.399141	0.115103	-0.124025	0.427517	-0.30854	0.156637	-0.335236	-0.492701	0.16608	0.250126	-0.0380854	-0.0318775	-0.301762	-0.56402	-0.00348751	-0.285114	0.400576	-0.235544	-0.300665
Brefeldin A_2.67	ARF GEF inhibitor	-0.255689	-0.324577	-0.338459	0.146032	-0.220517	-0.536983	-0.480728	-0.604462	-0.480728	-0.604462	-0.508064	-0.50655	-0.600641	-0.536983	-0.265381	0.459908	0.0442467	-0.082798	-0.138025	-0.0359535	-0.354654	-0.0359535	-0.354654	-0.191776	-0.111176	0	-0.145029	-0.0774994	-0.367085	-0.062624	-6.10352e-05	-6.10352e-05	-0.000976562	-0.0249634	-6.10352e-05	-0.523212	-0.267418	0.27322	0.0706596	-0.679897	-0.193495	-0.489824	-0.170589	-0.0613785	-0.29858	-0.0618896	-0.372311	-0.259632
Brefeldin A_0.5355	ARF GEF inhibitor	-0.186928	-0.197979	-0.220716	-0.184612	-0.220261	-0.641573	-0.468145	-0.469715	-0.468145	-0.469715	-0.524876	-0.348705	-0.441715	-0.641573	-0.429771	0.00772476	0.158268	0	-0.0776138	-0.0513668	-0.335917	-0.0513668	-0.335917	-0.0419254	-0.329704	-0.0227108	0.023325	0.0180244	-0.194479	-0.0121078	-0.0825062	-0.0816517	0.0641956	-0.081356	-0.0851288	-0.626701	-0.313726	0.140625	0.205662	-0.428333	-0.130268	-0.563293	-0.3409	-0.0547981	-0.488234	0.0669918	-0.487465	-0.488279
Bromo-7-nitroindazole [3-Bromo-7-nitroindazole]_3.105	NOS inhibitor	0.170579	0.197065	0.0869942	-0.0893917	-0.0331397	0.0307579	-0.546402	-0.527069	-0.546402	-0.527069	-0.508064	-0.508015	-0.600641	0.0307579	-0.0457764	0.0156937	-0.00664902	0.0067482	0.017786	-0.057682	-0.0287266	-0.057682	-0.0287266	-0.129521	-0.058197	0	-0.0401707	-0.21666	-0.0851021	-0.0255146	-6.10352e-05	-6.10352e-05	-0.000976562	-0.0249634	-6.10352e-05	0.0312691	-0.0700302	0.0106468	0.0113335	-0.0912743	-0.0245495	-0.0282764	0.00420761	-0.0105972	-0.411983	-0.0618896	-0.735836	-0.259632
Bromo-cAMP [8-Bromo-cAMP]_0.0147	PKA activator	0.301125	0.206642	0.171431	-0.270824	-0.173416	-0.247776	0.317286	0.0790272	0.317286	0.0790272	-0.152637	0.334496	0.0866547	-0.247776	-0.0766144	0.0275993	0.0696793	-0.200569	-0.0969448	3.8147e-06	-0.162445	3.8147e-06	-0.162445	-0.221977	-0.0230179	-0.0180035	-0.0187817	-0.0452652	-0.00445557	-0.12009	0.162135	0.111147	-0.162059	-0.0757656	0.170031	-0.236557	-0.104904	-0.00510025	0.0588398	-0.00444794	0.155067	-0.0998116	-0.076973	-0.00346021	0.475515	0.159644	0.428955	0.38027
CA-074-Me_1.89	protease inhibitor	-0.19613	-0.195165	-0.0464668	0.0914669	-0.0641446	0.0290489	-0.626114	-0.55014	-0.626114	-0.55014	-0.332771	-0.612507	-0.552546	0.0290489	0.050415	0.0156937	-0.0105553	0.302036	-0.00521278	0.278385	0.285196	0.278385	0.285196	0.130073	0.297333	0.375	0.109873	-0.369858	0.41164	0.438112	-6.10352e-05	-6.10352e-05	-0.000976562	-0.0249634	-6.10352e-05	0.0168648	0.0329208	0.0520287	-0.0025444	-0.20187	0.198378	-0.0249805	0.00420761	0.139503	-0.572262	-0.0618896	-0.735836	-0.259632
CAPE_2.64	antioxidant	-0.391872	-0.369706	-0.0406075	0.218664	0.141902	-0.536983	-0.642715	-0.599579	-0.642715	-0.599579	-0.667122	-0.601276	-0.833063	-0.536983	0.129272	0.674629	-0.0669518	0.480503	0.0252323	-0.194889	-0.467081	-0.194889	-0.467081	0.00577747	-0.551361	0	-0.203379	0.188095	-0.553486	-0.277468	-0.142151	-0.142151	-0.000976562	-0.0161743	-0.142151	-0.455952	0.185875	0.688992	-0.0555229	-0.679897	-0.328993	-0.295244	0.102718	-0.0613785	-0.779415	-0.161499	-0.735836	-0.259632
CAPE_0.528	antioxidant	-0.157394	-0.164155	0.164564	0.158367	0.205368	-0.098238	-0.0328426	-0.109486	-0.0328426	-0.109486	-0.242039	0.0482903	-0.122135	-0.098238	0.0301132	0.00772476	0.197941	0	0.277321	0.138159	0.111429	0.138159	0.111429	0.322443	0.595573	0.791021	-0.119883	-0.337849	0.371481	0.70742	-0.0483265	-0.0816517	0.0641956	0.0647545	-0.0511932	-0.22094	0.0278378	0.25	0.22031	-0.112862	-0.162739	-0.00897217	0.0489082	-0.0547981	-0.0487804	0.0669918	-0.0583878	-0.0801983
CDC_2.34	lipoxygenase inhibitor	-0.360315	-0.390732	-0.0237713	0.390612	0.0791607	-0.126989	-0.280021	-0.416874	-0.280021	-0.416874	-0.163458	-0.619179	-0.518509	-0.126989	0.321706	0.270767	0.059703	0.427129	0.194369	-0.252062	-0.181229	-0.252062	-0.181229	0.0557731	-0.309656	-0.128589	-0.610232	0.250833	-0.0239286	-0.00753395	-0.142129	-0.274775	0.0396881	0.0207283	-0.131853	-0.121444	0.323355	0.270697	0.0403456	-0.720434	-0.0877604	-0.117191	0.0498776	-0.150014	-0.436003	-0.0232287	-0.412685	-0.110329
CGP-37157_2.31	inhibitor of mitochondrial Na+Ca+2 exchange	-0.194844	-0.201231	-0.0721016	0.195349	0.191779	-0.282223	-0.59169	-0.538055	-0.59169	-0.538055	-0.34034	-0.431232	-0.619196	-0.282223	-0.090332	0.656807	0.280575	0.334995	0.310144	0.127995	-0.17753	0.127995	-0.17753	0.282708	-0.136932	0.5625	-0.236948	-0.304672	0.342915	0.626467	-6.10352e-05	-6.10352e-05	-0.000976562	-0.0249634	-6.10352e-05	-0.26955	-0.0700302	0.670437	0.330669	-0.679897	-0.21913	-0.128618	-0.0200768	-0.0613785	-0.779415	-0.0618896	-0.735836	-0.259632
Calpeptin_2.07	protease inhibitor	-0.208385	-0.153315	-0.0723457	0.049963	-0.0654007	-0.119991	-0.626114	-0.55014	-0.626114	-0.55014	-0.454597	-0.50655	-0.551813	-0.119991	-0.090332	0.357002	0.262508	0.302036	0.201136	0.509586	0.347452	0.509586	0.347452	0.237303	0.637543	0.703125	-0.0260105	-0.316879	0.459736	0.604738	-6.10352e-05	-6.10352e-05	-0.000976562	-0.00115967	-6.10352e-05	-0.1133	-0.0700302	0.349148	0.316021	-0.432095	-0.0752087	-0.0282764	-0.0200768	-0.00669098	-0.29858	-0.00915527	-0.372311	-0.259632
Calphostin C_0.0189	kinase inhibitor	-0.257945	-0.168383	-0.12892	0.12138	-0.0793915	-0.0240192	-0.422491	-0.314442	-0.422491	-0.314442	0.0210915	-0.413647	-0.283634	-0.0240192	0.0413437	0.00772476	-0.102726	0	0.0278091	-0.000829697	-0.00840187	-0.000829697	-0.00840187	-0.0210514	0.00157928	0.0241756	-0.0567722	-0.0656319	0.000387192	0.038475	-0.0825062	-0.0915394	-0.0705433	0.0220299	-0.0851288	0.0153732	0.0278378	0	-0.14658	-0.347941	0.201679	0.0022583	0.0127754	-0.0547981	-0.434401	-0.108496	-0.439247	-0.395018
Calphostin C_0.0948	kinase inhibitor	-0.152319	-0.195165	-0.0520821	0.0602169	-0.0654007	0.0750694	-0.642715	-0.540497	-0.642715	-0.540497	-0.0669022	-0.605183	-0.547907	0.0750694	0.0482178	0.00177765	-0.112118	0.0183449	-0.0238895	-0.310368	-0.210001	-0.310368	-0.210001	-0.014264	-0.551361	0	0.167734	0.0248871	-0.553486	-0.0255146	-6.10352e-05	-6.10352e-05	-0.000976562	0.00860596	-6.10352e-05	0.0818062	0.047081	-0.000514984	-0.0787163	-0.234463	0.148939	0.00752449	0.0195885	-0.0613785	-0.779415	-0.0618896	-0.735836	-0.259632
Camptothecin_0.01725	Inhibits DNA synthesis	0.228821	0.210808	0.394941	0.348705	0.433996	0.602268	-0.549707	-0.526049	-0.549707	-0.526049	-0.124073	-0.535301	-0.456406	0.602268	0.554886	-0.114758	-0.352516	0.566902	0.446066	-0.248051	0.17807	-0.248051	0.17807	-0.159966	-0.815498	-0.850401	-0.541731	-0.506691	-0.815247	-0.777683	0.192282	0.0980952	-0.162059	0.660076	0.0722366	0.550034	0.551804	-0.191746	-0.356325	-0.00444794	0.569191	0.466145	0.548164	-0.00346021	-0.535086	0.212003	-0.531982	-0.550192
Camptothecin_0.0861	Inhibits DNA synthesis	0.20951	0.240387	0.478458	0.151423	0.304085	0.400076	-0.481226	-0.342167	-0.481226	-0.342167	0.327044	-0.471712	-0.435236	0.400076	0.541023	-0.0489941	-0.138784	0.600735	0.372696	-0.521519	-0.0402546	-0.521519	-0.0402546	0.175757	-0.389927	-0.424866	-0.416525	-0.12454	-0.798077	-0.803926	0.118521	0.0728779	0.270901	0.52375	0.120382	0.426788	0.546534	-0.0532875	-0.0911903	-0.0380854	0.119036	0.331059	0.529108	-0.00348751	-0.458942	0.18622	-0.458323	-0.741339
Camptothecin_2.16	Inhibits DNA synthesis	0.163348	0.15791	0.31551	0.264196	0.308017	0.369747	-0.642715	-0.601532	-0.642715	-0.601532	-0.512337	-0.605183	-0.833063	0.369747	0.309448	0.00177765	-0.138729	0.359165	0.0616093	-0.310368	-0.0579014	-0.310368	-0.0579014	-0.0214331	-0.551361	0	-0.199472	-0.111801	-0.824726	-0.455202	-6.10352e-05	-6.10352e-05	-0.000976562	0.117249	-6.10352e-05	0.245625	0.246422	0.0520287	-0.105572	-0.328823	0.256239	0.142656	0.141537	0.200783	-0.779415	0.0443115	-0.735836	-0.259632
Camptothecin_0.4305	Inhibits DNA synthesis	0.24232	0.244793	0.306166	0.297161	0.404587	0.557711	-0.53797	-0.484486	-0.53797	-0.484486	-0.838352	-0.506176	-0.750553	0.557711	0.538414	0.00772476	-0.152897	0	0.0777359	-0.226904	-0.00840187	-0.226904	-0.00840187	-0.000909805	-0.329704	-0.0227108	-0.180307	0.297565	-0.194479	-0.0121078	-0.0825062	0.174059	0.0641956	0.490047	0.0660858	0.49926	0.535772	0	-0.181858	-0.432194	0.234516	0.340881	0.552326	0.0231819	-0.544874	0.0669918	-0.543251	-0.79199
Cantharidin_0.0306	phosphatase inhibitor	0.281517	0.206642	0.191572	0.128368	0.16951	-0.0763893	-0.39712	-0.383959	-0.39712	-0.383959	-0.461964	-0.076561	-0.447617	-0.0763893	-0.267044	0.50819	0.23484	0.36927	0.150656	0.140995	0.398773	0.140995	0.398773	0.209635	0.46479	0.375914	-0.0649242	-0.247414	0.470764	0.28734	-0.115566	-0.246686	0.209853	0.0495205	-0.0994425	-0.0656586	-0.260544	0.417698	0.254396	-0.00444794	-0.111409	-0.0203438	-0.298164	-0.00346021	-0.342825	0.105324	-0.341309	-0.284567
Cantharidin_0.153	phosphatase inhibitor	0.436593	-0.223996	0.548934	-0.207819	-0.0509109	-0.267019	-0.434839	-0.454716	-0.434839	-0.454716	-0.437517	-0.41263	-0.451349	-0.267019	-0.474251	0.564131	0.493751	0.58987	0.522842	0.558994	0.369722	0.558994	0.369722	-0.532559	0.569614	0.380432	-0.601828	-0.553339	0.536846	-0.0229206	-0.0829983	-0.489992	0.606228	-0.00800323	0.334982	-0.240021	-0.531885	0.54987	0.465377	-0.0380854	-0.0318775	-0.0222206	-0.424494	-0.00348751	-0.458942	0.231142	-0.458323	-0.741339
Capsacin(E)_2.46	vanilloid receptor ligand	-0.122723	-0.121084	-0.0721016	0.12882	-0.0654007	-0.289303	-0.412491	-0.400116	-0.412491	-0.400116	-0.304329	-0.330524	-0.392023	-0.289303	0.0336914	0.233711	-0.0105553	0.122715	-0.0238895	-0.194889	-0.332071	-0.194889	-0.332071	-0.0214331	-0.357758	0	-0.166758	-0.024765	-0.419575	-0.0230732	-0.0635376	-0.0635376	-0.000976562	-0.0249634	-0.0635376	-0.266621	0.0329208	0.229641	-0.0250053	-0.679897	-0.0521374	-0.116411	0.0289879	-0.0105972	-0.411983	0.0443115	-0.372311	-0.259632
Capsazepine_0.3975	vanilloid receptor ligand	-0.159661	-0.15141	-0.12892	0.176189	0.205368	-0.350557	-0.468145	-0.469715	-0.468145	-0.469715	-0.586399	-0.0899162	-0.441715	-0.350557	-0.071373	0.00772476	0.155338	0	-0.0131607	-0.000829697	0.0820103	-0.000829697	0.0820103	0.127985	0.257439	0.651617	0.285654	-0.190998	0.217672	0.417381	-0.139147	-0.140856	-0.0705433	-0.081356	-0.142258	-0.195549	-0.0856991	0.0625	0.114475	-0.239424	-0.317402	-0.11615	-0.0342598	-0.00706863	-0.471632	0.0669918	-0.472572	-0.472654
Cerulenin_3.36	Fatty acid biosynthesis inhibitor	-0.322623	-0.494729	0.252461	0.353468	0.0787422	-0.522043	-0.280021	-0.603955	-0.280021	-0.603955	-0.586205	-0.669297	-0.853679	-0.522043	0.0315275	0.583476	0.375795	0.554465	0.567451	-0.000248812	-0.0871302	-0.000248812	-0.0871302	-0.000422886	-0.309656	-0.26182	-0.570542	0.180067	-0.0239286	-0.00753395	0.0301729	-0.0449337	0.105118	0.0723466	0.0348944	-0.505512	0.0481387	0.653091	0.420403	-0.720434	-0.138712	-0.129293	0.0340782	-0.150014	-0.436003	4.67106e-07	-0.412685	-0.110329
Cerulenin_0.672	Fatty acid biosynthesis inhibitor	-0.177548	-0.195169	0.061016	0.164651	-0.0547669	0.122576	-0.392087	-0.247684	-0.392087	-0.247684	-0.0350055	-0.494054	-0.236459	0.122576	0.127306	0.141379	-0.0131834	0.291313	0.132526	0.0102506	0.456914	0.0102506	0.456914	0.228675	0.0143165	0.0149239	0.398851	0.184687	0.387409	0.229753	-0.0243759	-0.0942974	-3.11404e-05	0.0457094	-0.0373834	0.127754	0.114478	0.0695991	0.00862106	-0.289925	-0.255552	0.00357367	0.0252022	-0.0473177	-0.500589	-0.0294281	-0.496602	-0.477802
Chelerythrine_0.0861	kinase inhibitor	-0.0823042	-0.161281	0.0222816	0.0731754	0.0910721	0.025198	-0.100367	-0.188236	-0.100367	-0.188236	0.0799732	-0.233309	-0.0872135	0.025198	-0.331917	-0.0428905	0.175528	0.0125999	0.0432281	-0.112339	-0.0419636	-0.112339	-0.0419636	-0.412491	-0.102085	-0.252014	-0.242331	-0.0456188	-0.196514	-0.507784	-0.425039	-0.406984	-0.295437	-0.539864	-0.367575	0.0376282	-0.412622	-0.0884438	0.187016	-0.0380854	-0.0318775	0.00683975	-0.439753	-0.00348751	-0.115803	-0.334047	-0.115915	-0.13294
CinnGEL 2Me_0.2895	phosphatase inhibitor	0.298815	-0.214002	0.133558	-0.0846367	0.115891	0.0536823	-0.539923	-0.469715	-0.539923	-0.469715	-0.100437	-0.467602	-0.441715	0.0536823	0.0201035	0.00772476	0.158268	0	0.0777359	0.668676	0.615335	0.668676	0.615335	0.0543766	0.00157928	0.0241756	0.463755	0.122761	0.0609341	0.038475	-0.0825062	-0.0915394	0.0641956	0.0704918	-0.0851288	0.0373459	0.0278378	0	0.144016	-0.0793137	-0.0879097	0.0125122	0.0127754	-0.00706863	-0.543409	0.0813961	-0.541786	-0.542967
Clozapine_2.295	dopamine antagonist	-0.194844	-0.141734	-0.171223	0.12528	-0.0887156	-0.470089	-0.571915	-0.538055	-0.571915	-0.538055	-0.498665	-0.403278	-0.619196	-0.470089	-0.20105	0.57795	-0.0105553	0.118198	-0.138025	0.194889	-0.0222569	0.194889	-0.0222569	-0.0598522	-0.0135193	0	0.202768	0.019516	-0.11684	-0.00158882	-0.252014	-0.252014	-0.000976562	-0.0249634	-0.252014	-0.523212	-0.244713	0.594753	-0.0025444	-0.679897	-0.0708141	-0.244829	-0.145565	-0.0613785	-0.779415	-0.161499	-0.735836	-0.259632
Curcumin_2.04	NFkappaB inhibitor	-0.337184	-0.349455	0.195515	-0.0996456	-0.0898186	-0.414425	-0.0925446	-0.213715	-0.0925446	-0.213715	0.41053	-0.428669	-0.100397	-0.414425	-0.473755	0.721504	0.579891	0.397007	0.017786	0.159245	-0.244547	0.159245	-0.244547	-0.180747	0.257172	0.0234375	-0.551279	-0.155136	0.14455	-0.13257	0.0137329	-0.0635376	0.610352	0.643127	0.0137329	-0.350117	-0.485924	0.670437	0.60606	-0.679897	-0.66493	-0.295244	-0.428036	-0.0613785	-0.0371056	0.704468	-0.0262413	0.0118294
Cyclo [Arg-Gly-Asp-D-Phe-Val]_0.261	integrin inhibitor	-0.0625923	-0.0788284	-0.0496112	-0.188534	-0.0770186	-0.498343	0.0320838	-0.124637	0.0320838	-0.124637	-0.291876	0.323637	-0.0939504	-0.498343	-0.23839	0.304778	0.368059	-0.00852795	-0.0691178	0.0102506	-0.0435487	0.0102506	-0.0435487	-0.166175	-0.000226079	-0.00107761	0.0647964	0.0252978	0.00184164	-0.00542279	-0.0243759	-0.0372383	-3.11404e-05	-0.0828188	0.0466956	-0.512869	-0.343622	0.321552	0.319586	-0.28584	-0.309794	-0.30282	-0.295222	-0.0572228	0.0718429	0.194328	0.0719022	0.184624
Cyclo [Arg-Gly-Asp-D-Phe-Val]_1.305	integrin inhibitor	0.0277731	-0.260922	0.183928	-0.0669866	0.0524448	-0.606656	0.262931	0.000299882	0.262931	0.000299882	-0.461624	0.629921	0.0132076	-0.606656	-0.587715	0.645	0.630643	0.109432	0.567451	-0.000248812	-0.0871302	-0.000248812	-0.0871302	-0.0186637	0.00315514	-0.00275203	-0.00186873	-0.00592493	0.022952	-0.00753395	0.278499	0.0342613	0.141006	0.000359983	0.288522	-0.621862	-0.53499	0.649882	0.631375	-0.40068	-0.236538	-0.63742	-0.464219	-0.503331	0.357494	0.140835	0.215803	0.442918
Cycloheximide_0.0213	inhibits protein synthesis	-0.131394	-0.165036	-0.257002	0.169262	-0.095047	0.0331764	-0.464624	-0.449877	-0.464624	-0.449877	0.021656	-0.458153	-0.352646	0.0331764	0.0167999	0.0554314	-0.101295	0.119392	0.0343227	-0.0151405	-0.0332947	-0.0151405	-0.0332947	-0.0366745	-0.217476	-0.284361	0.362165	0.113679	-0.00860596	-0.0925026	-0.25227	-0.246686	-0.267512	-0.133627	-0.178364	0.0329437	0.0182343	0.0315895	-0.107668	-0.00444794	-0.0466113	-0.0203438	0.00983429	-0.00346021	-0.444387	-0.245888	-0.441528	-0.424582
Cycloheximide_0.10665	inhibits protein synthesis	-0.254149	-0.230276	-0.162418	0.148005	0.09095	0.240042	-0.483179	-0.444462	-0.483179	-0.444462	-0.225359	-0.471712	-0.464045	0.240042	0.0754471	-0.0489941	-0.072134	0.208645	-0.0374908	0.0273781	0.265718	0.0273781	0.265718	-0.00320814	-0.00174332	-0.0147095	0.543966	0.0750918	0.107647	-0.0448933	-0.46459	-0.470095	-0.426785	-0.118965	-0.51943	0.190216	0.0748539	-0.0501137	-0.146854	-0.0380854	-0.0306568	0.069828	0.0225163	-0.00348751	-0.458942	-0.378603	-0.458323	-0.741339
Cycloheximide_2.67	inhibits protein synthesis	-0.255689	-0.174822	-0.0889473	0.16007	0.100297	0.32983	-0.642715	-0.601532	-0.642715	-0.601532	-0.797493	-0.601276	-0.833063	0.32983	0.408569	0.00177765	-0.19659	0.314976	0.0768681	-0.310368	-0.210001	-0.310368	-0.210001	-0.014264	-0.551361	0	-0.598642	-0.272324	-0.824726	-0.455202	-0.252014	-0.142151	-0.000976562	0.0473022	-0.252014	0.245625	0.394127	-0.000514984	-0.373638	-0.290859	0.0947399	0.227373	0.308041	-0.0613785	-0.779415	-0.161499	-0.735836	-0.259632
Cycloheximide_0.5325	inhibits protein synthesis	-0.164348	-0.140932	-0.12892	0.220135	0.170334	0.333467	-0.536016	-0.533924	-0.536016	-0.533924	-0.426975	-0.506176	-0.438297	0.333467	0.438805	0.00772476	-0.24445	0	-0.0131607	-0.000829697	0.111429	-0.000829697	0.111429	0.161554	-0.0718918	0.0952206	0.290781	0.359943	0.0162563	0.121971	-0.139147	-0.140856	-0.0705433	0.0704918	-0.142258	0.486565	0.416876	0	-0.252781	-0.433664	0.14394	0.230774	0.296955	-0.0547981	-0.544874	-0.108496	-0.543251	-0.79199
Cyclopiazonic acid_2.235	Calcium channels	-0.0757872	-0.0801837	-0.0889473	0.0876827	0.162919	-0.23193	-0.375137	-0.447601	-0.375137	-0.447601	-0.138191	-0.54073	-0.536554	-0.23193	-0.0324707	0.137276	0.0339928	-0.00455093	0.017786	-0.057682	-0.275187	-0.057682	-0.275187	-0.129521	-0.058197	0	-0.0843601	0.019516	-0.255512	-0.146608	-0.0161743	-0.0161743	-0.000976562	-0.0249634	-0.0161743	-0.253559	-0.0700302	0.12466	0.0513725	-0.532558	-0.307753	-0.244829	0.00420761	-0.0613785	-0.232052	-0.00915527	-0.196285	-0.259632
Cyclopiazonic acid_0.4455	Calcium channels	0.298815	0.277391	-0.0909557	-0.0631523	-0.0776825	-0.357759	-0.47547	-0.530506	-0.47547	-0.530506	-0.394871	-0.450512	-0.454655	-0.357759	-0.156334	0.00772476	0.066227	0	-0.0131607	-0.000829697	-0.0718784	-0.000829697	-0.0718784	-0.0210514	0.00157928	-0.0227108	-0.0378513	0.0335274	-0.0829067	-0.0121078	0.0589466	0.106554	0.0641956	-0.0105553	0.103439	-0.365471	-0.18714	0	0.0538063	-0.0610539	-0.0864449	-0.256409	-0.23177	-0.00706863	-0.481642	0.058569	-0.480019	-0.53491
Cyclosporin A_0.624	prolyl cis-trans isomerase inhibitor	-0.255689	-0.174822	-0.338459	0.0837765	-0.0822818	-0.3092	-0.494766	-0.55014	-0.494766	-0.55014	-0.336311	-0.508015	-0.595758	-0.3092	-0.0457764	0.244942	-0.112118	0.00857925	-0.138025	0.409489	0.0251865	0.409489	0.0251865	-0.00513408	-0.058197	0	0.374887	0.131699	0.108662	0.129763	-0.252014	-0.0635376	-0.000976562	-0.0249634	-0.252014	-0.295673	-0.0970078	0.228542	-0.0787163	-0.679897	0.125624	-0.244829	-0.0200768	-0.0613785	-0.232052	-0.161499	-0.372311	-0.259632
Cypermethrin_1.8	calcineurin inhibitor	-0.170793	-0.174822	-0.171223	0.0471554	-0.0295857	-0.286495	-0.480728	-0.527069	-0.480728	-0.527069	-0.508064	-0.224567	-0.5357	-0.286495	-0.167969	0.0608597	0.0442467	0.00857925	-0.0238895	-0.00470352	-0.0287266	-0.00470352	-0.0287266	-0.0214331	-0.211029	0	0.389414	0.286972	-0.017231	-0.00158882	-6.10352e-05	-6.10352e-05	-0.000976562	-0.0249634	-6.10352e-05	-0.274677	-0.0970078	0.0520287	0.0706596	-0.532558	-0.274305	-0.128618	-0.0671959	-0.00669098	-0.232052	0.0443115	-0.26086	-0.259632
Cytochalasin B_1.56	actin poison	-0.255689	-0.429479	0.361408	0.156408	0.191779	-0.434444	-0.546402	-0.540497	-0.546402	-0.540497	-0.332771	-0.549274	-0.534235	-0.434444	-0.360962	0.656807	0.600399	0.514683	0.544031	0.44611	0.0251865	0.44611	0.0251865	0.0376708	0.684174	0	-0.353891	0.365707	0.407124	0.150637	-6.10352e-05	-0.0635376	0.219727	-0.0249634	-6.10352e-05	-0.419941	-0.325645	0.730007	0.593365	-0.679897	-0.66493	-0.225664	-0.170589	-0.0613785	-0.572262	0.0443115	-0.735836	-0.259632
Cytochalasin B_0.3135	actin poison	-0.209416	-0.387807	-0.0909557	0.12138	-0.0793915	-0.396212	-0.539923	-0.530506	-0.539923	-0.530506	-0.537693	-0.385082	-0.454044	-0.396212	-0.337242	0.00772476	0.266178	0	0.179543	-0.0104733	-0.0718784	-0.0104733	-0.0718784	-0.0210514	-0.0718918	0.21314	-0.0341892	0.0603828	-0.0182095	0.121971	-0.139147	-0.140856	0.0641956	-0.081356	-0.142258	-0.484612	-0.313726	0.25	0.249851	-0.354926	-0.473652	-0.216614	-0.3409	-0.0547981	-0.543409	0.0669918	-0.541786	-0.542967
Cytochalasin D_0.01182	actin poison	0.0530156	0.102298	0.288868	0.123349	0.234675	0.0213017	-0.344011	-0.373356	-0.344011	-0.373356	-0.238971	-0.406623	-0.327606	0.0213017	-0.172121	-0.0225634	-0.0843303	-0.00220303	-0.256639	-0.00328905	0.0217983	-0.00328905	0.0217983	-0.0212978	0.00172331	-0.103633	0.101005	0.164741	0.00500473	0.00127162	0.093888	-0.129176	0.169413	0.0352987	0.0471104	0.0535288	-0.161243	-0.0275938	-0.101985	0.0297302	0.0592252	-0.0524105	-0.263006	-0.00230829	-0.20961	0.142571	-0.210604	-0.193017
Cytochalasin D_0.0591	actin poison	0.143829	0.0450458	0.32453	0.0907409	0.25262	-0.310908	-0.483933	-0.44597	-0.483933	-0.44597	-0.456043	-0.457101	-0.411129	-0.310908	-0.482138	0.447752	0.558822	0.0995247	0.481517	0.438916	0.111904	0.438916	0.111904	-0.0309383	0.101584	0.00399453	0.0781295	0.206262	0.331973	0.161285	0.133163	-0.100197	0.678278	0.16875	0.254697	-0.25659	-0.487767	0.422853	0.548535	-0.0067039	-0.041751	-0.00797287	-0.323862	0	-0.356538	0.412379	-0.357652	-0.329676
Cytochalasin D_0.2955	actin poison	0.385939	0.0607243	0.35531	0.0717476	0.295664	-0.573818	-0.278491	-0.482513	-0.278491	-0.482513	-0.202695	-0.26881	-0.46337	-0.573818	-0.192979	0.596352	0.572223	0.513341	0.583922	0.277131	0.150168	0.277131	0.150168	0.436858	0.60988	0.186206	-0.021444	0.306966	0.515862	0.299333	0.417407	0.171341	0.244451	0.0698793	0.37789	-0.653982	-0.186046	0.614765	0.556089	-0.687027	-0.67315	-0.30282	-0.0660783	-0.323476	-0.500589	0.254944	-0.50295	-0.477802
Cytochalasin D_1.4775	actin poison	0.348304	-0.00623432	0.561648	0.0220996	0.48848	-0.618618	-0.280021	-0.603955	-0.280021	-0.603955	-0.57337	-0.664972	-0.853679	-0.618618	-0.552524	0.662473	0.629039	0.377917	0.229979	-0.000248812	-0.118555	-0.000248812	-0.118555	-0.0929522	0.00315514	-0.26182	-0.22878	0.130402	-0.0239286	-0.0575479	0.0301729	-0.110991	0.105118	-0.0112417	0.0051092	-0.612167	-0.535548	0.653091	0.611809	-0.720434	-0.236538	-0.426273	-0.335975	-0.271985	-0.436003	0.250279	-0.412685	-0.110329
DRB_2.355	kinase inhibitor	-0.0881781	-0.0530919	0.146644	0.315836	0.0524448	0.482562	-0.280021	-0.603955	-0.280021	-0.603955	-0.622756	-0.669297	-0.853679	0.482562	0.286654	0.00618853	-0.109752	0.377917	0.0510238	-0.252062	-0.0290945	-0.252062	-0.0290945	0.0134321	-0.309656	-0.26182	0.456563	0.54007	-0.0239286	-0.0575479	0.0301729	-0.0101262	0.105118	0.0723466	-0.00657405	0.492503	0.310381	0.00242116	-0.12583	-0.288634	0.187045	0.20972	0.0820344	-0.0520564	-0.436003	4.67106e-07	-0.412685	-0.110329
Damnacanthal_2.655	kinase inhibitor	-0.158744	-0.174984	0.0177376	0.231014	0.0524448	0.267858	-0.280021	-0.354792	-0.280021	-0.354792	0.27517	-0.619179	-0.370839	0.267858	0.367081	0.0729436	-0.0427875	0.573787	0.0510238	-0.000248812	0.0666572	-0.000248812	0.0666572	0.133201	-0.309656	-0.0422331	0.495626	0.478477	-0.0239286	0.048131	0.00387542	-0.0101262	0.0396881	0.0723466	-0.00657405	0.377234	0.38725	0.135931	-0.0531107	-0.303465	0.104031	0.20972	0.271697	-0.103715	-0.436003	4.67106e-07	-0.412685	-0.110329
Dantrolene_0.477	Calcium channels	-0.353043	-0.240442	-0.12892	-0.126019	-0.0793915	-0.0240192	-0.488653	-0.477894	-0.488653	-0.477894	-0.0479469	-0.468822	-0.376286	-0.0240192	0.0301132	0.00772476	-0.132389	0	-0.0776138	-0.000829697	-0.0463657	-0.000829697	-0.0463657	-0.0210514	0.00157928	5.72205e-06	-0.0378513	-0.257648	-0.0829067	-0.0121078	-0.0825062	-0.0915394	-0.0705433	-0.0303307	-0.0851288	0.0153732	0.0278378	0	-0.0956764	0.174933	0.146259	0.0022583	0.0489082	0.193348	-0.434401	0.0669918	-0.439247	-0.437742
Decylubiquinone_0.465	inhibits mitochondrial permeability pore opening	-0.242994	-0.240442	0.164564	0.0531425	0.115891	0.0125446	-0.410284	-0.424061	-0.410284	-0.424061	-0.380466	-0.338696	-0.379093	0.0125446	0.0413437	0.00772476	-0.0813637	0	0.0737076	-0.000829697	-0.0463657	-0.000829697	-0.0463657	0.0543766	-0.013298	0.0241756	0.120371	0.190144	-0.0182095	0.121971	-0.0825062	-0.0915394	0.0641956	0.0704918	-0.0851288	0.0153732	0.0285702	0	-0.058445	-0.076587	-0.125385	0.0022583	0.0200996	-0.0547981	-0.488234	0.058569	-0.487465	-0.464842
Dexamethasone_0.0153	steroid hormone	-0.290193	-0.292477	-0.148662	0.204704	0.165234	0.28023	-0.46936	-0.471919	-0.46936	-0.471919	-0.254107	-0.455242	-0.485356	0.28023	0.371724	-0.657608	-0.487302	-0.0315348	-0.325836	-0.382056	0.0217983	-0.382056	0.0217983	-0.0535942	-0.174575	-0.225633	0.296352	0.154313	-0.294625	-0.407591	-0.298443	-0.275904	-0.356181	-0.0983219	-0.311759	0.276987	0.368205	-0.660825	-0.492958	0.34635	0.448366	0.242387	0.280968	0.0407859	-0.396238	-0.298472	-0.397127	-0.481451
Dexamethasone_0.0765	steroid hormone	-0.162265	-0.101793	-0.0408738	0.0899387	0.0799076	0.351156	-0.470891	-0.32791	-0.470891	-0.32791	-0.279634	-0.391218	-0.341549	0.351156	0.357696	-0.315079	-0.644201	-0.00368204	-0.160088	-0.179778	0.00999248	-0.179778	0.00999248	-0.143313	-0.133532	-0.30366	0.32527	0.0674857	-0.457077	-0.711613	-0.117992	-0.0508607	-0.229547	-0.0186385	-0.162551	0.390414	0.345747	-0.348983	-0.650202	-0.0067039	0.590734	0.237116	0.157776	0	-0.463402	-0.262303	-0.464412	-0.388584
Dexamethasone_1.905	steroid hormone	-0.158744	-0.129908	-0.0138313	0.117803	0.0524448	0.363143	-0.166077	-0.0843191	-0.166077	-0.0843191	-0.332089	-0.283834	-0.370839	0.363143	0.237478	-0.178343	-0.299868	-0.00445152	-0.105816	-0.252062	-0.0871302	-0.252062	-0.0871302	-0.0186637	-0.309656	-0.26182	0.0994552	0.180067	-0.0239286	-0.0575479	-0.112483	-0.110991	-0.030899	0.0723466	-0.103254	0.28317	0.0830508	-0.208057	-0.317829	-0.0577594	0.335229	0.0365548	0.0340782	-0.0520564	-0.013291	4.67106e-07	-0.11595	-0.110329
Dexamethasone_0.3825	steroid hormone	-0.21096	-0.124045	-0.10831	0.116397	-0.0547669	0.539987	-0.544361	-0.349875	-0.544361	-0.349875	-0.111945	-0.425121	-0.336033	0.539987	0.11482	-0.418827	-0.488176	-0.0796077	-0.198587	-0.159386	-0.0932837	-0.159386	-0.0932837	-0.087318	-0.362949	-0.240789	0.101173	0.280808	-0.411928	-0.316667	-0.0626711	-0.107446	-3.11404e-05	0.00811176	-0.0843979	0.527238	0.0865415	-0.333166	-0.413615	-0.0899948	0.0863653	0.188772	0.0252022	0.0370289	-0.381936	-0.0294281	-0.384402	-0.477802
Dichlorobenzamil_1.77	Calcium channels	-0.504464	-0.43193	-0.391804	-0.34989	-0.55814	-0.175533	-0.571915	-0.601532	-0.571915	-0.601532	-0.797493	-0.605183	-0.833063	-0.175533	-0.0457764	0.563545	0.326473	0.563267	0.21124	-0.331364	-0.465372	-0.331364	-0.465372	-0.106482	-0.551361	0.0234375	-0.0852146	-0.392563	-0.553486	-0.277468	-0.252014	-0.252014	-0.0185547	-0.0631714	-0.252014	-0.165424	0.0138779	0.649319	0.337383	-0.679897	-0.66493	-0.0282764	0.0386314	-0.0105972	-0.779415	-0.161499	-0.735836	-0.259632
Diphenyleneiodonium Cl_0.02145	NOS inhibitor	-0.0827904	-0.0850752	0.0958227	-0.0272246	-0.0224466	0.278905	-0.510445	-0.417092	-0.510445	-0.417092	0.263699	-0.479516	-0.465511	0.278905	0.185096	0.100723	-0.0968164	0.471825	0.0917397	0.412713	0.432931	0.412713	0.432931	0.027506	0.53953	0.0188809	-0.0404426	0.0760132	0.481114	-0.010828	0.0653235	0.0778015	0.0121868	0.158904	0.0866612	0.254177	0.124064	0.0872339	-0.117296	0.0216646	0.120538	0.325918	0.0932935	-0.00230829	-0.413607	0.160358	-0.414706	-0.397607
Diphenyleneiodonium Cl_0.10755	NOS inhibitor	0.0665947	-0.141825	0.490197	0.335928	0.484239	0.462903	-0.540514	-0.482222	-0.540514	-0.482222	0.442371	-0.529262	-0.45204	0.462903	0.36502	0.582727	0.518887	0.637332	0.504257	0.631508	0.479859	0.631508	0.479859	0.546528	0.713052	0.606952	-0.504539	-0.568183	0.537853	0.607853	-0.11698	-0.406535	0.606465	0.621247	-0.0293199	0.478339	0.275539	0.606865	0.493359	0.17551	-0.041751	0.734745	0.448304	0	-0.477353	-0.105564	-0.477805	-0.425205
Diphenyleneiodonium Cl_2.685	NOS inhibitor	-0.456561	-0.494729	0.146644	0.522483	0.225087	-0.129465	-0.280021	-0.603955	-0.280021	-0.603955	-0.876384	-0.669297	-0.853679	-0.129465	0.0267493	0.466219	0.321247	0.377917	0.484548	-0.0163272	-0.0871302	-0.0163272	-0.0871302	-0.0186637	0.447456	0.0804236	-0.61787	-0.430764	-2.80263e-06	-0.0575479	-0.418566	-0.500395	-0.030899	-0.0533734	-0.410104	-0.13543	0.0124593	0.429877	0.36167	-0.720434	-0.236538	-0.00349115	0.0340782	-0.503331	-0.436003	-0.374163	-0.412685	-0.110329
Diphenyleneiodonium Cl_0.537	NOS inhibitor	-0.05757	-0.195169	0.232333	0.314241	0.308882	0.319074	-0.6198	-0.589063	-0.6198	-0.589063	0.352598	-0.555804	-0.589068	0.319074	0.364645	0.240953	-0.0131834	0.468419	0.327637	-0.0223182	0.0498615	-0.0223182	0.0498615	0.185428	-0.0878377	-0.11401	-0.0835255	0.434443	-0.240402	-0.067295	-0.225966	-0.334392	-3.11404e-05	0.0457094	-0.256412	0.229596	0.392519	0.149433	-0.0201305	-0.419682	-0.329993	0.407975	0.421268	-0.137929	-0.619241	-0.0294281	-0.620277	-0.736382
Dipyridamole_0.297	phosphodiesterase inhibitor	-0.159661	-0.168383	-0.12892	-0.0145683	-0.0537567	-0.0240192	-0.536016	-0.530506	-0.536016	-0.530506	-0.522678	-0.506176	-0.531803	-0.0240192	0.0201035	0.00772476	-0.0590248	0	-0.0776138	-0.000829697	0.0820103	-0.000829697	0.0820103	-0.000909805	0.00157928	5.72205e-06	0.20875	0.0180244	0.0294399	-0.0121078	-0.0781116	-0.0536976	-0.0705433	-0.0105553	-0.0811005	0.0153732	0.0158749	0	-0.0956764	0.11954	0.165546	0.0022583	0.0127754	-0.0547981	-0.544874	-0.0304928	-0.543251	-0.79199
Dipyridamole_1.4865	phosphodiesterase inhibitor	-0.164451	-0.168879	-0.13448	-0.0631466	-0.13366	-0.0784874	-0.642715	-0.599579	-0.642715	-0.599579	-0.797493	-0.601276	-0.833063	-0.0784874	-0.0324707	0.00177765	-0.112118	-0.082798	-0.0902958	-0.0359535	-0.118326	-0.0359535	-0.118326	-0.0598522	-0.058197	0	0.0161228	-0.00608826	-0.0918159	-0.0255146	-6.10352e-05	-6.10352e-05	-0.000976562	-0.0249634	-6.10352e-05	-0.0769234	-0.0743027	-0.000514984	-0.0787163	-0.0962791	0.281874	-0.0249805	0.0195885	-0.00669098	-0.779415	-0.161499	-0.735836	-0.259632
Doxorubicin_0.01035	Inhibits DNA synthesis	0.160182	0.118691	0.157346	-0.16991	0.1607	0.193421	-0.283394	-0.249681	-0.283394	-0.249681	-0.0304047	-0.261359	-0.197653	0.193421	0.280764	0.0173667	-0.114813	0.429135	0.13715	-0.00328905	0.0946219	-0.00328905	0.0946219	0.00825376	0.00172331	-0.000256441	0.149276	-0.103531	0.00500473	-0.010828	0.118895	0.0967398	-0.0292069	0.158904	0.100612	0.194154	0.262004	0.0162238	-0.132746	-0.00281857	0.265737	0.199871	0.2433	-0.00230829	-0.18122	0.160358	-0.182109	-0.175927
Doxorubicin_0.05175	Inhibits DNA synthesis	0.0571324	0.045264	0.551511	0.183096	0.361053	0.693523	-0.541073	-0.537442	-0.541073	-0.537442	0.375581	-0.529262	-0.513075	0.693523	0.652803	-0.0605098	-0.4115	0.624253	0.572616	-0.516273	0.189959	-0.516273	0.189959	0.387732	-0.133532	-0.30366	-0.625876	-0.429337	-0.457077	-0.711613	-0.0410175	0.0445409	-0.130008	0.490458	-0.0293199	0.688416	0.566973	-0.0574095	-0.437695	-0.0067039	0.18112	0.902434	0.840882	0	-0.480561	0.00878003	-0.480874	-0.476962
Doxorubicin_0.258	Inhibits DNA synthesis	0.56808	0.506046	0.482577	0.286369	0.423202	-0.377528	0.452947	0.544664	0.452947	0.544664	0.487146	-0.109662	0.544425	-0.377528	-0.408416	-0.581494	-0.3268	-0.579468	-0.317285	-0.159386	-0.367	-0.159386	-0.367	0.520075	-0.362949	-0.240789	-0.602289	-0.426851	-0.411928	-0.316667	0.646586	0.867316	0.618056	0.329889	0.592106	-0.370291	-0.356387	-0.662686	-0.435309	-0.366374	-0.0915329	-0.372087	-0.50867	0.147276	0.487467	0.624294	0.571836	0.559729
E6 Berbamine_0.99	calmodulin inhibitor	-0.13487	-0.260922	-0.0138313	0.0696372	0.0524448	-0.661831	-0.280021	-0.603955	-0.280021	-0.603955	-0.586205	-0.59473	-0.853679	-0.661831	-0.435999	0.662613	0.578641	0.554465	0.132985	0.0119676	-0.0290945	0.0119676	-0.0290945	0.0134321	0.00315514	-0.26182	-0.300976	0.25317	-2.80263e-06	-0.0575479	0.278499	0.0873444	0.105118	-0.0533734	0.17824	-0.612167	-0.567356	0.614203	0.56905	-0.720434	-0.236538	-0.426273	-0.464219	-0.503331	-0.436003	4.67106e-07	-0.412685	-0.110329
EHNA HCl_0.5415	phosphodiesterase inhibitor	0.355561	0.336379	0.0841745	-0.0725071	-0.0547669	-0.0945346	0.228791	0.168931	0.228791	0.168931	-0.0144977	0.5219	0.195199	-0.0945346	-0.0700023	-0.0561038	0.177978	-0.0984415	0.129994	-0.000659398	-0.0250638	-0.000659398	-0.0250638	-0.087318	-0.000226079	-0.0341064	0.00913239	-0.00677802	-0.00707323	-0.0129214	0.305661	0.279844	-3.11404e-05	0.00811176	0.264225	-0.0878897	-0.0543149	-0.0279905	0.136969	0.166479	-0.146124	-0.00434097	-0.0274344	0.0458179	0.242602	0.194328	0.366022	0.296266
Estradiol_2.76	microtubule poison	-0.0351579	-0.377289	0.660734	0.522483	0.345135	-0.0192532	-0.166077	-0.354792	-0.166077	-0.354792	0.000267496	-0.571501	-0.370839	-0.0192532	0.219551	0.606809	0.611914	0.605735	0.629393	0.465127	0.591176	0.465127	0.591176	0.59923	0.63377	0.691089	-0.0478369	-0.525665	0.794855	0.81271	0.0301729	-0.136068	0.105118	0.168468	0.0348944	-0.0131152	0.250392	0.668576	0.678146	-0.587796	-0.236538	0.0365548	0.271697	-0.0436678	-0.260013	4.67106e-07	-0.412685	-0.110329
Estradiol_0.5505	microtubule poison	0.190941	-0.0788284	0.532103	0.322734	0.403679	-0.219325	-0.621195	-0.589063	-0.621195	-0.589063	-0.271648	-0.560832	-0.589068	-0.219325	0.127306	0.529423	0.626569	0.420323	0.483303	0.277131	0.612536	0.277131	0.612536	0.557533	0.694143	0.670476	-0.11917	-0.586821	0.663114	0.659266	0.144214	-0.0942974	0.244451	0.329889	0.1123	-0.274099	0.114478	0.476302	0.579492	-0.27835	-0.373935	-0.0720726	0.0711704	0.0613383	-0.607662	0.194328	-0.565241	-0.561054
Etoposide_0.0102	Inhibits DNA synthesis	0.307406	0.232273	0.51278	0.128534	0.300279	0.226205	-0.383492	-0.373356	-0.383492	-0.373356	-0.367179	-0.244374	-0.384665	0.226205	0.397603	-0.00160217	0.126044	0.429135	0.465972	-0.00328905	0.0726842	-0.00328905	0.0726842	0.0780082	0.0378561	0.0188809	-0.0513888	-0.134363	0.00500473	-0.010828	0.0712875	0.0967398	-0.0292069	0.158904	0.100612	0.194154	0.431821	-0.00244732	0.147081	0.0485762	-0.111879	0.245805	0.313822	0.204264	-0.26796	0.0983812	-0.268744	-0.324469
Etoposide_0.051	Inhibits DNA synthesis	0.390408	0.403679	0.615337	0.223065	0.429168	0.641439	-0.541073	-0.49371	-0.541073	-0.49371	-0.457228	-0.482352	-0.451482	0.641439	0.522595	0.0333405	0.151351	0.637087	0.527694	-0.0897248	0.489799	-0.0897248	0.489799	0.425574	0.0609872	-0.158431	-0.226253	0.424977	-0.0195775	-0.0203112	0.209998	0.239024	0.020214	0.627246	0.212704	0.542583	0.520098	0.0687097	0.177546	-0.0067039	-0.00628086	0.902434	0.622132	0	-0.480561	0.163635	-0.480874	-0.476962
Etoposide_0.255	Inhibits DNA synthesis	0.155924	0.137435	0.421507	0.296896	0.292944	0.933541	-0.6198	-0.569671	-0.6198	-0.569671	0.22704	-0.555804	-0.589068	0.933541	0.52944	-0.153272	-0.145508	0.535314	0.444729	-0.159386	0.210959	-0.159386	0.210959	0.17343	-0.362949	-0.240789	-0.48437	-0.352028	-0.411928	-0.316667	-0.0243759	0.0535608	-3.11404e-05	0.211969	-0.0373834	0.931605	0.53168	-0.246671	-0.11402	-0.0935039	0.102418	0.966674	0.599142	0.0579552	-0.619241	-0.0294281	-0.620277	-0.868881
Etoposide_1.275	Inhibits DNA synthesis	0.0516383	0.132596	0.483279	0.522483	0.345135	0.927875	-0.280021	-0.354792	-0.280021	-0.354792	0.255987	-0.669297	-0.370839	0.927875	0.887798	-0.178343	-0.205246	0.601201	0.484548	-0.252062	0.0424873	-0.252062	0.0424873	0.133201	-0.309656	-0.26182	-0.61787	-0.543313	-0.0239286	-0.0575479	0.0301729	0.0342613	-0.030899	0.38959	0.0348944	0.925259	0.716956	-0.208057	-0.158579	-0.375532	0.21414	0.935969	0.92697	-0.264748	-0.436003	4.67106e-07	-0.412685	-0.110329
FCCP_0.11805	mitochondrial uncoupler	-0.194807	-0.0849899	-0.215086	0.247793	0.159532	-0.0170673	-0.430738	-0.430878	-0.430738	-0.430878	-0.0351092	-0.453927	-0.389715	-0.0170673	0.0729579	0.00369481	-0.017213	0.00437958	0.0136386	-0.179778	-0.0456719	-0.179778	-0.0456719	-0.143313	-0.133532	-0.30366	0.186179	0.100793	-0.05864	-0.188733	-0.286274	-0.288623	-0.130008	-0.0186385	-0.328915	0.0252838	0.0355139	0.000559593	-0.0420479	-0.0067039	-0.041751	0.0123674	-0.100159	0	-0.375232	-0.377049	-0.378195	-0.391583
FCCP_2.955	mitochondrial uncoupler	-0.212061	-0.379611	0.362848	0.201194	0.225087	-0.231446	-0.280021	-0.603955	-0.280021	-0.603955	-0.462391	-0.619179	-0.853679	-0.231446	-0.0214479	0.606809	0.501528	0.601201	0.570904	-0.000248812	-0.0871302	-0.000248812	-0.0871302	-0.0929522	0.00315514	-0.26182	-0.336481	-0.613661	-0.0239286	-0.0575479	-0.203024	-0.279971	0.0396881	0.000359983	-0.191702	-0.240027	-0.0446858	0.668576	0.545473	-0.720434	-0.236538	-0.0954275	0.017372	-0.503331	-0.436003	-0.21031	-0.412685	-0.110329
FCCP_0.5895	mitochondrial uncoupler	-0.0444562	-0.119209	0.061016	0.269173	0.157515	-0.380179	-0.621195	-0.587109	-0.621195	-0.587109	-0.558931	-0.498332	-0.524893	-0.380179	-0.0769429	0.304778	0.129813	0.0624482	0.129994	0.0102506	-0.0435487	0.0102506	-0.0435487	0.0927588	-0.000226079	-0.00107761	-0.17609	0.259219	-0.00707323	0.055088	0.00746046	-0.0114291	-3.11404e-05	0.0457094	-0.00923748	-0.369802	-0.139939	0.232929	0.136969	-0.461922	-0.192266	-0.264804	-0.0747976	-0.0350758	-0.550951	-0.0294281	-0.552336	-0.620136
FK-506_0.933	prolyl cis-trans isomerase inhibitor	-0.296811	-0.376311	-0.0138313	0.127045	-0.000686957	-0.231446	-0.280021	-0.603955	-0.280021	-0.603955	-0.525414	-0.664972	-0.853679	-0.231446	0.0315275	0.0729436	-0.109752	0.0368176	-0.105816	-0.000248812	-0.0290945	-0.000248812	-0.0290945	0.0134321	-0.309656	0.010146	0.422593	0.216932	-0.0239286	0.048131	-0.142129	-0.192395	-0.030899	-0.0533734	-0.131853	-0.209718	0.00956446	0.0601779	-0.12583	-0.471272	0.111573	-0.0954275	-0.000840168	-0.150014	-0.436003	4.67106e-07	-0.412685	-0.110329
Fipronil_1.71	Misc. channels	-0.208201	-0.164467	-0.13448	0.135168	-0.0654007	0.0142784	-0.626114	-0.463837	-0.626114	-0.463837	-0.0941238	-0.508381	-0.470514	0.0142784	0.101074	0.0608597	-0.112118	0.199619	-0.0238895	-0.057682	-0.0579014	-0.057682	-0.0579014	-0.0598522	-0.0135193	0	-0.0864353	-0.0346527	-0.0918159	-0.146608	-0.252014	-0.252014	-0.000976562	-0.0249634	-0.252014	0.0168648	0.149498	0.0520287	-0.0787163	-0.532558	-0.018568	-0.0249805	0.0696373	-0.00669098	-0.572262	-0.161499	-0.735836	-0.259632
Fluspiriline_0.315	Potassium channels	-0.0955982	-0.140932	0.0907116	0.119671	0.195236	-0.234591	-0.313238	-0.322498	-0.313238	-0.322498	-0.180149	-0.413891	-0.250065	-0.234591	0.0301132	0.0288429	0.078434	0	0.0558853	-0.0104733	-0.0718784	-0.0104733	-0.0718784	-0.000909805	-0.329704	-0.0227108	-0.0435886	0.252766	-0.194479	-0.0121078	-0.0483265	-0.0536976	0.063097	0.0704918	-0.0511932	-0.22094	0.0158749	0.25	0.0608864	-0.411452	-0.260517	-0.11615	-0.0342598	-0.0547981	-0.433912	0.0813961	-0.433144	-0.464842
Furoxan_4.005	NO donor	-0.318189	-0.443551	0.352245	0.0220996	0.0524448	-0.513185	-0.280021	-0.603955	-0.280021	-0.603955	-0.571696	-0.669297	-0.853679	-0.513185	-0.575891	0.584279	0.677414	0.337006	0.356897	-0.142234	-0.181229	-0.142234	-0.181229	-0.292241	0.0141415	0.0124479	-0.570542	-0.562984	-0.0239286	-0.0575479	-0.456582	-0.596761	-0.030899	-0.144752	-0.612461	-0.517614	-0.565682	0.590626	0.615715	-0.720434	-0.236538	-0.290775	-0.463661	-0.503331	-0.436003	-0.374163	-0.412685	-0.110329
Furoxan_0.801	NO donor	0.0857159	0.046915	0.421507	0.216886	0.308882	0.413905	-0.612127	-0.462179	-0.612127	-0.462179	-0.153972	-0.509697	-0.515163	0.413905	0.44141	0.0359796	0.257394	0.492833	0.505361	0.0102506	0.5191	0.0102506	0.5191	0.555126	0.595022	0.498636	-0.0553447	-0.0427364	0.515862	0.425728	0.00746046	0.01687	-3.11404e-05	0.0698793	0.0123416	0.41741	0.392519	0.0695991	0.212653	-0.162813	-0.171543	0.407975	0.308963	-0.0572228	-0.5385	-0.0294281	-0.540548	-0.571308
GF-109203X_1.815	kinase inhibitor	-0.0351579	-0.116901	0.569495	0.564615	0.598762	0.203823	-0.280021	-0.354792	-0.280021	-0.354792	0.629732	-0.669297	-0.0682438	0.203823	0.558836	0.240668	-0.109752	0.42528	0.220841	-0.000248812	0.00677303	-0.000248812	0.00677303	0.133201	-0.309656	-0.26182	-0.245591	-0.469199	-0.0239286	-0.0575479	0.526894	0.283424	0.436172	0.630103	0.552472	0.220356	0.558148	0.229681	-0.0531107	-0.587796	0.187045	0.0365548	0.449571	-0.503331	-0.0486565	0.140835	-0.0378944	-0.110329
GF-109203X_0.363	kinase inhibitor	0.350957	0.317236	0.421507	0.18595	0.308882	0.319074	-0.528561	-0.383008	-0.528561	-0.383008	0.523949	-0.513957	-0.34409	0.319074	0.176517	-0.0561038	0.0484094	0.112044	0.3099	-0.159386	-0.0250638	-0.159386	-0.0250638	0.0927588	-0.362949	-0.240789	0.100267	0.372815	-0.411928	-0.168544	0.591201	0.597646	0.244451	0.329889	0.535535	0.323555	0.221412	-0.0175971	0.0283616	-0.16146	-0.219771	0.188772	0.122928	0.0669884	-0.518516	0.194328	-0.521505	-0.384785
GW-5074_0.288	kinase inhibitor	-0.0444562	-0.0216444	-0.0496112	-0.049602	-0.0553947	0.00831806	-0.554161	-0.526423	-0.554161	-0.526423	-0.557745	-0.419133	-0.541356	0.00831806	-0.0769429	-0.127253	-0.0424454	-0.0984415	-0.0157746	-0.000659398	-0.0250638	-0.000659398	-0.0250638	0.0433378	-0.0205944	-0.0341064	0.220872	0.143148	-0.00707323	-0.0129214	0.00746046	0.01687	-3.11404e-05	0.00811176	0.0466956	0.00972981	-0.031854	-0.0279905	-0.06289	0.0429889	0.0806478	-0.0225818	-0.0270158	-0.0360523	-0.607662	-0.0294281	-0.609395	-0.620136
GW-5074_1.44	kinase inhibitor	-0.0189131	-0.0231687	0.0665657	0.127045	0.0524448	0.0689532	-0.280021	-0.370208	-0.280021	-0.370208	-0.588716	-0.555737	-0.853679	0.0689532	0.177105	0.00618853	-0.00707323	0.0574998	0.0510238	0.234624	0.478174	0.234624	0.478174	0.133201	-0.309656	0.010146	0.371463	0.116207	-0.0239286	0.048131	0.278499	0.265428	0.105118	0.0723466	0.288522	0.0768359	0.158281	0.0156745	-0.0116417	-0.151178	0.11812	0.00439796	0.0820344	-0.0953263	-0.436003	4.67106e-07	-0.412685	-0.110329
GW-9662_2.715	PPAR ligand	0.0277731	-0.0231687	0.146644	0.201194	0.13629	-0.0192532	-0.0319388	-0.143227	-0.0319388	-0.143227	-0.0428875	-0.283834	-0.157041	-0.0192532	-0.0107755	0.705965	0.375795	0.601201	0.484548	0.234624	0.326667	0.234624	0.326667	0.234344	0.688283	0.691089	-0.101408	-0.471571	0.739923	0.589774	-0.112483	-0.110991	0.105118	0.0207283	-0.103254	-0.0131152	-0.0129475	0.649882	0.36167	-0.424292	-0.236538	0.00439796	0.017372	-0.271985	-0.0486565	4.67106e-07	-0.0378944	-0.110329
Geldanamycin_0.010695	HSP-90 inhibitor	0.366327	0.340889	0.478461	0.0797211	0.265994	0.0569811	-0.0857451	0.0487184	-0.0857451	0.0487184	-0.0359851	0.0830667	-0.0672824	0.0569811	0.0604793	-0.0590101	0.356547	-0.0283261	0.401275	0.0391428	-0.00216239	0.0391428	-0.00216239	0.31336	0.0378561	0.55742	-0.0540425	-0.476578	0.0762938	0.4605	0.118895	-0.183375	0.169413	0.221055	0.086138	0.0631898	-0.0386149	-0.0720623	0.39886	0.036504	-0.0407633	0.0933913	0.0458953	-0.00230829	0.0571966	0.0336491	0.068828	0.101255
Geldanamycin_0.05355	HSP-90 inhibitor	0.370802	0.32393	0.599572	0.255082	0.403882	0.256116	-0.540514	-0.550012	-0.540514	-0.550012	-0.505429	-0.528704	-0.513912	0.256116	0.0932215	0.409317	0.610858	0.596525	0.526787	0.555754	0.527605	0.555754	0.527605	0.513186	0.697427	0.685042	-0.589186	-0.54628	0.569103	0.605098	0.0839862	-0.167428	0.30973	0.459208	0.0611977	0.173931	0.179348	0.604563	0.562939	-0.0067039	-0.00628086	0.20768	0.0979968	0	-0.477353	0.163635	-0.477805	-0.474591
Geldanamycin_0.267	HSP-90 inhibitor	-0.0625923	-0.0788284	0.061016	0.213167	0.157515	0.0532399	-0.621195	-0.542118	-0.621195	-0.542118	-0.478016	-0.513747	-0.541356	0.0532399	0.127306	0.304778	0.177978	0.475255	0.3099	0.277131	0.657318	0.277131	0.657318	0.4717	0.694143	0.732139	-0.358009	-0.462937	0.647559	0.606183	-0.0243759	-0.0942974	-3.11404e-05	0.0457094	-0.0373834	0.0571628	0.107886	0.460259	0.32569	-0.366374	-0.119501	0.188772	0.0711704	0.065698	-0.550951	-0.00034052	-0.570682	-0.620136
Geldanamycin_1.338	HSP-90 inhibitor	-0.0653604	-0.195026	0.146644	0.315836	0.0787422	-0.127686	-0.280021	-0.603955	-0.280021	-0.603955	-0.453183	-0.669297	-0.853679	-0.127686	0.177105	0.483658	0.0587613	0.460227	0.229979	-0.000248812	-0.0290945	-0.000248812	-0.0290945	0.644222	-0.162718	0.691089	0.152643	-0.363417	-2.80263e-06	0.763742	0.0301729	-0.0101262	0.105118	0.0723466	0.0348944	-0.103901	0.196088	0.478356	0.123737	-0.720434	0.0186962	-0.0598876	0.161241	-0.271985	-0.436003	4.67106e-07	-0.412685	-0.110329
Genistein_2.88	kinase inhibitor	-0.0881781	-0.195026	0.183928	0.422351	0.0787422	0.629884	-0.280021	-0.233384	-0.280021	-0.233384	0.471319	-0.664972	-0.370839	0.629884	0.588901	0.00618853	-0.141874	0.601201	0.356897	-0.252062	0.0424873	-0.252062	0.0424873	0.133201	-0.309656	-0.26182	-0.506891	-0.425324	-0.0239286	-0.0575479	-0.0450306	0.00656875	-0.030899	0.104782	-0.0392889	0.611922	0.585597	0.00242116	-0.158579	-0.357314	0.104031	0.935969	0.92697	-0.0129939	-0.436003	-0.0232287	-0.412685	-0.110329
Genistein_0.576	kinase inhibitor	0.0390502	0.0778333	0.061016	-0.0926974	-0.0770186	0.00831806	-0.621195	-0.589063	-0.621195	-0.589063	-0.622268	-0.450191	-0.524893	0.00831806	-0.0853483	-0.127253	0.0151714	-0.0796077	0.132526	-0.0223182	-0.0250638	-0.0223182	-0.0250638	0.17343	-0.0205944	0.0149239	0.0302331	0.132859	-0.00707323	-0.00542279	-0.0243759	0.0535608	-3.11404e-05	0.00811176	0.0123416	0.00972981	0.087518	-0.0175971	0.0793521	0.0388251	0.0886	-0.00434097	0.010484	0.302305	-0.550951	-0.0294281	-0.552336	-0.620136
Go6976_0.07935	kinase inhibitor	0.0309714	-0.0803373	0.360872	-0.0601187	0.101043	-0.138301	-0.415305	-0.427072	-0.415305	-0.427072	-0.491234	-0.325405	-0.349745	-0.138301	-0.180798	0.398679	0.253297	0.210923	0.107005	-0.0897248	-0.164603	-0.0897248	-0.164603	-0.388848	-0.0450832	-0.30366	0.111088	-0.09183	-0.27739	-0.356423	-0.0298568	-0.0882473	0.0389431	-0.0186385	0.0125091	-0.0686013	-0.263611	0.4066	0.290897	-0.0067039	0.0403559	-0.00797287	-0.189933	0	-0.350469	0.0493074	-0.350991	-0.348266
Go6976_1.98	kinase inhibitor	-0.319	-0.364859	-0.172558	0.027366	-0.0216831	-0.0728595	-0.280021	-0.603955	-0.280021	-0.603955	-0.876384	-0.661659	-0.853679	-0.0728595	-0.0166349	0.536636	0.471777	0.504731	0.555558	-0.252062	-0.181229	-0.252062	-0.181229	-0.0929522	-0.309656	-0.26182	-0.570891	-0.120183	-0.0239286	-0.0575479	0.0331025	-0.0621979	0.105118	0.0723466	0.0346153	-0.13543	0.0204113	0.578663	0.467348	-0.720434	-0.138712	-0.290775	-0.000840168	0.0943574	-0.436003	0.06264	-0.412685	-0.110329
Go6976_0.396	kinase inhibitor	0.0441423	-0.00843731	0.327339	0.138254	0.170699	-0.0058069	-0.493231	-0.380253	-0.493231	-0.380253	-0.424724	-0.337996	-0.49891	-0.0058069	0.0952883	0.468632	0.273647	0.362009	0.383381	-0.159386	-0.191079	-0.159386	-0.191079	-0.00246165	-0.362949	-0.11401	-0.274862	0.13415	-0.240402	-0.168544	0.16678	0.168133	-3.11404e-05	0.0457094	0.264225	-0.0305864	0.0538266	0.591851	0.320179	-0.551037	-0.140433	0.0957891	0.0711704	0.0579552	-0.476872	0.194328	-0.478396	-0.560357
H-89_1.68	kinase inhibitor	-0.228	-0.376311	-0.0138313	0.0696372	0.0524448	-0.398264	-0.280021	-0.603955	-0.280021	-0.603955	-0.470168	-0.541123	-0.853679	-0.398264	-0.496232	0.508211	0.578641	0.193102	0.0510238	-0.0163272	-0.0871302	-0.0163272	-0.0871302	0.0134321	-0.162718	0.010146	0.301952	0.436415	-2.80263e-06	0.138742	0.00387542	-0.110991	0.105118	-0.0533734	-0.0392889	-0.523823	-0.567356	0.55669	0.449735	-0.720434	-0.236538	-0.290775	-0.238982	-0.503331	-0.436003	4.67106e-07	-0.412685	-0.110329
H-89_0.336	kinase inhibitor	0.0467581	0.0778333	-0.0221628	-0.11912	-0.0770186	-0.380179	-0.0234342	-0.280469	-0.0234342	-0.280469	-0.393892	0.130385	-0.182399	-0.380179	-0.131909	-0.127253	0.112897	-0.342443	-0.0380948	-0.0223182	-0.174269	-0.0223182	-0.174269	-0.0233531	-0.201956	-0.0341064	0.222337	0.143148	-0.00707323	-0.0129214	0.0673795	0.0605014	-3.11404e-05	-0.0828188	0.1123	-0.369802	-0.154901	-0.0175971	0.0925357	0.138947	-0.15	-0.00434097	-0.0747976	0.0626288	-0.018969	-0.0294281	-0.0186796	-0.0166905
H7_2.58	kinase inhibitor	-0.0737926	-0.0700262	0.146644	0.309453	0.0524448	0.0285305	-0.280021	-0.603955	-0.280021	-0.603955	-0.660424	-0.669297	-0.853679	0.0285305	0.0315275	0.264699	0.0293947	0.460227	0.0763796	-0.252062	-0.0871302	-0.252062	-0.0871302	-0.0186637	-0.309656	-0.26182	-0.56171	0.546138	-0.0239286	-0.0575479	0.0301729	0.0342613	0.105118	0.0723466	0.0348944	0.0528753	0.043221	0.453872	0.0397876	-0.368837	-0.0968735	0.0630266	0.017372	-0.0436678	-0.436003	4.67106e-07	-0.412685	-0.110329
H7_0.5145	kinase inhibitor	0.190941	0.166119	0.232333	0.126112	0.157515	-0.185773	-0.354454	-0.462179	-0.354454	-0.462179	-0.478016	-0.0247021	-0.483424	-0.185773	0.0470531	0.0301551	0.129813	-0.0796077	0.218681	0.0102506	-0.00207971	0.0102506	-0.00207971	0.185428	-0.000226079	0.0149239	0.0468696	0.184687	0.0851285	-0.00542279	0.144214	0.098692	-3.11404e-05	0.0457094	0.1123	-0.176443	0.0737415	-0.0175971	0.136969	-0.124352	-0.300454	-0.00434097	0.010484	0.0538397	-0.289302	-0.00034052	-0.291454	-0.384785
H9_2.31	kinase inhibitor	0.0516383	-0.0700262	0.146644	0.309453	0.0524448	0.267858	-0.280021	-0.603955	-0.280021	-0.603955	-0.631964	-0.669297	-0.853679	0.267858	0.125626	0.300622	0.0496583	0.554465	0.339947	-0.142234	-0.0871302	-0.142234	-0.0871302	-0.0186637	-0.309656	-0.26182	-0.276457	0.487545	-0.0239286	-0.0575479	0.0918358	0.160761	0.105118	0.0723466	0.0514262	0.220356	0.0481387	0.35231	0.0883716	-0.368837	-0.236538	0.120748	0.0340782	-0.137418	-0.436003	4.67106e-07	-0.412685	-0.110329
H9_0.462	kinase inhibitor	0.0390502	0.0472467	0.061016	-0.169207	-0.0502677	0.122576	-0.199564	-0.0882604	-0.199564	-0.0882604	0.0237751	-0.35727	-0.0269861	0.122576	0.0952883	0.141379	-0.0424454	0.286639	0.0697987	0.0102506	0.303	0.0102506	0.303	0.185428	0.244088	0.0407679	0.227673	0.0634535	0.284905	0.055088	-0.0243759	-0.0942974	-3.11404e-05	0.0457094	-0.0373834	0.127754	0.132545	0.0695991	0.0283616	-0.349876	-0.116131	0.188772	0.0711704	0.0804162	-0.289302	-0.0294281	-0.291454	-0.384785
HA-1004_2.55	kinase inhibitor	-0.142246	-0.195026	-0.0138313	0.127045	0.0524448	0.00415132	-0.166077	-0.354792	-0.166077	-0.354792	0.154006	-0.555737	-0.248315	0.00415132	0.219551	0.300622	0.0293947	0.326857	0.220841	0.234624	0.326667	0.234624	0.326667	0.133201	0.604683	0.402794	-0.0478369	-0.157676	0.645964	0.277274	0.0301729	0.00656875	0.105118	0.0723466	0.0348944	-0.0100809	0.151724	0.281997	0.0224536	-0.407096	-0.0811001	0.0365548	0.161241	-0.0520564	-0.436003	4.67106e-07	-0.412685	-0.110329
HA-1004_0.5115	kinase inhibitor	-0.0625923	-0.0788284	-0.0221628	-0.188534	-0.0770186	-0.0945346	-0.528561	-0.569671	-0.528561	-0.569671	-0.568557	-0.27307	-0.577907	-0.0945346	0.125004	0.0301551	0.0484094	-0.0796077	0.0697987	0.0102506	-0.00207971	0.0102506	-0.00207971	0.17343	0.0143165	0.3058	0.0513687	-0.0663832	0.0851285	0.229753	-0.0243759	-0.0942974	-3.11404e-05	0.00811176	-0.0373834	-0.176443	-0.091215	-0.0175971	0.0793521	-0.177504	-0.126816	-0.00434097	0.0711704	0.0614081	-0.518516	-0.0294281	-0.521505	-0.571308
HA1077_2.055	kinase inhibitor	0.106754	0.132596	0.146644	0.309453	0.0524448	-0.0110221	-0.280021	-0.603955	-0.280021	-0.603955	-0.332089	-0.621341	-0.853679	-0.0110221	0.0313531	0.264699	0.297949	0.307046	0.339947	0.0119676	0.0666572	0.0119676	0.0666572	0.133201	0.00315514	0.0354669	0.524051	0.32697	0.271696	0.192383	0.278499	0.265428	0.105118	0.0723466	0.288522	-0.0100809	0.043221	0.281997	0.27929	-0.368837	-0.236538	0.0365548	0.017372	-0.248547	-0.436003	4.67106e-07	-0.412685	-0.110329
HA1077_0.4125	kinase inhibitor	0.0467581	0.046915	-0.10831	-0.131288	-0.0553947	-0.185773	-0.199564	-0.383008	-0.199564	-0.383008	-0.393892	-0.192134	-0.34409	-0.185773	-0.181714	-0.00755466	0.0575124	-0.0984415	-0.0380948	-0.000659398	-0.0435487	-0.000659398	-0.0435487	-0.0233531	-0.000226079	0.0149239	0.0736204	0.0252978	-0.00707323	-0.00542279	0.021795	0.0535608	-3.11404e-05	-0.0828188	0.0123416	-0.176443	-0.130522	0.00368111	0.136969	-0.0532804	-0.0635651	-0.00434097	-0.0830287	-0.0347619	-0.289302	-0.0294281	-0.291454	-0.384785
HA14-1_0.366	Bcl-2 ligand	-0.162602	-0.168383	0.200331	0.379192	0.292282	0.0743122	-0.493414	-0.394886	-0.493414	-0.394886	-0.426975	-0.408031	-0.402897	0.0743122	0.334801	0.00772476	0.197941	0	0.460548	-0.0104733	0.0478306	-0.0104733	0.0478306	0.313288	0.067009	0.275885	-0.137217	0.0802803	0.0184536	0.319237	-0.0825062	-0.0915394	0.0641956	0.28204	-0.0851288	0.168205	0.344244	0.25	0.179295	-0.333205	-0.204487	0.0540161	0.296955	-0.00706863	-0.543409	0.0813961	-0.541786	-0.542967
HBDDE_2.22	kinase inhibitor	-0.0737926	-0.0700262	-0.0138313	-0.0669866	-0.0739291	0.489677	-0.0833827	-0.0566615	-0.0833827	-0.0566615	-0.148426	-0.283834	-0.248315	0.489677	-0.0633704	0.00618853	0.0293947	0.460227	0.010357	-0.000248812	0.0424873	-0.000248812	0.0424873	-0.0186637	0.157801	0.010146	-0.0344441	-0.0697154	0.209475	0.004395	-0.00882799	0.0342613	-0.030899	-0.0533734	-0.00657405	0.502547	-0.107674	0.0601779	0.0224536	-0.386338	-0.0622105	0.329942	-0.000840168	0.0833064	-0.013291	4.67106e-07	-0.00671418	-0.110329
Hinokitiol_4.575	iron chelator	-0.0737926	-0.0700262	0.0665657	0.117803	0.0524448	0.363143	-0.632211	-0.603955	-0.632211	-0.603955	-0.876384	-0.669297	-0.853679	0.363143	0.480642	-0.088429	-0.205246	0.0368176	-0.000940128	-0.252062	-0.0871302	-0.252062	-0.0871302	0.0134321	-0.309656	-0.26182	-0.515575	0.508541	-0.0239286	-0.0575479	-0.0450306	-0.0101262	-0.030899	0.0723466	-0.103254	0.377234	0.489789	-0.109773	-0.222579	-0.228988	0.319517	0.20972	0.271697	0.0689559	-0.436003	4.67106e-07	-0.412685	-0.110329
Hinokitiol_0.9135	iron chelator	-0.0625923	0.0778333	0.0569702	0.213167	0.157515	0.590524	-0.544361	-0.479688	-0.544361	-0.479688	0.57916	-0.559994	-0.145569	0.590524	0.193712	-0.299059	-0.242362	0.0716209	-0.0380948	-0.159386	-0.00207971	-0.159386	-0.00207971	-0.087318	-0.362949	-0.240789	-0.207584	0.178723	-0.411928	-0.316667	-0.0243759	-0.0372383	-3.11404e-05	0.0457094	-0.0373834	0.590436	0.2091	-0.246671	-0.29015	0.104712	0.114211	0.543543	0.195682	0.147276	-0.607662	-0.0294281	-0.609395	-0.53664
Hoechst 33342 (cell permeable) (BisBenzimide)_0.0534	DNA binding	0.072513	0.0992794	0.360872	0.0545732	0.179831	0.098401	-0.410513	-0.482222	-0.410513	-0.482222	-0.456043	-0.393066	-0.395923	0.098401	0.223279	0.402132	0.434659	0.534234	0.566757	0.00706575	0.0453231	0.00706575	0.0453231	-0.0552826	-0.00350952	-0.158431	-0.027697	-0.0756819	-0.000290384	-0.356423	-0.0698958	-0.0353579	-0.130008	0.000711558	-0.0181243	0.0935734	0.24122	0.366143	0.463644	0.0286068	-0.041751	0.111977	0.329093	0	-0.336588	-0.178807	-0.337563	-0.313214
Hoechst 33342 (cell permeable) (BisBenzimide)_0.267	DNA binding	0.161992	0.0883256	0.49304	0.260461	0.396006	-0.103324	-0.621195	-0.525586	-0.621195	-0.525586	0.033157	-0.509348	-0.541356	-0.103324	0.304866	0.643436	0.555245	0.50089	0.537781	-0.159386	-0.311127	-0.159386	-0.311127	-0.0382457	0.383178	-0.240789	-0.602289	0.223575	-0.0379745	-0.316667	0.220595	0.098692	0.059741	0.329889	0.182333	-0.0301679	0.339367	0.545394	0.554519	-0.687027	-0.67315	0.0366722	0.299686	-0.323476	-0.619241	0.194328	-0.620277	-0.650759
ICRF-193_2.655	Inhibits DNA synthesis	0.0516383	-0.0700262	0.483279	0.522483	0.345135	0.363143	-0.280021	-0.370208	-0.280021	-0.370208	-0.508917	-0.571501	-0.853679	0.363143	0.480642	0.595893	0.461593	0.620872	0.676163	0.0549363	0.326667	0.0549363	0.326667	0.644222	0.383736	0.663989	0.0340255	-0.0189341	0.365167	0.661133	0.0301729	-0.0449337	0.105118	0.0723466	0.0348944	0.377234	0.489789	0.631885	0.54753	-0.408702	-0.236538	0.329942	0.299738	-0.0514803	-0.436003	4.67106e-07	-0.412685	-0.110329
ICRF-193_0.531	Inhibits DNA synthesis	0.0857159	0.046915	0.421507	0.207423	0.292944	0.633144	-0.557998	-0.516727	-0.557998	-0.516727	-0.574382	-0.36579	-0.524893	0.633144	0.442875	0.240953	0.368059	0.568587	0.519677	0.0102506	0.456914	0.0102506	0.456914	0.419524	0.471557	0.0978619	-0.356789	0.0659298	0.173647	0.153058	0.144214	0.098692	-3.11404e-05	0.329889	0.1123	0.681605	0.431477	0.175556	0.431647	-0.333116	-0.270906	0.700072	0.421268	-0.0585133	-0.619241	0.194328	-0.620277	-0.650759
Indirubin_2.865	kinase inhibitor	0.106754	0.0700786	-0.0138313	-0.0669866	-0.000686957	-0.0192532	0.00037493	0.000299882	0.00037493	0.000299882	-0.0139394	-0.0221153	0.000302996	-0.0192532	-0.0107755	0.00618853	0.0293947	0.0368176	-0.000940128	0.129155	0.208747	0.129155	0.208747	0.323037	0.620622	0.573902	-0.203145	-0.549731	0.271696	0.549666	0.0301729	0.0342613	-0.030899	-0.0533734	0.0348944	-0.0131152	-0.107674	0.00242116	0.0224536	0.0640443	-0.0136944	-0.00349115	-0.000840168	-0.0436678	0.000177189	4.67106e-07	-0.00671418	0.0785205
Indirubin-3'-monoxime_2.7	kinase inhibitor	-0.0351579	-0.00623432	0.146644	0.292084	0.225087	-0.0618731	-0.280021	-0.603955	-0.280021	-0.603955	-0.489281	-0.669297	-0.853679	-0.0618731	0.118407	0.183156	0.0492747	0.377917	0.339947	-0.252062	-0.118555	-0.252062	-0.118555	-0.0401829	-0.309656	-0.26182	-0.483907	-0.566751	-0.0239286	-0.0575479	0.0301729	0.00967283	0.105118	0.0207283	0.0348944	-0.0599902	0.143214	0.176075	0.14292	-0.253351	-0.236538	-0.0374267	-0.0364149	-0.0953263	-0.436003	4.67106e-07	-0.412685	-0.110329
Indirubin-3'-monoxime_0.5415	kinase inhibitor	0.190941	0.0778333	0.421507	0.296896	0.308255	0.255493	-0.572053	-0.53713	-0.572053	-0.53713	0.00351139	-0.513747	-0.542506	0.255493	0.193712	0.240953	0.257394	0.492833	0.555291	0.0102506	0.426291	0.0102506	0.426291	0.543721	-0.000226079	0.614673	0.433623	-0.0427364	0.387409	0.606183	0.144214	0.0605014	-3.11404e-05	0.125299	0.1123	0.260951	0.228038	0.149433	0.431647	-0.308404	-0.192266	0.188772	0.122928	-0.137929	-0.607662	0.194328	-0.609395	-0.620136
Ionomycin_1.104	Calcium ionophore	-0.585804	-0.57687	-0.287966	0.0220996	-0.0739291	-0.606656	-0.280021	-0.603955	-0.280021	-0.603955	-0.631964	-0.669297	-0.853679	-0.606656	-0.573624	0.537683	0.630678	0.591679	0.611361	-0.252062	-0.400328	-0.252062	-0.400328	-0.38062	-0.309656	-0.26182	-0.377218	-0.511994	-0.0239286	-0.0575479	-0.29517	-0.398798	0.105118	-0.0533734	-0.405151	-0.60139	-0.568054	0.590974	0.63141	-0.720434	-0.236538	-0.426273	-0.464219	-0.503331	-0.436003	-0.21031	-0.412685	-0.110329
Juglone_4.305	PIN1 inhibitor	-0.259686	-0.376311	-0.0138313	0.0827162	0.0524448	-0.677735	-0.280021	-0.603955	-0.280021	-0.603955	-0.876384	-0.389582	-0.853679	-0.677735	-0.548582	0.367796	0.0496583	-0.450183	-0.259485	-0.0636556	-0.400328	-0.0636556	-0.400328	-0.292241	-0.309656	-0.26182	-0.222711	-0.223943	-0.0239286	-0.0575479	-0.112483	-0.192395	0.00550842	-0.0533734	-0.131853	-0.67512	-0.53499	0.229681	0.0883716	-0.368837	-0.0877604	-0.602822	-0.464219	-0.503331	-0.436003	-0.0933319	-0.412685	-0.110329
K252A_0.00642	kinase inhibitor	-0.16848	-0.141825	-0.125765	-0.0673732	-0.121551	0.098401	-0.0412563	0.0527966	-0.0412563	0.0527966	0.177722	-0.203369	0.0533586	0.098401	0.17323	-0.00529916	-0.22107	0.00437958	-0.107075	-0.0309218	-0.00591185	-0.0309218	-0.00591185	-0.0304151	-0.00350952	-0.00859833	0.0199543	-0.154574	-0.000290384	-0.0130567	-0.123049	-0.162558	-0.130008	-0.0186385	-0.121187	0.0609981	0.09913	-0.0133595	-0.200391	0.69439	0.504293	0.111977	0.15387	0	0.153831	-0.12656	0.150238	0.17789
K252A_0.0321	kinase inhibitor	0.0857159	0.0674544	0.421507	0.240559	0.292944	0.636666	-0.354454	0.0938408	-0.354454	0.0938408	0.154111	-0.495259	-0.195373	0.636666	0.617052	0.0301551	-0.0455495	0.555473	0.487187	0.0102506	0.657318	0.0102506	0.657318	0.228675	0.173008	0.0149239	-0.386818	-0.447033	0.0851285	-0.067295	-0.0243759	0.01687	-3.11404e-05	0.329889	-0.0373834	0.63473	0.53168	-0.0175971	-0.06289	-0.0602724	0.0852393	0.966674	0.861488	0.378272	-0.414337	-0.0294281	-0.417117	-0.415546
K252A_0.1605	kinase inhibitor	-0.0189131	-0.0153562	0.146644	0.50637	0.345135	0.648717	-0.280021	-0.603955	-0.280021	-0.603955	-0.469541	-0.669297	-0.853679	0.648717	0.573903	0.0729436	-0.141874	0.591679	0.339947	-0.252062	-0.00230875	-0.252062	-0.00230875	0.133201	-0.309656	-0.26182	-0.547279	-0.730848	-0.0239286	-0.0575479	-0.112483	-0.110991	-0.030899	0.0723466	-0.103254	0.649869	0.570355	0.135931	-0.158579	-0.255385	0.261914	0.491284	0.655416	-0.037444	-0.436003	4.67106e-07	-0.412685	-0.110329
KT-5720_0.0014175	kinase inhibitor	0.137679	0.130065	0.157346	-0.0770587	-0.0464421	-0.129979	0.408115	0.242775	0.408115	0.242775	-0.00930397	0.408785	0.326699	-0.129979	-0.172121	0.151853	0.104943	-0.0315348	0.0558162	-0.00328905	-0.0566406	-0.00328905	-0.0566406	-0.0535942	-0.0124655	-0.000256441	-0.00820623	-0.121807	-0.056065	-0.010828	0.104246	0.0454703	-0.0292069	-0.0465292	0.0472151	-0.231821	-0.161243	0.131946	0.10059	-0.00281857	-0.0407633	-0.158577	-0.0829698	-0.00230829	0.403144	0.0999507	0.40501	0.396735
Kavain (+/-)_0.651	voltage-dependent Na channel inhibitor	0.0857159	0.140002	0.061016	-0.0926974	-0.0770186	-0.0345457	0.199006	0.168931	0.199006	0.168931	-0.0742424	0.297563	0.00972187	-0.0345457	-0.0853483	0.0301551	-0.0424454	-0.0284428	-0.0691178	0.65398	0.541805	0.65398	0.541805	-0.0233531	-0.000226079	-0.00107761	0.37918	-0.0389348	0.0851285	-0.00542279	-0.0243759	0.01687	-3.11404e-05	0.00811176	-0.0373834	-0.0305864	0.0737415	-0.0175971	-0.0201305	0.100234	0.0672051	-0.00434097	0.010484	0.0673023	0.00854072	-0.0294281	0.00818151	-0.011982
LY-294002_2.445	kinase inhibitor	-0.142246	-0.223658	-0.0138313	0.315836	0.0524448	-0.261197	-0.166077	-0.354792	-0.166077	-0.354792	-0.555583	-0.283834	-0.370839	-0.261197	-0.0214479	0.595893	0.0293947	0.326857	0.0510238	0.234624	0.122077	0.234624	0.122077	0.168147	0.312167	0.298929	0.421791	0.199319	0.489888	0.393416	-0.112483	-0.110991	0.00550842	0.000359983	-0.103254	-0.240027	-0.0129475	0.570502	0.0397876	-0.408702	-0.236538	-0.0954275	-0.0155584	-0.0129939	-0.436003	4.67106e-07	-0.412685	-0.110329
LY-83583_0.11985	guanylate cyclase inhibitor	-0.112544	-0.124803	0.138949	0.259198	0.392791	0.303758	-0.541073	-0.552666	-0.541073	-0.552666	-0.552722	-0.482387	-0.764052	0.303758	0.373774	0.124335	0.206352	0.534234	0.572616	-0.179778	-0.0330812	-0.179778	-0.0330812	-0.0304151	-0.133532	-0.30366	-0.625876	0.513139	-0.457077	-0.711613	-0.439595	-0.327222	-0.454087	-0.0186385	-0.352632	0.344934	0.458261	0.154926	0.152958	0.0286068	-0.041751	0.20768	0.287868	0	-0.480561	-0.53867	-0.480874	-0.594569
LY-83583_3	guanylate cyclase inhibitor	0.106754	-0.116901	0.146644	0.309453	0.345135	-0.625943	-0.280021	-0.603955	-0.280021	-0.603955	-0.744966	-0.669297	-0.853679	-0.625943	-0.587715	0.662718	0.578641	0.554465	0.0763796	-0.252062	-0.400328	-0.252062	-0.400328	-0.292241	-0.309656	-0.26182	-0.735581	-0.565425	-0.0239286	-0.0575479	-0.112483	-0.192395	0.0396881	-0.0533734	-0.103254	-0.567559	-0.567356	0.669134	0.56905	-0.720434	-0.236538	-0.535787	-0.464219	-0.503331	-0.436003	4.67106e-07	-0.412685	-0.110329
LY-83583_0.6	guanylate cyclase inhibitor	-0.0194841	-0.179108	0.412369	0.238743	0.308255	-0.524745	-0.6198	-0.541281	-0.6198	-0.541281	-0.53089	-0.555804	-0.832092	-0.524745	-0.272151	0.486977	0.501813	0.475255	0.487187	-0.159386	-0.548466	-0.159386	-0.548466	-0.422035	-0.362949	-0.240789	-0.541045	-0.60147	-0.411928	-0.316667	-0.0243759	-0.0942974	-3.11404e-05	-0.0266664	-0.0373834	-0.50251	-0.239792	0.474175	0.509179	-0.687027	-0.540093	-0.30282	-0.301709	-0.323476	-0.619241	0.0827903	-0.620277	-0.868881
Latrunculin B_0.0759	actin poison	-0.166019	-0.27805	-0.27361	-0.123177	-0.335872	-0.506674	-0.0257622	-0.309893	-0.0257622	-0.309893	-0.351376	0.0285993	-0.236673	-0.506674	-0.512969	0.6258	0.4499	0.292989	0.219484	0.0439659	-0.0943605	0.0439659	-0.0943605	-0.292099	-0.0450832	-0.0600771	0.30797	0.234687	0.0200658	0.0171025	0.489364	0.11172	0.683858	0.459208	0.581147	-0.416153	-0.51246	0.670133	0.439648	-0.0067039	-0.041751	-0.182289	-0.471392	0	-0.285737	0.594683	-0.214865	-0.0686199
Latrunculin B_1.89	actin poison	-0.585804	-0.51444	-0.60228	-0.335541	-0.575603	-0.358504	-0.280021	-0.603955	-0.280021	-0.603955	-0.509754	-0.669297	-0.853679	-0.358504	-0.548582	0.438945	0.677553	0.433511	0.595248	-0.142234	-0.181229	-0.142234	-0.181229	-0.0186637	-0.162718	0.0354669	-0.176499	0.199319	-2.80263e-06	0.138742	-0.142129	-0.398798	0.105118	-0.0533734	-0.131853	-0.35254	-0.565682	0.441456	0.631375	-0.720434	-0.236538	-0.205744	-0.464219	-0.503331	-0.436003	0.0156952	-0.412685	-0.110329
Latrunculin B_0.3795	actin poison	-0.541806	-0.514303	-0.545251	-0.238254	-0.388682	-0.619297	-0.0276544	-0.527574	-0.0276544	-0.527574	-0.534099	-0.0826717	-0.424063	-0.619297	-0.480193	0.581146	0.579729	0.492833	0.129994	0.586213	0.599248	0.586213	0.599248	-0.166175	-0.362949	-0.00107761	0.128064	0.0659298	-0.115751	-0.00542279	-0.0243759	-0.107446	0.244451	-0.0828188	-0.0373834	-0.617989	-0.424188	0.599838	0.579492	-0.687027	-0.67315	-0.585221	-0.50867	-0.323476	-0.518516	0.194328	-0.521505	-0.415546
Loperamide_1.461	Calcium channels	-0.0488877	-0.0764766	0.0407295	0.0895138	0.159365	-0.363155	-0.59169	-0.538055	-0.59169	-0.538055	-0.30677	-0.489826	-0.582575	-0.363155	-0.109619	0.57795	0.280575	0.16605	0.0290165	-0.229069	-0.450602	-0.229069	-0.450602	-0.145024	-0.136932	0	-0.422373	-0.0407562	-0.33437	-0.146608	-0.0161743	-0.0161743	0.0478516	-0.00115967	-0.0161743	-0.350117	-0.14315	0.581692	0.330669	-0.679897	-0.66493	-0.166826	-0.0844078	-0.0613785	-0.572262	0.0443115	-0.530636	-0.259632
Lycorine_0.1044	Inhibits protein synthesis	-0.230405	-0.106165	-0.572208	0.0479069	-0.0418777	-0.110647	-0.406519	-0.372684	-0.406519	-0.372684	-0.282976	-0.423128	-0.405939	-0.110647	-0.107307	0.355635	0.218985	0.208645	0.287613	-0.124058	-0.170137	-0.124058	-0.170137	-0.335806	-0.102085	-0.424866	0.271749	0.0862131	-0.0480766	-0.430025	-0.209585	-0.159304	-0.094265	-0.202339	-0.2134	-0.10379	-0.0949955	0.344303	0.157597	-0.0380854	-0.0318775	-0.080204	-0.221125	-0.00348751	-0.441364	-0.157167	-0.397532	-0.439215
Lycorine_2.61	Inhibits protein synthesis	-0.139758	-0.142714	0.212238	0.29801	0.303575	0.369747	-0.642715	-0.604462	-0.642715	-0.604462	-0.168465	-0.605183	-0.592829	0.369747	0.528687	0.00177765	-0.0457115	0.359165	0.438684	-0.310368	-0.210001	-0.310368	-0.210001	0.0383449	-0.357758	0	-0.598642	-0.447495	-0.824726	-0.455202	-6.10352e-05	-6.10352e-05	-0.000976562	0.117249	-6.10352e-05	0.368671	0.530846	-0.000514984	-0.0787163	-0.328823	-0.0356579	0.142656	0.575375	-0.0105972	-0.779415	-0.161499	-0.735836	-0.259632
Lycorine_0.522	Inhibits protein synthesis	0.285641	0.186643	0.227552	0.216228	0.256149	0.333467	-0.536016	-0.533924	-0.536016	-0.533924	-0.117039	-0.462231	-0.455631	0.333467	0.506676	0.00772476	-0.102726	0	0.31736	-0.12351	-0.00840187	-0.12351	-0.00840187	0.127985	-0.177361	-0.0227108	-0.0145359	0.450031	-0.0829067	-0.0121078	-0.0825062	-0.0915394	0.0641956	0.389462	-0.0851288	0.364128	0.499517	0	-0.098362	-0.38008	-0.219379	0.230774	0.296955	-0.0547981	-0.544874	-0.0304928	-0.543251	-0.79199
MBCQ_0.4785	phosphodiesterase inhibitor	0.27118	0.282109	0.164564	-0.158489	-0.0747528	-0.0766315	-0.474493	-0.468006	-0.474493	-0.468006	-0.53989	-0.460278	-0.750553	-0.0766315	-0.0684433	-0.00137711	0.125065	0	0.0737076	-0.000829697	-0.0463657	-0.000829697	-0.0463657	-0.0210514	-0.013298	-0.0227108	0.0575047	0.0335274	-0.0829067	-0.0121078	0.105577	0.174059	0.0641956	0.0220299	0.103439	-0.0429611	-0.0882626	0	0.0646706	0.126863	-0.195454	0.0022583	0.00789261	-0.00706863	-0.544874	0.0669918	-0.543251	-0.79199
MDL-28170_1.965	protease inhibitor	-0.112828	-0.146391	-0.0520821	0.0616817	-0.0654007	-0.0836143	-0.49794	-0.535248	-0.49794	-0.535248	-0.332771	-0.400715	-0.595758	-0.0836143	0.0336914	0.00177765	0.0857506	0.0183449	0.0768681	0.404118	0.215616	0.404118	0.215616	0.237303	0.392181	0.375	0.0506687	-0.140121	0.451313	0.476931	-6.10352e-05	-6.10352e-05	-0.000976562	-0.00115967	-6.10352e-05	-0.0260201	0.0329208	-0.000514984	0.0706596	-0.271206	-0.133802	0.00752449	0.0289879	-0.0105972	-0.232052	0.0032959	-0.372311	-0.259632
MG-132_0.06315	protease inhibitor	-0.113554	-0.128408	0.484562	0.413263	0.464729	0.311209	-0.483179	-0.372684	-0.483179	-0.372684	-0.434587	-0.471712	-0.684748	0.311209	0.520638	0.178633	0.0798244	0.57803	0.442032	-0.144077	0.0309772	-0.144077	0.0309772	0.0583552	-0.102085	-0.424866	-0.153097	-0.165227	-0.180889	-0.430025	-0.0733547	-0.161745	0.388943	0.572212	0.0746059	0.370514	0.519068	0.16608	0.0754433	-0.0380854	-0.0318775	0.0227089	0.0638981	-0.00348751	-0.458942	0.381044	-0.458323	-0.741339
MG-132_1.575	protease inhibitor	-0.104586	-0.139681	0.212238	0.30155	0.384059	0.0897179	-0.642715	-0.601532	-0.642715	-0.601532	-0.512337	-0.605183	-0.833063	0.0897179	0.292114	0.0608597	-0.112118	0.314976	0.20492	-0.0403481	-0.0145664	-0.0403481	-0.0145664	0.237303	9.15527e-05	0	0.25001	0.188217	0.0407906	0.311037	-0.142151	-0.252014	-0.000976562	0.117249	-0.252014	0.0395699	0.366783	0.12466	-0.0250053	-0.532558	-0.199354	0.00752449	0.0696373	-0.0613785	-0.779415	-0.161499	-0.735836	-0.259632
MG-132_0.315	protease inhibitor	-0.118515	-0.0991431	0.227552	0.317181	0.326706	0.216646	-0.536016	-0.469715	-0.536016	-0.469715	-0.838352	-0.506176	-0.750553	0.216646	0.461754	0.00772476	-0.152897	0	0.179543	-0.0104733	0.0262241	-0.0104733	0.0262241	0.322443	-0.013298	0.21314	0.395761	0.190144	0.000387192	0.252342	-0.139147	-0.238024	-0.0705433	0.320126	-0.142258	0.272942	0.544439	0	-0.181858	-0.41902	0.154316	0.0022583	0.188068	-0.0547981	-0.544874	0.0669918	-0.543251	-0.79199
ML7_1.8	kinase inhibitor	-0.455322	-0.529122	0.0665657	-0.00581189	0.0109409	-0.544469	-0.280021	-0.603955	-0.280021	-0.603955	-0.477388	-0.619179	-0.853679	-0.544469	-0.453228	0.584593	0.501528	0.37279	0.0936438	0.166927	0.00677303	0.166927	0.00677303	0.0327541	0.117239	0.0354669	0.421791	0.193181	0.326314	0.177805	-0.418566	-0.43528	0.105118	-0.0112417	-0.410104	-0.539273	-0.567356	0.591009	0.422321	-0.720434	-0.236538	-0.426273	-0.335975	-0.503331	-0.436003	4.67106e-07	-0.412685	-0.110329
ML9_2.31	kinase inhibitor	-0.412061	-0.512991	-0.0138313	0.0827162	0.0524448	-0.661831	-0.280021	-0.603955	-0.280021	-0.603955	-0.579822	-0.59473	-0.853679	-0.661831	-0.407016	0.584279	0.578641	0.42528	0.220841	0.0549363	-0.00230875	0.0549363	-0.00230875	0.133201	0.0750022	0.0920377	0.321588	0.304474	0.365167	0.192383	-0.112483	-0.398798	0.105118	-0.0533734	-0.103254	-0.654194	-0.471095	0.614203	0.56905	-0.720434	-0.236538	-0.418391	-0.335975	-0.503331	-0.436003	4.67106e-07	-0.412685	-0.110329
MY-5445_2.265	phosphodiesterase inhibitor	-0.256915	-0.324577	-0.338459	0.15653	-0.108752	-0.286495	-0.642715	-0.601532	-0.642715	-0.601532	-0.518929	-0.605183	-0.833063	-0.286495	-0.167969	0.0608597	0.0339928	0.00857925	-0.0738163	-0.110661	-0.118326	-0.110661	-0.118326	-0.145024	-0.058197	0	-0.0993748	0.0989838	-0.187031	-0.062624	-6.10352e-05	-6.10352e-05	-0.000976562	-0.0249634	-6.10352e-05	-0.178364	-0.244713	0.12466	0.0513725	-0.679897	-0.307753	-0.128618	-0.145565	-0.0613785	-0.779415	-0.161499	-0.735836	-0.259632
Manoalide_0.36	phospholipase inhibitor	0.0390502	0.0472467	0.061016	0.271634	0.157515	0.00831806	-0.612127	-0.588784	-0.612127	-0.588784	-0.282669	-0.498332	-0.542506	0.00831806	0.0952883	-0.00755466	-0.0455495	-0.00852795	-0.0691178	-0.0752269	-0.0250638	-0.0752269	-0.0250638	-0.0382457	-0.201956	-0.11401	0.16043	0.143148	-0.00707323	-0.00542279	0.144214	0.0535608	0.0142611	0.0457094	0.131691	-0.00453311	0.132545	-0.0279905	-0.06289	-0.28584	-0.11861	-0.00434097	0.0711704	-0.323476	-0.607662	0.194328	-0.609395	-0.620136
Manumycin A_0.273	farnesylation inhibitor	-0.0952025	-0.21563	0.232751	0.391135	0.354816	0.542428	-0.621195	-0.541978	-0.621195	-0.541978	-0.0225892	-0.511233	-0.541356	0.542428	0.217359	0.141379	0.249895	0.513341	0.450333	-0.0752269	0.0103456	-0.0752269	0.0103456	0.132379	0.0596569	-0.0341064	-0.16901	0.395276	-0.0792691	0.055088	0.0673795	-0.0114291	0.0142611	0.211969	0.0466956	0.543212	0.192115	0.0879096	0.210944	-0.687027	-0.251536	0.407975	0.195682	-0.137929	-0.619241	0.194328	-0.620277	-0.868881
Manumycin A_1.362	farnesylation inhibitor	-0.457941	-0.53003	-0.0237713	-0.0872502	-0.0739291	-0.67648	-0.280021	-0.603955	-0.280021	-0.603955	-0.262265	-0.669297	-0.853679	-0.67648	-0.453228	0.662473	0.429855	0.204612	0.0763796	-0.0163272	-0.400328	-0.0163272	-0.400328	-0.292241	-0.162718	-0.26182	-0.156061	0.342141	-0.0239286	-0.0575479	-0.119947	-0.398798	0.436172	0.0723466	-0.112113	-0.673585	-0.423104	0.668855	0.31905	-0.720434	-0.236538	-0.535787	-0.335975	-0.503331	-0.436003	0.140835	-0.412685	-0.110329
Mastoparan_0.444	activates heterotrimeriuc GTPases	-0.538929	-0.53003	-0.33798	0.300001	-0.330486	-0.53296	-0.280021	-0.603955	-0.280021	-0.603955	-0.876384	-0.669297	-0.853679	-0.53296	-0.452042	0.647023	0.370285	0.479968	0.229979	-0.0636556	-0.181229	-0.0636556	-0.181229	-0.135293	-0.309656	-0.107035	-0.243882	-0.340642	-0.0239286	-0.00753395	-0.421949	-0.596761	-0.00257874	-0.0581167	-0.446306	-0.523544	-0.437194	0.66903	0.367843	-0.720434	-0.236538	-0.322164	-0.275463	-0.503331	-0.436003	-0.21031	-0.412685	-0.110329
Mead ethanolamide_0.03	cannabinoid receptor ligand	0.390298	0.382109	0.299574	-0.126019	0.225998	0.0125446	0.216436	0.175037	0.216436	0.175037	-0.0677223	0.37141	0.102726	0.0125446	-0.019371	0.00772476	0.155338	0	0.0278091	-0.000829697	0.0820103	-0.000829697	0.0820103	0.668024	0.00157928	5.72205e-06	0.259653	0.399494	0.0294399	0.038475	0.175768	0.174059	0.0641956	0.0647545	0.172043	0.0153732	0.0158749	0	-0.14658	0.11954	-0.317402	0.0022583	0.00789261	-0.0547981	0.110548	0.0669918	0.24601	0.162596
Methotrexate_0.01413	DHFR inhibitor	0.0986947	0.0618035	0.187236	0.0561352	0.166664	0.333174	-0.293927	0.0487184	-0.293927	0.0487184	0.434826	-0.525345	0.127132	0.333174	0.30319	-0.480362	-0.329308	0.0261637	0.0558162	-0.382056	0.0217983	-0.382056	0.0217983	-0.0202515	-0.174575	-0.225633	0.36986	0.224416	-0.294625	-0.407591	-0.104735	-0.0450169	-0.205825	0.0203713	-0.120074	0.298646	0.367472	-0.487973	-0.259909	0.219334	0.325444	0.358737	0.367289	0.0407859	-0.285956	-0.23217	-0.286497	-0.190192
Methotrexate_0.07065	DHFR inhibitor	-0.057307	0.0579561	0.255648	0.144556	0.264338	0.556653	-0.430738	0.0675574	-0.430738	0.0675574	0.544146	-0.481376	0.110104	0.556653	0.432507	-0.47098	-0.644201	0.0995247	0.0136386	-0.217027	0.0453231	-0.217027	0.0453231	0.0179291	-0.133532	-0.30366	0.183284	0.391391	-0.457077	-0.711613	-0.198593	-0.100197	-0.164152	0.0140347	-0.230108	0.555522	0.430289	-0.348983	-0.650202	0.0787525	0.449291	0.53999	0.465324	0	-0.368117	-0.377049	-0.370348	-0.379236
Methotrexate_1.77	DHFR inhibitor	-0.0351579	-0.0153562	0.146644	0.201194	0.0787422	0.562082	-0.0117449	-0.0128557	-0.0117449	-0.0128557	0.590669	-0.664972	0.0573621	0.562082	0.528458	-0.178343	-0.205246	0.0368176	-0.0227733	-0.252062	-0.00230875	-0.252062	-0.00230875	-0.000422886	-0.309656	-0.26182	0.400481	0.439937	-0.0239286	-0.0575479	-0.0450306	-0.0101262	-0.030899	0.0723466	-0.0392889	0.566164	0.533874	-0.208057	-0.222579	-0.146255	0.221935	0.491284	0.449571	0.0332366	-0.013291	4.67106e-07	-0.00671418	-0.110329
Methotrexate_0.354	DHFR inhibitor	0.157807	0.0883256	0.232751	0.123118	0.200414	0.519165	-0.305347	0.0474541	-0.305347	0.0474541	0.477598	-0.513957	0.195199	0.519165	0.261513	-0.127253	-0.145508	0.286639	0.0697987	-0.159386	0.120627	-0.159386	0.120627	0.0251667	-0.362949	-0.240789	0.402722	0.231632	-0.411928	-0.316667	0.144214	0.098692	-3.11404e-05	0.0457094	0.1123	0.538922	0.191975	-0.142527	-0.18646	-0.141514	0.126484	0.5358	0.229862	0.224529	-0.414337	0.0181279	-0.417117	-0.384785
Mitomycin C_0.018	Inhibits DNA synthesis	-0.123695	-0.12584	0.381746	0.213372	0.380008	0.346668	-0.78472	-0.547044	-0.78472	-0.547044	0.283369	-0.780088	-0.491215	0.346668	0.792831	-0.0588706	-0.227815	0.57834	0.382302	-0.382056	0.0946219	-0.382056	0.0946219	0.15976	-0.174575	-0.225633	0.291883	0.358554	-0.294625	-0.238088	0.0958062	0.127153	-0.0292069	0.570455	0.0718035	0.342971	0.788615	-0.0720623	-0.252236	-0.0227819	-0.044639	0.374789	0.626578	-0.00230829	-0.721364	-0.0732347	-0.722462	-0.774141
Mitomycin C_0.0897	Inhibits DNA synthesis	0.0379634	0.046713	0.556045	0.163123	0.264652	0.383208	-0.541073	-0.499995	-0.541073	-0.499995	-0.279634	-0.529262	-0.514052	0.383208	0.41322	-0.114116	-0.519759	0.426813	0.469031	-0.217027	0.135306	-0.217027	0.135306	0.195001	-0.133532	-0.30366	0.325583	0.227328	-0.457077	-0.51058	0.0105348	0.0285493	-0.0556841	0.459208	0.0125091	0.395087	0.363674	-0.140696	-0.532492	-0.0067039	0.250805	0.459494	0.46487	0	-0.480561	-0.00979147	-0.480874	-0.476962
Mitomycin C_2.25	Inhibits DNA synthesis	-0.399945	-0.50187	0.352245	0.411399	0.361666	-0.618618	-0.280021	-0.603955	-0.280021	-0.603955	-0.660424	-0.669297	-0.853679	-0.618618	-0.0608592	0.631572	0.0587613	0.109432	0.0510238	-0.252062	-0.400328	-0.252062	-0.400328	-0.0929522	-0.309656	-0.26182	-0.649469	-0.613661	-0.0239286	-0.0575479	-0.142129	-0.398798	0.105118	0.0723466	-0.191702	-0.612167	-0.0208996	0.578663	0.234961	-0.720434	-0.0243875	-0.465405	-0.0615266	-0.150014	-0.436003	4.67106e-07	-0.412685	-0.110329
Mitomycin C_0.4485	Inhibits DNA synthesis	0.0390502	0.0674544	0.232333	0.176086	0.308255	0.633144	-0.6198	-0.589063	-0.6198	-0.589063	-0.872687	-0.555804	-0.832092	0.633144	0.376538	-0.299059	-0.488176	0.0716209	0.132526	-0.159386	-0.0250638	-0.159386	-0.0250638	-0.0382457	-0.362949	-0.240789	-0.36631	-0.220192	-0.411928	-0.316667	-0.0243759	-0.0114291	-3.11404e-05	0.125299	-0.0373834	0.631556	0.405598	-0.213398	-0.413615	-0.183361	0.04588	0.543543	0.538281	0.153554	-0.619241	-0.0294281	-0.620277	-0.868881
Monastrol_2.565	Eg5 inhibitor	-0.227564	-0.223658	-0.0138313	0.127045	0.0109409	-0.129465	-0.280021	-0.354792	-0.280021	-0.354792	-0.636428	-0.0221153	-0.518509	-0.129465	-0.0107755	0.00618853	-0.00707323	-0.0351435	-0.000940128	-0.000248812	0.0424873	-0.000248812	0.0424873	0.234344	0.0234537	0.335237	0.219991	-0.0189341	0.209475	0.393416	-0.0450306	-0.110991	0.00550842	0.000359983	-0.0392889	-0.112934	0.0124593	0.00242116	-0.0116417	-0.105647	0.140894	-0.0954275	-0.000840168	-0.0436678	-0.436003	4.67106e-07	-0.412685	-0.110329
Monensin_0.216	Na+ ionophore	-0.21096	-0.272735	-0.352032	-0.1444	-0.0650208	-0.284127	-0.612127	-0.589063	-0.612127	-0.589063	-0.390684	-0.513782	-0.589486	-0.284127	-0.23839	0.141379	0.368059	-0.00852795	-0.0691178	-0.0752269	-0.174269	-0.0752269	-0.174269	-0.166175	-0.201956	-0.11401	0.242496	0.260998	-0.0792691	-0.00542279	-0.0278985	-0.107446	-3.11404e-05	-0.0828188	-0.0452657	-0.369802	-0.220505	0.149433	0.32569	-0.461922	-0.416725	-0.152813	-0.295222	-0.137929	-0.607662	-0.0294281	-0.609395	-0.620136
Monensin_1.083	Na+ ionophore	-0.296811	-0.376311	-0.287966	0.0827162	-0.0216831	-0.414447	-0.280021	-0.370208	-0.280021	-0.370208	-0.562593	-0.571501	-0.370839	-0.414447	-0.294223	0.300622	0.183936	0.0368176	0.010357	-0.000248812	-0.00230875	-0.000248812	-0.00230875	-0.0186637	-0.162718	-0.128589	0.256124	0.259169	0.022952	-0.00753395	-0.112483	-0.192395	-0.030899	-0.0533734	-0.131853	-0.518451	-0.257402	0.453872	0.168206	-0.40068	-0.236538	-0.129293	-0.173238	-0.234197	-0.436003	4.67106e-07	-0.412685	-0.110329
Mycophenolic acid_0.0207	Inhibits DNA synthesis	0.052614	0.0392389	0.0887426	0.0594959	0.197879	0.0937417	-0.78472	-0.554578	-0.78472	-0.554578	-0.837603	-0.780088	-0.788613	0.0937417	0.185096	0.100723	0.0501855	0.164522	0.206939	0.103945	0.0726842	0.103945	0.0726842	0.0780082	0.00172331	-0.000256441	0.384254	0.0760132	0.00500473	0.00127162	-0.164758	-0.108912	-0.114796	-0.0259865	-0.155997	0.0954163	0.161662	0.0872339	0.0430072	-0.0227819	-0.0149951	0.179712	0.194612	0.0407859	-0.721364	-0.166531	-0.722462	-0.774141
Mycophenolic acid_0.10335	Inhibits DNA synthesis	0.184332	0.219688	0.385496	0.199663	0.336151	0.353144	-0.541073	-0.552666	-0.541073	-0.552666	-0.849702	-0.404262	-0.764052	0.353144	0.448342	-0.198972	0.18846	0.132763	0.137243	-0.217027	0.111904	-0.217027	0.111904	0.189978	-0.133532	-0.30366	0.500876	0.370081	-0.144577	-0.356423	-0.286274	-0.170868	-0.326192	0.0586078	-0.328915	0.390414	0.463318	-0.229215	-0.248905	0.0286068	0.179202	0.389739	0.456535	0	-0.480561	-0.262303	-0.480874	-0.508492
Mycophenolic acid_2.58	Inhibits DNA synthesis	0.0277731	0.0388111	0.146644	0.353468	0.345135	0.608295	-0.280021	-0.603955	-0.280021	-0.603955	-0.876384	-0.669297	-0.853679	0.608295	0.480642	-0.218696	-0.141874	0.0368176	0.010357	-0.252062	-0.0290945	-0.252062	-0.0290945	0.168147	-0.309656	-0.0422331	0.216085	0.478128	-0.0239286	0.048131	-0.112483	-0.110991	-0.030899	0.0723466	-0.103254	0.608504	0.476954	-0.208057	-0.158579	-0.202557	0.274693	0.352473	0.299738	-0.117009	-0.436003	4.67106e-07	-0.412685	-0.110329
Mycophenolic acid_0.516	Inhibits DNA synthesis	0.0857159	0.0778333	0.232333	0.178879	0.292944	0.542428	-0.6198	-0.589063	-0.6198	-0.589063	-0.872687	-0.439664	-0.832092	0.542428	0.31913	-0.418827	-0.25694	0.0198631	0.0383218	-0.159386	-0.00207971	-0.159386	-0.00207971	-0.0397105	-0.362949	-0.240789	0.27728	0.37114	-0.240402	-0.316667	-0.0243759	-0.0114291	-3.11404e-05	0.0457094	-0.00923748	0.66891	0.359665	-0.246671	-0.29015	-0.299894	0.112788	0.543543	0.299686	-0.0591759	-0.619241	-0.00034052	-0.620277	-0.868881
N-Linoleoylglycine_0.03	cannabinoid receptor ligand	0.207394	0.234744	0.227552	-0.126019	0.205368	-0.0240192	-0.488653	-0.456532	-0.488653	-0.456532	-0.493137	-0.454174	-0.442204	-0.0240192	0.0201035	0.00772476	0.125065	0	0.0278091	0.138159	0.387186	0.138159	0.387186	0.127985	0.656609	-0.0227108	-0.217661	0.0335274	0.342916	-0.0121078	0.0589466	0.0702991	0.0641956	0.0647545	0.0599823	0.0153732	0.0158749	0.25	0.113621	-0.384706	-0.137104	-0.00897217	0.00789261	0.193348	-0.510206	0.0669918	-0.512001	-0.437742
N9-Isopropylolomoucine_2.295	kinase inhibitor	-0.0351579	-0.0700262	0.146644	0.422351	0.225087	0.489677	-0.280021	-0.416874	-0.280021	-0.416874	-0.562593	-0.604635	-0.853679	0.489677	0.478758	0.153196	0.0293947	0.573787	0.339947	-0.000248812	0.0666572	-0.000248812	0.0666572	0.133201	-0.00946792	-0.00275203	0.493324	0.417337	0.0927762	0.138742	0.0301729	0.0342613	0.105118	0.0723466	0.0348944	0.502547	0.38725	0.242935	0.0224536	-0.407096	0.210631	0.329942	0.271697	-0.0129939	-0.436003	4.67106e-07	-0.412685	-0.110329
N;N-Dimethylsphingosine_0.15	Sphingosine kinase inhibitor	-0.256915	-0.324577	-0.338459	-0.1724	-0.145701	-0.5238	-0.0579987	-0.447601	-0.0579987	-0.447601	-0.518929	0.346394	-0.5086	-0.5238	-0.348877	0.57795	0.280575	0.0183449	-0.0738163	-0.057682	-0.465372	-0.057682	-0.465372	-0.269779	-0.211029	0	-0.040781	0.152939	-0.369892	-0.0255146	-6.10352e-05	-6.10352e-05	0.00878906	-0.0249634	-6.10352e-05	-0.512226	-0.415123	0.581692	0.330669	-0.679897	-0.375257	-0.376909	-0.314388	-0.0613785	-0.129757	0.0443115	-0.196285	-0.259632
NS-1619_0.0165	Potassium channels	0.249348	0.265955	0.169722	-0.327831	-0.173416	-0.0763893	0.397608	0.319628	0.397608	0.319628	0.058033	0.419456	0.277695	-0.0763893	-0.0756378	0.0610466	0.21299	0.026619	0.0971889	3.8147e-06	-0.0586853	3.8147e-06	-0.0586853	-0.231987	0.0112991	-0.0651226	0.041975	-0.0175552	0.0209351	-0.12009	0.228985	0.231	0.149375	-0.0401211	0.156979	-0.0535736	-0.0743866	0.0708961	0.146486	-0.00444794	-0.0466113	-0.0203438	-0.076973	-0.00346021	0.305105	0.212126	0.296875	0.436422
NS-1619_2.07	Potassium channels	-0.229525	-0.263057	-0.247761	0.12528	-0.0295857	-0.581905	-0.642715	-0.599579	-0.642715	-0.599579	-0.547005	-0.555378	-0.833063	-0.581905	-0.368042	0.619942	0.536068	0.447666	0.508509	-0.38361	-0.59379	-0.38361	-0.59379	-0.461568	-0.551361	0	-0.352915	-0.41539	-0.824726	-0.455202	-0.252014	-0.252014	-0.000976562	-0.305237	-0.252014	-0.571064	-0.415123	0.634304	0.53709	-0.679897	-0.66493	-0.489824	-0.433163	-0.0613785	-0.779415	-0.161499	-0.735836	-0.259632
NSC-95397_0.0966	phosphatase inhibitor	0.0664637	-0.314224	0.508577	0.111284	0.252445	0.0176602	-0.400116	-0.410382	-0.400116	-0.410382	0.35734	-0.482352	-0.345142	0.0176602	-0.303706	0.177244	0.492729	0.419977	0.354598	0.0195518	-0.00591185	0.0195518	-0.00591185	-0.363737	0.179361	-0.158431	-0.443782	-0.0445016	0.0122533	-0.188733	0.356866	-0.104571	0.511983	0.567048	0.425595	0.00341579	-0.322065	0.249827	0.508496	-0.0067039	-0.00628086	0.111977	-0.13413	0	-0.407738	0.469683	-0.357652	-0.314574
NapSul-Ile-Trp-CHO_1.53	protease inhibitor	-0.194844	-0.201231	-0.0520821	0.301672	0.331853	-0.282223	-0.642715	-0.601532	-0.642715	-0.601532	-0.49366	-0.605183	-0.592829	-0.282223	-0.0324707	0.593086	0.0857506	0.514683	0.0252323	-0.0637856	-0.226969	-0.0637856	-0.226969	0.0383449	9.15527e-05	0	-0.284189	0.056015	-0.187031	0.0474873	-0.0635376	-0.252014	-0.000976562	-0.0249634	-0.0635376	-0.26955	-0.0700302	0.594753	0.0655327	-0.679897	-0.42494	-0.0628223	0.00420761	-0.0613785	-0.779415	0.0032959	-0.735836	-0.259632
Nicardipine_1.4535	Calcium channels	-0.152319	-0.155153	-0.128986	0.104284	0.129034	-0.282223	-0.583389	-0.601532	-0.583389	-0.601532	-0.502083	-0.562702	-0.592829	-0.282223	-0.090332	0.137276	-0.0105553	0.0183449	-0.0902958	-0.057682	-0.226969	-0.057682	-0.226969	-0.129521	-0.551361	0	0.452524	0.019516	-0.22707	-0.0255146	-6.10352e-05	-6.10352e-05	-0.000976562	-0.0249634	-6.10352e-05	-0.26955	-0.0970078	0.12466	-0.0025444	-0.679897	-0.0464001	-0.128618	0.00420761	-0.0613785	-0.779415	0.0032959	-0.735836	-0.259632
Nifedipine_0.01725	Calcium channels	0.151676	0.0994726	0.12895	-0.111034	-0.0642853	-0.0995827	0.541529	0.488939	0.541529	0.488939	0.114063	0.472069	0.413925	-0.0995827	-0.0166779	0.0275993	0.0810318	-0.0727615	0.0853481	3.8147e-06	-0.0865173	3.8147e-06	-0.0865173	-0.00554657	-0.0407181	-0.00213432	0.0396557	-0.0203629	-0.0172729	-0.0215797	0.0643406	0.0602582	0.041348	-0.0401211	0.0435602	-0.0727386	-0.050705	0.0235329	0.112673	0.0289841	-0.111409	-0.0420723	-0.028389	-0.00346021	0.387869	0.218866	0.393555	0.338156
Nifedipine_2.16	Calcium channels	-0.164451	-0.211097	0.260212	0.201941	0.199623	-0.147823	-0.642715	-0.554169	-0.642715	-0.554169	-0.557259	-0.605183	-0.833063	-0.147823	0.0567627	0.435982	0.110165	0.302036	0.364588	-0.194889	-0.354654	-0.194889	-0.354654	0.0426954	0.590668	0	-0.551279	0.172714	-0.255512	-0.062624	-0.0635376	-0.252014	-0.000976562	0.00860596	-0.0635376	-0.179707	0.0756454	0.435452	0.215679	-0.679897	-0.193495	-0.0143604	0.0863609	-0.0613785	-0.779415	0.0443115	-0.735836	-0.259632
Nifedipine_0.4335	Calcium channels	-0.257945	-0.269854	-0.12892	-0.126019	-0.147141	0.0125446	-0.52088	-0.507557	-0.52088	-0.507557	-0.540012	-0.367504	-0.457462	0.0125446	0.0201035	0.00772476	-0.107975	0	-0.0776138	-0.000829697	-0.00840187	-0.000829697	-0.00840187	-0.0210514	-0.0718918	-0.0227108	0.3556	-0.00264359	-0.0182095	-0.0121078	-0.139147	-0.140856	-0.0705433	-0.081356	-0.142258	0.0107346	0.0278378	0	-0.141209	-0.199841	0.197041	0.0022583	0.00789261	-0.00706863	-0.510206	-0.108496	-0.512001	-0.511717
Niflumic acid_0.10635	Misc. channels	0.307365	0.181287	0.268742	-0.155451	-0.0610428	-0.125784	0.380884	0.335331	0.380884	0.335331	0.0686207	0.430086	0.296442	-0.125784	-0.0599442	0.0215282	0.116568	0.026516	0.0382233	-0.0205421	-0.0749226	-0.0205421	-0.0749226	-0.0802915	-0.00174332	0.000549316	0.0265102	-0.0573222	-0.0480766	-0.00338936	0.285025	0.2334	0.128567	0.023262	0.291159	-0.0908508	-0.0687504	-0.0213051	0.109501	-0.0380854	-0.0318775	-0.0688515	-0.0358219	-0.00348751	0.371784	0.219912	0.371775	0.471563
Niflumic acid_2.655	Misc. channels	-0.152319	-0.195165	-0.0721016	0.0679073	-0.0330171	-0.0784874	-0.626114	-0.55014	-0.626114	-0.55014	-0.519661	-0.438313	-0.534235	-0.0784874	-0.0108643	0.00177765	-0.106869	-0.0300636	-0.0744267	-0.0359535	-0.118326	-0.0359535	-0.118326	-0.0598522	-0.058197	0.0234375	0.0227146	-0.116684	-0.153584	-0.0255146	-6.10352e-05	-6.10352e-05	-0.000976562	-0.0249634	-6.10352e-05	-0.0794868	-0.0208359	-0.000514984	-0.0839653	0.0714989	0.187269	-0.225664	-0.00579453	-0.0105972	-0.411983	-0.161499	-0.735836	-0.259632
Nigericin_0.0414	induces intracellular acidification	-0.177249	-0.158034	-0.256901	0.193171	0.23243	0.0168972	-0.456812	-0.342167	-0.456812	-0.342167	-0.0680103	-0.412874	-0.355158	0.0168972	0.0101395	0.0253124	-0.0891018	0.026516	-0.0769196	-0.00296402	0.0146198	-0.00296402	0.0146198	-0.148521	-0.0284767	-0.126038	0.22463	0.00545331	-0.0129204	-0.123751	-0.0956936	-0.144899	-0.0499535	-0.0239944	-0.101706	0.0144348	-0.0200443	-0.014225	-0.103397	-0.00429246	-0.0318775	0.00683975	0.0167789	-0.00348751	-0.38216	-0.228212	-0.439768	-0.432257
Nigericin_0.207	induces intracellular acidification	-0.251327	-0.22304	-0.12892	0.335613	0.205368	-0.0378132	-0.536016	-0.483631	-0.536016	-0.483631	-0.377171	-0.460278	-0.430363	-0.0378132	0.329674	0.00772476	-0.0813637	0	0.113014	-0.226904	-0.128641	-0.226904	-0.128641	-0.0210514	-0.329704	-0.0227108	-0.450327	-0.379108	-0.194479	-0.0121078	-0.139147	-0.238024	-0.0705433	0.0647545	-0.142258	-0.0429611	0.29273	0.25	-0.0813942	-0.481765	-0.139668	-0.00897217	0.188068	-0.0547981	-0.544874	-0.108496	-0.543251	-0.79199
Nigericin_1.035	induces intracellular acidification	-0.307037	-0.392714	-0.338459	0.153845	-0.0440772	-0.3092	-0.642715	-0.599579	-0.642715	-0.599579	-0.667122	-0.555378	-0.833063	-0.3092	-0.090332	0.656807	0.558163	0.451084	0.523767	-0.310368	-0.354654	-0.310368	-0.354654	-0.129521	-0.551361	0	0.290171	-0.239853	-0.665668	-0.455202	-0.0161743	-0.0635376	-0.000976562	-0.0249634	-0.0635376	-0.295673	-0.0970078	0.684597	0.537212	-0.679897	-0.66493	-0.0628223	0.0195885	-0.0613785	-0.779415	0.0443115	-0.735836	-0.259632
Nimodipine_1.785	Calcium channels	-0.164022	-0.168879	-0.239216	-0.120153	-0.102135	-0.119991	-0.494766	-0.446259	-0.494766	-0.446259	-0.104378	-0.50655	-0.511896	-0.119991	-0.090332	0.00177765	-0.112118	-0.082798	-0.138025	-0.057682	-0.210001	-0.057682	-0.210001	-0.0598522	-0.111176	0	0.0366306	0.0771332	-0.154682	-0.00158882	-6.10352e-05	-6.10352e-05	-0.000976562	-0.0249634	-6.10352e-05	-0.1133	-0.0700302	-0.000514984	-0.0787163	-0.172329	0.126478	-0.0249805	0.00420761	-0.0105972	-0.232052	-0.00915527	-0.196285	-0.259632
Nitrendipine_2.085	Calcium channels	-0.194844	-0.324577	0.431232	0.384558	0.331853	-0.0836143	-0.480728	-0.464203	-0.480728	-0.464203	-0.0455399	-0.565266	-0.426447	-0.0836143	0.050415	0.437202	0.531185	0.315098	0.47555	0.367496	0.31193	0.367496	0.31193	0.485251	0.36264	0.882812	-0.0327244	-0.472031	0.425638	0.52112	-6.10352e-05	-6.10352e-05	0.264648	0.451111	-6.10352e-05	-0.178364	0.0329208	0.487453	0.541973	-0.679897	-0.521498	-0.0249805	0.0195885	-0.0613785	-0.29858	0.0443115	-0.26086	-0.259632
Nocodazole_0.01995	microtubule poison	0.103496	-0.156584	0.357332	0.170643	0.239767	0.0409725	-0.78472	-0.49131	-0.78472	-0.49131	-0.524336	-0.467588	-0.530801	0.0409725	-0.0845795	0.609233	0.381554	0.585246	0.400054	0.487385	0.454381	0.487385	0.454381	0.416534	0.68434	0.558331	-0.365041	-0.346033	0.505423	0.488181	-0.180418	-0.426609	0.574338	0.497248	0.135594	0.0902894	-0.0885591	0.606765	0.388187	-0.0227819	-0.111879	0.341508	0.0748434	-0.00230829	-0.721364	0.0676544	-0.722462	-0.774141
Nocodazole_0.0996	microtubule poison	0.0256205	-0.0325982	0.513704	0.218322	0.406184	0.351156	-0.414676	-0.410382	-0.414676	-0.410382	-0.408505	-0.398786	-0.341061	0.351156	0.273223	0.52082	0.464723	0.637332	0.457382	0.492208	0.464303	0.492208	0.464303	0.375002	0.572427	0.685077	-0.0838145	-0.177802	0.451916	0.420423	-0.813897	-0.749429	-0.893261	-0.576116	-0.840355	0.373986	0.345852	0.546598	0.424407	-0.0067039	-0.00628086	0.389739	0.431528	0	-0.43128	-0.889326	-0.431697	-0.345161
Nocodazole_2.49	microtubule poison	0.0297459	-0.0866812	0.621846	0.353468	0.409448	0.0841597	-0.166077	-0.233384	-0.166077	-0.233384	-0.0896927	-0.45271	-0.370839	0.0841597	0.135741	0.576536	0.486147	0.538771	0.628137	0.129155	0.208747	0.129155	0.208747	0.307412	0.615111	0.386018	-0.0255155	-0.39226	0.489888	0.467913	-0.0450306	-0.192395	0.0257721	0.104782	-0.0600757	0.0369364	0.158281	0.709452	0.496679	-0.424292	-0.236538	0.0365548	0.161241	-0.271985	-0.260013	-0.0777767	-0.24088	-0.110329
Nocodazole_0.498	microtubule poison	0.074346	0.0109338	0.545251	0.279028	0.48857	0.0532399	-0.354454	-0.383008	-0.354454	-0.383008	0.211136	-0.450191	-0.250479	0.0532399	0.193712	0.559591	0.576834	0.555473	0.537292	0.277131	0.615152	0.277131	0.615152	0.506612	0.694143	0.686101	-0.0227694	-0.230132	0.663323	0.549194	-0.0243759	-0.0942974	-3.11404e-05	0.0457094	-0.0373834	0.0571628	0.132196	0.593141	0.578899	-0.687027	-0.356948	0.0957891	0.195682	-0.207265	-0.341409	-0.0294281	-0.34398	-0.189821
OBAA_1.755	phospholipase inhibitor	-0.0343548	-0.235127	-0.000159439	0.0220996	0.0524448	-0.537389	-0.0117449	-0.143227	-0.0117449	-0.143227	-0.469541	0.159462	-0.0970176	-0.537389	-0.587715	0.300622	0.578641	-0.00445152	0.0510238	0.0119676	-0.0290945	0.0119676	-0.0290945	-0.0401829	0.00315514	-0.26182	0.0647873	0.259169	-2.80263e-06	-0.00753395	0.00387542	-0.0449337	0.105118	-0.0533734	0.0051092	-0.573383	-0.567356	0.281997	0.56905	-0.248742	-0.236538	-0.418391	-0.464219	-0.503331	-0.013291	4.67106e-07	-0.00671418	-0.000674501
OBAA_0.3495	phospholipase inhibitor	-0.05757	-0.0637097	-0.0221628	0.126112	-0.0502677	-0.498343	0.0831441	-0.12108	0.0831441	-0.12108	-0.282669	0.297563	-0.145569	-0.498343	-0.23839	0.141379	0.368373	-0.0984415	-0.0380948	0.0102506	-0.0435487	0.0102506	-0.0435487	-0.0233531	-0.000226079	-0.0341064	-0.0553447	0.0362144	-0.00707323	-0.067295	0.021795	-0.0114291	-3.11404e-05	-0.0266664	0.0123416	-0.489187	-0.266438	0.149433	0.32569	-0.13721	-0.357804	-0.264804	-0.193241	-0.0591759	0.0293624	0.194328	0.0289335	0.00643656
Okadaic acid_0.00372	phosphatase inhibitor	-0.0189428	-0.0880451	0.0514765	0.048679	-0.0415776	-0.0934484	-0.541073	-0.505895	-0.541073	-0.505895	-0.537132	-0.362619	-0.506239	-0.0934484	-0.346116	0.344515	0.490532	0.322286	0.261685	0.43759	0.440343	0.43759	0.440343	0.399017	0.54892	0.513202	-0.150953	-0.125068	0.451916	0.529833	0.1611	-0.129702	0.526213	0.507408	0.362084	-0.0686013	-0.246835	0.330742	0.383636	0.0286068	-0.00628086	0.0123674	-0.211766	0	-0.480561	0.482169	-0.480874	-0.476962
Oligomycin A_0.00759	Fo ATP synthase inhibitor	-0.0912401	-0.0936995	-0.109878	0.0437312	0.0922011	0.20214	-0.399117	-0.284628	-0.399117	-0.284628	-0.0767914	-0.406623	-0.309888	0.20214	0.00662885	-0.253102	-0.163885	-0.0283261	-0.256639	-0.00328905	0.0726842	-0.00328905	0.0726842	-0.00148758	-0.0700827	-0.028507	0.238164	-0.0328003	0.00500473	-0.014525	-0.28376	-0.283856	-0.224694	-0.181365	-0.271894	0.206605	0.0210019	-0.269921	-0.117505	0.0485762	0.136547	0.151427	0.0110181	0.0407859	-0.355223	-0.298472	-0.356286	-0.324469
Oligomycin A_0.189	Fo ATP synthase inhibitor	-0.05757	-0.0534792	0.0841745	0.172123	0.224166	0.00831806	-0.6198	-0.587109	-0.6198	-0.587109	-0.435745	-0.55748	-0.585719	0.00831806	0.193712	0.493604	0.112897	0.492833	0.204113	0.0102506	0.294874	0.0102506	0.294874	0.303173	0.288661	0.211422	-0.021444	-0.0663832	0.387409	0.210571	-0.0243759	-0.0114291	-3.11404e-05	0.0457094	-0.00923748	0.0178213	0.221412	0.435217	0.0925357	-0.35672	-0.157245	-0.00434097	0.0814243	-0.127849	-0.619241	-0.0294281	-0.620277	-0.650759
Oligomycin A_0.948	Fo ATP synthase inhibitor	-0.259686	-0.260922	0.146644	0.50637	0.345135	0.109132	-0.280021	-0.603955	-0.280021	-0.603955	-0.586205	-0.669297	-0.853679	0.109132	0.478758	0.153196	-0.109752	0.377917	0.0763796	-0.000248812	-0.00230875	-0.000248812	-0.00230875	0.133201	-0.309656	-0.0422331	0.348165	0.374403	-2.80263e-06	0.138742	0.00387542	0.00656875	0.105118	0.0723466	0.0051092	0.0972391	0.495369	0.135931	-0.12583	-0.313276	-0.236538	0.00439796	0.271697	-0.103715	-0.436003	4.67106e-07	-0.412685	-0.110329
Olomoucine_2.52	kinase inhibitor	-0.259686	-0.376311	0.146644	0.545188	0.345135	0.482562	-0.166077	-0.143227	-0.166077	-0.143227	0.0345169	-0.547994	-0.248315	0.482562	0.464075	0.023941	-0.109752	0.573787	0.0763796	-0.000248812	0.0424873	-0.000248812	0.0424873	0.331791	0.00315514	0.0920377	0.204715	0.353232	0.209475	0.270508	-0.112483	-0.192395	0.105118	0.0723466	-0.103254	0.492503	0.476954	0.0601779	-0.12583	-0.471132	0.0421249	0.329942	0.271697	-0.118764	-0.436003	4.67106e-07	-0.412685	-0.110329
Ouabain_0.01026	Na+K+ATPase inhibitor	-0.236753	-0.239352	-0.126131	0.234531	0.285351	0.243818	-0.565691	-0.501669	-0.565691	-0.501669	-0.524336	-0.780088	-0.788613	0.243818	0.247491	0.304685	-0.0968164	0.42638	0.145032	-0.382056	-0.00216239	-0.382056	-0.00216239	-0.211937	-0.174575	-0.225633	-0.595383	-0.472916	-0.294625	-0.407591	-0.350619	-0.347821	-0.205825	-0.0259865	-0.343916	0.241552	0.216524	0.203968	-0.180144	-0.00281857	-0.0165227	0.245805	0.135146	-0.00230829	-0.721364	-0.298472	-0.722462	-0.774141
Ouabain_0.0513	Na+K+ATPase inhibitor	-0.134542	-0.168536	0.162735	0.325918	0.404231	0.412052	-0.541213	-0.505826	-0.541213	-0.505826	-0.849702	-0.482387	-0.764052	0.412052	0.494972	0.447752	0.264423	0.558962	0.509558	-0.385274	-0.00591185	-0.385274	-0.00591185	-0.143313	-0.133532	-0.30366	-0.555564	-0.819997	-0.457077	-0.711613	-0.512069	-0.395353	-0.454087	-0.0858818	-0.507522	0.285921	0.419163	0.378873	0.123591	-0.0067039	-0.0176857	0.293617	0.326059	0	-0.480561	-0.53867	-0.480874	-0.594569
Ouabain_0.2565	Na+K+ATPase inhibitor	-0.21096	-0.21563	0.142629	0.323275	0.292944	0.391689	-0.6198	-0.540723	-0.6198	-0.540723	-0.575498	-0.555804	-0.832092	0.391689	0.394082	0.240953	-0.0455495	0.466222	0.349923	-0.159386	-0.0250638	-0.159386	-0.0250638	0.17343	-0.362949	-0.240789	-0.541045	-0.556966	-0.411928	-0.316667	-0.0626711	-0.0942974	-3.11404e-05	0.0698793	-0.0452657	0.323555	0.405598	0.149433	-0.07283	-0.314235	-0.23084	0.188772	0.349491	-0.207265	-0.619241	-0.0294281	-0.620277	-0.868881
Ouabain_1.2825	Na+K+ATPase inhibitor	-0.226062	-0.191919	0.146644	0.424478	0.345135	0.252826	-0.280021	-0.603955	-0.280021	-0.603955	-0.876384	-0.669297	-0.853679	0.252826	0.581367	0.595893	0.0293947	0.538771	0.567451	-0.252062	-0.0871302	-0.252062	-0.0871302	0.133201	-0.309656	-0.26182	-0.610232	-0.863661	-0.0239286	-0.0575479	0.0301729	0.00656875	0.105118	0.168468	0.0348944	0.175992	0.558148	0.453872	0.0224536	-0.471132	-0.126482	0.00439796	0.359029	-0.271985	-0.436003	4.67106e-07	-0.412685	-0.110329
PAF C16_0.0012	PAF receptor ligand	0.249348	0.265955	0.155684	-0.232006	-0.159988	-0.072361	0.478418	0.366869	0.478418	0.366869	0.0784187	0.419823	0.364975	-0.072361	-0.108841	0.0610466	0.142555	-0.0261307	-0.0239468	3.8147e-06	-0.0569763	3.8147e-06	-0.0569763	-0.159966	-0.0230179	-0.0579205	-0.0248852	-0.0983658	-0.00445557	-0.139988	0.232233	0.2166	0.180993	-0.0401211	0.224626	-0.0727386	-0.104904	0.0315895	0.109011	-0.00444794	-0.0286885	-0.015583	-0.0853958	-0.00346021	0.412039	0.198584	0.402222	0.487204
PAF C18:1_0.006	PAF receptor ligand	-0.114167	0.12179	-0.103458	-0.200983	-0.341927	-0.110647	0.408838	0.294682	0.408838	0.294682	0.129412	0.435579	0.276789	-0.110647	-0.107307	0.0215282	0.116568	-0.0145531	-0.0523834	-0.0205421	-0.0749226	-0.0205421	-0.0749226	-0.155782	-0.00174332	-0.0147095	-0.0444546	-0.152727	-0.0480766	-0.155489	0.190298	0.2334	0.00808334	-0.0712357	0.192648	-0.14798	-0.152491	0.0205727	0.109501	-0.00429246	-0.0318775	-0.0688515	-0.121027	-0.00348751	0.39864	0.231142	0.317698	0.43067
PAF C18:1_0.03	PAF receptor ligand	-0.353043	-0.33603	-0.108778	-0.158489	-0.10527	-0.396212	-0.437506	-0.484486	-0.437506	-0.484486	-0.538914	-0.165356	-0.4538	-0.396212	0.0301132	0.610752	-0.0912514	0.25	-0.0776138	0.71372	0.618387	0.71372	0.618387	-0.0210514	0.690056	0.0241756	-0.563242	-0.00264359	0.693014	-0.0121078	-0.0825062	-0.0915394	-0.0705433	-0.0303307	-0.0851288	-0.484612	-0.035162	0.671875	-0.0813942	-0.513015	0.164326	-0.216614	0.00789261	-0.00706863	-0.481642	0.0669918	-0.480019	-0.488279
PCA 4248_2.07	bioactive lipid	-0.412061	-0.465347	-0.0354901	0.201194	-0.000686957	-0.537947	-0.280021	-0.603955	-0.280021	-0.603955	-0.555583	-0.664972	-0.853679	-0.537947	-0.157853	0.264699	0.0293947	0.00500955	-0.0758564	-0.000248812	-0.0871302	-0.000248812	-0.0871302	-0.0186637	-0.0626557	-0.26182	0.158607	0.0869099	-0.0239286	-0.0575479	-0.112483	-0.110991	0.0396881	-0.0533734	-0.103254	-0.505512	-0.176243	0.242935	0.00142265	-0.463145	-0.236538	-0.194409	-0.0615266	-0.150014	-0.436003	4.67106e-07	-0.412685	-0.110329
PCA 4248_0.4155	bioactive lipid	-0.21096	-0.21563	-0.10831	0.0813758	-0.0770186	0.00831806	0.198274	0.255427	0.198274	0.255427	0.033157	0.0600372	0.105913	0.00831806	0.0952883	0.0730541	-0.145508	0.183716	-0.0691178	0.277131	0.612013	0.277131	0.612013	0.0251667	-0.000226079	-0.0341064	0.0348718	0.132859	0.0851285	-0.0129214	-0.0626711	-0.107446	-3.11404e-05	0.0457094	-0.0452657	0.0178213	0.107886	0.0879096	-0.18646	-0.170712	0.054836	0.0340564	0.0711704	-0.0360523	-0.0214453	-0.0294281	-0.0217488	-0.0204223
PD 98059_2.805	kinase inhibitor	-0.226062	-0.327568	-0.0138313	0.127045	0.0524448	-0.129465	-0.280021	-0.370208	-0.280021	-0.370208	-0.588716	-0.283834	-0.518509	-0.129465	-0.0107755	0.00618853	-0.00707323	-0.00445152	-0.0227733	-0.0163272	-0.0290945	-0.0163272	-0.0290945	0.0134321	-0.162718	0.0354669	0.107372	0.222861	-2.80263e-06	0.0861472	0.00387542	-0.0101262	0.105118	0.0207283	-0.00657405	-0.112934	-0.0129475	0.0156745	0.00142265	-0.200279	-0.138712	-0.0954275	0.017372	-0.0953263	-0.436003	4.67106e-07	-0.412685	-0.110329
PD 98059_0.561	kinase inhibitor	-0.369372	-0.340194	-0.10831	0.173284	-0.0770186	-0.0058069	-0.612127	-0.588784	-0.612127	-0.588784	-0.558931	-0.254302	-0.589486	-0.0058069	0.0400079	-0.127253	-0.302769	-0.0984415	-0.198587	-0.159386	-0.0435487	-0.159386	-0.0435487	-0.0382457	-0.0205944	0.0149239	0.0280707	0.0634535	-0.00707323	-0.00542279	-0.225966	-0.334392	-3.11404e-05	-0.0017641	-0.256412	-0.00453311	0.087518	-0.0279905	-0.300055	-0.0609096	0.0752969	-0.00434097	0.0252022	-0.0214039	-0.5385	-0.0294281	-0.540548	-0.571308
PP1_0.5325	kinase inhibitor	-0.21096	-0.246566	-0.0496112	0.114267	-0.0770186	-0.177263	-0.567519	-0.526423	-0.567519	-0.526423	-0.191918	-0.39642	-0.589486	-0.177263	-0.141187	0.432848	0.177978	0.0842464	0.0383218	-0.0223182	-0.174269	-0.0223182	-0.174269	-0.0397105	-0.000226079	-0.0341064	-0.185332	0.184687	-0.115751	-0.0129214	-0.0243759	-0.0942974	-3.11404e-05	-0.0266664	-0.00923748	-0.274099	-0.118663	0.409303	0.212653	-0.551037	-0.300454	-0.152813	-0.12251	-0.0585133	-0.500589	0.194328	-0.50295	-0.435322
PP2_0.4965	kinase inhibitor	-0.127987	-0.282207	-0.10831	0.189983	-0.0770186	-0.284127	-0.572053	-0.589063	-0.572053	-0.589063	-0.558931	-0.435482	-0.589068	-0.284127	-0.153882	0.257241	0.112897	0.0716209	-0.0380948	-0.0223182	-0.0546746	-0.0223182	-0.0546746	-0.087318	-0.0878377	-0.0341064	0.0467649	0.132859	-0.0792691	-0.00542279	-0.0278985	-0.107446	-3.11404e-05	-0.0828188	-0.0452657	-0.169921	-0.154901	0.211096	0.0925357	-0.160796	-0.207036	-0.152813	-0.0747976	-0.127849	-0.607662	-0.0294281	-0.565241	-0.53664
Parthenolide_0.6045	IkappaB kinase inhibitor	-0.159661	-0.15141	0.133436	0.27763	0.184006	0.433931	-0.477667	-0.394398	-0.477667	-0.394398	-0.34885	-0.469799	-0.401554	0.433931	0.371178	0.00772476	0.155338	0.015625	0.277321	0.560644	0.545389	0.560644	0.545389	0.449762	0.0748215	0.682379	0.411386	-0.0498848	0.151754	0.70742	-0.0483265	-0.0816517	0.0641956	0.275204	-0.0511932	0.503777	0.344244	0.25	0.113621	-0.411452	-0.153828	0.12677	0.0489082	-0.0547981	-0.496901	0.0669918	-0.480019	-0.53491
Paxilline_1.725	Potassium channels	-0.139758	-0.155153	-0.0464668	0.153845	0.247784	-0.434444	-0.626114	-0.601532	-0.626114	-0.601532	-0.518929	-0.565266	-0.592829	-0.434444	-0.090332	0.459908	0.0339928	0.0183449	-0.0238895	-0.00470352	-0.118326	-0.00470352	-0.118326	-0.014264	-0.058197	0	0.199106	-0.0460052	-0.017231	0.00891304	-6.10352e-05	-6.10352e-05	-0.000976562	-0.0249634	-6.10352e-05	-0.419941	-0.155235	0.456326	0.0513725	-0.679897	-0.274305	-0.295244	-0.0671959	-0.0613785	-0.779415	0.0443115	-0.735836	-0.259632
Penitrem A_0.04725	Potassium channels	0.112819	0.130675	-0.041935	-0.15423	-0.209236	-0.174124	0.42133	0.396976	0.42133	0.396976	0.0592213	0.57181	0.321222	-0.174124	-0.0638504	0.0215282	0.190908	-0.0843773	0.0553131	-0.0156593	-0.0749226	-0.0156593	-0.0749226	-0.17251	-0.00174332	-0.0147095	0.0102749	-0.247028	-0.00510788	-0.0862751	0.171988	0.202028	0.040554	-0.0239944	0.174459	-0.14798	-0.0918217	-0.0213051	0.0944862	-0.0380854	-0.0318775	-0.080204	-0.0840397	-0.00348751	0.258625	0.200869	0.285349	0.410284
Pepstatin_0.008745	protease inhibitor	-0.283515	-0.287545	-0.423634	0.196551	-0.0968397	0.20214	-0.138166	-0.0203283	-0.138166	-0.0203283	0.0425071	-0.142218	-0.0311496	0.20214	0.0616651	-0.0815059	-0.399934	0.0132242	-0.289494	0.00559094	0.0946219	0.00559094	0.0946219	0.027506	0.0378561	-0.000256441	0.0473037	0.278999	0.0250243	0.0229653	-0.301896	-0.309351	-0.205825	-0.0465292	-0.277091	0.136816	0.0678071	-0.105161	-0.337127	-0.0227819	0.50109	0.210544	0.0458953	-0.00230829	-0.152167	-0.311865	-0.15344	-0.120437
Phenamil_0.0981	Sodium channels	0.303475	0.310975	0.25629	-0.306574	-0.19825	0.0710964	0.308008	0.242924	0.308008	0.242924	0.0770435	0.334749	0.250055	0.0710964	-0.107307	0.0253124	0.0798244	0.0201683	0.0382233	-0.0156593	-0.0749226	-0.0156593	-0.0749226	-0.155782	-0.00174332	-0.0147095	0.0102749	-0.0578737	-0.00510788	-0.155489	0.358267	0.370363	0.388943	0.0697708	0.364889	-0.10379	-0.0949955	0.0510902	0.109501	-0.0380854	-0.0318775	-0.0688515	-0.121027	-0.00348751	0.329914	0.23163	0.330393	0.461676
Phenamil_2.46	Sodium channels	-0.19613	-0.155153	-0.128986	0.167273	-0.0887156	-0.187618	-0.494766	-0.574677	-0.494766	-0.574677	-0.299568	-0.604694	-0.595758	-0.187618	0.050415	0.357002	-0.112118	0.314976	-0.0902958	0.127995	-0.0123692	0.127995	-0.0123692	-0.014264	9.15527e-05	0	0.0959568	-0.0460052	0.0821724	0.00891304	-0.252014	-0.0161743	-0.000976562	-0.0249634	-0.252014	-0.178364	0.0329208	0.349148	-0.0787163	-0.679897	0.144667	-0.128618	0.0195885	-0.0105972	-0.232052	-0.161499	-0.196285	-0.259632
Phenanthridinone [6(5H)-Phenanthridinone]_3.84	PARP inhibitor	-0.0351579	-0.0153562	-0.0138313	0.027366	0.0524448	-0.129465	-0.280021	-0.603955	-0.280021	-0.603955	-0.636428	-0.571501	-0.853679	-0.129465	-0.0107755	0.0816977	0.0293947	0.0371315	0.0510238	-0.000248812	-0.0871302	-0.000248812	-0.0871302	-0.0186637	-0.162718	-0.128589	0.12523	0.0530441	-0.0239286	-0.0575479	0.0453793	0.0451778	0.105118	0.0723466	0.0514262	-0.112934	0.0124593	0.143186	0.0224536	-0.228988	-0.236538	-0.0954275	-0.000840168	-0.150014	-0.436003	4.67106e-07	-0.412685	-0.110329
Phenanthridinone [6(5H)-Phenanthridinone]_0.768	PARP inhibitor	0.190941	0.166119	0.0569702	-0.0934917	0.0905161	-0.185773	-0.572053	-0.589063	-0.572053	-0.589063	-0.574382	-0.494054	-0.589068	-0.185773	-0.0853483	0.0359796	0.0484094	-0.0284428	0.0697987	0.0102506	-0.0250638	0.0102506	-0.0250638	0.0251667	-0.000226079	0.0149239	-0.048439	-0.0183921	0.00184164	-0.00542279	0.144214	0.0535608	-3.11404e-05	0.0457094	0.1123	-0.176443	0.0737415	0.00368111	0.0283616	-0.120101	-0.107542	-0.264804	-0.0270158	0.0669884	-0.607662	-0.0294281	-0.609395	-0.620136
Phenoxybenzamine_2.475	calmodulin inhibitor	-0.39881	-0.401407	-0.000159439	0.292084	0.0109409	-0.478551	-0.280021	-0.613128	-0.280021	-0.613128	-0.583415	-0.669297	-0.853679	-0.478551	0.170967	0.58965	0.0428224	0.326857	0.0510238	-0.252062	-0.181229	-0.252062	-0.181229	-0.0141296	-0.309656	-0.26182	-0.409235	0.257843	-0.0239286	-0.0575479	-0.112483	-0.136068	0.105118	0.0207283	-0.103254	-0.46617	0.189008	0.593869	0.0467282	-0.720434	-0.0203547	-0.426273	-0.0118963	-0.503331	-0.436003	4.67106e-07	-0.412685	-0.110329
Phenoxybenzamine_0.4935	calmodulin inhibitor	-0.178629	-0.189775	0.061016	0.18217	-0.0547669	0.413905	-0.392087	-0.148075	-0.392087	-0.148075	0.57916	-0.459269	-0.0939504	0.413905	0.321851	-0.0561038	-0.145508	0.112044	0.0697987	-0.0223182	0.0498615	-0.0223182	0.0498615	0.0433378	-0.0878377	-0.11401	0.142991	0.22776	-0.0379745	-0.067295	-0.0243759	-0.0942974	-3.11404e-05	0.0457094	-0.0373834	0.41741	0.228038	-0.0279905	-0.11402	-0.158911	-0.127767	0.23059	0.195682	0.0623149	-0.493927	-0.0294281	-0.496602	-0.435322
Phentolamine_0.10665	Potassium channels	0.138033	0.156318	0.010807	-0.216486	-0.189461	-0.125784	0.446436	0.386234	0.446436	0.386234	0.167742	0.398226	0.391047	-0.125784	-0.185921	-0.0489941	0.0743313	0.026516	-0.0523834	-0.056675	-0.139132	-0.056675	-0.139132	-0.102412	-0.00174332	0.000549316	-0.026144	-0.0578737	-0.0324516	-0.0229206	0.223501	0.158083	0.128567	-0.00800323	0.157736	0.109161	-0.0949955	-0.0532875	0.126347	-0.0380854	-0.0318775	-0.0688515	-0.0358219	-0.00348751	0.460896	0.261904	0.461252	0.524054
Phorbol 12 myristate 13 acetate_0.243	PKC activator	0.0390502	0.0778333	-0.0496112	-0.150842	-0.0770186	-0.185773	0.0831441	0.0265975	0.0831441	0.0265975	0.033157	0.130385	0.105913	-0.185773	-0.153882	-0.00755466	0.0484094	-0.0796077	-0.0380948	-0.0752269	-0.174269	-0.0752269	-0.174269	-0.0397105	-0.000226079	-0.11401	-0.251425	0.0634535	-0.0379745	-0.067295	0.0673795	0.0535608	-3.11404e-05	0.00811176	0.1123	-0.176443	-0.139939	-0.0175971	0.0283616	-0.251159	-0.255552	-0.152813	-0.0747976	0.0445275	-0.0606473	-0.0294281	-0.0604276	-0.0526489
Piceatannol_3.075	kinase inhibitor	-0.416809	-0.377289	-0.0138313	0.353468	0.0524448	0.0285305	-0.280021	-0.603955	-0.280021	-0.603955	0.000267496	-0.669297	-0.853679	0.0285305	0.237478	0.00618853	-0.109752	0.0574998	-0.0758564	0.0119676	0.0666572	0.0119676	0.0666572	0.133201	-0.00946792	0.0354669	0.516447	0.210619	0.271696	0.138742	-0.112483	-0.110991	-0.030899	0.0723466	-0.103254	0.00788366	0.264761	0.00242116	-0.12583	-0.23166	0.259932	0.0365548	0.271697	-0.0436678	-0.436003	4.67106e-07	-0.412685	-0.110329
Piceatannol_0.6135	kinase inhibitor	-0.177548	-0.195169	-0.10831	0.225265	-0.0770186	-0.219325	-0.507844	-0.53713	-0.507844	-0.53713	-0.53089	-0.184156	-0.521196	-0.219325	-0.153882	0.141379	0.112897	0.0624482	0.0383218	0.0102506	0.120627	0.0102506	0.120627	0.17343	0.244088	0.3058	0.220872	-0.0427364	0.213651	0.263828	-0.0243759	-0.0942974	-3.11404e-05	-0.0017641	-0.0373834	-0.274099	-0.113676	0.175556	0.0793521	-0.250958	-0.145653	-0.152813	-0.0747976	-0.139882	-0.518516	0.0181279	-0.521505	-0.415546
Pinacidil_3.06	Potassium channels	0.163348	0.15791	-0.0464668	-0.0735226	-0.0262769	-0.119991	-0.0167389	-0.063446	-0.0167389	-0.063446	-0.138191	0.0607491	-0.12591	-0.119991	-0.20105	0.137276	0.0857506	0.0183449	-0.0238895	0.620914	0.58024	0.620914	0.58024	-0.145024	9.15527e-05	0	0.285898	-0.134384	0.12978	-0.0255146	-6.10352e-05	-6.10352e-05	-0.000976562	-0.0249634	-6.10352e-05	-0.183735	-0.0771103	0.228542	0.121197	-0.328823	-0.143568	-0.0249805	-0.0200768	0.00571442	-0.0103722	0.0032959	-0.00951767	-0.127064
Prazocin_1.95	alpha adrenergic agonist	-0.496191	-0.512991	0.146644	0.353468	0.0524448	-0.231446	-0.280021	-0.494789	-0.280021	-0.494789	-0.346424	-0.555737	-0.662657	-0.231446	0.0313531	0.645	0.297949	0.601201	0.405097	0.0119676	0.0424873	0.0119676	0.0424873	0.0576913	0.0234537	-0.00275203	0.060602	0.357941	0.209475	0.0861472	0.0301729	-0.110991	0.105118	0.0723466	0.0051092	-0.209718	0.0124593	0.587522	0.304855	-0.587796	-0.236538	-0.0954275	-0.000840168	-0.503331	-0.436003	4.67106e-07	-0.412685	-0.110329
Procainamide_0.6375	Sodium channels	0.207394	0.218628	0.133558	-0.158489	-0.101364	-0.0766315	-0.49317	-0.430653	-0.49317	-0.430653	-0.377537	-0.413891	-0.386051	-0.0766315	-0.0684433	0.00772476	0.153996	0	0.0777359	-0.000829697	-0.0463657	-0.000829697	-0.0463657	-0.0210514	0.00157928	-0.0227108	0.0659275	0.0705147	0.000387192	-0.0121078	0.175768	0.174059	0.0641956	0.0647545	0.172043	-0.0429611	-0.0856991	0	0.135838	0.162463	-0.237446	0.0022583	-0.0342598	-0.00706863	-0.488234	0.058569	-0.487465	-0.488279
Propafenone_0.4395	Potassium channels	0.285641	0.285234	-0.0842419	-0.0481377	-0.0509491	-0.0766315	-0.540411	-0.486195	-0.540411	-0.486195	-0.511936	-0.380932	-0.441715	-0.0766315	-0.0967636	0.00772476	-0.132389	0	-0.0776138	-0.0104733	-0.0463657	-0.0104733	-0.0463657	-0.0210514	0.00157928	-0.0227108	0.00806618	-0.0185127	-0.0182095	-0.0121078	-0.0825062	-0.0915394	-0.0705433	-0.0303307	-0.0851288	-0.10363	-0.0299129	0	-0.098362	0.118407	0.171406	-0.00897217	-0.0342598	-0.0547981	-0.488234	0.0669918	-0.487465	-0.464842
Prostaglandin D2_0.15	prostaglandin	0.163348	0.176109	-0.0723457	-0.199011	-0.108752	0.0142784	0.0122223	0.0275574	0.0122223	0.0275574	0.0449295	0.0644112	0.0508366	0.0142784	0.050415	0.244942	-0.112118	0.541294	-0.138025	0.77985	0.623575	0.77985	0.623575	0.0383449	0.0978699	0	0.452524	-0.0461273	0.389301	0.00891304	-6.10352e-05	-6.10352e-05	-0.000976562	-0.0249634	-6.10352e-05	0.0337105	-0.0743027	0.228542	-0.0787163	-0.532558	0.194471	0.0213184	0.0195885	-0.0105972	0.00439072	0.0443115	0.0111046	0.0106087
Puromycin_0.05655	inhibits protein synthesis	0.095645	-0.234073	0.536584	0.123874	0.320072	-0.486515	-0.541073	-0.552805	-0.541073	-0.552805	-0.275344	-0.529262	-0.467177	-0.486515	-0.252506	0.549454	0.377111	0.596525	0.428922	-0.516273	-0.528477	-0.516273	-0.528477	-0.496131	-0.133532	-0.30366	-0.625876	-0.429337	-0.457077	-0.711613	-0.498293	-0.433926	0.020214	-0.278125	-0.352632	-0.433278	-0.309196	0.548062	0.368638	-0.0067039	0.0188367	-0.274365	-0.43941	0	-0.480561	-0.572082	-0.480874	-0.46929
Puromycin_1.4145	inhibits protein synthesis	-0.416809	-0.422697	0.146644	0.615257	0.345135	0.203823	-0.280021	-0.603955	-0.280021	-0.603955	-0.876384	-0.669297	-0.853679	0.203823	0.367081	0.264699	0.0293947	0.460227	0.339947	-0.252062	-0.0871302	-0.252062	-0.0871302	-0.0186637	-0.309656	-0.26182	-0.61787	0.566018	-0.0239286	-0.0575479	0.0301729	-0.110991	0.105118	0.0723466	0.0051092	0.220356	0.38725	0.35231	0.0224536	-0.720434	-0.0573222	0.0365548	0.271697	-0.0953263	-0.436003	4.67106e-07	-0.412685	-0.110329
Quercetin_2.22	kinase inhibitor	-0.0881781	-0.195026	0.146644	0.353468	0.0524448	0.203823	-0.280021	-0.354792	-0.280021	-0.354792	0.579648	-0.669297	-0.370839	0.203823	0.286654	0.00618853	-0.00707323	0.307046	0.0510238	-0.000248812	0.0424873	-0.000248812	0.0424873	0.0134321	-0.309656	-0.26182	0.417849	0.401084	0.0927762	-0.0575479	0.299146	0.265428	0.105118	0.104782	0.288522	0.220356	0.310381	0.0156745	-0.0116417	-0.459959	-0.0255397	0.0630266	0.271697	-0.0520564	-0.436003	4.67106e-07	-0.412685	-0.110329
Quercetin_0.444	kinase inhibitor	0.190941	0.0778333	0.401313	0.296896	0.308255	0.00831806	-0.572053	-0.588784	-0.572053	-0.588784	-0.0144977	-0.560832	-0.589486	0.00831806	0.190573	0.240953	0.368059	0.208688	0.450333	0.0102506	0.195021	0.0102506	0.195021	0.546895	0.244088	0.614673	0.142991	-0.0427364	0.263979	0.536359	0.144214	0.0535608	-3.11404e-05	0.0698793	0.1123	0.00972981	0.221412	0.175556	0.319586	-0.246917	-0.232856	-0.00434097	0.0814243	0.0760914	-0.607662	0.194328	-0.565241	-0.620136
RG-14620_2.73	kinase inhibitor	-0.186563	-0.381767	0.156758	0.522483	0.225087	-0.537947	-0.280021	-0.494789	-0.280021	-0.494789	-0.415132	-0.547994	-0.518509	-0.537947	-0.008648	0.647023	0.611914	0.618605	0.482943	0.336221	0.208747	0.336221	0.208747	0.347207	0.460361	0.45633	0.0879457	-0.288814	0.560515	0.472343	-0.112483	-0.398798	0.105118	0.0207283	-0.131853	-0.505512	-0.0159819	0.669099	0.678146	-0.720434	-0.138712	-0.418391	-0.0155584	-0.271985	-0.436003	4.67106e-07	-0.412685	-0.110329
RG-14620_0.5445	kinase inhibitor	-0.05757	-0.119209	0.0569702	0.238743	0.157515	-0.0345457	-0.507844	-0.516727	-0.507844	-0.516727	-0.418725	-0.495259	-0.589486	-0.0345457	0.094521	0.532108	0.368059	0.475255	0.303144	0.277131	0.5191	0.277131	0.5191	0.419524	0.611415	0.669988	-0.021444	-0.462937	0.646199	0.686226	-0.0243759	-0.0942974	-3.11404e-05	0.0457094	-0.00923748	-0.0305864	0.087518	0.564681	0.319586	-0.349876	-0.23084	-0.00434097	-0.0270158	-0.0676162	-0.607662	0.0827903	-0.609395	-0.571308
RK-682_2.04	phosphatase inhibitor	-0.0319805	-0.0963007	-0.000159439	0.027366	0.0524448	-0.397497	-0.0833827	-0.416874	-0.0833827	-0.416874	-0.435326	0.0144423	-0.364735	-0.397497	-0.157853	0.477136	0.101172	0.377917	0.0510238	-0.0163272	-0.181229	-0.0163272	-0.181229	-0.0186637	-0.162718	-0.128589	0.102734	0.0039718	-0.0239286	-0.0575479	-0.00882799	-0.0621979	0.0396881	0.000359983	-0.00657405	-0.388708	-0.126333	0.472566	0.0883716	-0.377103	-0.236538	-0.322164	-0.138745	-0.10691	-0.260013	4.67106e-07	-0.24088	-0.110329
RWJ-60475-(AM)3_1.209	phosphatase inhibitor	-0.0653604	-0.193717	0.146644	0.315836	0.13629	-0.322197	-0.280021	-0.494789	-0.280021	-0.494789	-0.481608	-0.518767	-0.662657	-0.322197	-0.0214479	0.526696	0.321247	0.548501	0.339947	-0.252062	-0.0871302	-0.252062	-0.0871302	-0.0401829	-0.309656	-0.26182	-0.483907	-0.209015	-0.0239286	-0.0575479	-0.00882799	-0.0101262	0.105118	0.000359983	-0.00657405	-0.301585	-0.0129475	0.524533	0.27929	-0.502033	-0.236538	-0.00349115	0.0340782	-0.271985	-0.436003	4.67106e-07	-0.412685	-0.110329
Rapamycin_0.8205	prolyl cis-trans isomerase inhibitor	-0.0737926	-0.0700262	-0.0138313	0.0696372	0.0524448	-0.0587342	-0.280021	-0.354792	-0.280021	-0.354792	-0.438884	-0.571501	-0.370839	-0.0587342	0.0313531	0.00618853	-0.00707323	0.00500955	-0.0227733	-0.000248812	0.00677303	-0.000248812	0.00677303	-0.0186637	-0.00946792	0.010146	0.371463	0.0332687	0.0927762	0.138742	-0.112483	-0.110991	-0.030899	0.0207283	-0.103254	-0.0473996	0.043221	0.0156745	0.00142265	-0.307445	-0.155088	-0.0954275	0.017372	-0.118764	-0.436003	4.67106e-07	-0.412685	-0.110329
Resveratrol_3.285	SIRT1 activator	-0.0653604	-0.116901	0.146644	0.315836	0.0524448	0.489677	-0.280021	-0.603955	-0.280021	-0.603955	-0.589274	-0.669297	-0.853679	0.489677	0.478758	-0.178343	-0.109752	0.0368176	0.010357	-0.252062	-0.0871302	-0.252062	-0.0871302	-0.0186637	-0.309656	-0.26182	0.36787	0.324831	-0.0239286	-0.0575479	0.0301729	0.0342613	-0.030899	0.0723466	0.0348944	0.502547	0.38725	-0.0427392	-0.12583	-0.180734	0.187045	0.329942	0.299738	-0.0472729	-0.436003	4.67106e-07	-0.412685	-0.110329
Resveratrol_0.657	SIRT1 activator	0.155924	0.140002	0.232333	0.189983	0.157515	0.525582	-0.0276544	0.132555	-0.0276544	0.132555	0.461973	-0.509697	0.27737	0.525582	0.321851	-0.0561038	-0.0799036	0.286639	0.129994	-0.0752269	0.0498615	-0.0752269	0.0498615	0.228675	-0.0205944	-0.00107761	0.0736204	0.0634535	-0.00707323	-0.0129214	0.021795	0.0535608	-3.11404e-05	0.0457094	0.1123	0.527238	0.2091	-0.0279905	-0.07283	-0.0532804	0.0655378	0.407975	0.299686	0.142044	-0.0709361	-0.0294281	-0.0713093	-0.0166905
Ro 20-1724_2.7	phosphodiesterase inhibitor	-0.208385	-0.215263	-0.128986	-0.199011	-0.102135	-0.0836143	-0.583389	-0.555389	-0.583389	-0.555389	-0.519661	-0.612507	-0.592829	-0.0836143	-0.0324707	0.00177765	-0.0105553	0.00857925	-0.00521278	-0.194889	-0.210001	-0.194889	-0.210001	-0.0214331	-0.551361	0	0.0444431	-0.0118256	-0.469746	-0.0255146	-6.10352e-05	-6.10352e-05	-0.000976562	-0.0249634	-6.10352e-05	-0.0794868	-0.0743027	-0.000514984	-0.0025444	-0.290859	0.201429	-0.225664	-0.0200768	-0.0613785	-0.779415	-0.161499	-0.735836	-0.259632
Ro 20-1724_0.5385	phosphodiesterase inhibitor	-0.186376	-0.164523	-0.220716	-0.0940361	-0.294235	-0.0766315	-0.539923	-0.486195	-0.539923	-0.486195	-0.483006	-0.347729	-0.501041	-0.0766315	-0.0967636	0.00772476	-0.114811	0	-0.307106	-0.0104733	-0.0463657	-0.0104733	-0.0463657	-0.0210514	-0.177361	5.72205e-06	0.0239353	-0.00264359	-0.194479	-0.0121078	-0.139147	-0.140856	-0.0705433	-0.081356	-0.142258	-0.0429611	-0.035162	0	-0.123508	-0.0320711	0.271137	-0.11615	-0.091877	-0.00706863	-0.496901	-0.108496	-0.495277	-0.542967
Ro 31-8220_0.06555	kinase inhibitor	0.325193	0.282406	0.568252	0.229901	0.429691	0.535203	-0.483933	-0.430878	-0.483933	-0.430878	0.0834839	-0.465297	-0.45204	0.535203	0.522595	-0.0381535	-0.0321056	0.464899	0.572616	-0.179778	0.135306	-0.179778	0.135306	0.417064	-0.133532	-0.0600771	0.32799	0.174524	-0.144577	-0.0650935	0.133163	0.133176	0.28263	0.683259	0.212704	0.497591	0.520098	-0.0574095	-0.0587192	-0.0067039	0.120922	0.512925	0.526289	0	-0.407738	0.284659	-0.408992	-0.437621
Ro 31-8220_0.3285	kinase inhibitor	0.255324	0.226053	0.49304	0.276915	0.403679	0.636562	-0.621195	-0.569671	-0.621195	-0.569671	-0.202695	-0.511233	-0.539681	0.636562	0.394082	-0.0561038	-0.242362	0.475255	0.158713	-0.159386	-0.00207971	-0.159386	-0.00207971	-0.0382457	-0.362949	-0.240789	-0.446249	-0.726749	-0.411928	-0.316667	0.421976	0.279844	0.0142611	0.348165	0.377367	0.63473	0.405598	-0.0279905	-0.29015	-0.090859	0.0822452	0.543543	0.421268	-0.0585133	-0.5385	0.194328	-0.540548	-0.477802
Roscovitine_2.115	kinase inhibitor	-0.227564	-0.223658	0.146644	0.50637	0.345135	0.562082	-0.280021	-0.603955	-0.280021	-0.603955	-0.876384	-0.669297	-0.853679	0.562082	0.567556	0.023941	-0.109752	0.548501	0.220841	-0.252062	-0.0290945	-0.252062	-0.0290945	-0.000422886	-0.309656	-0.26182	-0.391447	0.371369	-0.0239286	-0.0575479	-0.112483	-0.110991	-0.030899	0.0723466	-0.103254	0.513708	0.568054	0.0156745	-0.12583	-0.307445	0.290047	0.329942	0.571362	-0.0472729	-0.436003	4.67106e-07	-0.412685	-0.110329
Roscovitine_0.423	kinase inhibitor	-0.177548	-0.195169	0.061016	0.239564	0.157515	0.539987	-0.425883	-0.180267	-0.425883	-0.180267	0.301014	-0.513433	-0.236947	0.539987	0.321851	0.0359796	-0.0799036	0.468419	0.132526	0.0102506	0.456914	0.0102506	0.456914	0.17343	0.0143165	-0.00107761	0.227673	0.361514	0.213651	-0.00542279	-0.128694	-0.151845	-3.11404e-05	0.0457094	-0.0843979	0.542514	0.278227	0.149433	-0.06289	-0.41063	0.170086	0.407975	0.299686	-0.0373428	-0.414337	-0.0294281	-0.417117	-0.477802
Rottlerin_0.291	kinase inhibitor	-0.177548	-0.189775	-0.10831	0.18595	-0.0770186	-0.0058069	-0.567519	-0.541978	-0.567519	-0.541978	-0.0742424	-0.513957	-0.484924	-0.0058069	-0.0769429	-0.00755466	-0.0131834	-0.0284428	-0.0691178	-0.0752269	-0.0932837	-0.0752269	-0.0932837	0.0251667	-0.201956	-0.00107761	0.0137711	0.143148	-0.115751	-0.00542279	-0.0243759	-0.0942974	-3.11404e-05	0.00811176	-0.0373834	-0.0305864	-0.091215	-0.0175971	0.00862106	-0.308404	-0.212683	-0.00434097	-0.0270158	-0.0604664	-0.607662	-0.0294281	-0.609395	-0.561054
Rottlerin_1.452	kinase inhibitor	-0.360315	-0.390732	-0.0354901	0.201194	0.0109409	-0.204591	-0.280021	-0.603955	-0.280021	-0.603955	-0.555583	-0.664972	-0.853679	-0.204591	-0.0271329	0.466219	0.0496583	0.109432	-0.0227733	-0.000248812	-0.0871302	-0.000248812	-0.0871302	-0.0186637	-0.309656	-0.26182	-0.251311	0.433903	-0.0239286	-0.0575479	-0.142129	-0.136068	0.105118	0.000359983	-0.131853	-0.189176	-0.0263055	0.453872	0.0397876	-0.587796	-0.236538	-0.194409	-0.0882076	-0.503331	-0.436003	4.67106e-07	-0.412685	-0.110329
SB 202190_2.265	kinase inhibitor	-0.227564	-0.223658	-0.0138313	0.127045	0.0524448	-0.414447	-0.0117449	-0.0843191	-0.0117449	-0.0843191	-0.103434	-0.171529	-0.0970176	-0.414447	-0.157853	0.153196	0.0293947	-0.0351435	-0.0758564	-0.000248812	-0.0871302	-0.000248812	-0.0871302	-0.0186637	-0.309656	-0.00275203	0.118533	0.48172	-0.0239286	0.138742	0.0301729	-0.0101262	0.105118	-0.0533734	0.0348944	-0.518451	-0.126333	0.135931	0.0224536	-0.342606	-0.236538	-0.0954275	-0.0155584	-0.117009	-0.013291	4.67106e-07	-0.00671418	-0.110329
SB 202190_0.453	kinase inhibitor	-0.0444562	-0.0610386	-0.10831	-0.0926974	-0.0770186	-0.284127	-0.081749	-0.317578	-0.081749	-0.317578	-0.271648	0.0467254	-0.34409	-0.284127	-0.181714	0.0301551	0.0151714	-0.0984415	-0.0713525	0.0102506	-0.0435487	0.0102506	-0.0435487	-0.0233531	-0.0205944	0.0149239	0.309356	-0.0427364	0.00184164	-0.00542279	-0.0243759	-0.0942974	-3.11404e-05	-0.0828188	-0.0373834	-0.369802	-0.222388	0.00368111	0.00862106	-0.15953	0.0605623	-0.0720726	-0.0747976	0.0279259	-0.112475	-0.0294281	-0.186823	-0.119857
SB 203580_1.98	kinase inhibitor	-0.0737926	-0.0544012	-0.0138313	-0.0207742	-0.0216831	-0.261197	-0.0117449	-0.354792	-0.0117449	-0.354792	-0.195231	-0.283834	-0.157041	-0.261197	-0.157853	0.153196	0.0496583	0.00500955	-0.0227733	-0.000248812	-0.0871302	-0.000248812	-0.0871302	-0.0186637	0.00315514	0.010146	0.0483252	-0.0697154	-2.80263e-06	0.004395	0.0301729	0.0342613	0.105118	-0.0533734	0.0348944	-0.301585	-0.176243	0.135931	0.0397876	-0.216401	-0.236538	-0.0954275	-0.0615266	0.0689559	-0.013291	4.67106e-07	-0.00671418	-0.110329
SB-415286_2.085	kinase inhibitor	-0.158447	-0.142714	0.339436	0.153845	0.256792	0.859249	-0.626114	-0.442841	-0.626114	-0.442841	0.519905	-0.611042	-0.546442	0.859249	0.528687	0.00177765	-0.0105553	0.566929	0.523767	-0.310368	0.144571	-0.310368	0.144571	0.282708	0.59079	0	-0.550303	-0.0460052	-0.0612984	0.0474873	-6.10352e-05	-6.10352e-05	-0.000976562	0.117249	-6.10352e-05	0.852802	0.499596	0.0520287	-0.0025444	-0.532558	-0.170179	0.863359	0.779354	-0.0613785	-0.779415	-0.0618896	-0.735836	-0.259632
SB-431542_1.95	kinase inhibitor	0.144044	0.0700786	0.0665657	0.0696372	0.0524448	-0.231446	-0.280021	-0.603955	-0.280021	-0.603955	-0.438884	-0.664972	-0.853679	-0.231446	-0.157853	0.264699	0.321247	0.0368176	0.0763796	0.0549363	0.0666572	0.0549363	0.0666572	0.133201	0.157801	0.298929	0.0102393	-0.0697154	0.209475	0.192383	0.0425891	0.0451778	0.105118	-0.0112417	0.0514262	-0.301585	-0.126333	0.242935	0.304855	-0.335867	-0.236538	-0.0954275	-0.138745	-0.234197	-0.436003	4.67106e-07	-0.412685	-0.110329
SDZ-201106_1.605	Sodium channels	-0.194844	-0.222616	-0.13448	0.130651	-0.0641446	-0.3092	-0.642715	-0.538055	-0.642715	-0.538055	-0.407356	-0.605183	-0.833063	-0.3092	-0.166138	0.563545	-0.0105553	0.45853	-0.0902958	-0.310368	-0.450602	-0.310368	-0.450602	-0.191776	-0.058197	0	-0.551279	-0.059433	-0.665668	-0.455202	-6.10352e-05	-6.10352e-05	-0.000976562	-0.0249634	-6.10352e-05	-0.353046	-0.0970078	0.649319	-0.0025444	-0.679897	-0.0995007	-0.128618	-0.145565	-0.0613785	-0.779415	0.0032959	-0.735836	-0.259632
SKF-96365_0.0819	Calcium channels	0.252035	-0.0980767	0.655827	0.172297	0.406868	-0.0481472	-0.366236	-0.281498	-0.366236	-0.281498	-0.291765	-0.0532551	-0.267633	-0.0481472	-0.221077	0.55545	0.502432	0.888332	0.495987	0.523743	0.426783	0.523743	0.426783	0.372816	0.642531	0.567444	-0.478903	-0.532567	0.487367	0.554198	0.358267	-0.227785	0.514214	0.570368	0.494162	0.0370178	-0.239649	0.556814	0.48621	-0.0380854	-0.00782967	0.0227089	-0.0358219	-0.00348751	-0.357502	0.460634	-0.353098	-0.294073
SKF-96365_2.04	Calcium channels	-0.115524	-0.174822	-0.027668	0.384558	0.162919	-0.119991	-0.571915	-0.555389	-0.571915	-0.555389	-0.293098	-0.611042	-0.547907	-0.119991	0.0336914	0.57795	0.158504	0.425083	0.239954	0.496403	0.446817	0.496403	0.446817	0.282708	0.590668	0.5625	0.218271	-0.21666	0.397724	0.486818	-0.142151	-0.252014	-0.000976562	-0.0249634	-0.252014	-0.1133	0.0329208	0.581692	0.247906	-0.679897	-0.272108	-0.0249805	0.0289879	-0.0105972	-0.779415	-0.161499	-0.735836	-0.259632
SKF-96365_0.4095	Calcium channels	-0.242994	-0.164155	0.451674	0.336834	0.359665	-0.0766315	-0.45606	-0.456532	-0.45606	-0.456532	-0.461887	-0.107128	-0.376652	-0.0766315	0.0938339	0.315586	0.4715	0.25	0.568703	0.652441	0.601053	0.652441	0.601053	0.631891	0.611931	0.822027	-0.490976	-0.617268	0.677389	0.852928	-0.139147	-0.166002	0.308825	0.28204	-0.142258	-0.0429611	0.0710506	0.671875	0.568455	-0.481765	-0.343647	0.0125122	0.296955	-0.0547981	-0.434401	0.0669918	-0.439247	-0.284788
SP-600125_0.1362	kinase inhibitor	0.256469	0.284265	0.181673	-0.0995997	0.154022	0.0257517	-0.538559	-0.49371	-0.538559	-0.49371	-0.597609	-0.359235	-0.513075	0.0257517	0.0514037	-0.0381535	-0.017213	-0.0342345	0.0449932	-0.0897248	-0.0330812	-0.0897248	-0.0330812	-0.0367977	-0.133532	-0.0600771	0.186179	-0.00547401	-0.05864	-0.0989244	-0.0664081	-0.140194	-0.0556841	-0.0186385	-0.0593143	-0.0543017	0.05508	-0.0574095	-0.0347586	-0.0067039	-0.0176857	0.0123674	-0.044251	0	-0.407738	-0.178807	-0.408992	-0.437621
SP-600125_3.405	kinase inhibitor	-0.142246	-0.193717	0.352245	0.498802	0.345135	0.599122	-0.280021	-0.354792	-0.280021	-0.354792	0.144031	-0.664972	-0.370839	0.599122	0.588901	0.00618853	-0.141874	0.548501	0.339947	-0.252062	0.00677303	-0.252062	0.00677303	0.133201	-0.309656	-0.26182	0.0483252	0.0144001	-0.0239286	-0.0575479	0.0918358	0.0451778	0.105118	0.38959	0.099208	0.619526	0.585597	0.0601779	-0.158579	-0.260919	0.187638	0.607565	0.655416	0.0833501	-0.436003	4.67106e-07	-0.412685	-0.110329
SP-600125_0.681	kinase inhibitor	0.155924	0.0778333	0.401313	0.322734	0.292944	0.122576	-0.621195	-0.541978	-0.621195	-0.541978	-0.0257631	-0.513957	-0.542506	0.122576	0.505863	-0.0162042	-0.0455495	0.0716209	0.383381	-0.000659398	0.0498615	-0.000659398	0.0498615	0.285037	-0.000226079	-0.00107761	0.431112	0.143148	0.0851285	0.055088	-0.0243759	-0.0942974	-3.11404e-05	0.0698793	-0.0373834	0.0571628	0.45624	0.00368111	-0.06289	-0.130218	-0.144221	0.0957891	0.524295	0.197883	-0.563682	-0.0294281	-0.565241	-0.561054
SQ-29548_0.03	bioactive lipid	-0.234845	-0.239523	-0.12892	-0.0631523	-0.033493	-0.235201	-0.493414	-0.406361	-0.493414	-0.406361	-0.521458	-0.0353508	-0.376896	-0.235201	-0.071373	0.279697	-0.0912514	0.140625	-0.0776138	0.596289	0.513163	0.596289	0.513163	-0.000909805	0.674431	0.0241756	-0.399546	0.0237617	0.677389	0.038475	-0.0825062	-0.0915394	-0.0705433	-0.0105553	-0.0851288	-0.195549	-0.035162	0.625	-0.0956764	-0.433664	0.115131	-0.00897217	0.0127754	-0.0547981	-0.464308	0.0669918	-0.464394	-0.390867
SU-4312_2.835	kinase inhibitor	-0.412061	-0.444546	0.352245	0.498802	0.345135	-0.129465	-0.280021	-0.354792	-0.280021	-0.354792	-0.0871118	-0.571501	-0.370839	-0.129465	0.125626	0.645	0.55496	0.615047	0.67156	0.656987	0.605092	0.656987	0.605092	0.617645	0.610333	0.636402	0.0334675	-0.413884	0.756106	0.75021	-0.00882799	-0.110991	0.105118	0.263404	-0.00657405	-0.112934	0.0481387	0.649882	0.557261	-0.471132	-0.115746	-0.0954275	0.0340782	-0.0514803	-0.0486565	4.67106e-07	-0.0378944	0.01616
SU-4312_0.567	kinase inhibitor	-0.250197	-0.349787	0.159091	0.322734	0.224166	-0.0345457	-0.49194	-0.405329	-0.49194	-0.405329	-0.276042	-0.395678	-0.414368	-0.0345457	0.127306	0.475189	0.400844	0.492833	0.350909	0.277131	0.615152	0.277131	0.615152	0.56259	0.694143	0.529851	-0.00264522	-0.354085	0.608566	0.660208	-0.0278985	-0.151845	0.136471	0.125299	-0.0452657	-0.0305864	0.114478	0.516551	0.341873	-0.241514	-0.371212	-0.00434097	0.0814243	-0.0585133	-0.500589	0.0827903	-0.50295	-0.365254
Shikonin_0.5205	protease inhibitor	-0.369372	-0.392149	-0.0259644	0.238743	0.0905161	-0.265852	-0.6198	-0.524888	-0.6198	-0.524888	-0.53089	-0.555804	-0.577	-0.265852	-0.141187	0.468632	0.162667	0.180577	0.0697987	0.0811909	0.124569	0.0811909	0.124569	0.17343	0.569143	0.685787	-0.553845	-0.462379	0.646199	0.329153	-0.225966	-0.336764	-3.11404e-05	-0.0828188	-0.256412	-0.258963	-0.154901	0.461515	0.127448	-0.687027	-0.312509	-0.0720726	-0.0270158	-0.323476	-0.619241	-0.0294281	-0.620277	-0.868881
Staurosporine_0.012855	kinase inhibitor	0.101872	-0.169241	0.144476	0.253787	0.399923	-0.452733	-0.78472	-0.804717	-0.78472	-0.804717	-0.587603	-0.780088	-0.788613	-0.452733	-0.792134	0.507671	0.662804	0.564598	0.382302	-0.382056	-0.828823	-0.382056	-0.828823	-0.880185	-0.174575	-0.225633	-0.470383	-0.477067	-0.294625	-0.407591	0.0610336	-0.251141	0.51972	0.343474	0.102426	-0.527789	-0.78708	0.481765	0.497562	-0.0227819	-0.111879	-0.38636	-0.495358	-0.00230829	-0.721364	0.413846	-0.722462	-0.774141
Staurosporine_0.06435	kinase inhibitor	-0.112544	-0.207956	0.0238886	0.306143	0.333465	-0.591356	-0.541073	-0.552805	-0.541073	-0.552805	-0.599562	-0.529262	-0.764052	-0.591356	-0.505296	0.627579	0.575423	0.534234	0.525253	-0.516273	-0.641619	-0.516273	-0.641619	-0.843927	-0.133532	-0.30366	-0.523826	-0.407818	-0.457077	-0.711613	-0.11698	-0.412418	0.636983	0.234319	0.0744511	-0.523924	-0.56516	0.673062	0.549581	-0.0067039	-0.041751	-0.367278	-0.583767	0	-0.480561	0.524335	-0.480874	-0.727521
Staurosporine_1.605	kinase inhibitor	-0.532312	-0.521999	0.146644	0.0696372	0.0524448	-0.606656	-0.280021	-0.603955	-0.280021	-0.603955	-0.525414	-0.669297	-0.853679	-0.606656	-0.587715	0.709593	0.615053	0.623522	0.676163	-0.252062	-0.400328	-0.252062	-0.400328	-0.292241	-0.309656	-0.26182	-0.523562	-0.566751	-0.0239286	-0.0575479	-0.112483	-0.398798	0.105118	0.0723466	-0.103254	-0.60139	-0.567356	0.653509	0.615785	-0.720434	-0.236538	-0.426273	-0.464219	-0.271985	-0.436003	0.06264	-0.412685	-0.110329
Staurosporine_0.321	kinase inhibitor	-0.0625923	-0.21563	0.232333	0.239564	0.308882	-0.60716	-0.6198	-0.587668	-0.6198	-0.587668	-0.568557	-0.555804	-0.577	-0.60716	-0.480193	0.596492	0.57952	0.475255	0.3099	-0.159386	-0.572497	-0.159386	-0.572497	-0.43766	-0.362949	-0.240789	-0.50847	-0.640672	-0.411928	-0.316667	-0.128694	-0.334392	-3.11404e-05	-0.0828188	-0.15478	-0.626359	-0.455787	0.599489	0.578899	-0.687027	-0.67315	-0.472603	-0.50867	-0.207265	-0.619241	0.194328	-0.620277	-0.868881
TRIM_3.54	bNOS/NOS inhibitor	-0.208385	-0.215263	-0.0464668	-0.220007	-0.145701	-0.0836143	-0.626114	-0.604462	-0.626114	-0.604462	-0.519661	-0.137287	-0.534235	-0.0836143	-0.090332	-0.00775909	-0.00664902	-0.0943947	-0.0902958	-0.0359535	-0.118326	-0.0359535	-0.118326	-0.129521	-0.058197	0	-0.0155125	-0.199326	-0.153584	-0.0255146	-6.10352e-05	-6.10352e-05	-0.000976562	-0.0249634	-6.10352e-05	-0.0794868	-0.0970078	-0.01614	-0.0025444	0.0442772	0.127211	-0.0628223	-0.145565	0.0699234	-0.411983	-0.161499	-0.530636	-0.259632
TRIM_0.7065	bNOS/NOS inhibitor	0.298815	0.277391	-0.108778	-0.0940361	-0.0509491	-0.0766315	-0.492071	-0.484486	-0.492071	-0.484486	-0.533543	-0.467602	-0.501041	-0.0766315	-0.019371	0.00772476	-0.102726	0	-0.0297623	-0.000829697	-0.0463657	-0.000829697	-0.0463657	-0.0210514	-0.013298	-0.0227108	0.0715427	-0.0262032	-0.0829067	-0.0121078	-0.0825062	-0.0915394	-0.0705433	-0.0303307	-0.0851288	0.0153732	-0.0299129	0	-0.098362	0.135502	0.133076	0.0022583	-0.0342598	0.00621414	-0.496901	0.0669918	-0.495277	-0.542967
Tamoxifen_0.4035	estrogen antagonist	-0.0625923	-0.0610386	0.061016	-0.0921212	-0.0502677	-0.219325	-0.120602	-0.205587	-0.120602	-0.205587	-0.207578	-0.268147	-0.200605	-0.219325	-0.0308352	0.249951	-0.00265051	0.13018	0.0383218	0.0102506	-0.0250638	0.0102506	-0.0250638	-0.0382457	-0.0205944	0.0149239	0.188122	0.0252978	0.00184164	-0.00542279	-0.0243759	0.01687	-3.11404e-05	-0.0017641	0.0123416	-0.209646	-0.091215	0.37324	-0.00293607	-0.293347	0.0689422	-0.152813	-0.0270158	-0.137929	-0.197157	-0.0294281	-0.19882	-0.1886
Tanshinone IIA_0.10185	AP-1 inhibitor	-0.108652	-0.158034	-0.041935	0.0752506	0.087532	0.0554714	-0.337305	-0.323368	-0.337305	-0.323368	0.129412	-0.357576	-0.300348	0.0554714	-0.0599442	0.0200634	-0.065176	0.208645	-0.0374908	0.539951	0.399996	0.539951	0.399996	0.09849	0.628696	0.230042	0.155172	0.00977316	0.496319	0.319918	-0.308218	-0.375246	-0.00686264	-0.0286331	-0.2134	0.0648499	-0.0949955	0.015934	-0.0673866	-0.0380854	-0.0318775	0.00683975	-0.123835	-0.00348751	-0.289631	-0.279848	-0.289011	-0.350836
Tanshinone IIA_0.51	AP-1 inhibitor	-0.29906	-0.312991	-0.0842419	0.318645	0.20195	0.131075	-0.536016	-0.469715	-0.536016	-0.469715	-0.461887	-0.460278	-0.4538	0.131075	0.149254	0.00772476	0.0330238	0	0.113014	-0.226904	-0.0463657	-0.226904	-0.0463657	0.493219	-0.329704	0.651373	-0.381005	0.292316	-0.194479	0.672997	-0.139147	-0.140856	-0.00486946	0.107479	-0.142258	0.168205	0.11939	0	0.0242653	-0.411452	-0.0968208	0.12677	0.110432	-0.0547981	-0.544874	-0.108496	-0.543251	-0.659422
Taxol = Paclitaxel_0.00702	microtubule poison	0.176994	0.0588531	0.331558	0.142832	0.327029	0.0671653	-0.565691	-0.504668	-0.565691	-0.504668	-0.427203	-0.381511	-0.491703	0.0671653	-0.0240675	0.492046	0.490061	0.507121	0.500749	0.56117	0.504728	0.56117	0.504728	0.496326	0.830174	0.692011	-0.160528	-0.573816	0.67643	0.594952	0.498475	-0.123037	0.581352	0.707081	0.429493	0.0536334	-0.0141659	0.505203	0.391659	-0.0227819	-0.111879	0.232517	0.140657	-0.00230829	-0.58754	0.491971	-0.588603	-0.630656
Taxol = Paclitaxel_0.0351	microtubule poison	0.427715	0.069234	0.559781	0.300074	0.426936	0.161633	-0.541073	-0.552666	-0.541073	-0.552666	-0.552199	-0.403948	-0.514052	0.161633	-0.012411	0.549454	0.497298	0.637332	0.490368	0.542904	0.499026	0.542904	0.499026	0.406078	0.607149	0.648619	-0.397326	-0.521727	0.61077	0.482958	0.48154	-0.0373918	0.933858	0.767569	0.592587	0.134205	-0.0471978	0.5715	0.487081	-0.0067039	-0.041751	0.389739	0.354275	0	-0.480561	0.558224	-0.480874	-0.413277
Taxol = Paclitaxel_0.1755	microtubule poison	0.0467581	-0.21563	0.545251	0.227404	0.432627	-0.0945346	-0.517017	-0.463016	-0.517017	-0.463016	-0.424724	-0.356869	-0.462498	-0.0945346	0.0952883	0.526667	0.565185	0.542963	0.617267	0.700122	0.60277	0.700122	0.60277	0.562869	0.588241	0.81631	-0.448097	-0.586821	0.663323	0.660278	0.144214	-0.0942974	0.244451	0.39769	0.1123	-0.0878897	0.107886	0.537512	0.563727	-0.687027	-0.67315	0.0340564	0.195682	-0.323476	-0.550951	0.194328	-0.570682	-0.561054
Taxol = Paclitaxel_0.879	microtubule poison	0.0151683	-0.284848	0.696588	0.522483	0.598762	-0.0587342	-0.0319388	-0.354792	-0.0319388	-0.354792	-0.469541	-0.04067	-0.370839	-0.0587342	0.125626	0.709593	0.677553	0.623732	0.629428	0.736995	0.626646	0.736995	0.626646	0.681052	0.580722	0.821297	-0.441392	-0.549731	0.81885	0.75021	0.299146	-0.0101262	0.436172	0.630103	0.288522	-0.0473996	0.0843064	0.653509	0.63141	-0.720434	-0.236538	0.0365548	0.271697	-0.503331	-0.0486565	0.625	-0.11595	-0.110329
Tetrandrine_1.2045	Calcium channels	-0.256915	-0.222616	-0.338459	-0.120153	-0.102135	-0.581905	-0.642715	-0.599579	-0.642715	-0.599579	-0.565071	-0.562702	-0.833063	-0.581905	-0.360962	0.671333	0.158504	0.0731544	-0.0325565	0.0359535	-0.465372	0.0359535	-0.465372	-0.129521	-0.0135193	0	-0.0780125	-0.024765	-0.0918159	-0.146608	-6.10352e-05	-6.10352e-05	-0.000976562	-0.0249634	-6.10352e-05	-0.571064	-0.325645	0.684597	0.202984	-0.679897	-0.368177	-0.489824	-0.145565	-0.0613785	-0.779415	-0.161499	-0.735836	-0.259632
Thapsigargin_0.009225	Calcium channels	-0.0997765	-0.0701833	-0.168623	0.0276604	0.091507	-0.247776	-0.547266	-0.541185	-0.547266	-0.541185	-0.436329	-0.534325	-0.518661	-0.247776	-0.189407	0.235363	0.154396	0.0737381	0.0709438	-0.139164	-0.259369	-0.139164	-0.259369	-0.459038	-0.611641	-0.582579	0.403425	-0.0810318	-0.335022	-0.423435	0.0300269	-0.0533035	0.141471	-0.0647793	0.0255455	-0.204819	-0.182907	0.202244	0.176516	-0.00444794	-0.111409	-0.188801	-0.191353	-0.00346021	-0.512136	0.161973	-0.509033	-0.516012
Thapsigargin_0.04605	Calcium channels	-0.112022	-0.0684198	-0.474918	-0.152521	-0.109138	-0.251516	-0.483179	-0.411015	-0.483179	-0.411015	-0.341692	-0.47513	-0.413996	-0.251516	-0.381233	0.137007	0.322256	0.026516	0.103653	-0.124058	-0.326143	-0.124058	-0.326143	-0.418833	-0.389927	-0.424866	0.429342	0.404963	-0.341045	-0.632418	-0.0829983	-0.161745	-0.0368919	-0.30854	-0.155905	-0.185577	-0.422388	0.123844	0.298832	-0.0380854	-0.0318775	-0.196659	-0.440485	-0.00348751	-0.458942	-0.108828	-0.458323	-0.741339
Thapsigargin_0.231	Calcium channels	-0.128656	-0.132905	0.129896	0.169476	0.153244	-0.352388	-0.28919	-0.33556	-0.28919	-0.33556	-0.280857	-0.360058	-0.280216	-0.352388	0.0165634	0.101475	0.125065	0.015625	0.0777359	-0.0513668	-0.131449	-0.0513668	-0.131449	-0.0210514	-0.177361	-0.0227108	-0.396494	0.295979	-0.0829067	-0.0121078	-0.0483265	-0.0536976	0.117052	0.0863609	-0.0511932	-0.0527267	0.0285702	0.34375	0.144016	-0.731765	-0.260517	-0.0415649	0.00789261	-0.0547981	-0.41902	0.225317	-0.418251	-0.557859
Tosyl-Phe-CMK (TPCK)_0.426	protease inhibitor	-0.072896	-0.0931995	0.309095	0.266209	0.254983	0.0751667	-0.490118	-0.359486	-0.490118	-0.359486	-0.231907	-0.384594	-0.352848	0.0751667	0.445152	0.00772476	0.205387	0.015625	0.582497	-0.226904	-0.0750523	-0.226904	-0.0750523	0.0120182	-0.329704	-0.0227108	-0.481699	0.344685	-0.194479	-0.0121078	0.066637	0.0702991	0.12401	0.481014	0.0660858	0.105217	0.482916	0.140625	0.22031	-0.731765	-0.343647	0.0845337	0.407795	-0.0547981	-0.544874	0.0813961	-0.543251	-0.79199
Trequinsin_1.845	phosphodiesterase inhibitor	-0.170793	-0.211097	-0.128986	0.275671	-0.144537	-0.119991	-0.583389	-0.540497	-0.583389	-0.540497	-0.424568	-0.611042	-0.582575	-0.119991	-0.0457764	0.137276	0.158504	0.0615578	0.123377	0.0359535	-0.00248146	0.0359535	-0.00248146	0.130073	-0.0135193	0.375	0.113657	-0.159897	0.0678902	0.441896	-0.0635376	-0.252014	-0.000976562	-0.0249634	-0.0635376	-0.052021	-0.0970078	0.12466	0.202984	-0.679897	-0.307753	-0.0249805	-0.145565	-0.0613785	-0.779415	0.0443115	-0.735836	-0.259632
Trichostatin-A_0.0198	histone deacetylase inhibitor	0.220465	0.129829	0.380874	0.209784	0.410665	0.230565	-0.78472	-0.553043	-0.78472	-0.553043	-0.704791	-0.479516	-0.788613	0.230565	0.0690242	0.545408	0.435893	0.569202	0.451777	0.652145	0.543701	0.652145	0.543701	0.445754	0.660066	0.639696	0.0296186	-0.476578	0.595023	0.491436	-0.145262	-0.257105	0.419274	0.408206	-0.146336	0.24082	0.0738757	0.543568	0.430528	-0.0227819	-0.111879	0.157042	-0.15398	-0.00230829	-0.721364	-0.0732347	-0.722462	-0.774141
Trichostatin-A_0.09915	histone deacetylase inhibitor	0.095645	-0.10628	0.599572	0.296482	0.473288	0.0656861	-0.541073	-0.552666	-0.541073	-0.552666	-0.591889	-0.402658	-0.506239	0.0656861	0.0514037	0.517436	0.50246	0.600048	0.518731	0.138274	0.189959	0.138274	0.189959	0.189978	0.276528	0.608766	-0.194515	-0.515833	0.233375	0.18678	-0.052527	-0.274988	0.457679	0.459208	-0.0286921	0.12573	0.05508	0.498083	0.463644	-0.0067039	-0.041751	0.0123674	-0.0223132	0	-0.480561	0.0112563	-0.480874	-0.476962
Trichostatin-A_2.475	histone deacetylase inhibitor	-0.0737926	-0.195026	0.146644	0.522483	0.345135	-0.231446	-0.280021	-0.603955	-0.280021	-0.603955	-0.600853	-0.669297	-0.853679	-0.231446	0.0313531	0.300622	0.0293947	0.307046	0.0510238	-0.252062	-0.0871302	-0.252062	-0.0871302	-0.0186637	-0.309656	-0.26182	-0.162967	0.324459	-0.0239286	-0.0575479	0.0301729	0.0342613	0.105118	0.0723466	0.0348944	-0.112934	0.0124593	0.35231	0.0883716	-0.424362	-0.236538	-0.129293	-0.138745	-0.0953263	-0.436003	4.67106e-07	-0.412685	-0.110329
Trichostatin-A_0.4965	histone deacetylase inhibitor	0.190941	0.137435	0.26442	0.240559	0.308255	-0.0058069	-0.567519	-0.588784	-0.567519	-0.588784	-0.575428	-0.459269	-0.577	-0.0058069	0.176517	0.475189	0.257394	0.475255	0.470375	0.0102506	0.426291	0.0102506	0.426291	0.228675	-0.000226079	0.604419	-0.17609	-0.462937	-0.00707323	0.263828	0.144214	0.0535608	-3.11404e-05	0.0698793	0.1123	0.00972981	0.2091	0.460259	0.212653	-0.354633	-0.277689	-0.0225818	0.0711704	-0.0604664	-0.619241	-0.0294281	-0.620277	-0.736382
Trifluoperazine_1.56	dopamine antagonist	-0.523304	-0.5301	-0.31967	-0.134718	-0.231016	-0.522043	-0.280021	-0.603955	-0.280021	-0.603955	-0.876384	-0.669297	-0.853679	-0.522043	-0.156074	0.607821	0.387165	0.517112	0.448276	-0.142234	-0.275153	-0.142234	-0.275153	-0.176971	-0.309656	-0.26182	-0.375648	-0.551091	-0.0239286	-0.0575479	-0.418566	-0.500395	-0.00257874	-0.0334934	-0.446306	-0.523823	-0.148411	0.614203	0.393129	-0.720434	-0.236538	-0.290775	-0.0344269	-0.503331	-0.436003	-0.21031	-0.412685	-0.110329
Triptolide_0.01665	Inhibits transcription	-0.0989187	-0.0979407	0.166059	0.293041	0.298782	0.55405	-0.549707	-0.538256	-0.549707	-0.538256	-0.804493	-0.535301	-0.76915	0.55405	0.468826	-0.208508	-0.364235	0.476448	0.0709438	-0.248051	0.1716	-0.248051	0.1716	-0.200249	-0.815498	-0.850401	0.465342	-0.313454	-0.479797	-0.474216	-0.10037	-0.101281	-0.228235	0.279501	-0.099994	0.550034	0.466721	-0.240574	-0.370241	0.252739	0.410551	0.466145	0.320747	-0.00346021	-0.535086	-0.245888	-0.531982	-0.771872
Triptolide_0.08325	Inhibits transcription	-0.0479292	0.0389162	0.35944	0.360773	0.4701	0.509451	-0.483179	-0.383671	-0.483179	-0.383671	-0.718523	-0.476595	-0.684748	0.509451	0.520638	-0.265547	-0.214224	0.208645	0.0553131	-0.521519	0.0654011	-0.521519	0.0654011	-0.047816	-0.389927	-0.424866	0.407871	-0.485386	-0.798077	-0.632418	-0.222525	-0.161745	-0.169827	0.311348	-0.234518	0.508331	0.584009	-0.351139	-0.295902	0.257479	0.53554	0.478275	0.281183	0.0364599	-0.458942	-0.279848	-0.458323	-0.741339
Triptolide_2.085	Inhibits transcription	-0.164022	-0.141734	0.210041	0.264196	0.297049	0.213619	-0.642715	-0.556854	-0.642715	-0.556854	-0.565071	-0.605183	-0.833063	0.213619	0.418091	0.244942	-0.285702	0.622349	0.017786	0.605289	0.50004	0.605289	0.50004	-0.014264	-0.551361	0	0.392967	0.343369	-0.158588	-0.277468	-0.252014	-0.142151	-0.000976562	0.0473022	-0.252014	0.215473	0.433189	0.349148	-0.253033	-0.532558	0.262953	0.0663624	0.244686	-0.00669098	-0.779415	-0.161499	-0.735836	-0.259632
Triptolide_0.4155	Inhibits transcription	-0.0975284	-0.0835794	0.164564	0.255291	0.295334	0.333467	-0.536016	-0.530506	-0.536016	-0.530506	-0.838352	-0.506176	-0.750553	0.333467	0.334801	0.00772476	-0.24445	0	-0.0131607	-0.226904	-0.00840187	-0.226904	-0.00840187	0.0543766	-0.329704	-0.0227108	0.356577	0.494221	-0.194479	-0.0121078	-0.139147	-0.140856	-0.0705433	0.0704918	-0.142258	0.213005	0.344244	0	-0.168919	-0.304191	0.17458	0.0540161	0.188068	-0.00706863	-0.544874	-0.0252438	-0.543251	-0.79199
Tunicamycin_0.008355	protein glycosylation inhibitor	-0.193562	0.185739	-0.148662	-0.220049	-0.101513	-0.3315	-0.271257	-0.379494	-0.271257	-0.379494	-0.255084	-0.261359	-0.360809	-0.3315	-0.1867	0.327983	0.0681473	-0.0563674	0.0309138	-0.00328905	-0.0789969	-0.00328905	-0.0789969	-0.0535942	-0.174575	-0.028507	0.0116106	-0.0527501	-0.056065	-0.010828	-0.177245	-0.183375	-0.0292069	-0.181365	-0.220694	-0.275453	-0.176973	0.301659	0.038508	-0.0227819	-0.111879	-0.393545	-0.20218	-0.00230829	-0.27511	-0.183726	-0.275406	-0.271944
Tunicamycin_0.0417	protein glycosylation inhibitor	-0.138051	-0.0849899	-0.457134	-0.112644	-0.0846509	-0.308153	-0.399959	-0.465532	-0.399959	-0.465532	-0.315173	-0.453927	-0.360662	-0.308153	-0.445307	0.278283	0.440518	0.00437958	-0.0446793	-0.00336877	-0.164603	-0.00336877	-0.164603	-0.44521	-0.133532	-0.30366	0.43018	0.234687	-0.05864	-0.51058	0.0468769	-0.104571	0.0389431	-0.0186385	-0.0293199	-0.207901	-0.510891	0.244909	0.378962	-0.0067039	-0.041751	-0.182289	-0.50334	0	-0.407738	0.0493074	-0.408992	-0.464546
Tunicamycin_0.2085	protein glycosylation inhibitor	-0.0625923	-0.0788284	-0.10831	0.189983	-0.0770186	-0.498343	-0.425883	-0.53713	-0.425883	-0.53713	-0.418725	-0.446498	-0.577907	-0.498343	-0.0769429	0.304778	0.0484094	-0.00852795	0.0697987	0.0102506	-0.0435487	0.0102506	-0.0435487	0.0251667	-0.0205944	-0.0341064	0.430903	0.0511767	0.00184164	-0.067295	0.021795	0.0535608	-3.11404e-05	0.0457094	0.0466956	-0.489187	-0.091215	0.211096	0.0283616	-0.273087	-0.080255	-0.472603	-0.0747976	-0.207265	-0.518516	-0.0294281	-0.521505	-0.571308
Tunicamycin_1.044	protein glycosylation inhibitor	-0.517578	-0.512624	-0.0354901	0.0220996	-0.0216831	-0.522043	-0.280021	-0.603955	-0.280021	-0.603955	-0.531238	-0.45271	-0.853679	-0.522043	-0.210413	0.607821	0.575956	0.538771	0.548896	-0.000248812	-0.0871302	-0.000248812	-0.0871302	-0.0186637	-0.00946792	0.010146	-0.256368	-0.0189341	-2.80263e-06	0.004395	-0.0450306	-0.136068	0.105118	-0.0112417	-0.0392889	-0.505512	-0.369811	0.668855	0.615715	-0.720434	-0.236538	-0.418391	-0.173238	-0.271985	-0.436003	4.67106e-07	-0.412685	-0.110329
Tyrphostin 9_0.1062	kinase inhibitor	-0.242852	-0.150379	-0.215086	0.0729884	-0.0113739	-0.0170673	-0.456523	-0.392549	-0.456523	-0.392549	0.0283779	-0.519775	-0.405235	-0.0170673	0.00648187	-0.00529916	-0.0782482	-0.00368204	-0.0135339	-0.0897248	-0.0330812	-0.0897248	-0.0330812	-0.0763833	-0.133532	-0.158431	0.186179	-0.0140189	-0.0195775	-0.249141	-0.354389	-0.274988	-0.130008	-0.0858818	-0.352632	0.00341579	0.0131227	-0.0133595	-0.11393	-0.0067039	-0.0176857	-0.00797287	-0.0653168	0	-0.30757	-0.572082	-0.309313	-0.271815
Tyrphostin 9_0.531	kinase inhibitor	-0.369372	-0.350546	-0.10831	0.18217	-0.0547669	-0.380179	-0.573971	-0.587109	-0.573971	-0.587109	-0.534099	-0.434784	-0.585719	-0.380179	-0.131909	0.304778	0.257394	0.0624482	0.132526	-0.0223182	-0.174269	-0.0223182	-0.174269	-0.0397105	-0.000226079	-0.240789	-0.01548	0.266962	-0.0379745	-0.0129214	-0.0243759	-0.0942974	-3.11404e-05	0.0457094	-0.0373834	-0.369802	-0.118663	0.321552	0.212653	-0.461922	-0.371212	-0.264804	-0.0830287	-0.323476	-0.619241	-0.00034052	-0.620277	-0.620136
Tyrphostin AG-126_3.48	kinase inhibitor	-0.227564	-0.195026	0.0665657	0.353468	0.0524448	0.363143	-0.280021	-0.370208	-0.280021	-0.370208	-0.315767	-0.59473	-0.421236	0.363143	0.480642	0.153196	-0.0427875	0.548501	0.339947	-0.000248812	0.0424873	-0.000248812	0.0424873	0.168147	0.0141415	0.0354669	0.0718673	0.422359	0.0927762	0.192383	0.0301729	0.0342613	0.105118	0.0723466	0.0348944	0.377234	0.489789	0.167181	-0.0531107	-0.295696	-0.0955118	0.120748	0.299738	-0.0552513	-0.436003	4.67106e-07	-0.412685	-0.110329
Tyrphostin AG-825_1.89	kinase inhibitor	-0.0737926	-0.193717	0.480768	0.574311	0.48848	0.171039	-0.280021	-0.354792	-0.280021	-0.354792	0.0919946	-0.619179	-0.370839	0.171039	0.135741	0.367796	0.297949	0.591679	0.595248	-0.000248812	-0.00230875	-0.000248812	-0.00230875	-0.000422886	-0.309656	-0.26182	0.129694	0.542058	-0.0239286	-0.00753395	0.0301729	0.00656875	0.105118	0.104782	0.0348944	0.188792	0.158281	0.453872	0.36167	-0.720434	-0.138712	0.0365548	0.017372	-0.150014	-0.436003	4.67106e-07	-0.412685	-0.110329
Tyrphostin-8_4.41	calcineurin inhibitor	-0.416809	-0.377289	-0.0138313	0.127045	-0.000686957	-0.0110221	-0.280021	-0.354792	-0.280021	-0.354792	-0.332089	-0.571501	-0.370839	-0.0110221	0.125626	0.00618853	-0.109752	0.0368176	-0.0227733	-0.000248812	0.0424873	-0.000248812	0.0424873	-0.000422886	-0.0626557	-0.00275203	0.421791	0.0937109	0.022952	0.048131	-0.112483	-0.110991	-0.030899	0.0207283	-0.103254	-0.0100809	0.151724	0.0601779	-0.12583	-0.357314	0.193469	-0.0954275	0.017372	-0.0779468	-0.436003	4.67106e-07	-0.412685	-0.110329
U73122_1.62	phospholipase inhibitor	0.0151683	-0.0231687	0.0665657	0.0827162	0.0524448	-0.261197	-0.0606428	-0.145877	-0.0606428	-0.145877	-0.16426	-0.161206	-0.208241	-0.261197	-0.157853	0.369609	0.297949	0.157667	0.0763796	-0.0163272	-0.0290945	-0.0163272	-0.0290945	-0.0186637	0.0141415	-0.00275203	-0.147516	0.32697	0.0927762	0.048131	0.0301729	-0.0101262	0.105118	0.000359983	0.0348944	-0.27302	-0.176243	0.361168	0.27929	-0.384043	-0.236538	-0.290775	-0.0615266	-0.271985	-0.013291	4.67106e-07	-0.00671418	0.01616
Valinomycin_0.0054	mitochondrial uncoupler	0.0725774	0.108652	0.144476	0.089454	0.234675	0.0763031	-0.399117	-0.398049	-0.399117	-0.398049	0.0558651	-0.510138	-0.465511	0.0763031	0.0713959	0.0455475	0.0433845	0.193714	0.12714	-0.00328905	-0.00216239	-0.00328905	-0.00216239	-0.0212978	-0.174575	-0.225633	0.130003	-0.0445191	-0.294625	-0.407591	-0.246057	-0.210474	-0.114796	-0.0366938	-0.238273	0.0828954	0.0678071	0.00733014	0.0278007	-0.0227819	-0.111879	0.071872	0.0295379	-0.00230829	-0.295373	-0.299937	-0.296297	-0.413615
Valinomycin_0.027	mitochondrial uncoupler	-0.0285186	-0.0259554	-0.0189709	0.135837	0.258095	0.0656861	-0.359631	-0.351426	-0.359631	-0.351426	0.114978	-0.457101	-0.389715	0.0656861	0.0444632	0.0333405	0.0881882	0.0995247	0.156042	-0.00336877	0.00999248	-0.00336877	0.00999248	0.0584215	-0.133532	-0.30366	0.0796641	-0.0554182	-0.144577	-0.188733	-0.277729	-0.205609	-0.130008	0.000711558	-0.162551	0.12573	0.016157	0.0190096	0.0380022	-0.0067039	-0.041751	0.0123674	0.028033	0	-0.30757	-0.364109	-0.309313	-0.314574
Valinomycin_0.135	mitochondrial uncoupler	-0.0444562	-0.0610386	0.061016	0.189162	0.148482	0.015154	-0.612127	-0.588784	-0.612127	-0.588784	-0.0144977	-0.513957	-0.589486	0.015154	0.127306	0.0359796	0.0484094	0.112044	0.129994	-0.000659398	0.0103456	-0.000659398	0.0103456	0.0433378	-0.0205944	0.0149239	0.142991	-0.0183921	0.00184164	0.055088	-0.0243759	-0.0942974	-3.11404e-05	0.0457094	-0.0373834	0.00972981	0.107886	0.0210151	0.0283616	-0.354633	-0.157245	0.00357367	0.0711704	-0.0373428	-0.607662	-0.0294281	-0.609395	-0.620136
Valinomycin_0.675	mitochondrial uncoupler	-0.259686	-0.377289	-0.0138313	0.353468	0.0524448	-0.261197	-0.280021	-0.603955	-0.280021	-0.603955	-0.515613	-0.664972	-0.853679	-0.261197	0.0313531	0.367796	0.0496583	0.109432	0.0763796	-0.000248812	-0.0871302	-0.000248812	-0.0871302	-0.000422886	-0.309656	-0.26182	0.0245389	0.28285	-0.0239286	-0.00753395	0.0301729	-0.110991	0.105118	0.0723466	0.0051092	-0.240027	0.043221	0.570502	0.0883716	-0.424292	-0.236538	-0.0954275	0.017372	-0.0504678	-0.436003	4.67106e-07	-0.412685	-0.110329
Vinblastine_0.0066	microtubule poison	0.142462	0.0590713	0.28459	0.196175	0.368851	0.157916	-0.46936	-0.495844	-0.46936	-0.495844	-0.476415	-0.479516	-0.475206	0.157916	0.177492	0.437358	0.342387	0.569621	0.493804	0.650331	0.59389	0.650331	0.59389	0.602039	0.59059	0.613886	-0.236235	-0.455233	0.684239	0.649221	-0.748568	-0.730878	-0.852031	-0.662496	-0.761571	0.161683	0.238182	0.450515	0.325687	-0.0227819	-0.111879	0.259128	0.352745	0.0407859	-0.460517	-0.780196	-0.461511	-0.484311
Vinblastine_0.033	microtubule poison	0.14238	-0.0259554	0.490337	0.280682	0.475675	0.0510377	-0.538559	-0.410382	-0.538559	-0.410382	-0.465704	-0.519775	-0.465607	0.0510377	0.0719116	0.557266	0.465909	0.637332	0.566757	0.647412	0.525827	0.647412	0.525827	0.436351	0.658364	0.685077	-0.244459	-0.432441	0.647228	0.654275	-0.515452	-0.451332	-0.454087	-0.166378	-0.587704	0.0929108	0.035758	0.548062	0.440172	0.0286068	0.0188367	0.111977	0.125654	0	-0.42699	-0.630257	-0.427581	-0.348161
Vinblastine_0.165	microtubule poison	0.255324	0.0778333	0.574967	0.337765	0.464679	-0.185773	-0.612127	-0.526423	-0.612127	-0.526423	-0.418725	-0.513782	-0.526777	-0.185773	0.0952883	0.54163	0.625872	0.573609	0.481731	0.277131	0.475608	0.277131	0.475608	0.543721	0.659057	0.670407	0.131621	-0.230132	0.602811	0.65672	-0.0243759	-0.0942974	-3.11404e-05	0.0457094	-0.0373834	-0.176443	0.107886	0.560147	0.579492	-0.687027	-0.67315	-0.00434097	0.0711704	-0.323476	-0.563682	0.194328	-0.565241	-0.620136
Vinblastine_0.825	microtubule poison	0.306335	-0.0700262	0.614208	0.522483	0.598762	-0.322197	-0.280021	-0.494789	-0.280021	-0.494789	-0.589274	-0.283834	-0.853679	-0.322197	0.0313531	0.709453	0.611914	0.620872	0.628137	0.234624	0.0666572	0.234624	0.0666572	0.644222	0.602241	0.636402	-0.0255155	-0.204621	0.489888	0.765835	-0.112483	-0.398798	0.105118	0.0723466	-0.103254	-0.301585	0.0124593	0.71587	0.611809	-0.720434	-0.236538	-0.0954275	0.017372	-0.271985	-0.436003	0.140835	-0.412685	-0.110329
Vinpocetine_2.145	phosphodiesterase inhibitor	-0.27689	-0.305337	-0.152058	0.130651	-0.0443529	0.0897179	-0.546402	-0.535248	-0.546402	-0.535248	-0.288826	-0.559772	-0.477839	0.0897179	-0.0324707	-0.00775909	-0.0669518	0.0593605	-0.0910282	-0.194889	-0.0287266	-0.194889	-0.0287266	-0.145024	-0.357758	0	0.0366306	-0.212509	-0.187031	-0.277468	-0.252014	-0.252014	-0.000976562	-0.0249634	-0.252014	0.0395699	0.0204697	-0.000514984	0.0589409	-0.532558	-0.148939	-0.0249805	-0.0200768	-0.0105972	-0.572262	0.0032959	-0.735836	-0.259632
W7_1.995	calmodulin inhibitor	-0.538196	-0.57687	0.0665657	0.0220996	-0.0216831	-0.398264	-0.0833827	-0.416874	-0.0833827	-0.416874	-0.469541	-0.326035	-0.518509	-0.398264	-0.407016	0.476996	0.479381	0.304326	0.349503	0.234624	0.0231305	0.234624	0.0231305	0.0134321	0.157801	0.010146	0.233663	0.304474	0.271696	0.192383	-0.29517	-0.43528	0.141006	0.0723466	-0.405151	-0.384139	-0.406084	0.540681	0.461523	-0.720434	-0.236538	-0.290775	-0.238982	-0.503331	-0.436003	0.140835	-0.412685	-0.110329
Wiskostatin_0.3525	N-WASP inhibitor	-0.05757	-0.0744988	-0.10831	-0.1444	-0.0770186	-0.520455	-0.0697163	-0.350816	-0.0697163	-0.350816	-0.478016	0.193487	-0.36962	-0.520455	-0.131909	0.141379	0.129813	-0.0796077	0.0383218	-0.0223182	-0.286504	-0.0223182	-0.286504	-0.0382457	-0.362949	-0.240789	0.115334	0.257476	-0.115751	-0.0129214	0.021795	0.0535608	-3.11404e-05	-0.0266664	0.0466956	-0.5678	-0.118663	0.0695991	0.0925357	-0.374894	-0.173097	-0.264804	-0.0747976	-0.0360523	-0.289302	-0.0294281	-0.291454	-0.384785
Wortmannin_1.755	kinase inhibitor	-0.259686	-0.500333	0.146644	0.353468	0.0524448	-0.231446	-0.280021	-0.354792	-0.280021	-0.354792	-0.461624	-0.547994	-0.370839	-0.231446	-0.0633704	0.631572	0.461593	0.573787	0.484548	0.234624	0.122077	0.234624	0.122077	0.133201	0.602241	0.0920377	-0.0478369	0.112719	0.489888	0.277274	0.278499	0.0342613	0.306534	0.168468	0.288522	-0.209718	-0.0446858	0.631885	0.449735	-0.720434	-0.236538	-0.0954275	-0.0615266	-0.271985	-0.436003	0.140835	-0.412685	-0.110329
Wortmannin_0.3495	kinase inhibitor	-0.177548	-0.195169	-0.0496112	0.271634	-0.0502677	-0.219325	-0.199564	-0.350816	-0.199564	-0.350816	-0.418725	-0.0808037	-0.4264	-0.219325	-0.0997875	0.0730541	-0.0131834	-0.0284428	-0.0691178	0.0102506	0.120627	0.0102506	0.120627	0.17343	-0.000226079	0.0149239	0.222337	0.143148	0.0851285	0.055088	-0.0243759	-0.0942974	-3.11404e-05	-0.0266664	-0.0373834	-0.209646	-0.139939	0.0695991	0.0283616	-0.231449	-0.27177	-0.0720726	-0.0747976	-0.0360523	-0.414337	-0.0294281	-0.417117	-0.415546
Y-27632_3.03	kinase inhibitor	-0.142246	-0.195026	-0.0138313	0.127045	0.0524448	-0.537389	-0.0117449	-0.354792	-0.0117449	-0.354792	-0.555583	0.00118894	-0.370839	-0.537389	-0.409283	0.595893	0.0293947	0.0368176	-0.0758564	-0.000248812	-0.0871302	-0.000248812	-0.0871302	-0.0186637	-0.309656	-0.0422331	0.317229	0.112719	-0.0239286	-0.00753395	-0.112483	-0.110991	0.0396881	-0.0533734	-0.103254	-0.523823	-0.369811	0.586685	0.0224536	-0.365205	-0.236538	-0.290775	-0.138745	-0.503331	-0.013291	4.67106e-07	-0.0378944	-0.110329
Y-27632_0.606	kinase inhibitor	-0.101934	-0.119209	-0.10831	-0.0784428	-0.0770186	-0.284127	0.072088	-0.0882604	0.072088	-0.0882604	-0.153972	0.0729301	-0.0706524	-0.284127	-0.253491	0.0359796	0.0484094	-0.0984415	-0.0546102	0.0102506	-0.0250638	0.0102506	-0.0250638	-0.0233531	-0.000226079	-0.00107761	0.0348718	0.0252978	-0.00707323	-0.0129214	-0.0243759	-0.0114291	-3.11404e-05	-0.0828188	-0.00923748	-0.369802	-0.205822	0.0695991	0.0925357	-0.172449	-0.126816	-0.00434097	-0.0747976	-0.0347619	-0.0709361	-0.0294281	-0.0713093	-0.139214
YC-1_2.46	Hif-1 inhibitor	-0.13487	-0.191919	-0.0138313	0.202624	0.0109409	-0.261197	-0.0833827	-0.354792	-0.0833827	-0.354792	-0.248035	-0.571501	-0.370839	-0.261197	-0.0271329	0.235262	0.0293947	0.0538028	-0.000940128	-0.000248812	-0.0290945	-0.000248812	-0.0290945	-0.000422886	-0.00946792	0.010146	0.173674	0.0530441	-2.80263e-06	0.004395	-0.0450306	-0.110991	0.0396881	0.000359983	-0.0392889	-0.240027	-0.0159819	0.220543	0.0224536	-0.407096	-0.138712	-0.290775	-0.0155584	-0.103715	-0.436003	4.67106e-07	-0.412685	-0.110329
YC-1_0.4935	Hif-1 inhibitor	-0.0184029	-0.0272921	-0.0259644	0.0474896	-0.0547669	0.0532399	-0.354454	-0.455308	-0.354454	-0.455308	0.033157	-0.483248	-0.34409	0.0532399	0.0258478	-0.0561038	-0.0799036	-0.0284428	-0.0713525	-0.0223182	-0.0250638	-0.0223182	-0.0250638	-0.0233531	-0.0205944	0.0149239	-0.0966394	-0.0389348	-0.0379745	-0.00542279	-0.0626711	-0.0942974	-3.11404e-05	0.00811176	-0.0373834	0.0571628	0.0209723	-0.069634	-0.07283	-0.0583084	0.116865	0.0340564	0.0252022	-0.0360523	-0.341409	-0.0294281	-0.34398	-0.189821
Z-Leu3-VS_0.010875	protease inhibitor	0.0725774	0.0680972	0.157346	0.134155	0.262786	0.0818486	-0.477905	-0.475895	-0.477905	-0.475895	-0.453919	-0.37614	-0.434191	0.0818486	0.269812	0.110663	0.0681473	0.214501	0.209939	0.239652	0.232247	0.239652	0.232247	0.15976	0.0378561	0.0188809	0.345156	-0.0441005	0.158813	0.0229653	-0.104735	-0.230738	0.0718966	0.174354	-0.0799997	0.0902894	0.273548	0.0939652	0.038508	-0.0227819	-0.111879	-0.10647	0.164757	-0.00230829	-0.343748	-0.113553	-0.395035	-0.413615
Z-Leu3-VS_0.0543	protease inhibitor	0.095645	0.069234	0.599572	0.213648	0.405347	0.545004	-0.541073	-0.505127	-0.541073	-0.505127	-0.552792	-0.529262	-0.764052	0.545004	0.506203	-0.00529916	0.0260021	0.600048	0.579836	-0.179778	0.111904	-0.179778	0.111904	0.189978	0.101584	-0.30366	-0.523826	0.398261	-0.27739	-0.51058	-0.142161	-0.205609	0.0889222	0.646708	-0.121187	0.530341	0.399249	-0.0574095	-0.00458978	0.0286068	0.0885214	0.20768	0.354275	0	-0.480561	0.0390186	-0.480874	-0.476962
Z-Leu3-VS_0.2715	protease inhibitor	-0.05757	-0.0744988	0.232333	0.337765	0.308882	0.669869	-0.6198	-0.525586	-0.6198	-0.525586	-0.575428	-0.555804	-0.832092	0.669869	0.411137	0.0301551	-0.0799036	0.468419	0.204113	-0.0223182	0.0103456	-0.0223182	0.0103456	0.408921	-0.0878377	-0.0341064	-0.208281	0.489897	-0.115751	-0.00542279	-0.0243759	-0.0942974	-3.11404e-05	0.0457094	-0.0373834	0.625208	0.428234	-0.0175971	-0.11402	-0.253053	-0.212683	0.188772	0.299686	-0.0585133	-0.619241	-0.0294281	-0.620277	-0.868881
Z-Leu3-VS_1.359	protease inhibitor	-0.227564	-0.223658	0.146644	0.449799	0.225087	0.0841597	-0.280021	-0.603955	-0.280021	-0.603955	-0.876384	-0.669297	-0.853679	0.0841597	0.480676	0.300622	-0.00707323	0.42528	0.356897	0.0119676	0.122077	0.0119676	0.122077	0.331791	-0.00946792	0.010146	0.463818	0.517051	0.139372	0.277274	-0.112483	-0.110991	0.00550842	0.0723466	-0.103254	0.0369364	0.484906	0.281997	-0.0116417	-0.471132	0.102233	0.00439796	0.181469	-0.0514803	-0.436003	4.67106e-07	-0.412685	-0.110329
Zardaverine_0.02235	phosphodiesterase inhibitor	0.249899	0.220674	-0.146894	-0.126415	-0.0973663	-0.072361	-0.502832	-0.479418	-0.502832	-0.479418	-0.429493	-0.472313	-0.511337	-0.072361	-0.0766144	-0.0254021	-0.0413589	-0.0727615	-0.0987759	-0.139164	-0.315277	-0.139164	-0.315277	-0.357597	-0.454659	-0.284361	-0.00388908	-0.116798	-0.479797	-0.422459	-0.116301	-0.0533035	0.0637745	-0.0401211	0.0702146	-0.0535736	-0.0740204	-0.0361061	-0.0742207	-0.00444794	-0.0466113	-0.188801	-0.0853958	-0.00346021	-0.470999	-0.0933759	-0.47937	-0.509665
Zardaverine_0.1119	phosphodiesterase inhibitor	-0.0479292	0.0823904	-0.174503	-0.0981998	-0.109138	-0.125784	-0.435816	-0.454716	-0.435816	-0.454716	-0.419695	-0.428255	-0.451349	-0.125784	-0.0599442	0.0253124	0.0743313	0.026516	-0.0293121	-0.144077	-0.170137	-0.144077	-0.170137	-0.335806	-0.222569	-0.424866	0.132956	-0.0153185	-0.305889	-0.430025	0.0484524	0.0521259	0.104275	0.023262	0.0746059	-0.0908508	-0.0200443	-0.0213051	-0.0673866	-0.0380854	-0.0318775	-0.080204	-0.123835	-0.00348751	-0.458942	-0.0358295	-0.458323	-0.593756
Zardaverine_2.79	phosphodiesterase inhibitor	-0.147111	0.15791	-0.0889473	-0.1724	-0.0887156	-0.0784874	-0.626114	-0.604462	-0.626114	-0.604462	-0.454597	-0.612507	-0.547907	-0.0784874	0.050415	0.00177765	-0.00664902	0.0593605	-0.00521278	-0.194889	-0.118326	-0.194889	-0.118326	-0.0598522	-0.551361	0	-0.211924	-0.0774994	-0.665668	-0.0255146	-6.10352e-05	-6.10352e-05	-0.000976562	-0.0249634	-6.10352e-05	-0.0769234	0.0329208	-0.000514984	-0.0025444	-0.206997	0.0249157	-0.0628223	0.00420761	-0.0105972	-0.779415	-0.161499	-0.735836	-0.259632
Zardaverine_0.5595	phosphodiesterase inhibitor	-0.353043	0.285234	-0.0909557	-0.143597	-0.0793915	-0.0766315	-0.490118	-0.530506	-0.490118	-0.530506	-0.538914	-0.45393	-0.438297	-0.0766315	-0.071373	0.00772476	-0.107975	0	-0.0776138	-0.226904	-0.128641	-0.226904	-0.128641	-0.0210514	-0.329704	-0.0227108	0.244028	0.0492744	-0.194479	-0.0121078	-0.0825062	-0.0915394	-0.0705433	-0.0105553	-0.0851288	-0.0429611	0.0158749	0	-0.141209	-0.0482169	0.340595	-0.216614	-0.091877	-0.0547981	-0.544874	-0.0512447	-0.543251	-0.659422
[truncated: 147 more columns]

## Sheet: Features and feature categories
Feature (name used by microscope software)	Simplified definition	Feature category		Notes
All_ACTIN_Mean_Cell_Aver_Intens_MultiWaveScoring_cyto	Cyto: Average Cellular Actin Pixel Intesity	actin intensity		Nucl:	Stain Set 1	Hoechst, pH3, EdU
All_ACTIN_Mean_Cyto_Aver_Intens_MultiWaveScoring_cyto	Cyto: Average Cytoplasmic Actin Pixel Intensity	actin intensity		Cyto:	Stain Set 2	Hoechst, Alexa-phalloidin, anti-tubulin Ab
All_ACTIN_Mean_Nucl_Integr_Intens_MultiWaveScoring_cyto	Cyto: Average Nuclear Actin Pixel Intensity	actin intensity
All_ACTIN_Mean_Stain_Area_MultiWaveScoring_cyto	Cyto: Average Area of Actin Stain	actin intensity
All_ACTIN_Mean_Stain_Integr_Intens_MultiWaveScoring_cyto	Cyto: Average Total Intensity of Actin	actin intensity
Cell_ACTIN_Cell_Average_Intensity_MultiWaveScoring_cyto	Cyto: Average Actin Pixel Intensity per Cell	actin intensity
Cell_ACTIN_Stained_Average_Intensity_MultiWaveScoring_cyto	Cyto: Average Pixel Intensity of Actin Stain per cell	actin intensity
Negative_ACTIN_Mean_Nucl_Integr_Intens_MultiWaveScoring_cyto	Cyto: Total Actin Pixel Intensity in nuclei of cells with less than 50µm2 staining	actin intensity
Negative_ACTIN_Mean_Stain_Area_MultiWaveScoring_cyto	Cyto: Average Area of Actin of cells with less than 50µm2 staining	actin intensity
Negative_ACTIN_Mean_Stain_Aver_Intens_MultiWaveScoring_cyto	Cyto: Average Actin Pixel Intensity with less than 50µm2 staining	actin intensity
Negative_ACTIN_Mean_Stain_Integr_Intens_MultiWaveScoring_cyto	Cyto: Total Actin Intensity with less than 50µm2 staining	actin intensity
Positive_ACTIN_Mean_Stain_Integr_Intens_MultiWaveScoring_cyto	Cyto: Total Actin Intensity with greater than 50µm2 staining	actin intensity
Cell_ACTIN_Cytoplasm_Average_Intensity_MultiWaveScoring_cyto	Cyto: Average Actin Pixel Intensity in the Cytoplasm per cell	actin localization
Cell_ACTIN_Nucleus_Average_Intensity_MultiWaveScoring_cyto	Cyto: Average Actin Pixel Intensity in the Nucleus per cell	actin localization
Negative_ACTIN_Mean_Cell_Aver_Intens_MultiWaveScoring_cyto	Cyto: Average Actin Pixel Intensity of cells with less than 50µm2 staining	actin localization
Negative_ACTIN_Mean_Cyto_Aver_Intens_MultiWaveScoring_cyto	Cyto: Average Actin Pixel Intensity in cytoplasm of cells with less than 50µm2 staining	actin localization
Negative_ACTIN_Mean_Nucl_Aver_Intens_MultiWaveScoring_cyto	Cyto: Average Actin Pixel Intensity in nuclei of cells with less than 50µm2 staining	actin localization
Positive_ACTIN_Mean_Cell_Aver_Intens_MultiWaveScoring_cyto	Cyto: Average Actin Pixel Intensity of cells with greater than 50µm2 staining	actin localization
Positive_ACTIN_Mean_Cyto_Aver_Intens_MultiWaveScoring_cyto	Cyto: Average Actin Pixel Intensity in cytoplasm of cells with greater than 50µm2 staining	actin localization
Positive_ACTIN_Mean_Nucl_Aver_Intens_MultiWaveScoring_cyto	Cyto: Average Actin Pixel Intensity in nuclei of cells with greater than 50µm2 staining	actin localization
Positive_ACTIN_Mean_Nucl_Integr_Intens_MultiWaveScoring_cyto	Cyto: Total Actin Pixel Intensity in nuclei of cells with greater than 50µm2 staining	actin localization
Positive_ACTIN_Mean_Stain_Area_MultiWaveScoring_cyto	Cyto: Average Area of Actin of cells with greater than 50µm2 staining	actin localization
Positive_ACTIN_MultiWaveScoring_cyto	Cyto: Count of cells with greater than 50µm2 Actin staining	actin localization
Binucleated_Cells_Micronuclei_EdU	Nucl: Count of Binucleated Cells	binucleated cells
Binucleated_Cells_Micronuclei_cyto	Cyto: Count of Binucleated Cells	binucleated cells
DNA_Total_Area_Micronuclei_cyto	Cyto: Total Area of DNA	binucleated cells
DualMono_cell_ratio_Micronuclei_EdU	Nucl: Ratio of Binucleate to Mononucleate cells	binucleated cells
DualMono_cell_ratio_Micronuclei_cyto	Cyto: Ratio of Binucleate to Mononucleate cells	binucleated cells
Micro_and_Binucleated_Cells_Micronuclei_EdU	Nucl: Count of Binucleate Cells with Micronuclei	binucleated cells
Mononucleated_Cells_Micronuclei_EdU	Nucl: Count of cells with One Nucleus	binucleated cells
Mononucleated_Cells_Micronuclei_cyto	Cyto: Count of cells with One Nucleus	binucleated cells
MultiDualMono_cell_ratio_Micronuclei_EdU	Nucl: Ratio Multinucleate and Binucleate Cells to Mononucleate Cells	binucleated cells
MultiDualMono_cell_ratio_Micronuclei_cyto	Cyto: Ratio Multinucleate and Binucleate Cells to Mononucleate Cells	binucleated cells
MultiMono_cell_ratio_Micronuclei_EdU	Nucl: Ratio of Multinucleate to Mononucleate Cells	binucleated cells
MultiMono_cell_ratio_Micronuclei_cyto	Cyto: Ratio of Multinucleate to Mononucleate Cells	binucleated cells
Multinucleated_Cells_Micronuclei_EdU	Nucl: Count of Multinucleated Cells	binucleated cells
Multinucleated_Cells_Micronuclei_cyto	Cyto: Count of Multinucleated Cells	binucleated cells
Nuclear_Division_Index_Micronuclei_EdU	(Mononuclei+(2*Binuclei)+(3*Multinuclei))/(Total Number of Cells)	binucleated cells
Pct_Binucleated_Cells_Micronuclei_EdU	Nucl: Percent Binucleated Cells	binucleated cells
Pct_Binucleated_Cells_Micronuclei_cyto	Cyto: Percent Binucleated Cells	binucleated cells
Pct_Multinucleated_Cells_Micronuclei_EdU	Nucl: Percent Multinucleated Cells	binucleated cells
All_Cells_Mean_Area_MultiWaveScoring_EdU	Nucl: Average Cell Area	cell area/shape
Breadth_IMA_Summary_cyto	Cyto: Average Breadth of Hoechst Stained Cells	cell area/shape
Cell_Total_Area_MultiWaveScoring_EdU	Nucl: Total Area of a cell	cell area/shape
Equiv_oblate_vol_IMA_Summary_EdU	Nucl: Volume of Spheroid Created by Rotating around the Shorter Width of the object	cell area/shape
Equiv_oblate_vol_IMA_Summary_cyto	Nucl: Volume of Spheroid Created by Rotating around the Shorter Width of the object	cell area/shape
Equiv_prolate_vol_IMA_Summary_EdU	Nucl: Volume of Spheroid Created by Rotating around the Longer Width of the object	cell area/shape
Equiv_prolate_vol_IMA_Summary_cyto	Nucl: Volume of Spheroid Created by Rotating around the Longer Width of the object	cell area/shape
Outer_radius_IMA_Summary_EdU	Nucl: Distance From Centroid to Farthest Point on Object Edge	cell area/shape
Outer_radius_IMA_Summary_cyto	Cyto: Distance From Centroid to Farthest Point on Object Edge	cell area/shape
Shape_factor_IMA_Summary_cyto	Cyto: How Closely an Object resembles a circle	cell area/shape
Nuclear_Count_Transfluor_EdU	Nucl: Total Cells in a Well	cell count
Total_Cells_Micronuclei_EdU	Nucl: Total Cells in a Well	cell count
Total_Cells_Micronuclei_cyto	Cyto: Total Cells in a Well	cell count
Total_Cells_MultiWaveScoring_EdU	Nucl: Total Cells in a Well	cell count
Total_Cells_MultiWaveScoring_cyto	Cyto: Total Cells in a Well	cell count
Pct_ProbeAB_Positive_Cells_Micronuclei_EdU	Nucl: Percent Cells labeled with both EdU and PH3	EdU and pH3 combined
All_EdU_Mean_Nucl_Integr_Intens_MultiWaveScoring_EdU	Nucl: Average Total Intensity of EdU in nuclei	EdU area
All_EdU_Mean_Stain_Area_MultiWaveScoring_EdU	Nucl: Average Area of EdU Stain	EdU area
Area_IMA_Summary_EdU	Nucl: Total Area of EdU Stain	EdU area
Breadth_IMA_Summary_EdU	Nucl: Average Breadth of EdU Stained Cells	EdU area
Negative_EdU_Mean_Stain_Area_MultiWaveScoring_EdU	Nucl: Average Area of EdU in cells with less than 75µm2 staining	EdU area
Pct_Positive_EdU_MultiWaveScoring_EdU	Nucl: Percent EdU Stained Cells	EdU area
Pct_ProbeA_Positive_Cells_Micronuclei_EdU	Nucl: Percent EdU Labeled Cells	EdU area
Positive_EdU_Mean_Cell_Aver_Intens_MultiWaveScoring_EdU	Nucl: Average EdU Pixel Intensity of cells with greater than 75µm2 staining	EdU area
Positive_EdU_Mean_Stain_Area_MultiWaveScoring_EdU	Nucl: Average Area of EdU of cells with greater than 75µm2 staining	EdU area
Positive_EdU_Mean_Stain_Aver_Intens_MultiWaveScoring_EdU	Nucl: Average Pixel Intesnity of EdU with greater than 75µm2 staining	EdU area
Total_area_IMA_Summary_EdU	Nucl: Average Total Area of Nuclei	EdU area
Cell_EdU_Stained_Area_MultiWaveScoring_EdU	Nucl: Area of EdU Stain per cell	Edu area/shape
Width_IMA_Summary_EdU	Nucl: Average Width of EdU Stained Cells	Edu area/shape
Pit_Area_Per_Cell_Transfluor_cyto	Cyto: Area of bright foci in Tubulin Channel between 1-4 nm per cell	EdU foci
Pit_Average_Intensity_Transfluor_EdU	Nucl: Average Intensity of bright foci in EdU Channel between 1-4 nm	EdU foci
Pit_Count_Transfluor_EdU	Nucl: Count of bright foci in EdU Channel between 1-4 nm	EdU foci
Pit_Integrated_Intensity_Transfluor_EdU	Nucl: Total Intensity of bright foci in EdU Channel between 1-4 nm	EdU foci
All_EdU_Mean_Cell_Aver_Intens_MultiWaveScoring_EdU	Nucl: Average Intensity of EdU for a Cell	EdU intensity
All_EdU_Mean_Cell_Integr_Intens_MultiWaveScoring_EdU	Nucl: Average Total Intensity of EdU	EdU intensity
All_EdU_Mean_Nucl_Aver_Intens_MultiWaveScoring_EdU	Nucl: Average Pixel Intensity of EdU in nuclei	EdU intensity
All_EdU_Mean_Stain_Aver_Intens_MultiWaveScoring_EdU	Nucl: Average Pixel Intensity of EdU stain	EdU intensity
All_EdU_Mean_Stain_Integr_Intens_MultiWaveScoring_EdU	Nucl: Average Total Intensity of EdU stain	EdU intensity
Average_intensity_IMA_Summary_EdU	Nucl: Average Intensity of EdU stain	EdU intensity
Cell_DNA_Average_Intensity_Micronuclei_EdU	Nucl: Average Pixel Intensity of Hoechst Stain per cell	EdU intensity
Cell_EdU_Cell_Average_Intensity_MultiWaveScoring_EdU	Nucl: Average Pixel Intensity of EdU Stain per cell	EdU intensity
Cell_EdU_Stained_Average_Intensity_MultiWaveScoring_EdU	Nucl: Average Pixel Intensity of Edu Stain per Cell	EdU intensity
Cell_ProbeA_Average_Intensity_Micronuclei_EdU	Nucl: Average intensity of EdU stain	EdU intensity
Negative_EdU_Mean_Cell_Integr_Intens_MultiWaveScoring_EdU	Nucl: Total EdU Pixel Intensity in cells with less than 75µm2 staining	EdU intensity
Negative_EdU_Mean_Nucl_Integr_Intens_MultiWaveScoring_EdU	Nucl: Total EdU Pixel Intensity in nuclei of nuclei with less than 75µm2 staining	EdU intensity
Negative_EdU_Mean_Stain_Aver_Intens_MultiWaveScoring_EdU	Nucl: Average Pixel Intesnity of EdU in cells with less than 75µm2 staining	EdU intensity
Negative_EdU_Mean_Stain_Integr_Intens_MultiWaveScoring_EdU	Nucl: Total Pixel Intensity of EdU with less than 75µm2 staining	EdU intensity
Negative_PH3_Mean_Stain_Integr_Intens_MultiWaveScoring_EdU	Nucl: Total Pixel Intensity of PH3 with less than 50µm2 staining	EdU intensity
Negative_PH3_Mean_Stain_Integr_Intens_MultiWaveScoring_cyto	Cyto: Total Pixel Intensity of PH3 with less than 50µm2 staining	EdU intensity
Positive_EdU_Mean_Cell_Integr_Intens_MultiWaveScoring_EdU	Nucl: Total EdU Pixel Intensity of cells with greater than 75µm2 staining	EdU intensity
Positive_EdU_Mean_Nucl_Aver_Intens_MultiWaveScoring_EdU	Nucl: Average EdU Pixel Intensity of nuclei with greater than 75µm2 staining	EdU intensity
Positive_EdU_Mean_Nucl_Integr_Intens_MultiWaveScoring_EdU	Nucl: Total EdU Pixel Intensity of nuclei with greater than 75µm2 staining	EdU intensity
Positive_EdU_Mean_Stain_Integr_Intens_MultiWaveScoring_EdU	Nucl: Total Pixel Intensity of EdU with greater than 75µm2 staining	EdU intensity
Positive_EdU_MultiWaveScoring_EdU	Nucl: Count of cells with greater than 75µm2 EdU staining	EdU intensity
Cell_Gradient_Index_Transfluor_cyto	Cyto: Difference Between the Max and Min Intensity within a Local Neighborhood	fluctuation/gradient measurements
Cell_Laplacian_Index_Transfluor_cyto	Cyto: Measures Fluctuations in the Gradient	fluctuation/gradient measurements
Cell_Texture_Index_Transfluor_cyto	Cyto: Standard Deviation of Intensity Values in a cell	fluctuation/gradient measurements
Cellular_Gradient_Index_Transfluor_EdU	Nucl: Difference Between the Max and Min Intensity within a Local Neighborhood near the nucleus	fluctuation/gradient measurements
Cellular_Gradient_Index_Transfluor_cyto	Cyto: Difference Between the Max and Min Intensity within a Local Neighborhood near the nucleus	fluctuation/gradient measurements
Cellular_Laplacian_Index_Transfluor_EdU	Nucl: Measures Fluctuations in the Gradient near the nucleus	fluctuation/gradient measurements
Cellular_Texture_Index_Transfluor_EdU	Nucl: Standard Deviation of Intensity Values in Image near the nuclei	fluctuation/gradient measurements
Gradient_Index_Transfluor_EdU	Nucl: Average Difference Between the Max and Min Intensity within a Local Neighborhood	fluctuation/gradient measurements
Gradient_Index_Transfluor_cyto	Cyto: Average Difference Between the Max and Min Intensity within a Local Neighborhood	fluctuation/gradient measurements
Laplacian_Index_Transfluor_EdU	Nucl: Average Fluctuation in the Gradient	fluctuation/gradient measurements
Laplacian_Index_Transfluor_cyto	Cyto: Average Fluctuation in the Gradient	fluctuation/gradient measurements
Texture_Index_Transfluor_EdU	Nucl: Standard Deviation of Intensity Values in Image	fluctuation/gradient measurements
Texture_Index_Transfluor_cyto	Cyto: Standard Deviation of Intensity Values in Image	fluctuation/gradient measurements
Interphase_Cells_Micronuclei_EdU	Nucl: Count of Cells in Interphase	interphase count
Interphase_Cells_Micronuclei_cyto	Cyto: Count of Cells in Interphase	interphase count
Cells_with_multi_micronuclei_Micronuclei_EdU	Nucl: Number of cells with multiple micronuclei	micronuclei
Cells_with_multi_micronuclei_Micronuclei_cyto	Cyto: Number of cells with multiple micronuclei	micronuclei
Cells_with_one_micronucleus_Micronuclei_EdU	Nucl: Number of Cells with one micronucleus	micronuclei
Micro_and_ProbeABpositive_Cells_Micronuclei_EdU	Nucl: Count of Cells Scored Positive for both EdU and PH3 with Micronuclei	micronuclei
Micro_and_ProbeApositive_Cells_Micronuclei_EdU	Nucl: Count of Cells Scored Positive for EdU with Micronuclei	micronuclei
Micro_and_ProbeBpositive_Cells_Micronuclei_EdU	Nucl: Count of Cells Scored Positive for PH3 with Micronuclei	micronuclei
Micronucleated_Cells_Micronuclei_EdU	Nucl: Count of Cells with Micronuclei	micronuclei
Micronuclei_per_Cell_Micronuclei_EdU	Nucl: Average Count of Micronuclei per cell	micronuclei
Micronuclei_per_Cell_Micronuclei_cyto	Cyto: Average Count of Micronuclei per cell	micronuclei
Micronuclei_per_Healthy_Cell_Micronuclei_EdU	Nucl: Count of Micronuclei per Healthy Cell	micronuclei
Micronuclei_per_Mononucleated_Cell_Micronuclei_EdU	Nucl: Average Count of Micronuclei per Mononucleated Cell	micronuclei
Micronuclei_per_Mononucleated_Cell_Micronuclei_cyto	Cyto: Average Count of Micronuclei per Mononucleated Cell	micronuclei
Micronuclei_per_ProbeABpositive_Cell_Micronuclei_EdU	Nucl: Average Count of Micronuclei per cells stained positively for EdU and PH3	micronuclei
Micronuclei_per_ProbeApositive_Cell_Micronuclei_EdU	Nucl: Average Count of Micronuclei per cells stained positively for EdU	micronuclei
Micronuclei_per_ProbeBpositive_Cell_Micronuclei_EdU	Nucl: Average Count of Micronuclei per cells stained positively for PH3	micronuclei
Pct_Cells_with_multi_micronuclei_Micronuclei_EdU	Nucl: Percentage of Cells with Multiple Micronuclei	micronuclei
Pct_Cells_with_multi_micronuclei_Micronuclei_cyto	Cyto: Percentage of Cells with Multiple Micronuclei	micronuclei
Pct_Cells_with_one_micronucleus_Micronuclei_EdU	Nucl: Percentage of Cells with One Micronuclei	micronuclei
Pct_Cells_with_one_micronucleus_Micronuclei_cyto	Cyto: Percentage of Cells with One Micronuclei	micronuclei
Pct_Micronucleated_Cells_Micronuclei_EdU	Nucl: Percent Micronucleated Cells	micronuclei
Pct_Micronucleated_Cells_Micronuclei_cyto	Cyto: Percent Micronucleated Cells	micronuclei
Total_Micronuclei_Micronuclei_cyto	Cyto: Total Number of Micronuclei in a well	micronuclei
Mitotic_Cells_Micronuclei_EdU	Nucl: Count of Mitotic Cells	mitotic index
Mitotic_Cells_Micronuclei_cyto	Cyto: Count of Mitotic Cells	mitotic index
Pct_Mitotic_Cells_Micronuclei_EdU	Nucl: Percent Mitotic Cells	mitotic index
Pct_Positive_PH3_MultiWaveScoring_EdU	Nucl: Percent Mitotic Cells	mitotic index
Pct_Positive_PH3_MultiWaveScoring_cyto	Cyto: Percent Mitotic Cells	mitotic index
All_Nuclei_Mean_Area_MultiWaveScoring_EdU	Nucl: Average Area of Nuclei	nuclear area/shape
All_Nuclei_Mean_Area_MultiWaveScoring_cyto	Cyto: Average Area of Nuclei	nuclear area/shape
All_Nuclei_Mean_Average_Itensity_MultiWaveScoring_EdU	Nucl: Average Pixel Intensity of Hoechst Stained nuclei	nuclear area/shape
All_Nuclei_Mean_Average_Itensity_MultiWaveScoring_cyto	Cyto: Average Pixel Intensity of Hoechst Stained nuclei	nuclear area/shape
All_Nuclei_Mean_Integr_Itensity_MultiWaveScoring_EdU	Nucl: Average Total Intensity of Hoechst Stained nuclei	nuclear area/shape
All_Nuclei_Mean_Integr_Itensity_MultiWaveScoring_cyto	Cyto: Average Total Intensity of Hoechst Stained nuclei	nuclear area/shape
Area_IMA_Summary_cyto	Cyto: Total Area of Hoechst Stain	nuclear area/shape
Average_intensity_IMA_Summary_cyto	Cyto: Average Intensity of Hoechst Stain	nuclear area/shape
DAPI_Stained_Area_MultiWaveScoring_EdU	Nucl: Area of Hoechst Stain	nuclear area/shape
DNA_Mean_Area_Micronuclei_EdU	Nucl: Average Area of DNA	nuclear area/shape
DNA_Mean_Area_Micronuclei_cyto	Cyto: Average Area of DNA	nuclear area/shape
DNA_Total_Area_Micronuclei_EdU	Nucl: Total Area of DNA	nuclear area/shape
Ell_form_factor_IMA_Summary_EdU	Nucl: Length Divided By Breadth of Nuclei	nuclear area/shape
Ell_form_factor_IMA_Summary_cyto	Cyto: Length Divided By Breadth of Nuclei	nuclear area/shape
Equiv_radius_IMA_Summary_EdU	Nucl: Radius of a Circle that contains the Area of the Nucleus	nuclear area/shape
Equiv_radius_IMA_Summary_cyto	Cyto: Radius of a Circle that contains the Area of the Nucleus	nuclear area/shape
Equiv_sphere_surface_area_IMA_Summary_EdU	Nucl: Surface Area of Sphere with Equivalent Radius of the Nucleus	nuclear area/shape
Equiv_sphere_surface_area_IMA_Summary_cyto	Cyto: Surface Area of Sphere with Equivalent Radius of the Nucleus	nuclear area/shape
Equiv_sphere_vol_IMA_Summary_EdU	Nucl: Volume of Sphere with the Equivalent Radius of the Nucleus	nuclear area/shape
Equiv_sphere_vol_IMA_Summary_cyto	Cyto: Volume of Sphere with the Equivalent Radius of the Nucleus	nuclear area/shape
Inner_radius_IMA_Summary_EdU	Nucl: Distance From Centroid to Nearest Point on Nuclei Edge	nuclear area/shape
Inner_radius_IMA_Summary_cyto	Cyto: Distance From Centroid to Nearest Point on Nuclei Edge	nuclear area/shape
Length_IMA_Summary_EdU	Nucl: Longest Chord Through the Nucleus	nuclear area/shape
Length_IMA_Summary_cyto	Cyto: Longest Chord Through the Nucleus	nuclear area/shape
Mean_radius_IMA_Summary_EdU	Nucl: Average Distance from the Centroid to Nucleus Edge	nuclear area/shape
Mean_radius_IMA_Summary_cyto	Cyto: Average Distance from the Centroid to Nucleus Edge	nuclear area/shape
Nuclear_Area_Per_Cell_Transfluor_EdU	Nucl: Average Area of Nuclei	nuclear area/shape
Nuclear_Total_Area_Transfluor_EdU	Nucl: Total Area of Nuclei	nuclear area/shape
Pct_ProbeB_Positive_Cells_Micronuclei_EdU	Nucl: Percent PH3 Labeled Cells	nuclear area/shape
Perimeter_IMA_Summary_EdU	Nucl: Length of Perimeter of Nuclei	nuclear area/shape
Pixel_area_IMA_Summary_cyto	Cyto: Number of Pixels in the Nuclei	nuclear area/shape
Total_area_IMA_Summary_cyto	Cyto: Average Total Area of Nuclei	nuclear area/shape
Cell_DNA_Average_Intensity_Micronuclei_cyto	Cyto: Average Pixel Intensity of Hoechst Stain per cell	nuclear intensity
Cell_EdU_Nucleus_Average_Intensity_MultiWaveScoring_EdU	Nucl: Average Pixel Intensity of Nuclear EdU Stain per cell	EdU intensity
Cell_Nuclear_Average_Intensity_Micronuclei_EdU	Nucl: Average Intensity of Nuclei	nuclear intensity
Cell_Nuclear_Average_Intensity_Micronuclei_cyto	Cyto: Average Intensity of Nuclei	nuclear intensity
Cell_Nuclear_Average_Intensity_Transfluor_EdU	Nucl: Average Intensity of Nuclei	nuclear intensity
Cell_Nuclear_Average_Intensity_Transfluor_cyto	Cyto: Average Intensity of Nuclei	nuclear intensity
DAPI_Average_Intensity_MultiWaveScoring_EdU	Nucl: Average Intensity of Hoechst Stain	nuclear intensity
DAPI_Average_Intensity_MultiWaveScoring_cyto	Cyto: Average Intensity of Hoechst Stain	nuclear intensity
Nuclear_Average_Intensity_Transfluor_EdU	Nucl: Average Intensity of Hoechst Stain	nuclear intensity
Nuclear_Integrated_Intensity_Transfluor_EdU	Nucl: Total Pixel Intesity of Nuclei	nuclear intensity
Pixel_area_IMA_Summary_EdU	Nucl: Number of Pixels in the Nuclei	nuclear intensity
Total_intensity_IMA_Summary_EdU	Nucl: Total Pixel Intensity of Nuclei	nuclear intensity
Total_intensity_IMA_Summary_cyto	Cyto: Total Pixel Intensity of Nuclei	nuclear intensity
All_PH3_Mean_Stain_Area_MultiWaveScoring_EdU	Nucl: Average Area of PH3 stain	pH3 area
All_PH3_Mean_Stain_Area_MultiWaveScoring_cyto	Cyto: Average Area of PH3 stain	pH3 area
Negative_PH3_Mean_Stain_Area_MultiWaveScoring_EdU	Nucl: Average Area of PH3 in cells with less than 50µm2 staining	pH3 area
Negative_PH3_Mean_Stain_Area_MultiWaveScoring_cyto	Cyto: Average Area of PH3 in cells with less than 50µm2 staining	pH3 area
All_PH3_Mean_Cell_Aver_Intens_MultiWaveScoring_EdU	Nucl: Average Pixel Intensity of PH3 Staining	pH3 intensity
All_PH3_Mean_Cell_Integr_Intens_MultiWaveScoring_EdU	Nucl: Average Total Intensity of PH3 Staining	pH3 intensity
All_PH3_Mean_Nucl_Aver_Intens_MultiWaveScoring_EdU	Nucl: Average Pixel Intensity of PH3 in nuclei	pH3 intensity
All_PH3_Mean_Nucl_Integr_Intens_MultiWaveScoring_EdU	Nucl: Average Total Intensity of PH3 in nuclei	pH3 intensity
All_PH3_Mean_Nucl_Integr_Intens_MultiWaveScoring_cyto	Cyto: Average Pixel Intensity of PH3 in nuclei	pH3 intensity
All_PH3_Mean_Stain_Aver_Intens_MultiWaveScoring_EdU	Nucl: Average Pixel Intensity of PH3 Stain	pH3 intensity
All_PH3_Mean_Stain_Aver_Intens_MultiWaveScoring_cyto	Cyto: Average Pixel Intensity of PH3 Stain	pH3 intensity
All_PH3_Mean_Stain_Integr_Intens_MultiWaveScoring_EdU	Nucl: Average Total Intensity of PH3 Staining	pH3 intensity
All_PH3_Mean_Stain_Integr_Intens_MultiWaveScoring_cyto	Cyto: Average Total Intensity of Ph3 Staining	pH3 intensity
Cell_PH3_Stained_Average_Intensity_MultiWaveScoring_EdU	Nucl: Average Pixel Intensity of PH3 Stain per cell	pH3 intensity
Cell_PH3_Stained_Average_Intensity_MultiWaveScoring_cyto	Cyto: Average Pixel Intensity of PH3 Stain per cell	pH3 intensity
Negative_PH3_Mean_Cell_Integr_Intens_MultiWaveScoring_EdU	Nucl: Total PH3 Pixel Intensity in cells with less than 50µm2 staining	pH3 intensity
Negative_PH3_Mean_Nucl_Integr_Intens_MultiWaveScoring_EdU	Nucl: Total PH3 Pixel Intensity in nuclei of nuclei with less than 50µm2 staining	pH3 intensity
Negative_PH3_Mean_Stain_Aver_Intens_MultiWaveScoring_EdU	Nucl: Average Pixel Intesnity of PH3 in cells with less than 50µm2 staining	pH3 intensity
Negative_PH3_Mean_Stain_Aver_Intens_MultiWaveScoring_cyto	Cyto: Average Pixel Intesnity of PH3 in cells with less than 50µm2 staining	pH3 intensity
Positive_PH3_Mean_Cell_Aver_Intens_MultiWaveScoring_EdU	Nucl: Average Pixel Intesnity of PH3 in cells with greater than 50µm2 staining	pH3 intensity large areas
Positive_PH3_Mean_Cell_Aver_Intens_MultiWaveScoring_cyto	Cyto: Average Pixel Intesnity of PH3 in cells with greater than 50µm2 staining	pH3 intensity large areas
Positive_PH3_Mean_Cell_Integr_Intens_MultiWaveScoring_EdU	Nucl: Total Pixel Intesnity of PH3 in cells with greater than 50µm2 staining	pH3 intensity large areas
Positive_PH3_Mean_Cyto_Aver_Intens_MultiWaveScoring_cyto	Cyto: Average Pixel Intesnity of PH3 in cytoplasm of cells with greater than 50µm2 staining	pH3 intensity large areas
Positive_PH3_Mean_Nucl_Aver_Intens_MultiWaveScoring_EdU	Nucl: Average Pixel Intesnity of PH3 in nuclei of cells with greater than 50µm2 staining	pH3 intensity large areas
Positive_PH3_Mean_Nucl_Aver_Intens_MultiWaveScoring_cyto	Cyto: Average Pixel Intesnity of PH3 in nuclei of cells with greater than 50µm2 staining	pH3 intensity large areas
Positive_PH3_Mean_Nucl_Integr_Intens_MultiWaveScoring_EdU	Nucl: Total Pixel Intesnity of PH3 in nuclei of cells with greater than 50µm2 staining	pH3 intensity large areas
Positive_PH3_Mean_Nucl_Integr_Intens_MultiWaveScoring_cyto	Cyto: Total Pixel Intesnity of PH3 in nuclei of cells with greater than 50µm2 staining	pH3 intensity large areas
Positive_PH3_Mean_Stain_Area_MultiWaveScoring_EdU	Nucl: Average Area of PH3 in cells with greater than 50µm2 staining	pH3 intensity large areas
Positive_PH3_Mean_Stain_Area_MultiWaveScoring_cyto	Cyto: Average Area of PH3 in cells with greater than 50µm2 staining	pH3 intensity large areas
Positive_PH3_Mean_Stain_Aver_Intens_MultiWaveScoring_EdU	Nucl: Average Pixel Intesnity of PH3 in cells with greater than 50µm2 staining	pH3 intensity large areas
Positive_PH3_Mean_Stain_Aver_Intens_MultiWaveScoring_cyto	Cyto: Average Pixel Intesnity of PH3 in cells with greater than 50µm2 staining	pH3 intensity large areas
Positive_PH3_Mean_Stain_Integr_Intens_MultiWaveScoring_EdU	Nucl: Total Pixel Intensity of PH3 with greater than 50µm2 staining	pH3 intensity large areas
Positive_PH3_Mean_Stain_Integr_Intens_MultiWaveScoring_cyto	Cyto: Total Pixel Intensity of PH3 with greater than 50µm2 staining	pH3 intensity large areas
Positive_PH3_MultiWaveScoring_EdU	Nucl: Count of cells with greater than 50µm2 PH3 staining	pH3 intensity large areas
Positive_PH3_MultiWaveScoring_cyto	Cyto: Count of cells with greater than 50µm2 PH3 staining	pH3 intensity large areas
Cell_Pit_Average_Intensity_Transfluor_cyto	Cyto: Average Intensity of bright foci in Tubulin Channel between 1-4 nm in a cell	tubulin foci, 1-4 nm
Perimeter_IMA_Summary_cyto	Cyto: Length of Perimeter of Nuclei	tubulin foci, 1-4 nm
Pit_Average_Intensity_Transfluor_cyto	Cyto: Average Intensity of bright foci in Tubulin Channel between 1-4 nm	tubulin foci, 1-4 nm
Pit_Count_Per_Cell_Transfluor_cyto	Cyto: Count of bright foci in Tubulin Channel between 1-4 nm per cell	tubulin foci, 1-4 nm
Pit_Count_Transfluor_cyto	Cyto: Count of bright foci in Tubulin Channel between 1-4 nm	tubulin foci, 1-4 nm
Pit_Integrated_Intensity_Transfluor_cyto	Cyto: Total Intensity of bright foci in Tubulin Channel between 1-4 nm	tubulin foci, 1-4 nm
Pit_Total_Area_Transfluor_EdU	Nucl: Total Area of bright foci in Tubulin Channel between 1-4 nm	tubulin foci, 1-4 nm
Pit_Total_Area_Transfluor_cyto	Cyto: Total Area of bright foci in Tubulin Channel between 1-4 nm per cell	tubulin foci, 1-4 nm
All_TUBULIN_Mean_Cell_Aver_Intens_MultiWaveScoring_cyto	Cyto: Average Pixel Intensity of Tubulin Stain	tubulin intensity
All_TUBULIN_Mean_Cyto_Aver_Intens_MultiWaveScoring_cyto	Cyto: Average Pixel Intensity of Tubulin Staining in cytoplasm	tubulin intensity
All_TUBULIN_Mean_Stain_Aver_Intens_MultiWaveScoring_cyto	Cyto: Average Pixel Intensity of Tubulin Stain	tubulin intensity
Cell_TUBULIN_Cell_Average_Intensity_MultiWaveScoring_cyto	Cyto: Average Intensity of Tubulin per cell	tubulin intensity
Cell_TUBULIN_Nucleus_Integr_Intensity_MultiWaveScoring_cyto	Cyto: Total Intensity of Nuclear Tubulin per cell	tubulin intensity
Negative_TUBULIN_Mean_Cell_Aver_Intens_MultiWaveScoring_cyto	Cyto: Average Tubulin Pixel Intensity of cells with less than 25µm2 staining	tubulin intensity
Negative_TUBULIN_Mean_Cell_Integr_Intens_MultiWaveScoring_cyto	Cyto: Total Tubulin Pixel Intensity of cells with less than 25µm2 staining	tubulin intensity
Negative_TUBULIN_Mean_Cyto_Aver_Intens_MultiWaveScoring_cyto	Cyto: Average Tubulin Intensity in cytoplasm of cells with less than 25µm2 staining	tubulin intensity
Negative_TUBULIN_Mean_Nucl_Aver_Intens_MultiWaveScoring_cyto	Cyto: Average Tubulin Intensity in nuclei of cells with less than 25µm2 staining	tubulin intensity
Negative_TUBULIN_Mean_Nucl_Integr_Intens_MultiWaveScoring_cyto	Cyto: Total Tubulin Intensity in nuclei of cells with less than 25µm2 staining	tubulin intensity
Negative_TUBULIN_Mean_Stain_Aver_Intens_MultiWaveScoring_cyto	Cyto: Average Tubulin Pixel Intensity with less than 25µm2 staining	tubulin intensity
Negative_TUBULIN_Mean_Stain_Integr_Intens_MultiWaveScoring_cyto	Cyto: Total Tubulin Intensity with less than 25µm2 staining	tubulin intensity
Pct_Positive_TUBULIN_MultiWaveScoring_cyto	Cyto: Percent Tubulin Stained Cells	tubulin intensity
Positive_TUBULIN_Mean_Cell_Aver_Intens_MultiWaveScoring_cyto	Cyto: Average Tubulin Pixel Intensity of cells with greater than 25µm2 staining	tubulin intensity large areas
Positive_TUBULIN_Mean_Cyto_Aver_Intens_MultiWaveScoring_cyto	Cyto: Average Tubulin Pixel Intensity of cytoplasm in cells with greater than 25µm2 staining	tubulin intensity large areas
Positive_TUBULIN_Mean_Nucl_Aver_Intens_MultiWaveScoring_cyto	Cyto: Average Tubulin Pixel Intensity of nuclei in cells with greater than 25µm2 staining	tubulin intensity large areas
Positive_TUBULIN_Mean_Nucl_Integr_Intens_MultiWaveScoring_cyto	Cyto: Total Tubulin Intensity in nuclei of cells with greater than 25µm2 staining	tubulin intensity large areas
Positive_TUBULIN_Mean_Stain_Aver_Intens_MultiWaveScoring_cyto	Cyto: Average Tubulin Pixel Intensity with greater than 25µm2 staining	tubulin intensity large areas
Positive_TUBULIN_MultiWaveScoring_cyto	Cyto: Count of cells with greater than 25µm2 Tubulin staining	tubulin intensity large areas
All_TUBULIN_Mean_Nucl_Aver_Intens_MultiWaveScoring_cyto	Cyto: Average Pixel Intensity of Tubulin Staining in nucleus	tubulin localization
All_TUBULIN_Mean_Nucl_Integr_Intens_MultiWaveScoring_cyto	Cyto: Average Total Intensity of Tubulin Staining in nucleus	tubulin localization
Cell_TUBULIN_Nucleus_Average_Intensity_MultiWaveScoring_cyto	Cyto: Average Intensity of Nuclear Tubulin per cell	tubulin localization
Negative_TUBULIN_Mean_Stain_Area_MultiWaveScoring_cyto	Cyto: Average Area of Tubulin of cells with less than 25µm2 staining	tubulin localization

## Sheet: compounds and compound classes
compound	compound class
Huperzine A [(-)-Huperzine A]	acetylcholinesterase inhibitor
Cytochalasin B	actin poison
Cytochalasin D	actin poison
Latrunculin B	actin poison
Mastoparan	activates heterotrimeriuc GTPases
IB-MECA	adenosine receptor ligand
5'-N-Ethylcarboxamidoadenosine (NECA)	adenosine receptor ligand
Forskolin	adenylate cyclase activator
SQ22536	adenylate cyclase inhibitor
Aminobenzamide (3-ABA) [3-Aminobenzamide (3-ABA)]	ADP ribose polymerase inhibitor
Diindolylmethane	AHR ligand
Alrestatin	aldose reductase inhibitor
Cirazoline	alpha adrenergic agonist
Clonidine	alpha adrenergic agonist
Prazocin	alpha adrenergic agonist
Yohimbine	alpha adrenergic antagonist
U-74389G	antioxidant
Ebselen	antioxidant
CAPE	antioxidant
MnTBAP	antioxidant
MCI-186	antioxidant
Tanshinone IIA	AP-1 inhibitor
Brefeldin A	ARF GEF inhibitor
2-Methoxyantimycin A3	Bcl-2 ligand
HA14-1	Bcl-2 ligand
Cimaterol	beta adrenergic agonist
Propranolol (S-)	beta adrenergic agonist
11;12-Epoxyeicosatrienoic acid	bioactive lipid
12(R)-HETE	bioactive lipid
12(S)-HETE	bioactive lipid
12(S)-HPETE	bioactive lipid
12-Methoxydodecanoic acid	bioactive lipid
13(S)-HODE	bioactive lipid
13(S)-HPODE	bioactive lipid
13-Ketooctadecadienoic acid	bioactive lipid
14;15-Epoxyeicosatrienoic acid	bioactive lipid
15(S)-HETE	bioactive lipid
15(S)-HPETE	bioactive lipid
15-Ketoeicosatetraenoic acid	bioactive lipid
1-Acyl-PAF	bioactive lipid
1-Hexadecyl-2-arachidonoyl-glycerol	bioactive lipid
1-Hexadecyl-2-methylglycero-3 PC	bioactive lipid
1-Hexadecyl-2-O-acetyl-glycerol	bioactive lipid
1-Hexadecyl-2-O-methyl-glycerol	bioactive lipid
1-Octadecyl-2-methylglycero-3 PC	bioactive lipid
1-Oleoyl-2-acetyl-glycerol	bioactive lipid
1-Stearoyl-2-linoleoyl-glycerol	bioactive lipid
1-Stearoyl-2-arachidonoyl-glycerol	bioactive lipid
2-Fluoropalmitic acid	bioactive lipid
2-Hydroxymyristic acid	bioactive lipid
4-Oxatetradecanoic acid	bioactive lipid
5(S)-HETE	bioactive lipid
5(S)-HPETE	bioactive lipid
5;6-Epoxyeicosatrienoic acid	bioactive lipid
5;8;11;14-Eicosatetraynoic acid	bioactive lipid
5;8;11-Eicosatriynoic acid	bioactive lipid
5-Ketoeicosatetraenoic acid	bioactive lipid
6-Formylindolo [3;2-B] carbazole	bioactive lipid
6-Keto-prostaglandin F1?	bioactive lipid
7;7-Dimethyleicosadienoic acid	bioactive lipid
8;9-Epoxyeicosatrienoic acid	bioactive lipid
9(S)-HODE	bioactive lipid
9(S)-HPODE	bioactive lipid
Adrenic acid (22:4; n-6)	bioactive lipid
AGC	bioactive lipid
AGGC	bioactive lipid
Arachidonic acid (20:4; n-6)	bioactive lipid
Arachidonoyl-PAF	bioactive lipid
BML-190	bioactive lipid
C2 Ceramide	bioactive lipid
C2 Dihydroceramide	bioactive lipid
C8 Ceramide	bioactive lipid
C8 Dihydroceramide	bioactive lipid
Carbacyclin	bioactive lipid
C-PAF	bioactive lipid
Dihomo-gamma-linolenic acid	bioactive lipid
Dihydrosphingosine	bioactive lipid
Docosahexaenoic acid (22:6 n-3)	bioactive lipid
Docosapentaenoic acid	bioactive lipid
Docosatrienoic acid (22:3 n-3)	bioactive lipid
Eicosa-5;8-dienoic acid (20:2 n-12)	bioactive lipid
Eicosadienoic acid (20:2 n-6)	bioactive lipid
Eicosapentaenoic acid (20:5 n-3)	bioactive lipid
Eicosatrienoic acid (20:3 n-3)	bioactive lipid
Enantio-PAF C16	bioactive lipid
Farnesylthioacetic acid	bioactive lipid
Fluprostenol	bioactive lipid
?-Linolenic acid (18:3 n-6)	bioactive lipid
Leukotoxin A (9;10-EODE)	bioactive lipid
Leukotoxin B (12;13-EODE)	bioactive lipid
Leukotriene B4	bioactive lipid
Leukotriene C4	bioactive lipid
Leukotriene D4	bioactive lipid
Leukotriene E4	bioactive lipid
Linoleic acid	bioactive lipid
Linolenic acid (18:3 n-3)	bioactive lipid
Lipoxin A4	bioactive lipid
L-NASPA	bioactive lipid
LY-171883	bioactive lipid
Lyso-PAF C16	bioactive lipid
Lysophosphatidic acid	bioactive lipid
Mead acid (20:3 n-9)	bioactive lipid
N-Acetyl-leukotriene E4	bioactive lipid
Phosphatidic acid; dipalmitoyl	bioactive lipid
S-Farnesyl-L-cysteine methyl ester	bioactive lipid
Sphingosine	bioactive lipid
SQ-29548	bioactive lipid
U-46619	bioactive lipid
U-75302	bioactive lipid
PCA 4248	bioactive lipid
17-Octadecynoic acid	bioactive lipid
TRIM	bNOS/NOS inhibitor
Cypermethrin	calcineurin inhibitor
Tyrphostin-8	calcineurin inhibitor
Amiloride	Calcium channels
Amiodarone	Calcium channels
Bay K-8644	Calcium channels
Benzamil	Calcium channels
Bepridil	Calcium channels
Cyclopiazonic acid	Calcium channels
Dantrolene	Calcium channels
Dichlorobenzamil	Calcium channels
Diltiazem	Calcium channels
Flunarizine	Calcium channels
FPL-64176	Calcium channels
Gingerol	Calcium channels
L-cis-Diltiazem	Calcium channels
Loperamide	Calcium channels
Methoxy verapamil	Calcium channels
Nicardipine	Calcium channels
Nifedipine	Calcium channels
Niguldipine	Calcium channels
Nimodipine	Calcium channels
Nitrendipine	Calcium channels
Pimozide	Calcium channels
Ryanodine	Calcium channels
SKF-96365	Calcium channels
Tetrandrine	Calcium channels
Thapsigargin	Calcium channels
TMB-8	Calcium channels
YS035	Calcium channels
BAPTA-AM	Calcium ionophore
A-23187	Calcium ionophore
U-50488	Calcium ionophore
Verapamil	Calcium ionophore
Ionomycin	Calcium ionophore
E6 Berbamine	calmodulin inhibitor
W7	calmodulin inhibitor
Phenoxybenzamine	calmodulin inhibitor
(R)-Methanandamide	cannabinoid receptor ligand
AM-251	cannabinoid receptor ligand
WIN 55;212-2	cannabinoid receptor ligand
2-Arachidonoylglycerol	cannabinoid receptor ligand
9;10-Octadecenoamide	cannabinoid receptor ligand
Anandamide (18:2;n-6)	cannabinoid receptor ligand
Anandamide (20:3;n-6)	cannabinoid receptor ligand
Anandamide (20:4; n-6)	cannabinoid receptor ligand
Anandamide (22:4;n-6)	cannabinoid receptor ligand
Arachidonamide	cannabinoid receptor ligand
Linoleamide	cannabinoid receptor ligand
Mead ethanolamide	cannabinoid receptor ligand
N-Arachidonoylglycine	cannabinoid receptor ligand
N-Linoleoylglycine	cannabinoid receptor ligand
Palmitylethanolamide	cannabinoid receptor ligand
TPEN	cell permable heavy metal chelator
MAPP; D-erythro	Ceramidase inhibitor
C16 Ceramide	ceramide analog
C8 Ceramine	ceramide analog
CITCO	Const. androstane receptor (CAR) agonist
Nimesulide	cyclooxygenase inhibitor
Indomethacin	cyclooxygenase inhibitor
Piroxicam	cyclooxygenase inhibitor
NS-398	cyclooxygenase inhibitor
RHC-80267	DAG lipase inhibitor
Methotrexate	DHFR inhibitor
Hoechst 33342 (cell permeable) (BisBenzimide)	DNA binding
Propidium iodide	DNA binding
Clozapine	dopamine antagonist
6;7-ADTN HBr	dopamine antagonist
Trifluoperazine	dopamine antagonist
Monastrol	Eg5 inhibitor
2;5-Ditertbutylhydroquinone	ER Ca++ ATPase inhibitor
Tamoxifen	estrogen antagonist
Acetyl (N)-S-farnesyl-L-cysteine	farnesylation inhibitor
B581	farnesylation inhibitor
L-744;832	farnesylation inhibitor
Manumycin A	farnesylation inhibitor
Cerulenin	Fatty acid biosynthesis inhibitor
Oligomycin A	Fo ATP synthase inhibitor
Castanospermine	glucosidase inhibitor
DL-PDMP	Glucosylceramide synthase inhibitor
DL-PPMP	Glucosylceramide synthase inhibitor
Deoxymannojirimycin(1)	glycoside hydrolase inhibitor
Deoxynorjrimycin(1)	glycoside hydrolase inhibitor
Decoyinine	GMP synthetase inhibitor
LY-83583	guanylate cyclase inhibitor
Cyclopamine	Hedgehog pathway inhibitor
YC-1	Hif-1 inhibitor
Histamine	histamine receptor ligand
Trichostatin-A	histone deacetylase inhibitor
17-Allylamino-geldanamycin	HSP-90 inhibitor
Geldanamycin	HSP-90 inhibitor
Parthenolide	IkappaB kinase inhibitor
Nigericin	induces intracellular acidification
Betulinic acid	induces mitochondrial permeability pore opening
Mevinolin (Lovastatin)	Inhibitor HMG-CoA reductase
CGP-37157	inhibitor of mitochondrial Na+Ca+2 exchange
Bongkrekic acid	inhibits ATP synthesis
Fumonisin B1	inhibits ceramide synthase
Mitomycin C	Inhibits DNA synthesis
Aphidicolin	Inhibits DNA synthesis
Mycophenolic acid	Inhibits DNA synthesis
10-Hydroxycamptothecin	Inhibits DNA synthesis
?-Lapachone	Inhibits DNA synthesis
Camptothecin	Inhibits DNA synthesis
Doxorubicin	Inhibits DNA synthesis
Etoposide	Inhibits DNA synthesis
ICRF-193	Inhibits DNA synthesis
Ikarugamyin	inhibits endocytosis
Deprenyl	inhibits glyceraldehyde-3-phosphate dehydrogenase
Decylubiquinone	inhibits mitochondrial permeability pore opening
Anisomycin	Inhibits protein synthesis
Cycloheximide	Inhibits protein synthesis
Puromycin	Inhibits protein synthesis
Lycorine	Inhibits protein synthesis
Actinomycin D	Inhibits transcription
Triptolide	Inhibits transcription
Thalidomide	inhibits ubiquitin ligase activity
Cyclo [Arg-Gly-Asp-D-Phe-Val]	integrin inhibitor
Alamethicin	ionophore
Xestospongin C	IP3 receptor blocker
Hinokitiol	iron chelator
Valinomycin	K+ ionophore
ML9	kinase
LY-294002	kinase
Bay 11-7082	kinase inhibitor
A-3	kinase inhibitor
AG1478	kinase inhibitor
AG213 (Tyrphostin 47)	kinase inhibitor
AG-370	kinase inhibitor
AG-490	kinase inhibitor
AG-879	kinase inhibitor
AG-1296	kinase inhibitor
SB-415286	kinase inhibitor
Calphostin C	kinase inhibitor
Chelerythrine	kinase inhibitor
Damnacanthal	kinase inhibitor
DRB	kinase inhibitor
Genistein	kinase inhibitor
Ro 31-8220	kinase inhibitor
Go6976	kinase inhibitor
H7	kinase inhibitor
H-89	kinase inhibitor
H9	kinase inhibitor
HA1077	kinase inhibitor
HA-1004	kinase inhibitor
HBDDE	kinase inhibitor
HNMPA-(AM)3	kinase inhibitor
K252A	kinase inhibitor
KN-62	kinase inhibitor
KT-5720	kinase inhibitor
Lavendustin A	kinase inhibitor
N9-Isopropylolomoucine	kinase inhibitor
5-Iodotubercidin	kinase inhibitor
LFM-A13	kinase inhibitor
ML7	kinase inhibitor
GW-5074	kinase inhibitor
Olomoucine	kinase inhibitor
PD 98059	kinase inhibitor
SU-4312	kinase inhibitor
PP1	kinase inhibitor
SB-431542	kinase inhibitor
SP-600125	kinase inhibitor
Quercetin	kinase inhibitor
Roscovitine	kinase inhibitor
Rottlerin	kinase inhibitor
SB 203580	kinase inhibitor
SB 202190	kinase inhibitor
Indirubin-3'-monoxime	kinase inhibitor
Indirubin	kinase inhibitor
PP2	kinase inhibitor
Piceatannol	kinase inhibitor
Staurosporine	kinase inhibitor
RG-14620	kinase inhibitor
GF-109203X	kinase inhibitor
Tyrphostin AG-825	kinase inhibitor
Tyrphostin AG-126	kinase inhibitor
Tyrphostin 9	kinase inhibitor
U-0126	kinase inhibitor
Y-27632	kinase inhibitor
ZM336372	kinase inhibitor
Wortmannin	kinase inhibitor
REV-5901	lipoxygenase inhibitor
BW-B 70C	lipoxygenase inhibitor
AA-861	lipoxygenase inhibitor
CDC	lipoxygenase inhibitor
Nocodazole	microtubule poison
Taxol = Paclitaxel	microtubule poison
Vinblastine	microtubule poison
Estradiol	microtubule poison
Amantidine	Misc. channels
Fipronil	Misc. channels
IAA-94	Misc. channels
Niflumic acid	Misc. channels
N-Phenylanthranilic acid	Misc. channels
NPPB	Misc. channels
FCCP	mitochondrial uncoupler
Blebbistatin	myosin II inhibitor
Wiskostatin	N-WASP inhibitor
Monensin	Na+ ionophore
Ouabain	Na+K+ATPase inhibitor
Bumetanide	Na+K+Cl- cotransport inhibitor
MAPP; L-erythro	Negative control for D-erythro-MAPP
Helenalin	NFkappaB inhibitor
Curcumin	NFkappaB inhibitor
Epibatidine ()	nicotinic cholinergic agonist
Furoxan	NO donor
1400W	NOS inhibitor
Bromo-7-nitroindazole [3-Bromo-7-nitroindazole]	NOS inhibitor
Diphenyleneiodonium Cl	NOS inhibitor
L-NAME	NOS inhibitor
Thiocitrulline [L-Thiocitrulline HCl]	NOS inhibitor
Pifithrin	p53 inhibitor
PRIMA-1	p53 reactivator
PAF C16	PAF receptor ligand
PAF C18	PAF receptor ligand
PAF C18:1	PAF receptor ligand
Amino-1;8-naphthalimide [4-Amino-1;8-naphthalimide]	PARP inhibitor
Phenanthridinone [6(5H)-Phenanthridinone]	PARP inhibitor
Calyculin A	phosphatase inhibitor
Cantharidin	phosphatase inhibitor
CinnGEL 2Me	phosphatase inhibitor
NSC-95397	phosphatase inhibitor
Okadaic acid	phosphatase inhibitor
RK-682	phosphatase inhibitor
RWJ-60475-(AM)3	phosphatase inhibitor
Tyrphostin 1	phosphatase inhibitor
Zardaverine	phosphodiesterase inhibitor
Zaprinast	phosphodiesterase inhibitor
Vinpocetine	phosphodiesterase inhibitor
Trequinsin	phosphodiesterase inhibitor
Siguazodan	phosphodiesterase inhibitor
Rolipram	phosphodiesterase inhibitor
Ro 20-1724	phosphodiesterase inhibitor
MY-5445	phosphodiesterase inhibitor
Milrinone	phosphodiesterase inhibitor
8-Methoxymethyl-IBMX	phosphodiesterase inhibitor
MBCQ	phosphodiesterase inhibitor
Dipyridamole	phosphodiesterase inhibitor
EHNA HCl	phosphodiesterase inhibitor
IBMX	phosphodiesterase inhibitor
OBAA	phospholipase inhibitor
Aristolochic acid	phospholipase inhibitor
D609	phospholipase inhibitor
Manoalide	phospholipase inhibitor
U73122	phospholipase inhibitor
Juglone	PIN1 inhibitor
Bromo-cAMP [8-Bromo-cAMP]	PKA activator
Dibutyrylcyclic AMP	PKA activator
Dibutyrylcyclic GMP	PKA activator
Phorbol 12 myristate 13 acetate	PKC activator
1;2-Didecanoyl-glycerol (10:0)	PKC activator
1;2-Dioctanoyl-sn-glycerol	PKC activator
1;2-Dioleoyl-glycerol (18:1)	PKC activator
Bromo-cGMP [8-Bromo-cGMP]	PKG activator
4-Aminopyridine	Potassium channels
5-Hydroxydecanoate	Potassium channels
AM 92016	Potassium channels
Diazoxide	Potassium channels
E-4031	Potassium channels
Flufenamic acid	Potassium channels
Fluspiriline	Potassium channels
Glipizide	Potassium channels
Glyburide	Potassium channels
Minoxidil	Potassium channels
Minoxidil sulfate	Potassium channels
NS-1619	Potassium channels
Paxilline	Potassium channels
PCO-400	Potassium channels
Penitrem A	Potassium channels
Phentolamine	Potassium channels
Pinacidil	Potassium channels
Propafenone	Potassium channels
Quinine	Potassium channels
Tolazamide	Potassium channels
Tolbutamide	Potassium channels
U-37883A	Potassium channels
ZM226600	Potassium channels
Ciglitazone	PPAR ligand
Clofibrate	PPAR ligand
Tetrahydrocannabinol-7-oic acid	PPAR ligand
WY-14643	PPAR ligand
Bezafibrate	PPAR ligand
BADGE	PPAR ligand
GW-9662	PPAR ligand
Cycloheximide-N-ethylethanoate	prolyl cis-trans isomerase inhibitor
Ascomycin (FK-520)	prolyl cis-trans isomerase inhibitor
Cyclosporin A	prolyl cis-trans isomerase inhibitor
FK-506	prolyl cis-trans isomerase inhibitor
Rapamycin	prolyl cis-trans isomerase inhibitor
Dimethyloxaloylglycine	Prolyl-4-hydroxylase inhibitor
13;14-Dihydro-prostaglandin E1	prostaglandin
15d-Prostaglandin J2	prostaglandin
16;16-Dimethyl-prostaglandin E2	prostaglandin
17-Phenyl-trinor-prostaglandin E2	prostaglandin
8-EPI-prostaglandin F2?	prostaglandin
9alpha;11beta-Prostaglandin F2	prostaglandin
9beta;11alpha-Prostaglandin F2	prostaglandin
Cloprostenol Na	prostaglandin
Delta 12-Prostaglandin J2	prostaglandin
Misoprostol; free acid	prostaglandin
Prostaglandin A1	prostaglandin
Prostaglandin A2	prostaglandin
Prostaglandin B1	prostaglandin
Prostaglandin B2	prostaglandin
Prostaglandin D2	prostaglandin
Prostaglandin E1	prostaglandin
Prostaglandin E2	prostaglandin
Prostaglandin F1?	prostaglandin
Prostaglandin F2?	prostaglandin
Prostaglandin I2 Na	prostaglandin
Prostaglandin J2	prostaglandin
Nafamostst mesylate	protease inhibitor
Shikonin	protease inhibitor
Tosyl-Phe-CMK (TPCK)	protease inhibitor
Thiorphan	protease inhibitor
Z-Prolyl-prolinal	protease inhibitor
NapSul-Ile-Trp-CHO	protease inhibitor
3;4-Dichloroisocoumarin	protease inhibitor
Boc-GVV-CHO	protease inhibitor
Bestatin	protease inhibitor
Ala-Ala-Phe-CMK	protease inhibitor
MDL-28170	protease inhibitor
Ac-Leu-Leu-Nle-CHO	protease inhibitor
MG-132	proteasome inhibitor
CA-074-Me	protease inhibitor
Calpeptin	protease inhibitor
E-64-d	protease inhibitor
GM6001	protease inhibitor
Leupeptin	protease inhibitor
Gliotoxin	protease inhibitor
Pepstatin	protease inhibitor
Z-Leu3-VS	proteasome inhibitor
Z-VAD-FMK	protease inhibitor
Swainsonine	protein glycosylation inhibitor
Tunicamycin	protein glycosylation inhibitor
13-cis Retinoic acid	retinoid receptor ligand
4-Hydroxyphenylretinamide	retinoid receptor ligand
9-cis Retinoic acid	retinoid receptor ligand
AM-580	retinoid receptor ligand
Methoprene acid	retinoid receptor ligand
Retinoic acid; all trans	retinoid receptor ligand
TTNPB	retinoid receptor ligand
Serotonin	serotonin receptor agonist
Splitomycin	sir2p inhibitor
Resveratrol	SIRT1 activator
Aconitine	Sodium channels
Flecainide	Sodium channels
Grayanotoxin III	Sodium channels
Lidocaine	Sodium channels
Phenamil	Sodium channels
Phenytoin	Sodium channels
Procainamide	Sodium channels
Quinidine	Sodium channels
QX-314	Sodium channels
SDZ-201106	Sodium channels
Veratridine	Sodium channels
DL-Dihydrosphingosine	Sphingosine kinase inhibitor
N;N-Dimethylsphingosine	Sphingosine kinase inhibitor
Dexamethasone	steroid hormone
Pregnenolone 16? carbonitrile	steroid hormone
24(S)-Hydroxycholesterol	steroid hormone
Bafilomycin A1	vacuolar ATPase inhibitor
Arvanil	vanilloid receptor ligand
Capsacin(E)	vanilloid receptor ligand
Capsazepine	vanilloid receptor ligand
1;25-Dihydroxyvitamin D3	Vitamin D receptor ligand
24;25-Dihydroxyvitamin D3	Vitamin D receptor ligand
25-Hydroxyvitamin D3	Vitamin D receptor ligand
Kavain ()	voltage-dependent Na channel inhibitor
