# Supplementary material for: Large-scale cytological profiling for functional analysis of bioactive compounds
Source: Royal Society of Chemistry journal article supplement (doi:10.1039/c3mb70245f), 2013-08-20
Supplement: c3mb70245f_2.pdf [file c3mb70245f_2.pdf]

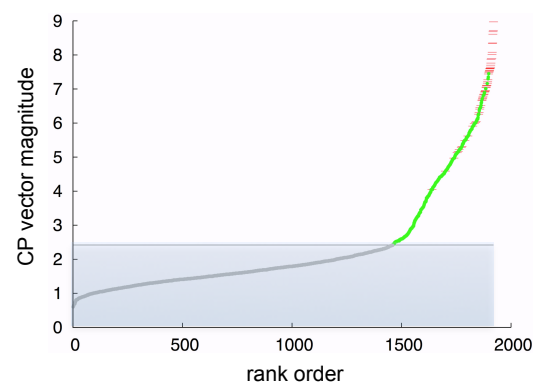

Supplemental Figure 2. Elimination of weak phenotypes and toxic doses. The shaded region represents compound-dose instances whose CP vector magnitudes fell below the cutoff, set to 2.4 (460 instances). Red hashes represent instances that were eliminated due to toxicity (61 instances). Green marks represent instances that passed both the weakness and toxicity tests (399 instances; 222 compounds).
