# Supplementary material for: Large-scale cytological profiling for functional analysis of bioactive compounds
Source: Royal Society of Chemistry journal article supplement (doi:10.1039/c3mb70245f), 2013-08-20
Supplement: c3mb70245f_2.xlsx [file c3mb70245f_2.xlsx]

## Sheet: READ ME
Instructions for using GSEA to analyze CP data
Launch GSEA from http://www.broadinstitute.org/gsea/index.jsp (registration and login required)
Save the three sheets in this spreadsheet as separate text files with the extensions shown.
In GSEA program, load the 3 data files:
compound_classes.cls
cytological_profiles.gct
feature_categories.gmt
Run GSEA
Settings:
Expression Dataset: cytological_profiles.gct
feature_categories.gmt
Phenotype labels: select compound classes to distinguish
Collapse dataset to gene symbols: false
Permutation type: phenotype
Chip platform: none

## Sheet: cytological_profiles.gct
#1.2
195	399
NAME	Description	1-Octadecyl-2-methylglycero-3 PC - bioactive lipid_0.200	10-Hydroxycamptothecin - Inhibits DNA synthesis_0.110	10-Hydroxycamptothecin - Inhibits DNA synthesis_0.549	10-Hydroxycamptothecin - Inhibits DNA synthesis_13.7	10-Hydroxycamptothecin - Inhibits DNA synthesis_2.74	13(S)-HPODE - bioactive lipid_0.0200	13-cis Retinoic acid - retinoid receptor ligand_0.200	15-Ketoeicosatetraenoic acid - bioactive lipid_0.000800	16;16-Dimethyl-prostaglandin E2 - prostaglandin_0.0400	17-Allylamino-geldanamycin - HSP-90 inhibitor_0.0683	17-Allylamino-geldanamycin - HSP-90 inhibitor_0.341	17-Allylamino-geldanamycin - HSP-90 inhibitor_1.71	17-Allylamino-geldanamycin - HSP-90 inhibitor_8.54	17-Octadecynoic acid - bioactive lipid_0.200	17-Octadecynoic acid - bioactive lipid_1.00	2-APB - IP3 receptor blocker_22.2	2-Arachidonoylglycerol - cannabinoid receptor ligand_0.0400	25-Hydroxyvitamin D3 - Vitamin D receptor ligand_0.00800	2;5-Ditertbutylhydroquinone - ER Ca++ ATPase inhibitor_4.50	3;4-Dichloroisocoumarin - protease inhibitor_23.3	3;4-Dichloroisocoumarin - protease inhibitor_4.65	5(S)-HPETE - bioactive lipid_0.000800	5-Iodotubercidin - kinase inhibitor_0.102	5-Iodotubercidin - kinase inhibitor_0.510	5-Iodotubercidin - kinase inhibitor_12.8	5-Iodotubercidin - kinase inhibitor_2.55	5;6-Epoxyeicosatrienoic acid - bioactive lipid_0.00400	5;8;11-Eicosatriynoic acid - bioactive lipid_0.00800	5;8;11-Eicosatriynoic acid - bioactive lipid_0.0400	6-Formylindolo [3;2-B] carbazole - bioactive lipid_0.00800	6-Formylindolo [3;2-B] carbazole - bioactive lipid_0.0400	8-EPI-prostaglandin F2? - prostaglandin_0.00800	8;9-Epoxyeicosatrienoic acid - bioactive lipid_0.0200	A-23187 - Calcium ionophore_0.382	A-3 - kinase inhibitor_17.6	AG-1296 - kinase inhibitor_0.751	AG-1296 - kinase inhibitor_18.8	AG-1296 - kinase inhibitor_3.76	AG-370 - kinase inhibitor_19.3	AG-490 - kinase inhibitor_17.0	AG-879 - kinase inhibitor_3.16	AG1478 - kinase inhibitor_14.2	AG213 (Tyrphostin 47) - kinase inhibitor_0.182	AM 92016 - Potassium channels_10.3	Ac-Leu-Leu-Nle-CHO - protease inhibitor_13.0	Ac-Leu-Leu-Nle-CHO - protease inhibitor_2.61	Acetyl (N)-S-farnesyl-L-cysteine - farnesylation inhibitor_0.109	Acetyl (N)-S-farnesyl-L-cysteine - farnesylation inhibitor_2.72
All_ACTIN_Mean_Cell_Aver_Intens_MultiWaveScoring_cyto	na	0.218668	-0.182987	-0.0544243	0.210836	0.24471	-0.303717	-0.193178	0.229096	0.320723	0.181731	0.119008	-0.186376	-0.164022	-0.353043	-0.147111	0.0277731	0.339596	0.200297	0.0390502	-0.445456	-0.392933	0.239544	0.181036	0.126651	0.106754	0.0857159	0.169437	0.171958	0.301177	0.271161	0.169437	0.281517	0.218668	-0.314259	0.299072	0.0762686	0.210836	0.24232	0.0939857	-0.194844	-0.159661	-0.139758	0.228821	-0.164451	-0.0924539	-0.157394	0.224409	0.343239
All_ACTIN_Mean_Cyto_Aver_Intens_MultiWaveScoring_cyto	na	0.234744	-0.201556	0.0549394	0.225557	0.238726	0.285234	-0.203494	0.243897	0.321238	0.157224	0.105307	-0.191913	-0.168879	-0.33603	0.15791	0.00756113	0.294768	0.206642	0.0472467	-0.424822	-0.409621	0.222757	0.11952	0.16033	0.0700786	0.0778333	0.187966	0.149901	0.318113	0.22386	0.254204	0.222757	0.189615	-0.280307	0.175312	0.101968	0.225557	0.244793	0.145656	-0.222616	-0.191913	-0.195165	0.220674	-0.146391	-0.155153	-0.142158	0.210808	0.320344
All_ACTIN_Mean_Nucl_Integr_Intens_MultiWaveScoring_cyto	na	0.133558	0.580081	0.478458	0.361408	0.306166	-0.12892	-0.220716	0.216963	0.25629	0.287642	0.362736	-0.12892	-0.128986	-0.12892	-0.0464668	-0.0138313	0.268742	0.218428	-0.10831	-0.239216	-0.0446911	0.218428	0.458651	0.556045	0.483279	0.421507	-0.041935	0.155684	0.0448647	-0.158247	-0.103458	0.218428	0.133558	-0.437565	0.459309	-0.256901	0.0869942	0.133558	0.07967	-0.0464668	-0.12892	-0.0721016	0.218428	-0.239216	0.339436	0.133436	0.166059	-0.0842419
All_ACTIN_Mean_Stain_Area_MultiWaveScoring_cyto	na	-0.0780449	0.148578	0.188139	0.271032	0.191448	-0.249554	-0.188396	-0.22456	-0.207819	0.201733	0.209894	-0.184612	-0.18009	-0.188396	-0.233068	0.127045	-0.168879	-0.188671	-0.1444	-0.1724	0.0684013	-0.282177	0.0598363	0.213927	0.615257	0.377797	-0.306574	-0.209545	-0.37298	-0.361523	-0.309504	-0.327831	-0.060833	0.118586	0.230505	-0.123468	-0.0476437	-0.0631523	-0.10465	0.198034	0.0952568	0.0890255	-0.22456	-0.0242062	0.321692	0.400066	-0.289379	-0.233562
All_ACTIN_Mean_Stain_Integr_Intens_MultiWaveScoring_cyto	na	-0.0432587	0.249344	0.304939	0.323581	0.274094	-0.220261	-0.238327	-0.0532989	-0.138069	0.404007	0.406868	-0.11528	-0.102135	-0.147141	-0.220517	0.0524448	-0.110237	-0.0946808	-0.0502677	-0.216289	-0.0226288	-0.115921	0.192996	0.397953	0.361666	0.403679	-0.305672	-0.159988	-0.305672	-0.293411	-0.298592	-0.0896759	-0.0430145	-0.0191727	0.343189	-0.17823	-0.0331397	-0.0852509	0.103207	-0.108752	-0.101364	-0.0654007	-0.0946808	-0.0485808	0.361203	0.278366	-0.0896759	-0.0946503
All_Cells_Mean_Area_MultiWaveScoring_EdU	na	-0.0240192	0.546713	0.644664	0.40234	0.657686	0.657686	0.6113	-0.072361	-0.12676	0.0910378	0.103323	0.0536823	0.0897179	-0.0766315	-0.0784874	-0.231446	0.0554714	-0.158054	-0.498343	-0.496944	-0.641573	-0.072361	0.162764	0.562687	0.496862	0.578491	-0.125784	-0.158054	-0.174124	-0.158054	-0.125784	-0.149509	0.0125446	-0.110647	-0.367428	-0.125784	0.0307579	0.00265694	-0.286495	0.212765	0.00265694	-0.367428	-0.158054	-0.329342	0.213619	0.397676	-0.0763893	-0.0766315
All_EdU_Mean_Cell_Aver_Intens_MultiWaveScoring_EdU	na	0.342901	-0.502832	-0.483179	-0.642715	-0.53797	-0.539923	-0.52088	0.467432	0.409937	-0.547266	-0.456812	-0.539923	-0.642715	0.458868	0.591934	-0.280021	0.36294	0.439478	-0.354454	-0.571915	-0.536016	0.340601	-0.399117	-0.541213	-0.280021	-0.6198	0.37649	0.439478	0.172632	0.32583	0.344629	0.32583	0.417974	-0.178492	-0.494766	-0.481226	-0.626114	-0.539923	0.451309	-0.494766	-0.477667	-0.626114	0.416895	-0.495865	-0.642715	-0.536016	0.467432	-0.45606
All_EdU_Mean_Cell_Integr_Intens_MultiWaveScoring_EdU	na	0.22826	-0.469408	-0.342167	-0.540497	-0.533924	-0.507557	-0.0778694	0.423021	0.288103	-0.526049	-0.383427	-0.533924	-0.556854	0.423627	0.860321	-0.354792	0.27747	0.353807	-0.527574	-0.553192	-0.530506	0.266161	-0.283163	-0.5038	-0.603955	-0.542118	0.297245	0.424486	0.101688	0.185228	0.277592	0.0930653	0.434193	-0.159672	-0.55014	-0.40015	-0.604462	-0.533924	0.391571	-0.336884	-0.484486	-0.556854	0.37285	-0.423187	-0.555389	-0.533924	0.353807	-0.443348
All_EdU_Mean_Nucl_Aver_Intens_MultiWaveScoring_EdU	na	0.342901	-0.502832	-0.483179	-0.642715	-0.53797	-0.539923	-0.52088	0.467432	0.409937	-0.547266	-0.456812	-0.539923	-0.642715	0.458868	0.591934	-0.280021	0.36294	0.439478	-0.354454	-0.571915	-0.536016	0.340601	-0.399117	-0.541213	-0.280021	-0.6198	0.37649	0.439478	0.172632	0.32583	0.344629	0.32583	0.417974	-0.178492	-0.494766	-0.481226	-0.626114	-0.539923	0.451309	-0.494766	-0.477667	-0.626114	0.416895	-0.495865	-0.642715	-0.536016	0.467432	-0.45606
All_EdU_Mean_Nucl_Integr_Intens_MultiWaveScoring_EdU	na	0.22826	-0.469408	-0.342167	-0.540497	-0.533924	-0.507557	-0.0778694	0.423021	0.288103	-0.526049	-0.383427	-0.533924	-0.556854	0.423627	0.860321	-0.354792	0.27747	0.353807	-0.527574	-0.553192	-0.530506	0.266161	-0.283163	-0.5038	-0.603955	-0.542118	0.297245	0.424486	0.101688	0.185228	0.277592	0.0930653	0.434193	-0.159672	-0.55014	-0.40015	-0.604462	-0.533924	0.391571	-0.336884	-0.484486	-0.556854	0.37285	-0.423187	-0.555389	-0.533924	0.353807	-0.443348
All_EdU_Mean_Stain_Area_MultiWaveScoring_EdU	na	-0.0370827	-0.135792	-0.298601	-0.439827	-0.838352	0.429539	0.58884	0.0316658	0.0832691	-0.436329	-0.330462	-0.538914	-0.454597	0.379612	0.329109	-0.588716	0.167742	0.10088	-0.368641	0.383186	-0.511936	0.0282478	-0.0956251	-0.599702	-0.876384	-0.557745	0.124529	0.0740242	-0.0957203	-0.0630379	0.0684986	-0.118092	0.0434303	-0.104265	-0.277107	-0.436052	-0.49366	-0.586399	-0.164925	0.347786	-0.444431	-0.399422	0.0740242	-0.368904	-0.37574	-0.460178	0.114063	-0.319553
All_EdU_Mean_Stain_Aver_Intens_MultiWaveScoring_EdU	na	0.586254	-0.535301	-0.471712	-0.605183	-0.506176	-0.510082	-0.45393	0.419823	0.430086	-0.469627	-0.412874	-0.468822	-0.611042	0.158642	0.608112	-0.283834	0.334749	0.361961	-0.126858	-0.605183	-0.506176	0.373192	-0.340356	-0.482387	-0.669297	-0.555804	0.334749	0.451439	0.334749	0.45034	0.324373	0.45034	0.621655	-0.233309	-0.54073	-0.312777	-0.563679	-0.454174	0.55744	-0.565266	-0.468822	-0.487995	0.419823	-0.226276	-0.605183	-0.413891	0.45034	-0.342113
All_EdU_Mean_Stain_Integr_Intens_MultiWaveScoring_EdU	na	0.162771	-0.51915	-0.407648	-0.833063	-0.750553	-0.457462	-0.283878	0.353745	0.27866	-0.514755	-0.398859	-0.501041	-0.592829	0.284	0.477594	-0.662657	0.311457	0.340317	-0.483669	-0.600641	-0.500553	0.207748	-0.354427	-0.764052	-0.853679	-0.832092	0.336115	0.364975	0.0518131	0.174057	0.238581	0.107651	0.457584	-0.149347	-0.550104	-0.395197	-0.551813	-0.439518	0.354425	-0.291193	-0.378727	-0.551813	0.353745	-0.444635	-0.582575	-0.492741	0.358139	-0.437443
All_Nuclei_Mean_Area_MultiWaveScoring_EdU	na	-0.0240192	0.546713	0.644664	0.40234	0.657686	0.657686	0.6113	-0.072361	-0.12676	0.0910378	0.103323	0.0536823	0.0897179	-0.0766315	-0.0784874	-0.231446	0.0554714	-0.158054	-0.498343	-0.496944	-0.641573	-0.072361	0.162764	0.562687	0.496862	0.578491	-0.125784	-0.158054	-0.174124	-0.158054	-0.125784	-0.149509	0.0125446	-0.110647	-0.367428	-0.125784	0.0307579	0.00265694	-0.286495	0.212765	0.00265694	-0.367428	-0.158054	-0.329342	0.213619	0.397676	-0.0763893	-0.0766315
All_Nuclei_Mean_Area_MultiWaveScoring_cyto	na	-0.0799179	0.518346	0.671598	0.408569	0.555016	-0.0967636	-0.156334	-0.0939484	-0.185921	0.0659943	0.0750809	0.0938339	0.0482178	-0.0967636	-0.090332	-0.0214479	-0.101448	-0.0766144	-0.181714	-0.471313	-0.279625	-0.0766144	0.387697	0.522595	0.590156	0.505863	-0.185921	-0.0766144	-0.185921	-0.108841	-0.185921	-0.172318	0.00154877	-0.236214	-0.166138	-0.185921	0.0146484	0.0201035	0.0336914	0.171021	0.0413437	-0.167969	-0.108841	-0.20105	0.436646	0.50692	-0.108841	-0.156334
All_Nuclei_Mean_Average_Itensity_MultiWaveScoring_EdU	na	0.00772476	-0.315929	-0.211592	-0.00775909	0.00772476	0.00772476	0.00772476	0.0275993	0.0253124	0.673189	0.531904	0.00772476	0.0608597	-0.00137711	-0.00775909	0.023941	0.0215282	0.0554314	0.141379	0.721504	0.279697	0.0275993	0.491976	-0.0381535	0.264699	-0.0561038	-0.0489941	0.0610466	-0.0427685	0.0275993	-0.0489941	0.0275993	0.00772476	-0.0489941	0.594063	0.0253124	-0.00775909	0.00772476	0.00177765	0.00177765	0.00772476	0.137276	0.0554314	0.141182	0.00177765	0.00772476	0.0275993	0.00772476
All_Nuclei_Mean_Average_Itensity_MultiWaveScoring_cyto	na	0.126286	-0.110695	-0.214224	-0.112118	-0.302433	0.155338	-0.132389	0.173195	0.116568	0.40053	0.315908	-0.0813637	-0.112118	-0.102726	-0.0457115	0.0293947	0.0798244	0.200172	0.177978	0.546078	0.320866	0.177467	0.284456	-0.155641	-0.109752	-0.0799036	0.0798244	0.0735855	0.0798244	0.121071	-0.100088	0.173195	0.158268	0.011343	0.410458	0.0743313	-0.0105553	-0.0813637	-0.112118	-0.112118	-0.132389	-0.0105553	0.264626	-0.00664902	-0.00664902	-0.132389	0.173195	0.155338
All_Nuclei_Mean_Integr_Itensity_MultiWaveScoring_EdU	na	0	0.543953	0.561916	0.194492	0	0.25	0.140625	-0.0261307	0.026516	0.87159	0.632961	0	0.359165	0	-0.082798	-0.0970854	0.0201683	-0.0727615	-0.0796077	0.359165	0	-0.0841141	0.484764	0.63482	0.615047	0.475255	0.026516	-0.0841141	-0.240627	-0.0727615	-0.0338402	-0.126717	0	-0.0338402	0.359165	0.026516	0.00857925	0	-0.082798	0.0731544	0	-0.0338478	-0.0107498	0.199986	0.541294	0	-0.0107498	0
All_Nuclei_Mean_Integr_Itensity_MultiWaveScoring_cyto	na	0.0737076	0.515158	0.384903	0.0768681	0.0737076	-0.0297623	-0.12986	0.0343227	-0.0523834	0.847433	0.442032	0.0737076	-0.0238895	-0.0776138	-0.0902958	0.010357	-0.0523834	0.0709438	-0.0380948	0.133875	0.179543	0.0709438	0.394962	0.525253	0.595248	0.327637	-0.0523834	0.0343227	-0.0523834	-0.0969448	-0.0374908	0.0343227	0.0278091	-0.0355377	0.310144	-0.0523834	-0.0238895	0.0278091	-0.0724735	0.017786	-0.0297623	-0.138025	0.154684	-0.138025	0.544031	0.277321	0.0343227	-0.0297623
All_PH3_Mean_Cell_Aver_Intens_MultiWaveScoring_EdU	na	-0.000829697	-0.248051	-0.521519	-0.310368	-0.226904	0.246435	-0.226904	3.81e-06	-0.0205421	0.250492	0.610142	0.246435	0.44611	-0.0104733	-0.0359535	-0.000248812	-0.0156593	3.81e-06	-0.0223182	0.236637	-0.226904	3.81e-06	0.536388	-0.285526	-0.252062	-0.159386	-0.0156593	3.81e-06	-0.0156593	3.81e-06	-0.124058	3.81e-06	-0.000829697	-0.250523	0.404118	-0.056675	-0.194889	-0.12351	0.0984535	-0.00470352	-0.000829697	-0.0186195	3.81e-06	-0.0637856	0.0359535	-0.000829697	3.81e-06	-0.000829697
All_PH3_Mean_Cell_Integr_Intens_MultiWaveScoring_EdU	na	-0.001688	0.155121	0.110079	-0.0308018	0.0820103	0.603006	0.387186	-0.0706482	-0.139132	0.678436	0.576632	0.508036	0.490397	-0.00840187	-0.118326	-0.00230875	0.0697956	-0.0569763	-0.286504	-0.0579014	-0.335917	-0.162445	0.543701	0.111904	-0.00230875	-0.00207971	-0.0419636	-0.0706482	-0.139132	-0.139252	-0.139009	-0.0706482	0.0262241	-0.326143	-0.0123692	-0.139009	-0.210001	-0.0463657	-0.0123692	0.0251865	0.0820103	-0.127481	-0.147308	-0.354654	0.298014	0.0820103	-0.0865173	-0.00840187
All_PH3_Mean_Nucl_Aver_Intens_MultiWaveScoring_EdU	na	-0.000829697	-0.248051	-0.521519	-0.310368	-0.226904	0.246435	-0.226904	3.81e-06	-0.0205421	0.250492	0.610142	0.246435	0.44611	-0.0104733	-0.0359535	-0.000248812	-0.0156593	3.81e-06	-0.0223182	0.236637	-0.226904	3.81e-06	0.536388	-0.285526	-0.252062	-0.159386	-0.0156593	3.81e-06	-0.0156593	3.81e-06	-0.124058	3.81e-06	-0.000829697	-0.250523	0.404118	-0.056675	-0.194889	-0.12351	0.0984535	-0.00470352	-0.000829697	-0.0186195	3.81e-06	-0.0637856	0.0359535	-0.000829697	3.81e-06	-0.000829697
All_PH3_Mean_Nucl_Integr_Intens_MultiWaveScoring_EdU	na	-0.001688	0.155121	0.110079	-0.0308018	0.0820103	0.603006	0.387186	-0.0706482	-0.139132	0.678436	0.576632	0.508036	0.490397	-0.00840187	-0.118326	-0.00230875	0.0697956	-0.0569763	-0.286504	-0.0579014	-0.335917	-0.162445	0.543701	0.111904	-0.00230875	-0.00207971	-0.0419636	-0.0706482	-0.139132	-0.139252	-0.139009	-0.0706482	0.0262241	-0.326143	-0.0123692	-0.139009	-0.210001	-0.0463657	-0.0123692	0.0251865	0.0820103	-0.127481	-0.147308	-0.354654	0.298014	0.0820103	-0.0865173	-0.00840187
All_PH3_Mean_Nucl_Integr_Intens_MultiWaveScoring_cyto	na	-0.0210514	-0.0935593	0.27398	0.0383449	0.127985	-0.0210514	-0.0210514	-0.142143	-0.240402	0.460503	0.32784	0.161554	0.223149	-0.0210514	-0.0598522	0.0134321	-0.148521	-0.0332565	-0.166175	0.0121194	-0.177423	-0.231987	0.439546	0.189978	-0.000422886	-0.0382457	-0.155782	-0.109673	-0.240402	-0.155571	-0.155782	-0.109673	-0.0210514	-0.412491	0.567205	-0.240402	-0.129521	-0.0210514	-0.014264	0.130073	0.0543766	-0.191776	-0.0245895	-0.129521	0.332493	0.127985	-0.142143	-0.0210514
All_PH3_Mean_Stain_Area_MultiWaveScoring_EdU	na	0.00157928	-0.815498	-0.389927	-0.551361	-0.329704	0.674431	-0.329704	0.0112991	-0.00174332	0.592517	0.678989	0.690056	0.567352	0.00157928	-0.058197	-0.0626557	-0.00174332	-0.00153351	-0.0878377	0.4664	0.0186691	-0.00153351	0.578314	-0.133532	-0.309656	-0.362949	-0.00174332	-0.0230179	-0.00174332	-0.0133743	-0.0284767	0.0112991	0.00157928	-0.389927	0.0978699	-0.102085	-0.551361	-0.329704	0.392181	-0.058197	0.0186691	-0.551361	-0.0407181	-0.111176	-0.0135193	0.257439	-0.00153351	0.0186691
All_PH3_Mean_Stain_Area_MultiWaveScoring_cyto	na	5.72e-06	-0.850401	-0.424866	0	-0.0227108	0.0241756	5.72e-06	-0.0651226	-0.0147095	0.539529	0.629944	0.83814	0.375	5.72e-06	0	0.010146	-0.0147095	0.0386333	-0.240789	0.8125	-0.0227108	-0.0186138	0.639696	-0.30366	-0.26182	-0.240789	0.000549316	-0.0651226	-0.0147095	-0.0486431	-0.0147095	0.0105572	0.0241756	-0.424866	0	-0.046936	0	-0.0227108	0	0	0.0241756	0	0.0337505	0	0	-0.0227108	-0.0180035	-0.0227108
All_PH3_Mean_Stain_Aver_Intens_MultiWaveScoring_EdU	na	0.0210056	0.187727	-0.349264	0.123545	-0.382456	-0.310434	-0.575449	-0.0187817	0.0102749	-0.581282	-0.594015	-0.490976	-0.0605564	-0.0249119	-0.0572605	0.0879457	-0.0252895	0.041975	-0.060367	-0.530039	-0.528574	-0.0439281	-0.307656	0.324467	-0.378613	-0.48437	0.0564175	0.041975	-0.0252895	0.0178051	-0.0254116	-0.00388908	0.129892	-0.0594692	0.114756	0.220602	0.0329685	0.134287	-0.353891	0.0760593	0.129892	0.328012	0.0396557	0.174814	0.17396	-0.490976	-0.0632153	-0.0437107
All_PH3_Mean_Stain_Aver_Intens_MultiWaveScoring_cyto	na	0.0802803	-0.198952	-0.378156	0.054306	-0.230671	-0.0498848	-0.0498848	-0.0175552	-0.0578737	-0.506935	-0.584773	-0.587482	-0.21666	-0.104816	0.0584564	0.0332687	-0.152727	-0.0121841	0.0634535	-0.492416	-0.442829	-0.116798	-0.320677	0.298024	-0.519841	-0.60147	-0.152727	-0.111183	-0.0578737	-0.116798	-0.0578737	0.0378189	0.0335274	-0.134069	0.222397	-0.152727	-0.134384	0.0335274	-0.295151	-0.00596619	0.0802803	0.019516	-0.0423355	0.272812	0.334213	0.122272	-0.0423355	0.0180244
All_PH3_Mean_Stain_Integr_Intens_MultiWaveScoring_EdU	na	0.0294399	-0.815247	-0.798077	-0.665668	-0.194479	0.676413	-0.194479	0.0209351	-0.0129204	0.596497	0.607159	0.628805	0.474018	0.000387192	-0.0612984	0.022952	-0.00510788	-0.00445557	-0.115751	0.36208	-0.194479	-0.00445557	0.608172	-0.457077	-0.0239286	-0.411928	-0.00510788	-0.00445557	-0.00510788	0.0209351	-0.0949516	-0.00445557	0.000387192	-0.798077	0.393208	-0.0949516	-0.369892	-0.194479	0.108662	-0.0938911	0.0294399	-0.154682	-0.0652466	-0.158588	0.0709419	0.0294399	-0.00445557	0.0294399
All_PH3_Mean_Stain_Integr_Intens_MultiWaveScoring_cyto	na	0.00185394	-0.777683	-0.803926	-0.455202	-0.0121078	-0.0121078	-0.0121078	-0.101902	-0.155489	0.319309	0.537569	0.546776	0.307009	-0.0121078	0.00891304	0.138742	-0.155489	-0.00766373	-0.316667	0.429323	-0.0121078	-0.139988	0.361728	-0.51058	-0.0575479	-0.316667	-0.0800495	-0.197239	-0.155489	-0.0551491	-0.0229206	0.0876198	0.00185394	-0.368746	0.117311	-0.214815	-0.146608	-0.0121078	0.00891304	0.0474873	0.00185394	-0.146608	-0.0182838	0.00891304	0.215212	-0.0121078	-0.0704079	-0.0121078
All_TUBULIN_Mean_Cell_Aver_Intens_MultiWaveScoring_cyto	na	0.175768	0.161583	0.0484524	0.746155	-0.0825062	-0.0825062	-0.139147	0.232233	0.223501	0.110143	0.176138	-0.139147	-0.0161743	-0.0825062	-6.1e-05	0.0301729	0.472959	0.161583	0.021795	-0.252014	-0.531725	0.228985	0.0958062	0.0691285	0.00387542	-0.0243759	0.327749	0.153556	0.371328	0.193936	0.381704	0.256988	0.175768	-0.314688	-6.1e-05	-0.0279446	-6.1e-05	0.066637	0.0894165	-6.1e-05	-0.139147	-6.1e-05	0.118507	-6.1e-05	-6.1e-05	-0.139147	0.256988	-0.0825062
All_TUBULIN_Mean_Cyto_Aver_Intens_MultiWaveScoring_cyto	na	0.174059	0.133236	0.220461	0.682678	-0.0915394	-0.0915394	-0.140856	0.233451	0.261354	0.0431626	0.111208	-0.0816517	-6.1e-05	-0.0915394	-6.1e-05	0.00656875	0.41835	0.0980952	0.0535608	-0.252014	-0.522692	0.231	0.0549917	0.0667476	0.0342613	0.01687	0.363894	0.142274	0.386477	0.231	0.388308	0.231	0.174059	-0.345705	-6.1e-05	-0.0524921	-6.1e-05	0.106554	0.0894165	-6.1e-05	-0.140856	-6.1e-05	0.133236	-6.1e-05	-6.1e-05	-0.140856	0.231	0.0652943
All_TUBULIN_Mean_Nucl_Aver_Intens_MultiWaveScoring_cyto	na	0.0641956	-0.243431	-0.0368919	0.727539	0.0641956	-0.0705433	-0.0705433	0.207647	0.104275	0.295147	0.398098	-0.0705433	-0.000976563	-0.0705433	-0.000976563	0.105118	0.493679	0.122353	-3.11e-05	-0.000976563	-0.0705433	0.149375	0.304737	0.020214	-0.030899	-3.11e-05	0.104275	0.0637745	0.270901	0.122353	0.392605	0.207647	0.0641956	-0.0974388	0.219727	-0.0368919	-0.000976563	0.0641956	0.0478516	-0.000976563	-0.0705433	-0.000976563	0.122353	-0.000976563	-0.000976563	-0.00486946	0.149375	0.0641956
All_TUBULIN_Mean_Nucl_Integr_Intens_MultiWaveScoring_cyto	na	0.0220299	0.405966	0.623482	0.690002	0.469906	-0.081356	-0.146542	-0.00911522	-0.0239944	0.491537	0.46833	0.0647545	-0.0249634	-0.081356	-0.0249634	0.000359983	0.0814896	0.0357265	-0.0828188	-0.305237	-0.227718	-0.0757656	0.535473	0.459208	0.168468	0.211969	-0.00800323	-0.0757656	-0.00800323	-0.0213223	0.124458	-0.0757656	0.0220299	-0.275826	0.117249	-0.0712357	-0.0249634	0.0704918	0.0751343	-0.00115967	-0.0105553	-0.0249634	-0.0757656	-0.0249634	0.219788	0.320126	-0.0757656	-0.081356
All_TUBULIN_Mean_Stain_Aver_Intens_MultiWaveScoring_cyto	na	0.172043	0.0435602	0.0843716	0.746155	-0.0851288	-0.0851288	-0.142258	0.175178	0.248434	0.0846447	0.199728	-0.0811005	-0.0161743	-0.0851288	-6.1e-05	0.0348944	0.479011	0.105509	0.0466956	-0.252014	-0.531418	0.175178	0.127642	0.0521994	0.0051092	-0.0373834	0.334982	0.0950308	0.378073	0.170031	0.38796	0.170031	0.172043	-0.24526	-6.1e-05	-0.0252895	-6.1e-05	0.103439	0.0894165	-6.1e-05	-0.142258	-6.1e-05	0.156979	-6.1e-05	-6.1e-05	-0.142258	0.170031	-0.0851288
Area_IMA_Summary_EdU	na	-0.0429611	0.541841	0.55838	0.398823	0.586418	0.608025	0.598381	-0.0727386	-0.10379	0.122299	0.112579	0.0107346	0.0954781	0.0153732	-0.0769234	-0.209718	0.109161	-0.204819	-0.489187	-0.484638	-0.626701	-0.123154	0.141943	0.558208	0.49906	0.576868	-0.0908508	-0.204819	-0.223419	-0.204819	-0.0908508	-0.205063	0.0373459	-0.10379	-0.353046	-0.0908508	0.0312691	-0.0429611	-0.274677	0.215473	0.0107346	-0.353046	-0.123154	-0.315693	0.368671	0.486565	-0.0535736	-0.0135422
Area_IMA_Summary_cyto	na	-0.0559139	0.515305	0.677108	0.433189	0.558233	-0.0882626	-0.122076	-0.0894012	-0.0687504	0.0947723	0.0448246	0.0710506	0.0962753	-0.0856991	-0.0970078	-0.0129476	-0.143091	-0.0740204	-0.205822	-0.446251	-0.276251	-0.104904	0.384388	0.441799	0.586364	0.515497	-0.241236	-0.104904	-0.241236	-0.104904	-0.152491	-0.260422	-0.00281334	-0.205347	-0.155235	-0.0949955	0.022789	0.0278378	0.022789	0.149498	0.0710506	-0.14315	-0.167038	-0.24044	0.43795	0.535772	-0.104904	-0.122076
Average_intensity_IMA_Summary_EdU	na	0	-0.240574	-0.228092	-0.01614	0	0.25	0	0.0235329	0.0205727	0.862644	0.536198	0.25	0.0520287	0	-0.000514984	0.0156745	-0.0213051	0.141453	0.149433	0.687527	0.375	-0.0467262	0.477789	-0.0574095	0.35231	0.00368111	-0.0532875	0.0315895	-0.0501137	-0.0467262	-0.0532875	0.0315895	0	-0.0501137	0.594753	0.0205727	-0.000514984	0	-0.000514984	-0.000514984	0	0.12466	0.0315895	0.121975	-0.000514984	0	0.0235329	0
Average_intensity_IMA_Summary_cyto	na	0.184177	-0.151491	-0.215092	-0.0787163	-0.278904	-0.14658	-0.141209	0.110109	0.109501	0.434125	0.356571	0.113621	-0.0787163	-0.098362	-0.0250053	0.0224536	0.123905	0.200563	0.212653	0.593365	0.379734	0.110109	0.250213	-0.212842	-0.0531107	-0.07283	0.126347	0.0717793	0.109501	0.0588398	0.0754433	0.200563	0.144016	0.0291786	0.376568	-0.0557899	-0.0250053	-0.098362	-0.0787163	-0.0787163	-0.141209	-0.0025444	0.283693	-0.0025444	-0.0250053	-0.141209	0.110109	0.144016
Binucleated_Cells_Micronuclei_EdU	na	0.161146	-0.00444794	-0.0380854	-0.172329	-0.355784	-0.379099	-0.358143	-0.00444794	-0.0380854	-0.00444794	-0.00429246	-0.358143	-0.290859	0.11954	0.153408	-0.276623	-0.0380854	-0.00444794	-0.369796	-0.679897	-0.731765	-0.00444794	-0.00281857	0.366218	-0.365205	-0.333116	-0.00429246	-0.00444794	0.215843	-0.00444794	-0.00429246	-0.00444794	0.0297733	-0.0380854	-0.679897	-0.0380854	-0.0475731	0.0705821	0.0710106	-0.0962791	-0.273738	-0.532558	-0.00444794	-0.679897	-0.378506	-0.35174	-0.00444794	0.209583
Binucleated_Cells_Micronuclei_cyto	na	-0.128925	0.128076	0.076189	0.142225	0.22646	0.127094	0.112568	-0.111409	-0.0318775	-0.111409	-0.00782967	0.165546	0.321791	0.13686	0.125013	-0.138712	-0.0318775	-0.0466113	-0.309794	-0.66493	-0.260517	-0.111409	-0.0165227	0.386547	0.289305	-0.186034	-0.0318775	-0.0286885	-0.0318775	-0.0286885	-0.0318775	-0.111409	-0.342793	-0.0318775	-0.66493	-0.0318775	0.208021	0.137714	0.245741	0.153456	0.0791206	0.0360241	-0.111409	-0.0548229	-0.140028	-0.222309	-0.111409	0.251728
Breadth_IMA_Summary_EdU	na	0.0125122	0.652668	0.812992	0.227373	0.575989	0.955872	0.955872	-0.015583	-0.0688515	0.17757	0.069828	0.0540161	0.16939	0.0022583	-0.0249805	-0.418391	-0.0222206	-0.0998116	-0.264804	-0.376909	-0.216614	-0.015583	0.104657	0.734745	0.406253	0.559307	-0.0688515	-0.0998116	-0.080204	-0.0420723	-0.0688515	-0.0998116	0.0125122	-0.0688515	-0.225664	-0.0688515	-0.0249805	-0.046936	-0.128618	0.227373	-0.00897217	-0.244829	-0.0420723	-0.128618	-0.0249805	0.0125122	-0.0203438	0.0022583
Breadth_IMA_Summary_cyto	na	-0.00764847	0.701485	0.868708	0.308041	0.526325	-0.091877	-0.107258	-0.0853958	-0.0627995	0.0663528	0.0638981	0.0489082	0.0696373	-0.091877	-0.0671959	-0.138745	-0.123835	-0.076973	-0.12251	-0.433163	-0.140461	-0.0853958	0.40119	0.543902	0.92697	0.524295	-0.121027	-0.0853958	-0.210505	-0.125069	-0.121027	-0.125069	0.00789261	-0.1784	-0.0671959	-0.221125	0.00579453	0.0127754	0.00420761	0.244686	0.0127754	-0.0671959	-0.076973	-0.145565	0.244686	0.296955	-0.076973	-0.107258
Cells_with_one_micronucleus_Micronuclei_EdU	na	0.00841141	-0.00346021	-0.00348751	0.364357	0.14867	-0.0547981	0.0231819	-0.00346021	-0.00348751	0.0365484	-0.00348751	0.0809212	0.139503	-0.0547981	-0.0105972	-0.0514803	-0.00348751	-0.00346021	0.0613383	-0.0613785	-0.0547981	-0.00346021	-0.00230829	0	-0.103715	0.29097	-0.00348751	-0.00346021	-0.00348751	-0.00346021	-0.00348751	-0.00346021	-0.00706863	-0.00348751	-0.0613785	-0.00348751	-0.0105972	-0.0547981	0.0496597	-0.0613785	-0.0547981	-0.0613785	-0.00346021	-0.0613785	-0.0613785	-0.0547981	-0.00346021	0.00621414
Cellular_Gradient_Index_Transfluor_EdU	na	0.382521	-0.535086	-0.458942	-0.779415	-0.544874	-0.543409	-0.471632	0.352957	0.325886	-0.444387	-0.441364	-0.481642	-0.779415	0.376037	0.51379	-0.436003	0.242756	0.373953	-0.518516	-0.779415	-0.544874	0.366873	-0.332204	-0.480561	-0.436003	-0.619241	0.39864	0.402273	0.229694	0.293997	0.408894	0.366873	0.368849	-0.357502	-0.232052	-0.398884	-0.779415	-0.543409	0.525075	-0.232052	-0.543409	-0.779415	0.432058	-0.572262	-0.779415	-0.544874	0.352957	-0.376539
Cellular_Gradient_Index_Transfluor_cyto	na	0.058569	0.198584	0.219912	0.380249	-0.0304928	0.0669918	0.0669918	0.256672	0.257998	0.159644	0.200869	0.0669918	-0.161499	0.0669918	0.0443115	4.67e-07	0.241396	0.216415	0.0181279	-0.161499	-0.108496	0.265986	-0.0787453	0.332894	4.67e-07	-0.0294281	0.430849	0.115251	0.338076	-0.138903	0.384218	0.216783	0.058569	-0.071352	0.0443115	0.0741596	-0.161499	0.0669918	0.159546	-0.0618896	-0.108496	0.0032959	0.216415	0.0443115	0.0443115	0.0669918	0.198584	0.0669918
Cellular_Laplacian_Index_Transfluor_EdU	na	0.445107	-0.531982	-0.458323	-0.735836	-0.543251	-0.541786	-0.472572	0.344604	0.325754	-0.441528	-0.439768	-0.480019	-0.735836	0.374414	0.51318	-0.412685	0.24299	0.381592	-0.521505	-0.735836	-0.543251	0.357788	-0.368528	-0.480874	-0.412685	-0.620277	0.399729	0.39624	0.229807	0.285522	0.409494	0.357788	0.361366	-0.356638	-0.196285	-0.397532	-0.735836	-0.541786	0.524465	-0.196285	-0.495277	-0.735836	0.423584	-0.530636	-0.735836	-0.543251	0.423584	-0.289711
Cellular_Texture_Index_Transfluor_EdU	na	0.387205	-0.637594	-0.741339	-0.259632	-0.79199	-0.542967	-0.472654	0.362692	0.498419	-0.490622	-0.432257	-0.542967	-0.259632	0.355955	0.673695	-0.110329	0.289557	0.405539	-0.477802	-0.259632	-0.79199	0.429098	-0.282581	-0.727521	-0.110329	-0.868881	0.43067	0.351461	0.227789	0.402243	0.430548	0.436422	0.387205	-0.432257	-0.259632	-0.493048	-0.259632	-0.542967	0.527861	-0.259632	-0.542967	-0.259632	0.436422	-0.259632	-0.259632	-0.79199	0.347311	-0.284788
DNA_Mean_Area_Micronuclei_EdU	na	0.000976563	0.648163	0.488209	0.0953865	0.000976563	0.000976563	0.000976563	0.217499	0.189381	0.117645	0.189381	-0.219727	-0.277271	0.000976563	0.00993729	-0.598098	0.189381	0.0490417	-0.626646	-0.563648	-0.219727	0.144989	0.316148	0.646171	0.440313	0.592745	0.189381	0.117645	0.0121346	0.217499	0.0990486	0.144989	0.000976563	-0.627857	-0.469166	-0.189381	0.0140877	0.000976563	-0.0573006	0.167164	-0.219727	-0.563648	0.217499	-0.427418	0.0140877	0.000976563	0.217499	0.000976563
DNA_Mean_Area_Micronuclei_cyto	na	-0.0279922	0.531207	0.541548	0.556953	0.455605	-0.117714	-0.11454	0.116209	0.029707	-0.0123272	-0.0120068	-0.11454	-0.0340042	-0.11454	-0.0618362	-0.122257	0.0786571	0.0162334	-0.501614	-0.470528	-0.321449	0.104124	0.31924	0.702659	0.663552	0.542873	-0.0120068	0.116209	0.029707	0.0162334	-0.0120068	0.0445538	-0.00907135	-0.509199	-0.214668	-0.117476	0.212227	0.207314	-0.0340042	0.012764	-0.310463	-0.214668	-0.0533428	-0.275703	0.0227737	0.0248184	-0.0191631	-0.11454
DNA_Total_Area_Micronuclei_EdU	na	0.205093	-0.0366993	-0.0601976	-0.16437	-0.170412	-0.309352	-0.132728	0.204546	0.255694	-0.313066	-0.336515	-0.346025	-0.188206	0.215632	0.143169	-0.268035	0.166785	0.297808	-0.365486	-0.426073	-0.386619	0.204546	-0.0788113	-0.189762	-0.45124	-0.379165	0.255694	0.274248	0.255694	0.235552	0.255694	0.204058	0.0628751	-0.35312	-0.347336	-0.159064	-0.0936285	-0.0667354	0.159836	-0.0929239	-0.180277	-0.299603	0.297808	-0.378341	-0.339186	-0.264775	0.235552	0.239407
DNA_Total_Area_Micronuclei_cyto	na	0.140836	-0.0684223	0.0544968	-0.0970257	-0.0967493	0.232319	0.138906	0.264467	0.26812	-0.0751362	-0.104668	-0.212926	-0.163018	0.250119	0.248374	-0.216374	0.203545	0.198183	-0.118191	-0.314703	-0.414151	0.289858	0.0502184	-0.135853	-0.366129	-0.232341	0.257988	0.249697	0.372124	0.317202	0.24749	0.342348	0.11504	-0.235405	-0.394452	0.138969	0.0851384	0.123588	0.0907144	-0.11213	-0.104102	-0.124262	0.264467	-0.0862413	-0.13281	-0.202387	0.236025	0.298005
DualMono_cell_ratio_Micronuclei_EdU	na	0.213728	-0.00626564	-0.0161705	-0.304552	-0.471174	-0.242414	-0.471907	0.0166416	-0.0161705	-0.0275059	0.030941	-0.453596	-0.39525	-0.0298901	0.0124378	-0.401784	-0.0161705	-0.00528908	-0.438095	-0.742052	-0.432112	0.0166416	-0.00408795	0.371434	-0.0220402	-0.0157321	0.030941	-0.0275059	0.135189	-0.0275059	0.030941	0.0326328	0.029768	-0.0161705	-0.285265	-0.0161705	-0.0208607	0.0347729	0.0411243	-0.145617	-0.484968	-0.423204	-0.0275059	-0.742052	-0.185045	-0.480207	-0.0275059	0.133772
DualMono_cell_ratio_Micronuclei_cyto	na	-0.0607815	0.0954136	0.171629	0.0583019	0.0578518	0.0710354	0.0776272	-0.00285721	-0.00658989	-0.00285721	0.00561333	-0.233511	0.0209484	0.156851	0.123854	-0.014235	-0.00658989	0.00993729	-0.494606	-0.658155	-0.114981	0.00993729	0.0710128	0.27059	0.126191	0.242792	-0.00658989	0.00993729	0.0252666	-0.00285721	0.0252666	-0.00285721	-0.0295315	-0.00658989	-0.461378	-0.00658989	0.0583019	0.0869045	-0.00691032	-0.0241222	-0.192129	-0.0241222	-0.00285721	-0.0241222	-0.152296	-0.177725	-0.00285721	0.135733
Ell_form_factor_IMA_Summary_EdU	na	9.54e-05	0.0656891	0.000461578	0.000518799	9.54e-05	-0.24033	-0.133396	0.0232086	0.000461578	0.0232086	0.000461578	-0.133396	-0.228058	9.54e-05	0.000518799	0.262977	0.000461578	0.0232086	-0.0113363	-0.228058	-0.612888	0.0232086	0.240711	0.209388	-0.001084	0.000350018	0.000461578	0.0232086	0.000461578	0.0232086	0.000461578	0.000747681	9.54e-05	0.000461578	-0.0517883	0.255833	0.252472	0.252537	0.000518799	-0.228058	0.0163307	0.000518799	0.0232086	-0.228058	0.8638	0.252537	0.000747681	9.54e-05
Ell_form_factor_IMA_Summary_cyto	na	-3.81e-06	0.0672932	0.105492	0	-3.81e-06	-3.81e-06	-3.81e-06	-0.119051	0.00881195	-0.00308418	0.0405502	-3.81e-06	0	-3.81e-06	0	0.0632287	-0.00832367	0.0321369	-0.122427	-0.25	-0.336185	0.0672932	-0.133217	0.0954512	-0.244451	-0.225524	0.00881195	0.129183	0.00881195	0.0282307	0.0405502	0.129183	-3.81e-06	-0.0768051	0	0.550804	0	0.139164	0	-0.25	0.0615273	0	-0.0310383	0	0.25	0.482059	-0.0526447	-3.81e-06
Equiv_oblate_vol_IMA_Summary_EdU	na	0.00160599	0.442875	0.482506	0.485113	0.596821	0.719379	0.658833	-0.10923	-0.12484	0.232155	0.23568	0.0158882	0.17127	0.00160599	-0.0482235	-0.530961	0.0581894	-0.188576	-0.458588	-0.505621	-0.57143	-0.0450211	0.210624	0.530732	0.537065	0.567614	-0.113121	-0.10923	-0.242027	-0.10923	-0.132652	-0.188576	0.00160599	-0.12484	-0.37464	-0.167809	-0.0482235	0.00160599	-0.314215	0.28443	0.00160599	-0.328741	-0.10923	-0.328741	0.282843	0.246235	-0.0600357	0.00160599
Equiv_oblate_vol_IMA_Summary_cyto	na	-0.0537357	0.446869	0.559645	0.479996	0.540674	-0.0537357	-0.191187	-0.0509682	-0.0929699	0.10236	0.189161	0.147242	0.0810699	-0.191187	-0.121597	-0.0461754	-0.0929699	-0.0470619	-0.250274	-0.459	-0.214746	-0.0664711	0.402425	0.522091	0.566788	0.525246	-0.0821056	-0.0470619	-0.135084	-0.0509682	-0.0821056	-0.199039	-0.0537357	-0.268385	-0.121597	-0.135084	0.0127106	0.0317631	0.0229645	0.284683	0.0412846	-0.166519	-0.199039	-0.26564	0.484879	0.406519	-0.0664711	-0.191187
Equiv_prolate_vol_IMA_Summary_EdU	na	-0.0266113	0.528372	0.441578	0.509964	0.365967	0.614258	0.587891	-0.06464	-0.105396	0.254215	0.270924	0.0449219	0.0674591	-0.0266113	-0.0680695	-0.246749	0.0735359	-0.106266	-0.511007	-0.50386	-0.401367	-0.106266	0.206139	0.545053	0.607763	0.552162	-0.0963631	-0.179142	-0.217213	-0.106266	-0.0963631	-0.174503	0.00756836	-0.105396	-0.383987	0.11858	0.0314484	0.00756836	-0.207962	0.196243	0.00756836	-0.425369	-0.106266	-0.3741	0.509964	0.345703	-0.0542641	-0.00146484
Equiv_prolate_vol_IMA_Summary_cyto	na	-0.0115814	0.428773	0.592979	0.479	0.554916	-0.112656	-0.112656	-0.130217	-0.0287704	0.126799	0.112267	0.083847	0.0523643	-0.112656	-0.0740929	0.00322895	-0.0901718	-0.00826836	-0.228554	-0.504513	-0.214218	-0.130217	0.374209	0.531222	0.567403	0.508688	-0.0774765	-0.0661297	-0.157433	-0.130217	-0.0774765	-0.130217	-0.0115814	-0.312706	-0.0740929	-0.0287704	0.0189171	0.083847	0.0189171	0.117062	0.0506439	-0.0740929	-0.130217	-0.227413	0.47485	0.522812	-0.130217	-0.120712
Equiv_radius_IMA_Summary_EdU	na	-0.00692177	0.703888	0.847652	0.291203	0.570032	0.570032	0.947474	-0.0520325	-0.0266075	0.0891418	0.032711	0.00362587	0.109074	0.00362587	0.0153236	-0.280088	0.0371056	-0.0611877	-0.266511	-0.474796	-0.544641	-0.0611877	0.0961668	0.609184	0.361108	0.607052	-0.0162315	-0.0611877	-0.141109	-0.0520325	-0.0162315	-0.101593	0.00362587	-0.0266075	-0.204533	0.0371056	0.0153236	0.00362587	-0.180363	0.202824	0.00362587	-0.204533	-0.0520325	-0.259953	0.202824	0.270105	-0.0520325	0.00362587
Equiv_radius_IMA_Summary_cyto	na	-0.0345573	0.574188	0.868246	0.379356	0.554821	-0.0377312	-0.166393	-0.0493126	-0.136801	0.0739708	0.0638027	0.0448112	0.107384	-0.166393	-0.0484238	-0.0111015	-0.149374	-0.0301476	-0.107564	-0.483849	-0.293835	-0.0541954	0.450233	0.531379	0.651099	0.458568	-0.136801	-0.0541954	-0.149374	-0.196041	-0.136801	-0.196041	-0.0377312	-0.173788	-0.0832138	-0.136801	0.0136337	0.0238152	0.0136337	0.107384	0.0238152	-0.0484238	-0.109493	-0.149254	0.383507	0.437145	-0.109493	-0.166393
Equiv_sphere_surface_area_IMA_Summary_EdU	na	-0.0429611	0.541841	0.55838	0.398823	0.586418	0.608025	0.598381	-0.0727386	-0.10379	0.122299	0.112579	0.0107346	0.0954781	0.0153732	-0.0769234	-0.209718	0.109161	-0.204819	-0.489187	-0.484638	-0.626701	-0.123154	0.141943	0.558208	0.49906	0.576868	-0.0908508	-0.204819	-0.223419	-0.204819	-0.0908508	-0.205063	0.0373459	-0.10379	-0.353046	-0.0908508	0.0312691	-0.0429611	-0.274677	0.215473	0.0107346	-0.353046	-0.123154	-0.315693	0.368671	0.486565	-0.0535736	-0.0135422
Equiv_sphere_surface_area_IMA_Summary_cyto	na	-0.0559139	0.515305	0.677108	0.433189	0.558233	-0.0882626	-0.122076	-0.0894012	-0.0687504	0.0947723	0.0448246	0.0710506	0.0962753	-0.0856991	-0.0970078	-0.0129476	-0.143091	-0.0740204	-0.205822	-0.446251	-0.276251	-0.104904	0.384388	0.441799	0.586364	0.515497	-0.241236	-0.104904	-0.241236	-0.104904	-0.152491	-0.260422	-0.00281334	-0.205347	-0.155235	-0.0949955	0.022789	0.0278378	0.022789	0.149498	0.0710506	-0.14315	-0.167038	-0.24044	0.43795	0.535772	-0.104904	-0.122076
Equiv_sphere_vol_IMA_Summary_EdU	na	-0.0300446	0.436562	0.44978	0.436342	0.678482	0.638931	0.688248	-0.125134	-0.110994	0.203869	0.184237	0.0190582	0.140078	0.00856018	-0.132387	-0.377038	0.132235	-0.201061	-0.546064	-0.486391	-0.659927	-0.125134	0.141256	0.537661	0.527289	0.551156	-0.105989	-0.147472	-0.191072	-0.147472	-0.214754	-0.182507	0.0190582	-0.110994	-0.374575	-0.147249	0.0148334	-0.00367737	-0.215761	0.248476	0.00856018	-0.41205	-0.125134	-0.369936	0.390444	0.556412	-0.134045	-0.00367737
Equiv_sphere_vol_IMA_Summary_cyto	na	-0.0425301	0.440958	0.669742	0.491631	0.550831	-0.104542	-0.183033	-0.124159	-0.147322	0.131849	0.10948	0.1469	0.145195	-0.183033	-0.179131	-0.0482474	-0.153669	-0.0162487	-0.227135	-0.463799	-0.238819	-0.124159	0.328918	0.521323	0.565721	0.454953	-0.145002	-0.124159	-0.24571	-0.153334	-0.180891	-0.124159	-0.0573006	-0.207258	-0.179131	-0.147322	0.0136032	0.0392342	0.0136032	0.192314	0.0392342	-0.0958786	-0.124159	-0.252861	0.456474	0.519215	-0.124159	-0.183887
Gradient_Index_Transfluor_EdU	na	0.415094	-0.741169	-0.68022	-0.728458	-0.714899	-0.463678	-0.417292	0.289509	0.281538	-0.48531	-0.44145	-0.500544	-0.728458	0.324654	0.43256	-0.424334	0.22331	0.358112	-0.399938	-0.728458	-0.714899	0.322346	-0.390652	-0.718386	-0.729711	-0.725148	0.320234	0.325397	0.150068	0.282063	0.34831	0.31905	0.228083	-0.348433	-0.728458	-0.44145	-0.728458	-0.4107	0.548879	-0.275822	-0.400934	-0.728458	0.287067	-0.728458	-0.728458	-0.714899	0.357746	-0.255915
Gradient_Index_Transfluor_cyto	na	0.218798	0.0869259	0.136557	0.751068	-0.0394764	0.0796375	-0.0394764	0.299426	0.328207	0.0762642	0.119833	0.0796375	-0.141693	0.0796375	0.0557556	0.163073	0.220175	0.284965	0.141482	-0.141693	-0.49663	0.297649	0.1096	0.0821071	-0.0270513	-0.0656934	0.4056	0.132147	0.344442	0.18806	0.328329	0.316583	0.0867176	-0.216513	0.0557556	0.0858974	-0.141693	0.0796375	0.362885	-0.00497436	-0.106493	0.00692749	0.219738	0.0557556	0.0557556	-0.0529041	0.203531	0.0796375
Inner_radius_IMA_Summary_EdU	na	-0.0210228	0.684095	0.65372	0.280285	0.60635	0.572292	0.935574	-0.160658	-0.220289	0.0439587	0.0327892	0.012722	0.280285	-0.00124741	-0.0578728	-0.294847	-0.0694103	-0.170301	-0.141061	-0.389172	-0.154324	-0.170301	0.081055	0.461847	0.339769	0.597011	-0.0823498	-0.211195	-0.220289	-0.160658	-0.135695	-0.211195	0.012722	0.0274181	-0.197033	-0.220289	-0.0578728	-0.252956	-0.197033	0.280285	-0.00124741	-0.277477	-0.160658	-0.0680046	0.0293083	0.152615	-0.0846081	-0.154324
Inner_radius_IMA_Summary_cyto	na	-0.0507393	0.545373	0.851379	0.211386	0.55965	-0.0656319	-0.201862	-0.116852	-0.131165	0.0300598	0.0525513	0.0319405	0.19161	-0.20113	-0.0830898	-0.178136	-0.101135	-0.0823059	-0.0739863	-0.28182	-0.233845	-0.182648	0.358369	0.495257	0.65707	0.392415	-0.131165	-0.116852	-0.337708	-0.279694	-0.131165	-0.279694	-0.0447578	-0.0383911	-0.0830898	-0.337708	-0.0360928	-0.0656319	-0.0360928	0.262411	0.0672188	-0.0841885	-0.0823059	-0.161337	0.211386	0.380817	-0.116852	-0.110676
Interphase_Cells_Micronuclei_EdU	na	0.0813236	-0.0636463	-0.0229579	-0.032486	-0.129786	-0.366236	-0.273951	-0.0636463	-0.0713341	0.143724	-0.0713341	-0.322046	-0.0980377	0.172022	0.110733	-0.248848	-0.0214567	-0.0133533	-0.331368	-0.722672	-0.432032	-0.0636463	-0.00769369	0.294111	-0.45158	-0.434816	-0.0229579	-0.0636463	0.316953	-0.00993538	-0.0713341	-0.0636463	0.0388432	-0.0713341	-0.722672	-0.0713341	-0.0492096	0.0569096	0.0710602	-0.137589	-0.101831	-0.496841	-0.0636463	-0.722672	-0.329849	-0.304956	-0.0636463	0.232569
Interphase_Cells_Micronuclei_cyto	na	-0.126347	-0.107256	-0.0520878	0.296259	0.221806	0.160038	0.0994911	-0.282103	-0.141565	-0.0573788	0.216394	0.178226	0.424799	0.0661659	0.144403	-0.219227	-0.141565	-0.107164	-0.166466	-0.709345	-0.188725	-0.0417844	-0.075295	0.180772	0.232899	-0.22358	-0.0673466	-0.0603506	-0.141565	-0.0906202	-0.0400028	-0.0603199	-0.179569	-0.0286503	-0.57165	-0.141565	0.0900822	0.191288	0.222284	0.209223	0.160648	0.0582218	-0.282103	-0.0314884	0.108515	0.293705	-0.110167	0.311893
Laplacian_Index_Transfluor_EdU	na	0.414988	-0.740738	-0.681042	-0.699303	-0.715525	-0.464304	-0.419504	0.287857	0.282848	-0.484879	-0.441784	-0.501169	-0.699303	0.282636	0.452232	-0.424289	0.228527	0.356827	-0.399348	-0.699303	-0.715525	0.386612	-0.387502	-0.718744	-0.729946	-0.724488	0.391491	0.32399	0.149426	0.280655	0.35133	0.318008	0.245066	-0.34193	-0.699303	-0.441784	-0.699303	-0.411814	0.552927	-0.236412	-0.401804	-0.699303	0.285294	-0.699303	-0.699303	-0.715525	0.420792	-0.260935
Laplacian_Index_Transfluor_cyto	na	0.151031	0.116234	0.115438	0.698013	-0.0437317	0.0759583	0.0339661	0.297852	0.326376	0.0996903	0.121664	0.0759583	-0.0778961	0.0759583	0.111099	0.153789	0.275473	0.282166	0.162262	-0.0778961	-0.490509	0.298649	0.114037	0.0782231	-0.0282311	-0.0639079	0.404135	0.131676	0.343344	0.185995	0.369711	0.318563	0.0947571	-0.21456	0.111099	0.085165	-0.0778961	0.0759583	0.454605	-0.0778961	-0.0954895	-0.0778961	0.274384	0.111099	0.032486	-0.0954895	0.201957	0.0759583
Length_IMA_Summary_EdU	na	-0.0201797	0.711521	0.846155	0.345703	0.356361	0.356361	0.613197	-0.0372047	-0.0174198	0.114353	0.2026	-0.000404358	-0.0184326	-0.000404358	-0.0184326	-0.110652	0.0380497	-0.0372047	-0.46307	-0.536621	-0.614174	-0.042942	0.203695	0.61296	0.195996	0.47995	-0.0174198	-0.0372047	-0.06991	-0.0372047	0.0380497	-0.042942	0.011879	-0.0280399	-0.205444	0.0380497	0.0311279	0.0546036	-0.0184326	0.0843506	0.011879	-0.205444	-0.0372047	-0.366577	0.498779	0.356361	-0.0372047	0.011879
Length_IMA_Summary_cyto	na	-0.0226326	0.516706	0.621895	0.281637	0.566456	-0.138844	-0.138844	-0.13076	-0.101387	0.076683	0.0576859	0.0636482	0.0106411	-0.138844	-0.000509262	0.0202708	-0.0872269	0.0202866	-0.157493	-0.36965	-0.320972	-0.0583725	0.293242	0.521012	0.736056	0.396751	-0.101387	-0.0237045	-0.112862	-0.13076	-0.101387	-0.12429	-0.0238533	-0.240791	-0.0216274	0.0130081	0.0106411	0.0636482	0.0106411	0.0106411	0.0636482	-0.0216274	-0.12429	-0.157614	0.603415	0.566456	-0.13076	-0.138844
Mean_radius_IMA_Summary_EdU	na	-0.023798	0.706156	0.845066	0.339661	0.597284	0.597284	0.951288	-0.0229282	-0.106297	0.161234	0.0560036	0.00939369	0.0723267	0.00939369	-0.0213013	-0.23411	0.0560036	-0.100809	-0.343763	-0.507996	-0.583735	-0.0229282	0.148738	0.617581	0.428307	0.63293	-0.0468483	-0.186625	-0.106297	-0.100809	-0.106297	-0.100809	0.00939369	-0.0186501	-0.231506	-0.0468483	0.00384521	-0.00097084	-0.149963	0.252014	0.00939369	-0.319153	-0.100809	-0.319153	0.252014	0.307611	-0.0308628	-0.00097084
Mean_radius_IMA_Summary_cyto	na	-0.0274563	0.522469	0.867037	0.301884	0.563345	-0.0745754	-0.151114	-0.185759	-0.139132	0.0924969	0.0708942	0.0551662	0.0372353	-0.151114	-0.101688	-0.000993378	-0.139132	-0.0216961	-0.160786	-0.479374	-0.254385	-0.0917644	0.447885	0.531402	0.662824	0.47653	-0.126802	-0.0411053	-0.139132	-0.173674	-0.126802	-0.173674	-0.0292873	-0.24399	-0.101688	-0.126802	-0.00696182	0.0281887	-0.00696182	0.0565224	0.0281887	-0.124149	-0.173674	-0.124149	0.376591	0.524527	-0.173674	-0.164907
Mitotic_Cells_Micronuclei_EdU	na	0.100128	-0.267855	-0.119428	-0.231117	-0.333771	0.210114	-0.446808	0.168734	0.187075	-0.397493	-0.32819	0.276764	-0.083599	0.087677	-0.0378882	0.0725643	0.15031	0.216219	0.180886	-0.302196	0.24942	0.0632648	-0.114055	-0.381367	-0.237917	-0.402176	0.226536	0.250765	0.21422	0.168734	0.191181	0.109163	0.127106	-0.154937	-0.231117	0.191181	-0.109059	-0.139191	0.134212	-0.0764605	-0.0378723	-0.0499593	0.192171	-0.389941	-0.223887	-0.0193176	0.20389	-0.143097
Mitotic_Cells_Micronuclei_cyto	na	0.125143	-0.193571	-0.0997791	-0.321845	-0.208292	0.193158	-0.144169	0.246788	0.321703	-0.104815	-0.0558338	-0.188746	-0.19084	0.14328	0.193536	-0.0685683	0.159594	0.221604	0.252979	-0.18937	-0.228513	0.218571	0.0690858	-0.288763	-0.457753	-0.289344	0.296801	0.300128	0.330492	0.306255	0.274584	0.300128	0.135376	-0.136278	0.220313	0.205004	-0.0628991	-0.0750511	-0.161735	-0.116759	-0.112827	0.106159	0.308951	0.0711099	-0.114799	-0.188807	0.246788	0.349898
Mononucleated_Cells_Micronuclei_EdU	na	-0.057375	-0.0532913	-0.0151421	-0.00967026	0.123293	-0.39551	-0.08008	-0.131905	-0.114131	0.135201	-0.0196458	-0.166994	0.0835228	0.085207	0.136135	-0.0489714	0.079848	-0.0532913	-0.280482	-0.721096	-0.432619	-0.131905	-0.0595441	0.321813	-0.408486	-0.351318	-0.043451	-0.131905	0.262109	0.135201	-0.114131	-0.131905	-0.083498	-0.043451	-0.721096	-0.114131	-0.0365257	-0.0306416	0.0517845	-0.0876732	-0.0863056	-0.455593	-0.0532913	-0.58572	-0.22366	-0.128786	-0.021553	0.0427265
Mononucleated_Cells_Micronuclei_cyto	na	-0.124323	-0.339366	-0.0222893	0.163218	0.155207	0.124567	0.173395	-0.155174	-0.0867424	-0.1242	0.223339	0.248468	0.378305	0.0588932	0.124521	-0.220816	-0.0507317	-0.0784588	0.0277609	-0.717661	-0.148127	-0.0189919	-0.0971497	0.0911367	0.254472	-0.272808	-0.0507317	-0.130358	-0.0867424	0.0571352	-0.0507317	-0.0820127	-0.138605	-0.0105705	-0.447763	-0.169628	0.0764256	0.223566	0.229597	0.235971	0.308147	0.103159	-0.223833	0.0247898	0.185801	0.149469	-0.0957995	0.301447
MultiDualMono_cell_ratio_Micronuclei_EdU	na	0.184259	-0.00428772	-0.0173855	-0.350056	-0.452692	-0.287653	-0.394953	0.013443	-0.0173855	-0.0341949	0.0306911	-0.447321	-0.391071	-0.0717106	0.0431709	-0.363826	-0.0173855	-0.00746155	-0.511925	-0.720661	-0.41363	0.013443	-0.00408515	0.367414	-0.0495817	-0.0509525	0.168997	-0.0341949	0.132254	-0.0341949	0.0306911	0.0333405	0.0293522	-0.0173855	-0.206989	-0.0173855	-0.0777168	0.0369205	0.0603828	-0.134846	-0.468073	-0.39986	-0.0341949	-0.720661	-0.22823	-0.465021	-0.0341949	0.183771
MultiDualMono_cell_ratio_Micronuclei_cyto	na	-0.0647449	0.096553	0.1996	0.120312	0.047411	0.0636463	0.0593739	-0.00236893	-0.00526428	-0.00236893	-0.00526428	-0.285082	-0.0758781	0.210497	0.0169182	-0.0350905	-0.00526428	-0.00236893	-0.439818	-0.420849	-0.167162	-0.00236893	0.125681	0.359977	0.0856625	0.254236	-0.00526428	0.0109138	0.0282135	-0.00236893	0.0282135	-0.00236893	-0.0380116	-0.00526428	-0.60603	-0.00526428	0.116772	0.18889	-0.0249748	-0.0758781	-0.213427	-0.0249748	0.0367928	-0.0249748	-0.220898	-0.261889	-0.00236893	0.200365
MultiMono_cell_ratio_Micronuclei_EdU	na	0.145754	-0.00172615	-7.94e-05	-0.203182	-0.741701	-0.286257	-0.389772	-0.00172615	-7.94e-05	-0.00172615	-7.94e-05	-0.320314	-0.203182	0.0692158	0.0545609	-0.327541	-7.94e-05	-0.00172615	-0.675837	-0.521993	-0.741701	-0.00172615	-0.000200973	-2.4e-05	-0.141088	-0.242488	-7.94e-05	-0.00172615	-7.94e-05	-0.00172615	-7.94e-05	-0.00172615	0.123293	-7.94e-05	-0.310351	-7.94e-05	-0.0316136	0.0542011	0.0891503	-0.0569199	-0.506838	-0.521993	-0.00172615	-0.521993	-0.521993	-0.389772	-0.00172615	0.318117
MultiMono_cell_ratio_Micronuclei_cyto	na	-0.072176	-0.00969696	0.0379963	0.12224	-0.0574055	-0.0592365	0.0788898	-0.00969696	-0.00174141	-0.00969696	-0.00174141	-0.173861	-0.0658436	0.159212	0.0470448	-0.126678	-0.00174141	-0.00969696	-0.429298	0.2708	-0.322176	-0.00383759	0.0471688	0.174579	-0.0569928	0.12897	-0.00174141	-0.00383759	-0.00174141	0.0448532	-0.00174141	0.0338669	-0.075716	-0.00174141	-0.240404	-0.00174141	0.266039	0.0593586	0.0171375	-0.0658436	-0.201082	-0.0658436	-0.00969696	-0.0658436	-0.397997	-0.366488	-0.00969696	-0.146395
Multinucleated_Cells_Micronuclei_EdU	na	0.157037	-0.00112152	-0.000549316	-0.230242	-0.587705	-0.387736	-0.288011	-0.00112152	-0.000549316	-0.00112152	-0.000549316	-0.321161	-0.230242	0.108753	0.120134	-0.253306	-0.000549316	-0.00112152	-0.623939	-0.354143	-0.726522	-0.00112152	-0.000433819	0	-0.422457	-0.184326	0.0513306	-0.00112152	-0.000549316	-0.00112152	-0.000549316	-0.00112152	0.148765	-0.000549316	-0.354143	-0.000549316	-0.0725269	0.0897578	0.101336	-0.0550709	-0.587705	-0.354143	-0.00112152	-0.354143	-0.354143	-0.387736	-0.00112152	0.254341
Multinucleated_Cells_Micronuclei_cyto	na	-0.13711	0.0513401	0.185135	0.222942	0.142359	-0.167994	0.156153	-0.0577739	-0.00495911	-0.0577739	-0.00495911	0.310938	0.0924492	0.257105	0.176678	-0.121924	-0.00495911	-0.0577739	-0.355932	-0.332195	-0.345484	-0.00409746	0.0225334	0.198194	-0.0425337	-0.179641	-0.00495911	-0.00409746	-0.00495911	0.271745	-0.00495911	-0.00409746	-0.0926762	-0.00495911	-0.332195	-0.00495911	0.324139	0.197046	0.247845	0.0775566	-0.108789	-0.0163994	-0.00409746	-0.0455742	-0.332195	-0.172632	-0.0577739	-0.283106
Negative_ACTIN_Mean_Cell_Aver_Intens_MultiWaveScoring_cyto	na	0.173593	0.0704517	-0.0243104	-0.0240345	-0.0667301	-0.151963	-0.137257	0.209124	0.15412	0.0189381	0.00954321	-0.320161	-0.122179	-0.185358	0.05089	-0.030067	0.164752	0.0962086	-0.0179372	-0.587755	-0.381926	0.101702	0.00581095	0.0310129	-0.030067	0.0183906	0.0559586	0.101702	0.128354	0.121965	0.11322	0.0962086	0.190811	-0.263955	-0.389757	-0.0986363	0.05089	0.239279	-0.0346546	-0.122179	-0.180456	-0.122179	0.0805836	-0.0574818	-0.0574818	-0.220315	0.138445	0.239279
Negative_ACTIN_Mean_Cyto_Aver_Intens_MultiWaveScoring_cyto	na	0.195236	-0.0832824	-0.0304871	-0.0223885	0.148086	-0.214354	-0.162884	0.267412	0.114838	0.0287174	0.0122986	-0.267295	-0.189381	-0.214354	-0.0223885	0.00883608	0.124481	0.101328	0.0136876	-0.614674	-0.468582	0.156996	0.013737	0.0399374	-0.0841709	-0.0185704	0.0462341	0.0908804	0.0519714	0.12642	0.0462341	0.154361	0.216376	-0.409515	-0.490162	0.0740662	-0.0223885	0.208288	-0.0287361	-0.189381	-0.152589	-0.189381	0.143025	-0.0433846	-0.0172615	-0.138251	0.182976	0.268766
Negative_ACTIN_Mean_Nucl_Aver_Intens_MultiWaveScoring_cyto	na	0.176932	0.0286102	-0.0776564	-0.0228062	-0.0693339	-0.16192	-0.144273	0.221603	0.095089	-0.0209198	0.012828	-0.304873	-0.139261	-0.19605	0.0464878	-0.0374564	0.171743	0.107712	-0.0238666	-0.486063	-0.120559	0.127853	0.030985	0.0624425	-0.0999913	-0.074613	0.0708856	0.052536	0.148674	0.0804901	0.0708856	0.107712	0.196356	-0.247264	-0.387308	-0.0908917	0.0464878	0.24703	-0.0342808	-0.139261	-0.176442	-0.139261	0.0804901	-0.036356	-0.0691929	-0.20907	0.107712	0.24703
Negative_ACTIN_Mean_Nucl_Integr_Intens_MultiWaveScoring_cyto	na	0.116315	0.107939	-0.080719	0.0328121	0.180285	0.0287534	-0.0586553	0.0537395	0.0810852	0.0549603	0.111603	-0.0586553	0.145971	-0.0605548	0.167334	-0.289872	0.133942	0.0525188	-0.129213	-0.526831	-0.326486	0.108793	0.0623121	0.0307921	0.103262	-0.0743423	0.119537	0.104887	0.169708	0.105619	0.0925598	0.171537	0.0699911	-0.183746	-0.3458	0.118317	0.300756	0.116315	-0.0514889	0.0190182	0.0699911	-0.155493	0.186552	-0.213842	-0.223974	-0.300751	0.0807171	0.0699911
Negative_ACTIN_Mean_Stain_Area_MultiWaveScoring_cyto	na	0.119623	0.118549	0.111616	0.107019	0.110468	-0.183588	-0.193842	0.0759869	0.126387	-0.0582867	-0.0845165	-0.181757	-0.190882	-0.0974064	-0.0232792	0.0942714	0.0502148	0.0253277	0.0290775	-0.767908	-0.29394	0.0997906	0.0760048	-0.102752	0.0812274	0.0434469	0.081953	-0.0364361	0.0590038	0.0725689	0.0435009	0.154844	-0.077631	-0.282881	-0.280603	0.0502148	0.185877	0.0379581	-0.0580692	-0.120569	-0.0578556	-0.0304813	0.0389996	0.0174198	-0.0954227	0.129633	-0.162901	0.0169621
Negative_ACTIN_Mean_Stain_Aver_Intens_MultiWaveScoring_cyto	na	0.198809	0.124651	-0.023803	0.00793076	-0.0966358	-0.227861	-0.166826	0.118914	0.158576	-0.0722828	-0.0575346	-0.21419	-0.162594	-0.165728	-0.0246544	-0.045438	0.18425	0.0717945	-0.0236206	-0.845943	-0.272051	0.152483	0.0143457	0.101501	-0.203362	-0.0236206	0.0648875	0.124651	0.0648875	0.117083	0.0906228	0.124651	0.194536	-0.274263	-0.394527	0.066542	0.0632286	-0.185503	-0.11108	-0.162594	-0.155474	-0.121212	0.0633717	-0.0522423	-0.0820274	-0.230791	0.152483	0.174395
Negative_ACTIN_Mean_Stain_Integr_Intens_MultiWaveScoring_cyto	na	0.29189	0.104925	-0.0590356	0.0405064	0.0755294	-0.214929	-0.196792	0.101507	0.168901	-0.076849	-0.0843726	-0.189224	-0.241922	-0.214929	-0.062479	0.0557441	0.115684	0.122747	-0.0131515	-0.795389	-0.37412	0.0886898	-0.0472784	0.102385	-0.00750888	-0.0131515	0.0439927	0.0420589	0.115684	0.125555	0.087804	0.207586	-0.103532	-0.352816	0.31492	0.0706471	0.0912876	-0.16594	-0.0949497	-0.170633	-0.14336	-0.0949497	0.0966244	-0.0580845	-0.0876255	-0.033495	0.203314	-0.145076
Negative_EdU_Mean_Cell_Integr_Intens_MultiWaveScoring_EdU	na	0.0491447	0.477462	0.652938	0.306385	0.570507	0.570507	0.696728	0.0173111	0.0473881	0.22361	0.50271	0.113964	0.0241585	0.665396	0.691639	0.117079	0.495874	0.0439224	-0.480161	-0.315907	-0.390087	0.0173111	0.325228	0.585831	0.580492	0.569656	0.0827885	0.0439224	0.327417	-0.0219498	0.0765629	-0.136208	0.38789	-0.115015	-0.118885	-0.0622807	0.000965118	-0.00788498	0.535389	0.0241585	0.0281487	-0.0483284	0.0439224	-0.154774	0.0478401	0.395824	0.0173111	-0.0446281
Negative_EdU_Mean_Nucl_Integr_Intens_MultiWaveScoring_EdU	na	0.0491447	0.477462	0.652938	0.306385	0.570507	0.570507	0.696728	0.0173111	0.0473881	0.22361	0.50271	0.113964	0.0241585	0.665396	0.691639	0.117079	0.495874	0.0439224	-0.480161	-0.315907	-0.390087	0.0173111	0.325228	0.585831	0.580492	0.569656	0.0827885	0.0439224	0.327417	-0.0219498	0.0765629	-0.136208	0.38789	-0.115015	-0.118885	-0.0622807	0.000965118	-0.00788498	0.535389	0.0241585	0.0281487	-0.0483284	0.0439224	-0.154774	0.0478401	0.395824	0.0173111	-0.0446281
Negative_EdU_Mean_Stain_Area_MultiWaveScoring_EdU	na	0.0249252	0.406878	0.0253811	0.140625	-0.0219955	0.63015	0.823753	0.0437183	0.127188	0.304216	0.0253811	-0.0219955	0	0.745628	0.953125	-1.87e-06	-0.000234604	0.179705	-1.18e-05	0.882812	0.659691	0.134905	0.0163109	-0.000168625	0.0929148	0.091739	0.0253811	0.231462	0.0253811	0.101213	0.0253811	0.134905	2.29e-05	-0.206045	0.210938	-0.206045	0	-0.0219955	0.828125	0	0.0249252	0	0.204485	0.09375	0.375	-0.0219955	0.285051	-0.0219955
Negative_EdU_Mean_Stain_Aver_Intens_MultiWaveScoring_EdU	na	0.0791804	-0.536293	-0.500141	-0.538563	-0.307918	-0.425136	-0.415087	0.315712	0.43227	-0.364662	-0.32436	-0.349493	-0.538563	-0.0779242	0.54015	-0.249652	0.255268	0.378334	-0.338252	-0.538563	-0.489291	0.188393	-0.238061	-0.477593	-0.518939	-0.503291	0.34267	0.318642	0.19582	0.188393	0.435688	0.414711	0.200259	-0.230122	-0.385242	-0.275776	-0.355457	-0.23733	0.569324	-0.356922	-0.415087	-0.385242	0.314125	-0.446278	-0.538563	-0.33108	0.376625	-0.259573
Negative_EdU_Mean_Stain_Integr_Intens_MultiWaveScoring_EdU	na	0.0613785	0.0583153	-0.178713	0	-0.234352	0.0947037	0.60923	0.244106	0.282106	-0.057827	-0.157717	-0.234352	0	0.49721	1	0	0.101442	0.316982	-1.25e-06	0.5625	0.533302	0.161343	-0.0270996	-0.405176	0	-1.25e-06	0.339846	0.337978	0.141115	0.204189	0.405764	0.257778	0.0842056	-0.334841	0	-0.516237	0	-0.234352	0.765625	0	-0.0336685	0	0.383511	0	0	-0.234352	0.351772	-0.234352
Negative_PH3_Mean_Cell_Integr_Intens_MultiWaveScoring_EdU	na	-0.0205879	0.414658	0.618579	0.315977	0.356525	0.573322	0.678791	-0.0687103	-0.151619	0.138046	0.364998	0.0127754	0.044981	-0.0713692	-0.0874615	-0.152145	0.0974197	-0.101913	-0.101218	-0.376158	-0.481525	-0.0687103	0.112247	0.515178	0.346097	0.439737	-0.0625076	-0.0687103	-0.151619	-0.166367	-0.152596	-0.166367	0.0127754	-0.0680008	-0.111265	-0.152596	-0.00372124	-0.0205879	0.00872612	0.117979	0.0127754	-0.252623	-0.0687103	-0.252623	0.201353	0.264729	-0.0667572	-0.1534
Negative_PH3_Mean_Nucl_Integr_Intens_MultiWaveScoring_EdU	na	-0.0205879	0.414658	0.618579	0.315977	0.356525	0.573322	0.678791	-0.0687103	-0.151619	0.138046	0.364998	0.0127754	0.044981	-0.0713692	-0.0874615	-0.152145	0.0974197	-0.101913	-0.101218	-0.376158	-0.481525	-0.0687103	0.112247	0.515178	0.346097	0.439737	-0.0625076	-0.0687103	-0.151619	-0.166367	-0.152596	-0.166367	0.0127754	-0.0680008	-0.111265	-0.152596	-0.00372124	-0.0205879	0.00872612	0.117979	0.0127754	-0.252623	-0.0687103	-0.252623	0.201353	0.264729	-0.0667572	-0.1534
Negative_PH3_Mean_Stain_Area_MultiWaveScoring_EdU	na	0	0	-0.000463486	0	0	0	0	0	-0.000463486	0.375	0.840307	0.210938	0.210938	0	0	-1.21e-05	-0.000463486	0	0	0.609375	0.09375	0	0.308229	-0.0878481	-1.21e-05	0	-0.000463486	0	-0.000463486	0	-0.000463486	0	0	-0.000463486	0.0234375	-0.000463486	0	0	0.953125	0	0	0	0	0	0	0	0	0
Negative_PH3_Mean_Stain_Area_MultiWaveScoring_cyto	na	-5.15e-05	-0.0360165	-0.0542603	-0.000823975	-5.15e-05	-5.15e-05	-5.15e-05	-0.0360165	-0.00640869	0.764166	0.559143	0.204397	-0.000823975	-5.15e-05	-0.000823975	0.0103702	0.0513306	-0.0360165	-0.000226079	0.76059	0.089407	-0.00134849	0.176719	-0.00197352	-0.00262747	-0.000226079	0.0884399	-0.0360165	-0.0542603	-0.00134849	-0.00640869	-0.00134849	-5.15e-05	-0.0542603	-0.000823975	0.00543213	-0.000823975	-5.15e-05	0.185394	-0.000823975	-5.15e-05	-0.000823975	-0.00134849	-0.000823975	-0.000823975	-5.15e-05	-0.0360165	-5.15e-05
Negative_PH3_Mean_Stain_Aver_Intens_MultiWaveScoring_EdU	na	0.0213032	-0.324379	-0.439604	-0.192757	-0.0176411	0.244814	-0.105776	0.123085	-0.00564384	0.0456924	0.108915	0.158388	0.192635	-0.0322895	0.0269852	-0.0455662	0.0149212	0.123085	0.0961872	-0.164314	-0.328066	0.0453262	0.223166	0.0669034	-0.388828	-0.224117	0.0469036	0.0437393	0.0149212	0.0187149	-0.0461712	0.0194473	-0.0144672	-0.17935	-0.0694656	0.0882854	-0.0881288	0.0330219	-0.0675125	-0.0638504	0.00653267	0.057869	0.0187149	-0.136116	0.0721512	-0.0349751	-0.00809479	0.00934029
Negative_PH3_Mean_Stain_Aver_Intens_MultiWaveScoring_cyto	na	0.0763397	-0.462811	-0.1405	-0.0463104	-0.190598	0.0227509	-0.0381317	0.064373	-0.0847405	-0.0670586	-0.0847405	-0.149216	-0.0671844	-0.0183563	0.0602264	0.0152616	-0.0372527	0.0337334	0.117631	-0.484787	-0.523239	0.0408134	0.103383	-0.193367	-0.407596	-0.523052	-0.0315848	-0.031292	0.00532872	0.0863457	-0.0315848	0.0804863	-0.0325165	-0.380237	0.158371	-0.0341277	-0.0902557	0.0937958	-0.115036	0.0845184	0.00968933	0.0851288	0.027874	0.0682831	0.207687	-0.196335	-0.0513115	0.107101
Negative_TUBULIN_Mean_Cell_Aver_Intens_MultiWaveScoring_cyto	na	0.00197411	0.024704	-0.10953	0.526901	0.00197411	0.00197411	0.00197411	0.108932	-0.0676182	-0.017868	0.0931391	0.00197411	-0.0123749	0.00197411	-0.00395203	-0.0168393	0.246203	0.0685272	-0.0738385	-0.356735	-0.0898647	0.103073	0.089635	-0.0324315	-0.0366496	0.0207205	0.0661476	0.129684	0.0173119	0.133835	0.0583045	0.0845184	0.00197411	-0.157998	-0.0666962	0.0466011	-0.00395203	0.00197411	-0.00395203	-0.0123749	0.00197411	-0.0520477	-0.0210419	0.00810242	-0.0405731	-0.282492	0.183151	0.00197411
Negative_TUBULIN_Mean_Cell_Integr_Intens_MultiWaveScoring_cyto	na	-0.000219345	-0.0543003	-0.117493	0.0412733	0.0121822	0.0212154	0.0212154	0.0466099	0.13739	0.0340366	0.0592651	0.0212154	0.150648	0.0212154	0.0587365	-0.0737946	0.106506	0.114115	-0.0955438	-0.229386	-0.079565	-0.0661411	0.04532	-0.0488566	0.333213	0.0100597	-0.0164185	0.0441685	0.0964966	-0.0428257	-0.0586548	0.109842	0.0212154	-0.0357056	0.124116	0.0269165	0.179692	0.0212154	0.0261385	-0.0804584	-0.000219345	-0.138179	0.0551548	-0.042315	-0.0573272	-0.218481	-0.0661411	-0.000219345
Negative_TUBULIN_Mean_Cyto_Aver_Intens_MultiWaveScoring_cyto	na	0.0404434	-0.0113049	-0.0796509	0.45813	0.0404434	0.0312881	-0.0132217	0.0606213	-0.105286	0.0574474	0.0286255	-0.0132217	-0.0032959	-0.0132217	-0.0032959	-0.0177801	0.314148	0.115675	-0.155857	-0.423218	-0.49369	0.215284	-0.0509239	0.0646809	0.00881662	0.0696757	0.0963745	0.105665	0.055603	0.0475597	0.0465698	0.0829601	0.0404434	-0.164856	-0.0386963	0.0612183	-0.0032959	0.00662994	-0.0032959	-0.0032959	-0.0510635	-0.0137939	0.121778	0.00769043	-0.100464	-0.298866	0.215773	0.0808487
Negative_TUBULIN_Mean_Nucl_Aver_Intens_MultiWaveScoring_cyto	na	0.00432396	0.0313759	-0.0888538	0.489571	0.00432396	0.00432396	0.00432396	0.0556679	-0.0479603	0.0404091	0.108873	0.00432396	-0.00836945	0.00432396	-0.00836945	-0.014906	0.160997	0.0412636	-0.0990629	-0.370186	-0.0787869	0.0704384	0.0992924	-0.0231874	-0.0318563	0.0241814	-0.0463734	0.0822792	0.0142689	0.0556679	0.108873	0.0527382	0.00432396	-0.0463734	-0.0591507	0.0463734	-0.00836945	0.00432396	0.00226593	-0.00910187	-0.00359154	-0.0230179	0.0555458	0.00226593	-0.0471878	-0.263357	0.22559	0.00432396
Negative_TUBULIN_Mean_Nucl_Integr_Intens_MultiWaveScoring_cyto	na	0.0345192	-0.0647259	-0.0349374	0.0453758	0.00107193	0.114841	0.0345192	0.0886517	-0.0704766	0.0273724	-0.0699864	0.114841	0.201504	0.00107193	0.0646629	-0.0761868	0.070109	0.106108	-0.149276	-0.220058	0.00107193	0.0797405	0.0811933	-0.0850005	0.277045	0.0760391	-0.0368676	0.0321331	0.104239	0.0400677	0.0866837	0.138212	0.00107193	0.0323945	-0.148037	0.123908	0.198696	0.0345192	0.0284081	-0.0168114	0.00107193	-0.0964012	0.119291	-0.106899	-0.0453758	-0.0748024	0.0698528	0.00107193
Negative_TUBULIN_Mean_Stain_Area_MultiWaveScoring_cyto	na	-0.131008	-0.0459992	-0.0755998	0.162397	0.05083	-0.0154746	-0.0462957	0.345417	0.0498645	0.0349264	0.135986	-0.168354	-0.132246	-0.132907	-0.00968742	-0.10225	0.196433	0.0987798	-0.057361	-0.700117	-0.432325	0.280497	0.0888185	-0.0518265	0.0893455	0.0503534	0.168614	0.201142	0.132309	0.0989643	0.193308	0.144917	-0.072705	-0.201488	-0.144941	0.0774074	0.0102978	0.158489	0.092329	-0.0265331	0.0899231	-0.0747509	-0.0271754	0.0775585	-0.0716991	-0.236859	0.302212	0.0867368
Negative_TUBULIN_Mean_Stain_Aver_Intens_MultiWaveScoring_cyto	na	0.0122337	-0.0643796	-0.104116	0.506084	0.0122337	0.0122337	-0.0244408	0.223387	-0.0224514	0.04661	0.0783596	-0.0774193	-0.0229301	-0.0244408	-0.0229301	-0.0235156	0.118765	0.0863465	-0.0950081	-0.906719	-0.495998	0.38509	0.11962	-0.0192914	-0.0235156	0.0287065	0.0816555	0.0834972	0.0800686	0.122345	0.115835	0.0858869	-0.00271225	-0.225821	-0.0754204	0.116201	-0.0229301	0.0122337	0.0107231	-0.0135307	-0.00271225	-0.0430717	-0.038583	0.0107231	-0.0860405	-0.364651	0.304851	0.0122337
Negative_TUBULIN_Mean_Stain_Integr_Intens_MultiWaveScoring_cyto	na	-0.0429115	-0.0426884	-0.102692	0.428108	0.0261879	0.0198402	-0.0590248	0.268518	0.0502014	0.0259647	0.128937	-0.113956	-0.0285721	-0.0353432	0.00965118	-0.0704056	0.201324	0.0894413	-0.0320282	-0.708992	-0.4715	0.283167	0.107617	-0.0662248	0.113165	0.0577327	0.162872	0.156824	0.128937	0.120813	0.285919	0.128138	-0.0353432	-0.272858	0.134407	0.0798645	-0.0285721	-0.0429115	0.0291824	-0.026741	0.00482559	-0.270638	-0.0271854	0.0227127	-0.0816727	-0.201481	0.337732	-0.0429115
Nuclear_Area_Per_Cell_Transfluor_EdU	na	0.00134659	0.546713	0.644664	0.316135	0.566532	0.595341	0.616825	-0.072361	-0.12676	0.0910378	0.103323	0.0606728	0.116673	-0.0670204	-0.0946999	-0.236531	0.0554714	-0.158054	-0.522904	-0.538059	-0.65247	-0.072361	0.162764	0.562687	0.496889	0.634999	-0.125784	-0.158054	-0.174124	-0.158054	-0.125784	-0.149509	0.0153847	-0.110647	-0.392673	-0.125784	-0.0384254	-0.0185585	-0.318333	0.301243	0.00134659	-0.392673	-0.158054	-0.554173	0.193333	0.348759	-0.0763893	-0.0670204
Nuclear_Average_Intensity_Transfluor_EdU	na	0.00343323	-0.315929	-0.211592	-0.0320663	0.00343323	0.00343323	0.00343323	0.0275993	0.0253124	0.673189	0.531904	0.00343323	0.0711288	-0.00440979	-0.00301361	0.0592939	0.0215282	0.0554314	0.166081	0.665367	0.268082	0.0275993	0.491976	-0.0381535	0.149626	-0.0129002	-0.0489941	0.0610466	-0.0427685	0.0275993	-0.0489941	0.0275993	0.00343323	-0.0489941	0.578209	0.0253124	-0.00301361	0.00343323	0.00521088	0.00521088	0.00343323	0.150963	0.0554314	0.191002	0.0225449	0.00343323	0.0275993	0.00343323
Nuclear_Count_Transfluor_EdU	na	0.160325	-0.28264	-0.17236	-0.2457	-0.336949	-0.369914	-0.351808	0.230028	0.238536	-0.318285	-0.279468	-0.286795	-0.143984	0.180178	0.158322	-0.22081	0.189762	0.31621	-0.122527	-0.430933	-0.386704	0.181566	-0.114715	-0.305906	-0.455273	-0.381239	0.210656	0.283373	0.253794	0.257494	0.238536	0.17412	0.0549021	-0.280264	-0.312244	0.162127	-0.0437083	-0.0864278	0.201368	-0.0813615	-0.190196	-0.245118	0.257494	-0.387244	-0.33081	-0.297212	0.155077	0.249295
Nuclear_Division_Index_Micronuclei_EdU	na	0.0598049	-5.72e-06	-0.000310898	-0.00375175	-0.546621	-0.49291	-0.317007	-5.72e-06	-0.000310898	-5.72e-06	-0.000310898	-0.528555	-0.189177	0.030508	0.104094	-0.332563	-0.000310898	-5.72e-06	-0.289841	-0.764738	-0.506582	-5.72e-06	-0.016114	0.483316	-0.281991	0.107224	-0.000310898	-5.72e-06	-0.000310898	-5.72e-06	-0.000310898	-5.72e-06	0.0209866	-0.000310898	-0.764738	-0.000310898	0.0419598	0.0598049	-0.0247478	-0.0612469	-0.541739	-0.61215	-5.72e-06	-0.388517	-0.269377	-0.582754	-5.72e-06	0.228262
Nuclear_Integrated_Intensity_Transfluor_EdU	na	0.226254	-0.0626087	-0.0710137	-0.181776	-0.170467	-0.0794029	0.104183	0.143908	0.158636	-0.0866566	-0.156951	0.104183	-0.152885	0.104183	0.184625	-0.199123	0.187037	0.244493	-0.223967	-0.304172	-0.465755	0.218859	0.0362578	-0.185797	-0.450239	-0.375277	0.251559	0.304186	0.177294	0.252916	0.198802	0.169664	0.136166	-0.259218	-0.29878	0.159892	-0.108155	-0.0610924	0.111525	-0.138118	-0.138363	-0.264466	0.273424	-0.354417	-0.233492	-0.136776	0.143908	0.165707
Nuclear_Total_Area_Transfluor_EdU	na	0.210513	-0.0508041	-0.0382101	-0.161077	-0.163086	-0.303864	-0.133246	0.185204	0.217622	-0.380638	-0.30359	-0.273319	-0.184301	0.159594	0.146739	-0.259255	0.174485	0.283348	-0.30196	-0.354429	-0.440966	0.283348	-0.0768858	-0.181029	-0.468595	-0.376698	0.189619	0.261742	0.217622	0.283348	0.217622	0.191063	0.094704	-0.285943	-0.346126	0.143541	-0.0909488	-0.0921917	0.114631	-0.0958814	-0.183889	-0.298394	0.283348	-0.377131	-0.337242	-0.239679	0.218651	0.248197
Outer_radius_IMA_Summary_EdU	na	-0.00837707	0.720349	0.612408	0.325069	0.39534	0.39534	0.626785	-0.0229206	0.0091362	0.17087	0.115582	-0.00837707	0.013546	0.001297	0.013546	-0.0529253	0.0584526	-0.0179157	-0.400339	-0.625851	-0.602371	-0.0179157	0.21836	0.626412	0.396466	0.500472	0.0091362	-0.0229206	-0.0848198	-0.0229206	0.0091362	-0.101656	0.001297	-0.031353	-0.251827	0.0584526	0.0618858	0.0808868	-0.025753	0.0618858	0.0254669	-0.251827	-0.0229206	-0.328487	0.561764	0.39534	-0.0229206	0.001297
Outer_radius_IMA_Summary_cyto	na	-0.0494709	0.520983	0.651295	0.30508	0.549227	-0.0494709	-0.0494709	-0.116564	-0.0839119	0.0895863	0.0735359	0.155916	0.0228539	-0.0494709	-0.121975	0.0162897	-0.0706062	0.01964	-0.276197	-0.485989	-0.38199	-0.0482044	0.314326	0.488684	0.567071	0.48281	-0.0839119	-0.0182972	-0.0933113	-0.116564	-0.0839119	-0.109362	-0.0267658	-0.27837	-0.0503197	0.0106697	0.0228539	0.13431	0.0228539	0.0228539	0.0331135	-0.0503197	-0.109362	-0.121975	0.39175	0.549227	-0.116564	-0.188631
Pct_Binucleated_Cells_Micronuclei_EdU	na	0.177088	-0.00235558	-0.0258083	-0.119211	-0.361585	-0.285176	-0.392131	-0.00235558	-0.0258083	-0.00235558	-0.00749779	-0.359257	-0.48823	-0.0129945	0.0851536	-0.307461	-0.0258083	-0.00235558	-0.303281	-0.658518	-0.431898	-0.00235558	-0.00152768	0.374871	-0.123007	0.036854	-0.00395775	-0.00235558	0.113943	-0.00235558	-0.00395775	-0.00235558	0.0214198	-0.0258083	-0.658518	-0.0258083	0.0429173	0.0541404	0.035593	-0.0574436	-0.37721	-0.48823	-0.00235558	-0.658518	-0.288279	-0.406132	-0.00235558	0.0630558
Pct_Binucleated_Cells_Micronuclei_cyto	na	-0.0922203	0.0158749	0.103355	0.281294	0.289608	-0.249203	0.147884	-0.000738144	-0.00289154	-0.000738144	-0.00289154	0.194393	0.314985	-0.148861	0.0435009	-0.00449745	-0.00289154	-0.000738144	-0.392895	-0.497602	-0.104794	-0.000738144	-0.0337452	0.45804	0.297606	0.287148	-0.00289154	-0.000738144	-0.00289154	-0.000738144	-0.00289154	-0.000738144	-0.237484	-0.00289154	-0.497602	-0.00289154	0.0686474	0.195004	0.223555	0.0872021	0.13287	-0.029707	-0.000738144	-0.0688915	-0.101118	-0.319271	-0.000738144	-0.294613
Pct_Mitotic_Cells_Micronuclei_EdU	na	0.0986729	0	0.000376298	-0.028698	-0.202433	0.608316	-0.202433	0	-0.604053	0	0.000376298	0.55839	0.0549431	-0.00467873	-0.0970573	0.307473	0.000376298	0	0.334202	0.77882	0.532999	0	0.0424583	0	0.317309	-0.0884965	0.000376298	0	0.000376298	0	0.000376298	0	0.0499668	0.000376298	0.77882	-0.604053	-0.014904	-0.0896397	-0.0290642	0.051281	0.0986729	0.614758	0	0.189085	0.191784	0.0986729	0	0.0325108
Pct_Multinucleated_Cells_Micronuclei_EdU	na	0.11813	-0.00028038	-0.000427246	-0.129339	-0.474331	-0.394009	-0.297329	-0.00028038	-0.000427246	-0.00028038	-0.000427246	-0.305752	-0.291815	0.0464745	0.0927181	-0.0775027	-0.000427246	-0.00028038	-0.634767	-0.424871	-0.736172	-0.00028038	-0.000395119	-2.52e-05	-0.0775027	-0.137766	0.0534058	-0.00028038	-0.000427246	-0.00028038	-0.000427246	-0.00028038	0.139248	-0.000427246	-0.291815	-0.000427246	0.0436459	0.0485497	0.096014	-0.0600033	-0.514736	-0.424871	-0.00028038	-0.424871	-0.424871	-0.34164	-0.00028038	0.30978
Pct_Positive_EdU_MultiWaveScoring_EdU	na	-0.0460987	-0.0378056	-0.503515	-0.506882	-0.60103	0.53792	0.727617	0.0312138	0.158911	-0.547815	-0.476416	-0.544268	-0.589401	0.505693	0.544357	-0.592056	0.0789547	0.148401	-0.234608	0.522385	0.404619	0.0382938	-0.253466	-0.651215	-0.684551	-0.34407	0.110693	0.156946	-0.044775	-0.0149784	0.0791988	-0.100794	0.0590382	-0.0580807	-0.036911	-0.41831	-0.558517	-0.544268	0.204758	0.456467	-0.445635	-0.506882	0.148401	-0.328293	-0.076828	-0.560015	0.110437	-0.3398
Pct_Positive_PH3_MultiWaveScoring_EdU	na	0.00664329	-0.855465	-0.41799	-0.391602	-0.282034	0.689749	-0.282034	0.004879	0.00234032	0.660152	0.614767	0.736624	0.575195	-0.00517845	-0.000976563	-0.00037493	-0.00588036	-0.00927353	-0.00176986	0.493164	0.168509	0.004879	0.61291	-0.372533	-0.35417	-0.386815	-0.00588036	0.004879	-0.00588036	0.004879	-0.00588036	0.00707626	-0.00517845	-0.41799	0.219727	-0.118185	-0.391602	-0.282034	0.264648	-0.102539	0.00664329	-0.391602	-0.00927353	-0.0283203	-0.000976563	0.284964	-0.00927353	0.00664329
Pct_Positive_PH3_MultiWaveScoring_cyto	na	0.0137386	-0.86372	-0.513844	-5.15e-05	-0.00128746	-0.00128746	-0.00128746	-0.0795403	-0.0480232	0.501904	0.629566	0.964666	0.443655	0.0137386	-5.15e-05	0.0622302	-0.00908279	0.0202141	-0.0381217	0.788137	-0.00128746	-0.0285149	0.590811	-0.356494	-0.0440243	-0.0381217	-0.00908279	-0.137402	-0.0480232	-0.0882072	-0.00908279	-0.00873947	0.0137386	-0.327076	0.0212917	-0.0480232	-5.15e-05	-0.00128746	-5.15e-05	0.0212917	0.0730648	-5.15e-05	-0.00873947	-5.15e-05	-5.15e-05	-0.00128746	-0.00642014	-0.00128746
Pct_Positive_TUBULIN_MultiWaveScoring_cyto	na	-0.0504083	0	0	0	0.0551329	-0.0504083	-0.00510817	0	0	0	0	-0.196128	0	-0.00510817	0	0	0	0	8.11e-06	0	0.0551329	0	0.0467452	0	0	8.11e-06	0	0	0	0	0	0	-0.00510817	-0.25	0	0	0	-0.142583	0	0	0.0551329	0	0	0	0	0.0551329	0	-0.0504083
Pct_ProbeAB_Positive_Cells_Micronuclei_EdU	na	0	0	0	0	0	0	0	0	0	0	0	0	0	0	0	0	0	0	-0.625	0	0	0	0	0	0	-0.625	0	0	0	0	0	0	0	0	0	0	0	0	0	0	0	0	0	0	0	0	0	0
Pct_ProbeA_Positive_Cells_Micronuclei_EdU	na	0	0	0	0	0	0	0	0	0	0	0	0	0	0	0	0	0	0	-0.625	0	0	0	0	0	0	-0.625	0	0	0	0	0	0	0	0	0	0	0	0	0	0	0	0	0	0	0	0	0	0
Pct_ProbeB_Positive_Cells_Micronuclei_EdU	na	0	0	0	0	0	0	0	0	0	0	0	0	0	0	0	0	0	0	-0.625	0	0	0	0	0	0	-0.625	0	0	0	0	0	0	0	0	0	0	0	0	0	0	0	0	0	0	0	0	0	0
Perimeter_IMA_Summary_EdU	na	0.00225258	0.70886	0.848492	0.348091	0.580378	0.580378	0.707819	-0.0278702	-0.0232964	0.145546	0.219097	0.0136051	0.0314407	0.00225258	0.00299835	-0.150219	0.0403862	-0.115761	-0.36434	-0.5998	-0.561823	-0.0278702	0.175376	0.62438	0.391569	0.624036	0.0162163	-0.0278702	-0.131207	-0.0307999	0.0162163	-0.115761	0.00225258	-0.0232964	-0.230171	0.0403862	0.0177689	0.0136051	-0.146187	0.152534	0.0136051	-0.319038	-0.0278702	-0.319038	0.348091	0.34527	-0.0307999	0.00225258
Perimeter_IMA_Summary_cyto	na	-0.0117226	0.617737	0.870621	0.349537	0.514164	-0.106449	-0.106449	-0.1686	-0.121597	0.111959	0.0764313	0.0522499	0.0712166	-0.106449	-0.0619392	-0.00589394	-0.134415	-0.0162563	-0.247984	-0.435841	-0.344486	-0.0316372	0.361439	0.524126	0.763881	0.488916	-0.121597	-0.0316372	-0.121597	-0.156149	-0.121597	-0.156149	-0.0109901	-0.228897	-0.0619392	-0.0545807	0.00407791	0.0952187	0.00407791	0.0712166	0.0405312	-0.0773201	-0.156149	-0.123951	0.361866	0.537601	-0.156149	-0.122807
Pit_Area_Per_Cell_Transfluor_cyto	na	-0.00206566	0.04953	0.4464	0	-0.0394192	-0.0394192	-0.0394192	-0.0163269	0.263294	-0.0163269	0.10326	-0.0394192	0	-0.0394192	0	0	0.107533	-0.0163269	0	0	-0.0394192	-0.0163269	-0.15064	0.491377	0	0	0.267689	-0.0163269	0.267689	-0.0163269	0.340443	-0.0163269	-0.00206566	-0.367176	0	-0.0412483	0	-0.0394192	0	0	-0.0394192	0	-0.0163269	0	0	0.0115871	-0.0163269	-0.0394192
Pit_Average_Intensity_Transfluor_EdU	na	0.585711	-0.769867	-0.551941	-0.578211	-0.283464	-0.451677	-0.454607	0.298431	0.38324	-0.471527	-0.403992	-0.520769	-0.599817	-0.407	0.0439091	-0.257956	0.26947	0.366669	-0.103384	-0.592859	-0.314714	0.285736	-0.379664	-0.763417	-0.667205	-0.729152	0.335632	0.413055	0.137634	0.369354	0.319031	0.369354	0.761492	-0.222229	-0.543055	-0.302429	-0.595301	-0.468401	0.567143	-0.648035	-0.473162	-0.529139	0.37558	-0.108728	-0.592859	-0.417376	0.413055	-0.346941
Pit_Average_Intensity_Transfluor_cyto	na	0.0878754	-0.192356	-0.131119	0.638733	-0.0419769	-0.0419769	-0.0419769	0.141087	0.240005	0.434408	0.486832	0.0878754	0.0137329	-0.0419769	-0.0176392	0.0565281	0.261124	0.143284	-0.00365744	-0.27594	-0.316635	0.176731	0.475428	-0.0249002	-0.0189653	-0.0612746	0.240005	0.0422096	0.153214	0.0346413	0.39711	0.216404	0.0295258	-0.302505	0.344299	-0.0166168	-0.0176392	-0.0419769	0.0137329	0.0586548	-0.0419769	-0.0176392	0.143284	-0.0176392	0.134827	-0.0419769	0.143284	-0.0419769
Pit_Count_Transfluor_EdU	na	0.330822	-0.231577	-0.475758	-0.781834	-0.805431	-0.805431	-0.441906	0.180674	0.224903	-0.414438	-0.071949	-0.805431	-0.781834	0.552068	0.550497	-0.373421	0.341969	0.329844	-0.429247	-0.781834	-0.805431	0.379648	-0.102075	-0.831785	-0.715487	-0.595509	0.128834	0.270517	0.196339	0.198374	0.300465	0.149912	0.157726	-0.313648	-0.487888	-0.475758	-0.411228	-0.392834	0.0469704	-0.0246315	-0.57008	-0.781834	0.176401	-0.781834	-0.781834	-0.805431	0.151499	-0.17799
Pit_Count_Transfluor_cyto	na	0.202505	0.0502962	0.0718651	0.449285	-0.132071	0.310415	-0.342276	0.209395	0.275478	-0.111111	-0.0548973	-0.216421	-0.311237	0.255972	0.315876	0.0352789	0.177578	0.301368	0.184614	-0.753864	-0.462515	0.308415	-0.126358	0.0149939	-0.106568	-0.229466	0.27499	0.192545	0.329189	0.301368	0.305874	0.311356	0.202505	-0.27853	-0.130329	0.161098	-0.0956612	0.244131	-0.0928535	-0.227985	-0.163931	-0.157673	0.192606	0.132771	-0.256184	-0.187368	0.192606	0.206656
Pit_Integrated_Intensity_Transfluor_EdU	na	0.428013	-0.609421	-0.690277	-0.719254	-0.723179	-0.723179	-0.465	0.284225	0.307098	-0.488205	-0.451019	-0.723179	-0.719254	0.339932	0.424657	-0.434576	0.26181	0.354904	-0.459628	-0.719254	-0.723179	0.319382	-0.388181	-0.720705	-0.726527	-0.720521	0.325409	0.366013	0.211761	0.332932	0.407074	0.319382	0.268345	-0.376434	-0.719254	-0.451019	-0.719254	-0.465	0.419449	-0.318619	-0.504185	-0.719254	0.334518	-0.719254	-0.719254	-0.723179	0.352341	-0.334751
Pit_Integrated_Intensity_Transfluor_cyto	na	0.175161	-0.0818627	-0.159531	0.472689	-0.149893	-0.20043	-0.24938	0.257874	0.25267	0.100735	0.11058	-0.24938	-0.179558	0.19628	0.169304	0.0291505	0.283256	0.293076	0.137369	-0.756218	-0.604361	0.248866	-0.100034	0.0568275	-0.204792	-0.221074	0.307114	0.14565	0.282333	0.159681	0.30687	0.327267	0.175161	-0.342636	0.0994797	0.129868	-0.107536	-0.20043	-0.0692062	-0.107536	-0.168692	-0.177116	0.293076	0.0994797	-0.0692062	-0.187368	0.209681	0.241079
Pit_Total_Area_Transfluor_EdU	na	0.364176	-0.383335	-0.535053	-0.769089	-0.787027	-0.787027	-0.458658	0.26041	0.288471	-0.455357	-0.321674	-0.787027	-0.769089	0.502468	0.472702	-0.439022	0.23122	0.415195	-0.478313	-0.769089	-0.787027	0.338535	-0.302186	-0.823963	-0.725771	-0.599551	0.298725	0.349033	0.197407	0.254795	0.23122	0.26041	0.189859	-0.4529	-0.472946	-0.542988	-0.395187	-0.42277	0.451706	-0.0679169	-0.562662	-0.769089	0.381016	-0.769089	-0.769089	-0.787027	0.338535	-0.272379
Pit_Total_Area_Transfluor_cyto	na	0.209229	-0.0916897	-0.114506	0.433908	-0.10376	0.2854	0.318237	0.235287	0.28931	-0.125268	0.0620155	-0.268188	-0.252756	0.330566	0.301096	0.0375983	0.192265	0.327474	0.186998	-0.731516	-0.494995	0.311972	-0.128035	0.0600312	-0.267997	-0.214202	0.28931	0.179741	0.332279	0.187768	0.287846	0.294386	0.151245	-0.286991	-0.144968	0.109501	-0.199778	0.318237	-0.133249	-0.208933	-0.197266	-0.208933	0.20468	0.185373	-0.174631	-0.208618	0.20468	0.23938
Pixel_area_IMA_Summary_EdU	na	-0.0429611	0.541841	0.55838	0.398823	0.586418	0.608025	0.598381	-0.0727386	-0.10379	0.122299	0.112579	0.0107346	0.0954781	0.0153732	-0.0769234	-0.209718	0.109161	-0.204819	-0.489187	-0.484638	-0.626701	-0.123154	0.141943	0.558208	0.49906	0.576868	-0.0908508	-0.204819	-0.223419	-0.204819	-0.0908508	-0.205063	0.0373459	-0.10379	-0.353046	-0.0908508	0.0312691	-0.0429611	-0.274677	0.215473	0.0107346	-0.353046	-0.123154	-0.315693	0.368671	0.486565	-0.0535736	-0.0135422
Pixel_area_IMA_Summary_cyto	na	-0.0559139	0.515305	0.677108	0.433189	0.558233	-0.0882626	-0.122076	-0.0894012	-0.0687504	0.0947723	0.0448246	0.0710506	0.0962753	-0.0856991	-0.0970078	-0.0129476	-0.143091	-0.0740204	-0.205822	-0.446251	-0.276251	-0.104904	0.384388	0.441799	0.586364	0.515497	-0.241236	-0.104904	-0.241236	-0.104904	-0.152491	-0.260422	-0.00281334	-0.205347	-0.155235	-0.0949955	0.022789	0.0278378	0.022789	0.149498	0.0710506	-0.14315	-0.167038	-0.24044	0.43795	0.535772	-0.104904	-0.122076
Positive_ACTIN_Mean_Cell_Aver_Intens_MultiWaveScoring_cyto	na	0.212498	-0.12371	-0.0534338	0.216159	0.227081	-0.246444	-0.188111	0.218471	0.318998	0.213232	0.1201	-0.176897	-0.160767	-0.217829	-0.149983	0.0283332	0.338115	0.161363	-0.0611768	-0.443426	-0.358209	0.198342	0.181098	0.133153	0.106755	0.0514112	0.173471	0.138661	0.300554	0.220952	0.173471	0.214702	0.212498	-0.311553	0.297042	0.0796899	0.216159	0.263172	0.110614	-0.160767	-0.176897	-0.138463	0.259371	-0.161318	-0.0910366	-0.176897	0.262313	0.22224
Positive_ACTIN_Mean_Cyto_Aver_Intens_MultiWaveScoring_cyto	na	0.21686	-0.202972	0.0546227	0.177753	0.262265	0.242595	-0.163919	0.245803	0.320186	0.156924	0.104623	-0.191186	-0.169297	-0.220353	0.159554	0.00736463	0.293838	0.205606	0.0482638	-0.42377	-0.404728	0.222089	0.0884879	0.159777	0.0382305	0.0766158	0.2545	0.149969	0.316816	0.222947	0.2545	0.222089	0.170628	-0.280358	0.17573	0.101528	0.227201	0.223845	0.144848	-0.222789	-0.191186	-0.196319	0.219516	-0.147054	-0.156061	-0.133588	0.210754	0.216676
Positive_ACTIN_Mean_Nucl_Aver_Intens_MultiWaveScoring_cyto	na	0.244519	0.220333	-0.251822	0.154045	-0.278955	-0.329752	-0.162289	0.267086	0.254507	0.201168	0.183096	-0.141272	-0.176506	-0.254078	-0.154533	-0.000137641	0.365835	0.150387	-0.033555	-0.056633	0.314066	0.179684	0.369228	0.0746557	-0.000137641	-0.00558347	0.0499172	0.122677	0.245718	-0.272701	0.0499172	0.191036	0.314066	-0.247183	0.523674	-0.0440578	-0.134758	0.314066	0.0992355	-0.176506	-0.141272	-0.154533	0.199581	-0.176506	-0.154533	-0.214556	0.233639	0.259409
Positive_ACTIN_Mean_Nucl_Integr_Intens_MultiWaveScoring_cyto	na	0.219822	0.755583	0.434902	0.342985	0.243748	-0.160252	-0.14365	0.238493	0.11166	0.249479	0.210781	-0.109226	-0.152311	-0.109226	-0.0570965	-0.0203051	0.145596	0.156218	-0.0875942	-0.260344	-0.0894508	0.143278	0.461169	0.556003	0.458782	0.26491	-0.0276756	0.143278	-0.00179672	-0.155485	-0.0276756	0.156218	0.219822	-0.394375	0.452116	-0.193935	-0.0744305	0.158054	0.0661297	-0.0570965	-0.14365	-0.0575848	0.161589	-0.260344	0.314421	0.219822	0.200407	-0.160252
Positive_ACTIN_Mean_Stain_Area_MultiWaveScoring_cyto	na	-0.127001	0.147194	0.20902	0.305347	0.174486	-0.195971	-0.195971	-0.230825	-0.192364	0.176016	0.119854	0.155809	0.156422	-0.195971	-0.232594	0.09308	-0.186504	-0.135122	-0.0723593	-0.167164	0.0446033	-0.333609	0.0521627	0.263061	0.569608	0.385261	-0.269024	-0.218008	-0.297344	-0.318594	-0.269024	-0.274893	-0.097826	0.124004	0.213673	-0.148663	-0.0342293	-0.0851307	-0.0980721	0.183521	0.140429	0.0969734	-0.230825	-0.0336189	0.296925	0.402025	-0.230825	-0.199511
Positive_ACTIN_Mean_Stain_Integr_Intens_MultiWaveScoring_cyto	na	-0.0549736	0.245682	0.308516	0.39689	0.272137	-0.142742	-0.277996	-0.0530548	-0.121748	0.399612	0.455488	-0.0801201	-0.118458	-0.12199	-0.190701	0.0257861	-0.0735302	-0.0971222	-0.0696525	-0.272073	-0.0228691	-0.0980988	0.295692	0.412902	0.382789	0.447861	-0.268476	-0.130325	-0.251997	-0.254959	-0.312788	-0.0971222	-0.0610771	-0.0498486	0.372257	-0.152021	-0.0522818	0.0847588	0.116375	-0.0525269	-0.0549736	-0.043734	-0.130325	-0.054886	0.364047	0.272137	-0.0971222	-0.12199
Positive_ACTIN_MultiWaveScoring_cyto	na	0.141698	-0.0771436	-0.0966873	-0.181622	-0.124357	0.29519	0.195558	0.230024	0.253548	-0.0713532	-0.0959549	-0.204994	-0.132664	0.306036	0.269031	-0.115119	0.189217	0.236856	0.0784079	-0.296022	-0.412102	0.242524	-0.0943026	-0.199438	-0.403038	-0.318125	0.308479	0.187622	0.342171	0.334129	0.333382	0.369362	0.0966303	-0.205086	-0.181622	0.186165	0.105887	0.127176	0.110421	-0.132664	-0.136122	0.0770881	0.242524	-0.0402928	-0.145348	-0.305239	0.252082	0.301563
Positive_EdU_Mean_Cell_Aver_Intens_MultiWaveScoring_EdU	na	0.58339	-0.528524	-0.474884	-0.579468	-0.50559	-0.509497	-0.515356	0.394979	0.420929	-0.452841	-0.413971	-0.515844	-0.583374	0.114843	0.509399	-0.266236	0.340363	0.339437	-0.193595	-0.579468	-0.50559	0.341391	-0.290138	-0.530727	-0.670672	-0.552603	0.340363	0.430258	0.340363	0.418173	0.329254	0.390951	0.61875	-0.223419	-0.532959	-0.375397	-0.536133	-0.43894	0.528307	-0.536499	-0.412573	-0.478638	0.394979	-0.264893	-0.579468	-0.412451	0.418173	-0.287939
Positive_EdU_Mean_Cell_Integr_Intens_MultiWaveScoring_EdU	na	0.382607	-0.496567	-0.476612	-0.606628	-0.512245	-0.470619	-0.470253	0.427231	0.3521	-0.477524	-0.319263	-0.506386	-0.610046	0.032753	0.446472	-0.511784	0.401905	0.442368	-0.453089	-0.599792	-0.51664	0.365219	-0.392206	-0.545949	-0.630855	-0.570687	0.297535	0.427231	0.214283	0.451157	0.245289	0.287094	0.550575	-0.269093	-0.546814	-0.341114	-0.54071	-0.423744	0.442078	-0.562073	-0.413002	-0.5047	0.427231	-0.402649	-0.606628	-0.47123	0.423569	-0.374428
Positive_EdU_Mean_Nucl_Aver_Intens_MultiWaveScoring_EdU	na	0.58339	-0.528524	-0.474884	-0.579468	-0.50559	-0.509497	-0.515356	0.394979	0.420929	-0.452841	-0.413971	-0.515844	-0.583374	0.114843	0.509399	-0.266236	0.340363	0.339437	-0.193595	-0.579468	-0.50559	0.341391	-0.290138	-0.530727	-0.670672	-0.552603	0.340363	0.430258	0.340363	0.418173	0.329254	0.390951	0.61875	-0.223419	-0.532959	-0.375397	-0.536133	-0.43894	0.528307	-0.536499	-0.412573	-0.478638	0.394979	-0.264893	-0.579468	-0.412451	0.418173	-0.287939
Positive_EdU_Mean_Nucl_Integr_Intens_MultiWaveScoring_EdU	na	0.382607	-0.496567	-0.476612	-0.606628	-0.512245	-0.470619	-0.470253	0.427231	0.3521	-0.477524	-0.319263	-0.506386	-0.610046	0.032753	0.446472	-0.511784	0.401905	0.442368	-0.453089	-0.599792	-0.51664	0.365219	-0.392206	-0.545949	-0.630855	-0.570687	0.297535	0.427231	0.214283	0.451157	0.245289	0.287094	0.550575	-0.269093	-0.546814	-0.341114	-0.54071	-0.423744	0.442078	-0.562073	-0.413002	-0.5047	0.427231	-0.402649	-0.606628	-0.47123	0.423569	-0.374428
Positive_EdU_Mean_Stain_Area_MultiWaveScoring_EdU	na	-0.0224495	-0.229254	0.0726547	-0.417475	-0.430531	0.0080452	-0.0681038	-0.0999813	-0.136009	0.191534	0.0833969	0.128895	-0.0806828	-0.576649	-0.565912	-0.245603	0.0497055	-0.151861	-0.598883	-0.545771	-0.642567	-0.0793514	0.0890173	-0.531404	-0.597096	-0.539975	0.0796127	-0.234991	0.092186	-0.0793514	0.092186	-0.156012	0.0283089	-0.136009	-0.487055	-0.136009	0.0284367	0.302967	-0.529779	0.115107	-0.0810432	-0.40661	-0.151861	-0.463617	-0.512934	-0.43578	-0.0899715	0.0080452
Positive_EdU_Mean_Stain_Aver_Intens_MultiWaveScoring_EdU	na	0.58549	-0.534605	-0.476051	-0.611208	-0.506226	-0.510132	-0.453979	0.417906	0.430885	-0.468931	-0.417824	-0.468872	-0.614138	0.219604	0.549929	-0.286015	0.336891	0.360167	-0.0898425	-0.611208	-0.506226	0.370298	-0.341402	-0.483261	-0.668688	-0.572264	0.336891	0.449888	0.333473	0.447691	0.326149	0.417173	0.620972	-0.233009	-0.539553	-0.280373	-0.564943	-0.453857	0.475737	-0.567263	-0.468872	-0.487185	0.417906	-0.223757	-0.611208	-0.41394	0.447691	-0.34021
Positive_EdU_Mean_Stain_Integr_Intens_MultiWaveScoring_EdU	na	0.383169	-0.538849	-0.476967	-0.549423	-0.447866	-0.51586	-0.471914	0.425812	0.418007	-0.458527	-0.370522	-0.466665	-0.604111	-0.0892239	0.176254	-0.495894	0.399452	0.439606	-0.44815	-0.594345	-0.518789	0.367462	-0.381378	-0.544664	-0.87337	-0.50674	0.293983	0.425812	0.210121	0.451935	0.242226	0.292267	0.550039	-0.267738	-0.541367	-0.283607	-0.539413	-0.480215	0.277451	-0.603622	-0.455557	-0.555893	0.425812	-0.399399	-0.594345	-0.469961	0.423248	-0.369131
Positive_EdU_MultiWaveScoring_EdU	na	0.286659	-0.201332	-0.404367	-0.416857	-0.599159	-0.238564	0.26371	0.230751	0.261667	-0.449623	-0.421701	-0.480019	-0.431017	0.529823	0.561551	-0.350232	0.111887	0.406532	-0.487385	0.0619984	-0.321083	0.310585	-0.368624	-0.493097	-0.747379	-0.473922	0.157175	0.309486	0.104807	0.13224	0.171946	0.196327	0.0849991	-0.333445	-0.384386	-0.406565	-0.291246	-0.286659	0.213488	0.247179	-0.234413	-0.319445	0.3433	-0.581652	-0.384386	-0.419228	0.261269	-0.119911
Positive_PH3_Mean_Cell_Aver_Intens_MultiWaveScoring_EdU	na	-0.044548	0.103157	-0.459423	0.0359726	-0.46093	-0.312737	-0.572014	-0.00855255	0.00593185	-0.461678	-0.554882	-0.393303	-0.0729599	-0.0318527	-0.0492783	0.0431789	0.0390129	0.0656815	-0.169216	-0.516563	-0.572014	-0.0334549	-0.288318	0.323264	-0.566093	-0.597089	0.0390129	0.0669022	0.021801	0.0205154	-0.0213127	-0.00855255	0.297356	-0.378124	0.0584335	0.212475	0.0564804	0.0301437	-0.431847	0.0884628	0.0318527	0.427452	0.0669022	0.158897	0.0190048	-0.532463	0.0156326	-0.0112228
Positive_PH3_Mean_Cell_Aver_Intens_MultiWaveScoring_cyto	na	0.0956459	-0.377726	-0.649093	0.162754	-0.225895	0.0658607	-0.0272865	0.00589943	-0.032549	-0.546671	-0.508039	-0.502995	-0.216465	0.0658607	0.056797	-0.0322055	-0.00491422	0.00589943	0.0779491	-0.517612	-0.528019	-0.0408115	-0.0932455	0.0460753	-0.877525	-0.889298	-0.0914338	0.0959873	-0.00491422	0.00589943	-0.00491422	0.00589943	0.0414467	-0.162022	0.411045	-0.032549	-0.0189552	-0.0272865	-0.0360451	-0.0360451	-0.0438881	-0.00723648	0.00589943	0.287998	0.12418	0.228458	0.00858498	-0.0272865
Positive_PH3_Mean_Cell_Integr_Intens_MultiWaveScoring_EdU	na	0.00922203	0.369139	-0.359646	0.257799	-0.602972	-0.0093441	-0.42536	-0.00109673	-0.0316429	-0.235228	-0.328518	-0.267767	-0.0366077	-0.0407162	-0.0495472	0.0607141	-0.0106468	-0.0313702	-0.12725	-0.579576	-0.590643	-0.0170879	0.0592826	0.40244	-0.385212	-0.395351	-0.0106468	-0.0170879	-0.0381126	-0.0313702	-0.0381126	-0.0170879	0.0910091	-0.0758324	-0.0366077	0.106106	0.0224476	0.0499935	-0.250475	0.112535	0.04035	0.341295	-0.0313702	-0.0328236	0.219713	-0.103338	-0.0313702	0.00922203
Positive_PH3_Mean_Cyto_Aver_Intens_MultiWaveScoring_cyto	na	-0.010719	-0.216249	-0.52388	0.0741345	-0.241417	-0.010719	-0.010719	-0.0264301	-0.00751946	-0.404238	-0.204394	-0.184248	-0.0568551	-0.010719	0.0784237	-0.0325785	-0.00439446	-0.0448627	0.0600749	-0.365924	-0.497974	-0.0448627	-0.0449667	-0.000113	-0.922191	-0.915613	-0.00439446	0.0495014	-0.00439446	-0.0264301	-0.00439446	-0.0448627	0.0148243	-0.121306	0.569355	-0.00439446	-0.0568551	-0.010719	-0.00513937	-0.0568551	-0.093991	-0.0153722	0.0315571	0.0784237	-0.0733379	-0.00722631	-0.00531197	-0.010719
Positive_PH3_Mean_Nucl_Aver_Intens_MultiWaveScoring_EdU	na	-0.044548	0.103157	-0.459423	0.0359726	-0.46093	-0.312737	-0.572014	-0.00855255	0.00593185	-0.461678	-0.554882	-0.393303	-0.0729599	-0.0318527	-0.0492783	0.0431789	0.0390129	0.0656815	-0.169216	-0.516563	-0.572014	-0.0334549	-0.288318	0.323264	-0.566093	-0.597089	0.0390129	0.0669022	0.021801	0.0205154	-0.0213127	-0.00855255	0.297356	-0.378124	0.0584335	0.212475	0.0564804	0.0301437	-0.431847	0.0884628	0.0318527	0.427452	0.0669022	0.158897	0.0190048	-0.532463	0.0156326	-0.0112228
Positive_PH3_Mean_Nucl_Aver_Intens_MultiWaveScoring_cyto	na	0.00686455	-0.341366	-0.59491	0.0593586	-0.207548	-0.0176067	-0.0176067	-0.0437584	-0.0811234	-0.476864	-0.586209	-0.568876	-0.299105	-0.0532513	0.0299397	-0.0601877	-0.118562	0.0243492	0.0650123	-0.478548	-0.475981	-0.0693932	-0.366928	0.0515331	-0.85776	-0.846995	-0.187251	0.0493736	-0.028029	-0.0225182	-0.028029	0.0411949	0.00686455	-0.15453	0.156527	-0.118562	-0.00992012	-0.0132122	-0.171175	-0.0112629	-0.0176067	0.0224934	0.0143394	0.385042	0.0462971	0.253325	0.0165367	-0.0132122
Positive_PH3_Mean_Nucl_Integr_Intens_MultiWaveScoring_EdU	na	0.00922203	0.369139	-0.359646	0.257799	-0.602972	-0.0093441	-0.42536	-0.00109673	-0.0316429	-0.235228	-0.328518	-0.267767	-0.0366077	-0.0407162	-0.0495472	0.0607141	-0.0106468	-0.0313702	-0.12725	-0.579576	-0.590643	-0.0170879	0.0592826	0.40244	-0.385212	-0.395351	-0.0106468	-0.0170879	-0.0381126	-0.0313702	-0.0381126	-0.0170879	0.0910091	-0.0758324	-0.0366077	0.106106	0.0224476	0.0499935	-0.250475	0.112535	0.04035	0.341295	-0.0313702	-0.0328236	0.219713	-0.103338	-0.0313702	0.00922203
Positive_PH3_Mean_Nucl_Integr_Intens_MultiWaveScoring_cyto	na	-0.00795174	-0.344933	-0.573747	0.0799122	-0.493914	-0.0427418	-0.0626392	-0.0552597	-0.0603275	-0.444176	-0.53306	-0.573015	-0.328569	-0.0427418	0.103106	-0.063153	-0.124298	-0.00533295	-0.0551549	-0.463213	-0.378923	-0.0469589	-0.0638686	0.364988	-0.834358	-0.807771	-0.203158	-0.031456	-0.0766878	-0.0469589	-0.0280359	-0.031456	-0.00795174	-0.172491	-0.0680714	-0.0645555	-0.134478	-0.00795174	-0.0753956	-0.0642872	-0.00795174	-0.134478	-0.0218124	0.201982	0.362627	0.25136	-0.140587	-0.0427418
Positive_PH3_Mean_Stain_Area_MultiWaveScoring_EdU	na	0.0428867	-0.157838	-0.205759	0.0672474	-0.552286	0.449625	-0.164035	-0.0132523	-0.0913286	0.330635	0.34139	0.0726719	0.194811	-0.0821934	0.0192738	-0.0422008	-0.0712918	-0.0481644	-0.320837	-0.389635	-0.394815	-0.0132523	0.428564	0.249086	-0.415562	-0.175259	-0.0533997	-0.00641632	-0.0546251	-0.0178909	-0.0509487	-0.0132523	0.0774326	-0.0407771	-0.145983	0.0120394	0.00657844	-0.121378	-0.407457	0.109484	0.0233555	-0.0296497	-0.0606155	-0.263536	0.0488148	-0.0533848	0.037178	0.0288486
Positive_PH3_Mean_Stain_Area_MultiWaveScoring_cyto	na	-0.0371876	-0.202745	-0.614548	0.0951576	-0.319536	0.0078907	-0.00581551	0.0367298	0.0261688	0.1234	-0.165329	-0.261553	-0.296818	0.0078907	-0.0278969	-0.0678708	-0.00273132	0.0331898	-0.187383	-0.49506	-0.312456	-0.0346546	0.383891	0.272822	-0.861886	-0.886737	-0.024704	0.0331898	-0.00273132	-0.0190296	-0.0105438	-0.00767708	0.0155811	-0.141403	-0.0668373	0.0120087	-0.0278969	-0.0314503	0.123356	0.00421524	-0.261553	-0.303654	0.0189075	-0.123234	0.113956	0.104204	-0.0794544	-0.0371876
Positive_PH3_Mean_Stain_Aver_Intens_MultiWaveScoring_EdU	na	0.0367832	0.183487	-0.47599	0.228876	-0.503824	-0.29545	-0.623209	-0.0092926	0.00443268	-0.586685	-0.558876	-0.407877	-0.0368595	-0.0287266	-0.0247746	0.118363	0.0422745	0.0699615	-0.094463	-0.543329	-0.575724	-0.0379791	-0.335476	0.384224	-0.378652	-0.477415	0.0422745	0.0691071	-0.0193253	0.0699615	-0.0193253	-0.0092926	0.111124	-0.0746231	0.192255	0.212685	0.049921	0.151896	-0.110468	0.105707	0.0303135	0.392328	0.0699615	0.242426	0.204096	-0.407877	-0.0171051	0.0367832
Positive_PH3_Mean_Stain_Aver_Intens_MultiWaveScoring_cyto	na	0.0437775	-0.194263	-0.532472	0.0483551	-0.281204	-0.053421	-0.0478058	-0.0869637	-0.0629251	-0.50774	-0.586761	-0.603958	-0.261856	-0.0130157	0.0511627	0.0271835	-0.160964	-0.00835037	0.127583	-0.440811	-0.279984	-0.147755	-0.463956	0.214973	-0.850461	-0.834266	-0.160964	-0.103443	-0.0629251	-0.101734	-0.0629251	0.0675545	0.0437775	-0.133115	0.130508	-0.160964	-0.0301666	0.0138702	-0.162247	-0.0216217	0.0437775	0.0133209	-0.0359383	0.298843	0.214127	0.437698	-0.0217781	-0.015213
Positive_PH3_Mean_Stain_Integr_Intens_MultiWaveScoring_EdU	na	0.0152683	0.357307	-0.383541	0.218189	-0.610727	-0.0305271	-0.646738	0.00428009	-0.0347862	-0.283577	-0.330929	-0.194101	-0.0398445	-0.0498142	-0.049366	0.0742687	-0.0125694	0.0404129	-0.221125	-0.572559	-0.879648	-0.0247879	-0.0825273	0.403468	-0.609844	-0.642268	0.0216026	-0.0169754	-0.0407677	0.0404129	-0.0407677	-0.0169754	0.0326023	-0.147091	0.0219002	0.0914268	0.0641365	0.0312595	-0.429005	0.110889	0.0312595	0.42046	-0.0169754	-0.030201	0.13921	-0.213755	0.0404129	-0.00147438
Positive_PH3_Mean_Stain_Integr_Intens_MultiWaveScoring_cyto	na	-0.0162735	-0.365582	-0.567042	0.0975342	-0.481117	-0.0611954	-0.0840225	-0.0221977	-0.0270905	-0.534161	-0.505338	-0.584145	-0.316895	-0.0611954	0.060791	-0.0276302	-0.0615268	-0.0221977	-0.0393277	-0.492188	-0.399574	-0.0221977	-0.0867682	0.33616	-0.835108	-0.810114	-0.194983	-0.0392876	-0.07562	-0.145	-0.0270905	0.0307426	0.0201797	-0.227091	0.060791	-0.0615268	-0.112915	-0.0162735	-0.128906	-0.052002	-0.0840225	-0.102783	0.0145073	0.210449	0.32251	0.237465	-0.0917778	-0.0611954
Positive_PH3_MultiWaveScoring_EdU	na	0.0926056	-0.823191	-0.762798	-0.776926	-0.741043	0.411697	-0.741043	0.110788	0.066021	0.426761	0.555767	0.56282	0.284861	0.0363312	0.0844212	-0.160834	0.0315971	0.0918674	-0.167922	0.355702	-0.412918	0.173166	0.536168	-0.828395	-0.831418	-0.821939	0.0315971	0.177683	0.130108	0.0918674	-0.0213432	0.170359	-0.0164337	-0.762798	-0.089304	-0.115093	-0.379221	-0.282669	0.36091	-0.305735	-0.0219269	-0.550852	0.104197	-0.550852	-0.358225	0.0940704	0.0619602	0.098587
Positive_PH3_MultiWaveScoring_cyto	na	0.0204144	-0.779423	-0.671223	-0.580582	-0.404448	0.0165081	0.0705853	0.107059	0.106892	0.372793	0.374836	0.627104	0.538101	0.0204144	0.0435944	-0.0165636	0.0775948	0.069828	-0.0995111	0.250748	-0.404448	0.0877724	0.485117	-0.733033	-0.54171	-0.364578	0.185261	0.015873	0.106892	0.0465126	0.198933	0.157108	0.0705853	-0.671223	0.0505524	-0.00642777	-0.102554	-0.0138226	0.0415192	0.0505524	0.0204144	-0.151749	0.220585	-0.00953674	-0.0404205	-0.404448	0.143436	0.0705853
Positive_TUBULIN_Mean_Cell_Aver_Intens_MultiWaveScoring_cyto	na	0.174431	0.0762153	0.0462418	0.746155	-0.0831223	-0.0831223	-0.140251	0.167484	0.221779	0.0762153	0.176125	-0.140251	-0.0161743	-0.0831223	-6.1e-05	0.0296142	0.474776	0.0954861	0.021345	-0.252014	-0.531853	0.167484	0.0977917	0.0701347	0.00373529	-0.0251815	0.325905	0.0881944	0.371803	0.15915	0.383034	0.15915	0.174431	-0.32029	-6.1e-05	-0.0278091	-6.1e-05	0.0662766	0.0894165	-6.1e-05	-0.140251	-6.1e-05	0.147692	-6.1e-05	-6.1e-05	-0.140251	0.15915	-0.0831223
Positive_TUBULIN_Mean_Cyto_Aver_Intens_MultiWaveScoring_cyto	na	0.174059	0.133236	0.220711	0.682678	-0.0915394	-0.0915394	-0.140856	0.233451	0.262215	0.0431626	0.11158	-0.0816517	-6.1e-05	-0.0915394	-6.1e-05	-0.00662854	0.418356	0.0980952	0.053095	-0.252014	-0.522692	0.231	0.0549917	0.0668791	0.0341118	0.0166832	0.365242	0.142274	0.387093	0.231	0.388557	0.231	0.174059	-0.345467	-6.1e-05	-0.0524979	-6.1e-05	0.106554	0.0894165	-6.1e-05	-0.140856	-6.1e-05	0.133236	-6.1e-05	-6.1e-05	-0.140856	0.231	0.0652943
Positive_TUBULIN_Mean_Nucl_Aver_Intens_MultiWaveScoring_cyto	na	0.0637989	-0.191144	-0.0375748	0.724869	0.0637989	-0.0711231	-0.0711231	0.142124	0.102516	0.335292	0.39817	-0.0711231	-0.00123596	-0.0711231	-0.00123596	0.10153	0.493507	0.0524183	-3.11e-05	-0.00123596	-0.0711231	0.0816462	0.308827	0.00145363	-0.032892	-3.11e-05	0.102516	0.0524183	0.182594	0.0524183	0.391701	0.142124	0.0637989	-0.0685806	0.21608	-0.0375748	-0.00123596	0.0637989	0.0461578	-0.00123596	-0.0711231	-0.00123596	0.0524183	-0.00123596	-0.00123596	-0.00496101	0.142124	0.0637989
Positive_TUBULIN_Mean_Nucl_Integr_Intens_MultiWaveScoring_cyto	na	0.0202103	0.395086	0.586987	0.689022	0.461983	-0.0897903	-0.155464	-0.0291195	-0.0464592	0.489447	0.532543	0.0595169	-0.0317955	-0.0897903	-0.0317955	0.0137329	0.115795	0.057806	-0.091236	-0.320858	-0.234932	0.057806	0.543016	0.556466	0.151428	0.319473	-0.0122795	-0.031683	-0.0122795	-0.0654964	0.0972404	0.057806	0.0202103	-0.188793	0.103573	-0.0464592	-0.0317955	0.0983353	0.0658531	0.00518417	-0.0121536	-0.0317955	-0.0654964	-0.0317955	0.204647	0.309029	-0.031683	-0.0897903
Positive_TUBULIN_Mean_Stain_Aver_Intens_MultiWaveScoring_cyto	na	0.172043	0.0435602	0.0843716	0.746155	-0.0851288	-0.0851288	-0.142258	0.175178	0.248434	0.0846447	0.199728	-0.0811005	-0.0161743	-0.0851288	-6.1e-05	0.0348906	0.479011	0.105509	0.0464728	-0.252014	-0.531418	0.175178	0.127642	0.0521994	0.00514034	-0.0375791	0.334982	0.0950308	0.378073	0.170031	0.38796	0.170031	0.172043	-0.24526	-6.1e-05	-0.0252895	-6.1e-05	0.103439	0.0894165	-6.1e-05	-0.142258	-6.1e-05	0.156979	-6.1e-05	-6.1e-05	-0.142258	0.170031	-0.0851288
Positive_TUBULIN_MultiWaveScoring_cyto	na	0.144385	-0.0747464	-0.109585	-0.182276	-0.140432	0.28648	0.200083	0.222112	0.215542	-0.0936496	-0.0998192	-0.195794	-0.141161	0.299777	0.258226	-0.131649	0.182217	0.241413	0.119552	-0.306571	-0.369722	0.246958	-0.0833644	-0.199692	-0.417386	-0.310316	0.309292	0.190586	0.359219	0.38213	0.248501	0.372816	0.0976934	-0.232143	-0.182276	0.152065	0.106786	0.0977547	0.0806216	-0.141161	-0.138441	-0.117723	0.257099	-0.0415591	-0.254856	-0.277565	0.203147	0.204372
Shape_factor_IMA_Summary_cyto	na	-0.0201931	-0.452824	-0.213013	-0.363373	-0.0201931	0.0542507	-0.0201931	-0.144718	-0.0610352	-0.36591	-0.213013	-0.044241	9.16e-05	0.128103	9.16e-05	-0.369994	-0.0161133	-0.0756264	0.00116776	9.16e-05	0.160086	-0.249943	-0.0668136	-0.544861	-0.0912557	-0.334315	-0.02771	-0.171207	-0.0804443	-0.263737	-0.0610352	-0.192814	-0.000295639	0.400391	9.16e-05	-0.326172	-0.363373	-0.484426	-0.0205994	9.16e-05	0.128103	9.16e-05	-0.0293617	9.16e-05	-0.363373	-0.303885	-0.075016	-0.000295639
Texture_Index_Transfluor_EdU	na	0.502182	-0.758078	-0.728281	-0.835405	-0.718491	-0.472397	-0.434555	0.346823	0.468271	-0.455465	-0.483652	-0.478256	-0.835405	0.221542	0.550615	-0.390765	0.370249	0.363913	-0.423857	-0.835405	-0.718491	0.380026	-0.394657	-0.745199	-0.759138	-0.75282	0.376474	0.433493	0.18458	0.379904	0.41395	0.379904	0.349404	-0.37916	-0.582964	-0.415903	-0.582964	-0.355698	0.580089	-0.582964	-0.376205	-0.615435	0.30007	-0.701982	-0.835405	-0.426987	0.433493	-0.290878
Texture_Index_Transfluor_cyto	na	-0.00147438	-0.193583	0.0243359	0.837748	-0.00147438	-0.00147438	-0.00147438	0.117419	0.201216	0.177774	0.341719	-0.00147438	-0.0325718	-0.00147438	-0.0325718	0.0064937	0.219893	0.204858	0.0278236	-0.0325718	-0.00147438	0.161812	0.37051	0.00778463	-0.00244795	0.00972234	0.201216	0.0445634	0.269819	0.0555315	0.450972	0.206052	-0.00147438	-0.23271	0.244364	0.0278759	-0.0325718	-0.00147438	0.607279	0.186869	-0.00147438	-0.000833511	0.133871	0.0159702	0.0779819	-0.00147438	0.190887	-0.00147438
Total_Cells_Micronuclei_EdU	na	0.0704288	-0.275358	-0.119088	-0.202223	-0.145502	-0.376581	-0.296259	0.162809	0.182997	-0.406096	-0.331465	-0.157099	-0.123731	0.157343	0.115336	-0.0757453	0.146968	0.207731	-0.0666087	-0.3737	-0.368525	0.0595379	-0.119554	-0.388676	-0.461674	-0.468032	0.221722	0.241545	0.269271	0.157804	0.186735	0.103117	0.053339	-0.159437	-0.30207	0.186735	-0.0763041	-0.0622501	0.193951	-0.0674193	-0.0766544	-0.144319	0.18405	-0.38764	-0.288743	-0.233759	0.199064	0.222773
Total_Cells_Micronuclei_cyto	na	0.145364	-0.20219	-0.102757	-0.262379	-0.194506	0.307006	0.17545	0.187239	0.294651	-0.0623922	-0.0564919	-0.209764	0.181925	0.244476	0.248469	-0.12386	0.1572	0.204764	0.11412	-0.234836	-0.415462	0.204764	0.0701442	-0.293951	-0.478285	-0.324298	0.294651	0.236534	0.330296	0.308379	0.273411	0.236534	0.064206	-0.181004	-0.18554	0.201267	-0.0542291	-0.0763383	0.1735	-0.13217	0.162735	0.181925	0.308379	0.0344375	-0.0860919	-0.192852	0.299555	0.290891
Total_Cells_MultiWaveScoring_EdU	na	0.16436	-0.28264	-0.17236	-0.24826	-0.336327	-0.43072	-0.352044	0.230028	0.238536	-0.318285	-0.279468	-0.216259	-0.143603	0.183723	0.157697	-0.22308	0.189762	0.31621	-0.121777	-0.432268	-0.386817	0.181566	-0.114715	-0.305906	-0.472364	-0.381746	0.210656	0.283373	0.253794	0.257494	0.238536	0.17412	0.0550155	-0.280264	-0.314682	0.162127	-0.0446757	-0.105598	0.200374	-0.0845654	-0.190065	-0.247678	0.257494	-0.387844	-0.339192	-0.296958	0.155077	0.195242
Total_Cells_MultiWaveScoring_cyto	na	0.111347	-0.075027	-0.107552	-0.188298	-0.144098	0.239962	0.156844	0.223373	0.219856	-0.0912341	-0.102425	-0.199491	-0.182722	0.349491	0.268414	-0.11407	0.185677	0.241571	0.0808606	-0.305424	-0.365085	0.248342	-0.0819531	-0.194795	-0.414655	-0.290201	0.314827	0.191724	0.363899	0.384862	0.253304	0.373587	0.0978668	-0.228035	-0.151349	0.150398	0.0717539	0.115728	0.132477	-0.140994	-0.107487	-0.101595	0.258973	-0.0238372	-0.229076	-0.248418	0.204408	0.225716
Total_area_IMA_Summary_EdU	na	-0.0429611	0.541841	0.55838	0.398823	0.586418	0.608025	0.598381	-0.0727386	-0.10379	0.122299	0.112579	0.0107346	0.0954781	0.0153732	-0.0769234	-0.209718	0.109161	-0.204819	-0.489187	-0.484638	-0.626701	-0.123154	0.141943	0.558208	0.49906	0.576868	-0.0908508	-0.204819	-0.223419	-0.204819	-0.0908508	-0.205063	0.0373459	-0.10379	-0.353046	-0.0908508	0.0312691	-0.0429611	-0.274677	0.215473	0.0107346	-0.353046	-0.123154	-0.315693	0.368671	0.486565	-0.0535736	-0.0135422
Total_area_IMA_Summary_cyto	na	-0.0559139	0.515305	0.677108	0.433189	0.558233	-0.0882626	-0.122076	-0.0894012	-0.0687504	0.0947723	0.0448246	0.0710506	0.0962753	-0.0856991	-0.0970078	-0.0129476	-0.143091	-0.0740204	-0.205822	-0.446251	-0.276251	-0.104904	0.384388	0.441799	0.586364	0.515497	-0.241236	-0.104904	-0.241236	-0.104904	-0.152491	-0.260422	-0.00281334	-0.205347	-0.155235	-0.0949955	0.022789	0.0278378	0.022789	0.149498	0.0710506	-0.14315	-0.167038	-0.24044	0.43795	0.535772	-0.104904	-0.122076
Total_intensity_IMA_Summary_EdU	na	0	0.563309	0.546137	0.251062	0	0.25	0	-0.0596199	0.0297794	0.874561	0.580683	0	0.306116	0	-0.0706425	-0.0813004	0.022089	-0.0596199	-0.11147	0.306116	0	-0.0681648	0.476067	0.654744	0.600553	0.459615	0.0297794	-0.0681648	-0.234858	-0.10796	-0.0339298	-0.10796	0	0.0007267	0.306116	0.0297794	-0.0234013	0	-0.149134	0.251062	0	-0.0234013	-0.0596199	0.194422	0.509974	0	-0.0197029	0
Total_intensity_IMA_Summary_cyto	na	0.0529194	0.58123	0.383501	0.127834	0.0529194	-0.0184956	-0.125917	-0.0380173	-0.0575733	0.838066	0.433428	0.0508442	-0.0311546	-0.0481586	-0.236721	0.0204859	-0.0575733	0.0562057	-0.031799	0.115627	0.140444	0.0562057	0.397848	0.486498	0.552573	0.401562	-0.0575733	0.0709763	-0.0575733	-0.0658493	-0.0395069	-0.0380173	0.0508442	-0.0338917	0.202297	-0.0329151	-0.0311546	0.0529194	-0.0714378	0.00844955	-0.0184956	-0.138454	0.199394	-0.236721	0.491116	0.232119	0.0562057	-0.0200825
Width_IMA_Summary_EdU	na	0.00063324	0.72304	0.713806	0.168522	0.377098	0.390038	0.778221	-0.0119801	0.00970459	0.0460377	0.0592651	0.071434	0.142765	-0.0548325	-0.0265541	-0.0141039	0.0592651	-0.0328541	-0.297889	-0.481876	-0.595848	-0.0119801	0.133252	0.604741	0.35175	0.605053	-0.0317993	-0.0119801	-0.085144	-0.0328541	-0.0317993	-0.0849781	0.0204086	-0.0317993	-0.136051	0.0592651	0.00873184	0.00063324	-0.125797	0.142765	0.00063324	-0.369328	-0.0328541	-0.288761	0.142765	0.100975	0.022356	-0.0548325
[truncated: 351 more columns]

## Sheet: compound_classes.cls
399	75	1
#	bioactive_lipid	Inhibits_DNA_synthesis	retinoid_receptor_ligand	prostaglandin	HSP-90_inhibitor	IP3_receptor_blocker	cannabinoid_receptor_ligand	Vitamin_D_receptor_ligand	ER_Ca++_ATPase_inhibitor	protease_inhibitor	kinase_inhibitor	Calcium_ionophore	Potassium_channels	farnesylation_inhibitor	Inhibits_transcription	ionophore	PARP_inhibitor	ADP_ribose_polymerase_inhibitor	Calcium_channels	inhibits_protein_synthesis	phospholipase_inhibitor	PPAR_ligand	lipoxygenase_inhibitor	vacuolar_ATPase_inhibitor	myosin_II_inhibitor	ARF_GEF_inhibitor	NOS_inhibitor	PKA_activator_	antioxidant	inhibitor_of_mitochondrial_Na+Ca+2_exchange	phosphatase_inhibitor	vanilloid_receptor_ligand	Fatty_acid_biosynthesis_inhibitor	dopamine_antagonist	NFkappaB_inhibitor	integrin_inhibitor	prolyl_cis-trans_isomerase_inhibitor	calcineurin_inhibitor	actin_poison	inhibits_mitochondrial_permeability_pore_opening_	steroid_hormone	phosphodiesterase_inhibitor	calmodulin_inhibitor	microtubule_poison	mitochondrial_uncoupler	Misc._channels	NO_donor	Bcl-2_ligand	iron_chelator
bioactive_lipid	Inhibits_DNA_synthesis	Inhibits_DNA_synthesis	Inhibits_DNA_synthesis	Inhibits_DNA_synthesis	bioactive_lipid	retinoid_receptor_ligand	bioactive_lipid	prostaglandin	HSP-90_inhibitor	HSP-90_inhibitor	HSP-90_inhibitor	HSP-90_inhibitor	bioactive_lipid	bioactive_lipid	IP3_receptor_blocker	cannabinoid_receptor_ligand	Vitamin_D_receptor_ligand	ER_Ca++_ATPase_inhibitor	protease_inhibitor	protease_inhibitor	bioactive_lipid	kinase_inhibitor	kinase_inhibitor	kinase_inhibitor	kinase_inhibitor	bioactive_lipid	bioactive_lipid	bioactive_lipid	bioactive_lipid	bioactive_lipid	prostaglandin	bioactive_lipid	Calcium_ionophore	kinase_inhibitor	kinase_inhibitor	kinase_inhibitor	kinase_inhibitor	kinase_inhibitor	kinase_inhibitor	kinase_inhibitor	kinase_inhibitor	kinase_inhibitor	Potassium_channels	protease_inhibitor	protease_inhibitor	farnesylation_inhibitor	farnesylation_inhibitor	Inhibits_transcription	Inhibits_transcription
[truncated: 349 more columns]

## Sheet: feature_categories.gmt
EdU_and_pH3_combined	na	Pct_ProbeAB_Positive_Cells_Micronuclei_EdU
EdU_area	na	All_EdU_Mean_Nucl_Integr_Intens_MultiWaveScoring_EdU	All_EdU_Mean_Stain_Area_MultiWaveScoring_EdU	Area_IMA_Summary_EdU	Breadth_IMA_Summary_EdU	Negative_EdU_Mean_Stain_Area_MultiWaveScoring_EdU	Pct_Positive_EdU_MultiWaveScoring_EdU	Pct_ProbeA_Positive_Cells_Micronuclei_EdU	Positive_EdU_Mean_Cell_Aver_Intens_MultiWaveScoring_EdU	Positive_EdU_Mean_Stain_Area_MultiWaveScoring_EdU	Positive_EdU_Mean_Stain_Aver_Intens_MultiWaveScoring_EdU	Total_area_IMA_Summary_EdU
EdU_foci	na	Pit_Area_Per_Cell_Transfluor_cyto	Pit_Average_Intensity_Transfluor_EdU	Pit_Count_Transfluor_EdU	Pit_Integrated_Intensity_Transfluor_EdU
EdU_intensity	na	All_EdU_Mean_Cell_Aver_Intens_MultiWaveScoring_EdU	All_EdU_Mean_Cell_Integr_Intens_MultiWaveScoring_EdU	All_EdU_Mean_Nucl_Aver_Intens_MultiWaveScoring_EdU	All_EdU_Mean_Stain_Aver_Intens_MultiWaveScoring_EdU	All_EdU_Mean_Stain_Integr_Intens_MultiWaveScoring_EdU	Average_intensity_IMA_Summary_EdU	Negative_EdU_Mean_Cell_Integr_Intens_MultiWaveScoring_EdU	Negative_EdU_Mean_Nucl_Integr_Intens_MultiWaveScoring_EdU	Negative_EdU_Mean_Stain_Aver_Intens_MultiWaveScoring_EdU	Negative_EdU_Mean_Stain_Integr_Intens_MultiWaveScoring_EdU	Positive_EdU_Mean_Cell_Integr_Intens_MultiWaveScoring_EdU	Positive_EdU_Mean_Nucl_Aver_Intens_MultiWaveScoring_EdU	Positive_EdU_Mean_Nucl_Integr_Intens_MultiWaveScoring_EdU	Positive_EdU_Mean_Stain_Integr_Intens_MultiWaveScoring_EdU	Positive_EdU_MultiWaveScoring_EdU
Edu_area_shape	na	Width_IMA_Summary_EdU
actin_intensity	na	All_ACTIN_Mean_Cyto_Aver_Intens_MultiWaveScoring_cyto	All_ACTIN_Mean_Nucl_Integr_Intens_MultiWaveScoring_cyto	All_ACTIN_Mean_Stain_Area_MultiWaveScoring_cyto	All_ACTIN_Mean_Stain_Integr_Intens_MultiWaveScoring_cyto	Negative_ACTIN_Mean_Nucl_Integr_Intens_MultiWaveScoring_cyto	Negative_ACTIN_Mean_Stain_Area_MultiWaveScoring_cyto	Negative_ACTIN_Mean_Stain_Aver_Intens_MultiWaveScoring_cyto	Negative_ACTIN_Mean_Stain_Integr_Intens_MultiWaveScoring_cyto	Positive_ACTIN_Mean_Stain_Integr_Intens_MultiWaveScoring_cyto
actin_localization	na	Negative_ACTIN_Mean_Cell_Aver_Intens_MultiWaveScoring_cyto	Negative_ACTIN_Mean_Cyto_Aver_Intens_MultiWaveScoring_cyto	Negative_ACTIN_Mean_Nucl_Aver_Intens_MultiWaveScoring_cyto	Positive_ACTIN_Mean_Cell_Aver_Intens_MultiWaveScoring_cyto	Positive_ACTIN_Mean_Cyto_Aver_Intens_MultiWaveScoring_cyto	Positive_ACTIN_Mean_Nucl_Aver_Intens_MultiWaveScoring_cyto	Positive_ACTIN_Mean_Nucl_Integr_Intens_MultiWaveScoring_cyto	Positive_ACTIN_Mean_Stain_Area_MultiWaveScoring_cyto	Positive_ACTIN_MultiWaveScoring_cyto
binucleated_cells	na	Binucleated_Cells_Micronuclei_EdU	Binucleated_Cells_Micronuclei_cyto	DNA_Total_Area_Micronuclei_cyto	DualMono_cell_ratio_Micronuclei_EdU	DualMono_cell_ratio_Micronuclei_cyto	Mononucleated_Cells_Micronuclei_EdU	Mononucleated_Cells_Micronuclei_cyto	MultiDualMono_cell_ratio_Micronuclei_EdU	MultiDualMono_cell_ratio_Micronuclei_cyto	MultiMono_cell_ratio_Micronuclei_EdU	MultiMono_cell_ratio_Micronuclei_cyto	Multinucleated_Cells_Micronuclei_EdU	Multinucleated_Cells_Micronuclei_cyto	Nuclear_Division_Index_Micronuclei_EdU	Pct_Binucleated_Cells_Micronuclei_EdU	Pct_Binucleated_Cells_Micronuclei_cyto	Pct_Multinucleated_Cells_Micronuclei_EdU
cell_area_shape	na	All_Cells_Mean_Area_MultiWaveScoring_EdU	Breadth_IMA_Summary_cyto	Equiv_oblate_vol_IMA_Summary_EdU	Equiv_oblate_vol_IMA_Summary_cyto	Equiv_prolate_vol_IMA_Summary_EdU	Equiv_prolate_vol_IMA_Summary_cyto	Outer_radius_IMA_Summary_EdU	Outer_radius_IMA_Summary_cyto	Shape_factor_IMA_Summary_cyto
cell_count	na	Nuclear_Count_Transfluor_EdU	Total_Cells_Micronuclei_EdU	Total_Cells_Micronuclei_cyto	Total_Cells_MultiWaveScoring_EdU	Total_Cells_MultiWaveScoring_cyto
fluctuation_gradient_measurements	na	Cellular_Gradient_Index_Transfluor_EdU	Cellular_Gradient_Index_Transfluor_cyto	Cellular_Laplacian_Index_Transfluor_EdU	Cellular_Texture_Index_Transfluor_EdU	Gradient_Index_Transfluor_EdU	Gradient_Index_Transfluor_cyto	Laplacian_Index_Transfluor_EdU	Laplacian_Index_Transfluor_cyto	Texture_Index_Transfluor_EdU	Texture_Index_Transfluor_cyto
interphase_count	na	Interphase_Cells_Micronuclei_EdU	Interphase_Cells_Micronuclei_cyto
micronuclei	na	Cells_with_one_micronucleus_Micronuclei_EdU
mitotic_index	na	Mitotic_Cells_Micronuclei_EdU	Mitotic_Cells_Micronuclei_cyto	Pct_Mitotic_Cells_Micronuclei_EdU	Pct_Positive_PH3_MultiWaveScoring_EdU	Pct_Positive_PH3_MultiWaveScoring_cyto
nuclear_area_shape	na	All_Nuclei_Mean_Area_MultiWaveScoring_EdU	All_Nuclei_Mean_Area_MultiWaveScoring_cyto	All_Nuclei_Mean_Average_Itensity_MultiWaveScoring_EdU	All_Nuclei_Mean_Average_Itensity_MultiWaveScoring_cyto	All_Nuclei_Mean_Integr_Itensity_MultiWaveScoring_EdU	All_Nuclei_Mean_Integr_Itensity_MultiWaveScoring_cyto	Area_IMA_Summary_cyto	Average_intensity_IMA_Summary_cyto	DNA_Mean_Area_Micronuclei_EdU	DNA_Mean_Area_Micronuclei_cyto	DNA_Total_Area_Micronuclei_EdU	Ell_form_factor_IMA_Summary_EdU	Ell_form_factor_IMA_Summary_cyto	Equiv_radius_IMA_Summary_EdU	Equiv_radius_IMA_Summary_cyto	Equiv_sphere_surface_area_IMA_Summary_EdU	Equiv_sphere_surface_area_IMA_Summary_cyto	Equiv_sphere_vol_IMA_Summary_EdU	Equiv_sphere_vol_IMA_Summary_cyto	Inner_radius_IMA_Summary_EdU	Inner_radius_IMA_Summary_cyto	Length_IMA_Summary_EdU	Length_IMA_Summary_cyto	Mean_radius_IMA_Summary_EdU	Mean_radius_IMA_Summary_cyto	Nuclear_Area_Per_Cell_Transfluor_EdU	Nuclear_Total_Area_Transfluor_EdU	Pct_ProbeB_Positive_Cells_Micronuclei_EdU	Perimeter_IMA_Summary_EdU	Pixel_area_IMA_Summary_cyto	Total_area_IMA_Summary_cyto
nuclear_intensity	na	Nuclear_Average_Intensity_Transfluor_EdU	Nuclear_Integrated_Intensity_Transfluor_EdU	Pixel_area_IMA_Summary_EdU	Total_intensity_IMA_Summary_EdU	Total_intensity_IMA_Summary_cyto
pH3_area	na	All_PH3_Mean_Stain_Area_MultiWaveScoring_EdU	All_PH3_Mean_Stain_Area_MultiWaveScoring_cyto	Negative_PH3_Mean_Stain_Area_MultiWaveScoring_EdU	Negative_PH3_Mean_Stain_Area_MultiWaveScoring_cyto
pH3_intensity	na	All_PH3_Mean_Cell_Aver_Intens_MultiWaveScoring_EdU	All_PH3_Mean_Cell_Integr_Intens_MultiWaveScoring_EdU	All_PH3_Mean_Nucl_Aver_Intens_MultiWaveScoring_EdU	All_PH3_Mean_Nucl_Integr_Intens_MultiWaveScoring_EdU	All_PH3_Mean_Nucl_Integr_Intens_MultiWaveScoring_cyto	All_PH3_Mean_Stain_Aver_Intens_MultiWaveScoring_EdU	All_PH3_Mean_Stain_Aver_Intens_MultiWaveScoring_cyto	All_PH3_Mean_Stain_Integr_Intens_MultiWaveScoring_EdU	All_PH3_Mean_Stain_Integr_Intens_MultiWaveScoring_cyto	Negative_PH3_Mean_Cell_Integr_Intens_MultiWaveScoring_EdU	Negative_PH3_Mean_Nucl_Integr_Intens_MultiWaveScoring_EdU	Negative_PH3_Mean_Stain_Aver_Intens_MultiWaveScoring_EdU	Negative_PH3_Mean_Stain_Aver_Intens_MultiWaveScoring_cyto
pH3_intensity_large_areas	na	Positive_PH3_Mean_Cell_Aver_Intens_MultiWaveScoring_EdU	Positive_PH3_Mean_Cell_Aver_Intens_MultiWaveScoring_cyto	Positive_PH3_Mean_Cell_Integr_Intens_MultiWaveScoring_EdU	Positive_PH3_Mean_Cyto_Aver_Intens_MultiWaveScoring_cyto	Positive_PH3_Mean_Nucl_Aver_Intens_MultiWaveScoring_EdU	Positive_PH3_Mean_Nucl_Aver_Intens_MultiWaveScoring_cyto	Positive_PH3_Mean_Nucl_Integr_Intens_MultiWaveScoring_EdU	Positive_PH3_Mean_Nucl_Integr_Intens_MultiWaveScoring_cyto	Positive_PH3_Mean_Stain_Area_MultiWaveScoring_EdU	Positive_PH3_Mean_Stain_Area_MultiWaveScoring_cyto	Positive_PH3_Mean_Stain_Aver_Intens_MultiWaveScoring_EdU	Positive_PH3_Mean_Stain_Aver_Intens_MultiWaveScoring_cyto	Positive_PH3_Mean_Stain_Integr_Intens_MultiWaveScoring_EdU	Positive_PH3_Mean_Stain_Integr_Intens_MultiWaveScoring_cyto	Positive_PH3_MultiWaveScoring_EdU	Positive_PH3_MultiWaveScoring_cyto
tubulin_foci_1_4_nm	na	Perimeter_IMA_Summary_cyto	Pit_Average_Intensity_Transfluor_cyto	Pit_Count_Transfluor_cyto	Pit_Integrated_Intensity_Transfluor_cyto	Pit_Total_Area_Transfluor_EdU	Pit_Total_Area_Transfluor_cyto
tubulin_intensity	na	All_TUBULIN_Mean_Cell_Aver_Intens_MultiWaveScoring_cyto	All_TUBULIN_Mean_Cyto_Aver_Intens_MultiWaveScoring_cyto	All_TUBULIN_Mean_Stain_Aver_Intens_MultiWaveScoring_cyto	Negative_TUBULIN_Mean_Cell_Aver_Intens_MultiWaveScoring_cyto	Negative_TUBULIN_Mean_Cell_Integr_Intens_MultiWaveScoring_cyto	Negative_TUBULIN_Mean_Cyto_Aver_Intens_MultiWaveScoring_cyto	Negative_TUBULIN_Mean_Nucl_Aver_Intens_MultiWaveScoring_cyto	Negative_TUBULIN_Mean_Nucl_Integr_Intens_MultiWaveScoring_cyto	Negative_TUBULIN_Mean_Stain_Aver_Intens_MultiWaveScoring_cyto	Negative_TUBULIN_Mean_Stain_Integr_Intens_MultiWaveScoring_cyto	Pct_Positive_TUBULIN_MultiWaveScoring_cyto
tubulin_intensity_large_areas	na	Positive_TUBULIN_Mean_Cell_Aver_Intens_MultiWaveScoring_cyto	Positive_TUBULIN_Mean_Cyto_Aver_Intens_MultiWaveScoring_cyto	Positive_TUBULIN_Mean_Nucl_Aver_Intens_MultiWaveScoring_cyto	Positive_TUBULIN_Mean_Nucl_Integr_Intens_MultiWaveScoring_cyto	Positive_TUBULIN_Mean_Stain_Aver_Intens_MultiWaveScoring_cyto	Positive_TUBULIN_MultiWaveScoring_cyto
tubulin_localization	na	All_TUBULIN_Mean_Nucl_Aver_Intens_MultiWaveScoring_cyto	All_TUBULIN_Mean_Nucl_Integr_Intens_MultiWaveScoring_cyto	Negative_TUBULIN_Mean_Stain_Area_MultiWaveScoring_cyto
