# Supplementary material for: Large-scale cytological profiling for functional analysis of bioactive compounds
Source: Royal Society of Chemistry journal article supplement (doi:10.1039/c3mb70245f), 2013-08-20
Supplement: c3mb70245f_3.pdf [file c3mb70245f_3.pdf]

Supplemental Information.

## **Large-scale cytological profiling uncovers novel functions for hundreds of compounds**

Marcos H. Woehrmann, Walter M. Bray, James K. Durbin, Sean C. Nisam, Alicia K. Michael, Emerson Glassey, Joshua M. Stuart, R. Scott Lokey

Inventory of Supplemental Information.

**Figure S1.** High-resolution heat map of cytological profiles clustered by similarity (Euclidean distance, average linkage). Related to Figure 2.

**Table S1.** Cytological profiling data (as HD scores) for 399 compound-dose instances after eliminating instances due to weak phenotypes and toxicity. List of cytological features, their corresponding feature categories, compounds, and corresponding compound classes. Related to Figure 2.

**Table S2.** Data used for input into GSEA analysis. Sheet 1: Cytological profiling data for input into GSEA (.gct file). Sheet 2: Compound classes (.cls file). Sheet 3: Cytological feature categories (.gmt file). Related to Figure 3.

**Figure S2.** Chart showing compound-dose instances rank ordered by phenotypic vector magnitude, showing elimination of weak phenotypes and toxic instances. Related to Figure 5.

**Table S3.** Mode of Action Activity Rank (MAR) scores. Related to Figure 6.
