# Supplementary material for: Large-scale cytological profiling for functional analysis of bioactive compounds
Source: Royal Society of Chemistry journal article supplement (doi:10.1039/c3mb70245f), 2013-08-20
Supplement: c3mb70245f_3.xlsx [file c3mb70245f_3.xlsx]

## Sheet: mar
Table S3. Mode-of-action activity rank scores to measure the extent to which a compound’s fingerprint was similar to other compounds in its own classrelative to compounds of a different class (see Methods).
	MAR score				Classes whose centroids are nearest that of compound in Column A in order of increasing distance
actin poison	0.93
Cytochalasin D - actin poison_0.0788	0.4				hif-1 inhibitor	kinase inhibitor	misc. channels	inhibits mitochondrial permeability pore opening	phosphodiesterase inhibitor	ppar ligand	farnesylation inhibitor	phospholipase inhibitor	parp inhibitor
Cytochalasin D - actin poison_0.394	0.99				phosphatase inhibitor	actin poison	protein glycosylation inhibitor	calcium channels	farnesylation inhibitor	calmodulin inhibitor	phospholipase inhibitor	kinase inhibitor	potassium channels
Cytochalasin B - actin poison_10.4	1				actin poison	calmodulin inhibitor	inhibitor of mitochondrial na+ca+2 exchange	no donor	calcium channels	fatty acid biosynthesis inhibitor	nfkappab inhibitor	phosphatase inhibitor	myosin ii inhibitor
Cytochalasin B - actin poison_2.09	1				actin poison	calmodulin inhibitor	calcium channels	protein glycosylation inhibitor	vanilloid receptor ligand	calcium ionophore	phosphatase inhibitor	arf gef inhibitor	antioxidant
Cytochalasin D - actin poison_1.97	1				actin poison	er ca++ atpase inhibitor	calmodulin inhibitor	n-wasp inhibitor	fatty acid biosynthesis inhibitor	protein glycosylation inhibitor	na+ ionophore	antioxidant	alpha adrenergic agonist
Cytochalasin D - actin poison_9.85	1				actin poison	calmodulin inhibitor	myosin ii inhibitor	vacuolar atpase inhibitor	protein glycosylation inhibitor	er ca++ atpase inhibitor	guanylate cyclase inhibitor	calcium ionophore	arf gef inhibitor
Latrunculin B - actin poison_0.506	1				actin poison	arf gef inhibitor	protein glycosylation inhibitor	integrin inhibitor	phosphatase inhibitor	vacuolar atpase inhibitor	phospholipase inhibitor	potassium channels	farnesylation inhibitor
Latrunculin B - actin poison_12.6	1				actin poison	calmodulin inhibitor	activates heterotrimeriuc gtpases	dopamine antagonist	calcium ionophore	na+ ionophore	protein glycosylation inhibitor	vacuolar atpase inhibitor	arf gef inhibitor
Latrunculin B - actin poison_2.53	1				actin poison	myosin ii inhibitor	sphingosine kinase inhibitor	protein glycosylation inhibitor	na+ ionophore	er ca++ atpase inhibitor	arf gef inhibitor	calmodulin inhibitor	n-wasp inhibitor
activates heterotrimeriuc gtpases	1
Mastoparan - activates heterotrimeriuc GTPases_2.96	1				activates heterotrimeriuc gtpases	dopamine antagonist	pin1 inhibitor	calmodulin inhibitor	calcium ionophore	guanylate cyclase inhibitor	lipoxygenase inhibitor	na+ ionophore	protein glycosylation inhibitor
adp ribose polymerase inhibitor	1
Aminobenzamide (3-ABA) [3-Aminobenzamide (3-ABA)] - ADP ribose polymerase inhibitor_0.294	1				adp ribose polymerase inhibitor	vitamin d receptor ligand	pka activator	prostaglandin	bioactive lipid	paf receptor ligand	cannabinoid receptor ligand	voltage-dependent na channel inhibitor	pkc activator
alpha adrenergic agonist	1
Prazocin - alpha adrenergic agonist_13.0	1				alpha adrenergic agonist	fatty acid biosynthesis inhibitor	calmodulin inhibitor	kinase inhibitor	calcium channels	antioxidant	mitochondrial uncoupler	actin poison	protease inhibitor
antioxidant	0.98
CAPE - antioxidant_3.52	0.97				ppar ligand	eg5 inhibitor	antioxidant	potassium channels	vanilloid receptor ligand	misc. channels	hsp-90 inhibitor	phospholipase inhibitor	paf receptor ligand
CAPE - antioxidant_17.6	0.99				lipoxygenase inhibitor	antioxidant	calmodulin inhibitor	dopamine antagonist	fatty acid biosynthesis inhibitor	induces intracellular acidification	calcium channels	mitochondrial uncoupler	na+ ionophore
ap-1 inhibitor	1
Tanshinone IIA - AP-1 inhibitor_0.679	1				ap-1 inhibitor	ppar ligand	kinase inhibitor	fo atp synthase inhibitor	hif-1 inhibitor	inhibits mitochondrial permeability pore opening	nos inhibitor	eg5 inhibitor	phosphatase inhibitor
Tanshinone IIA - AP-1 inhibitor_3.40	1				ap-1 inhibitor	protease inhibitor	bcl-2 ligand	fo atp synthase inhibitor	kinase inhibitor	inhibits protein synthesis	vanilloid receptor ligand	nos inhibitor	calcineurin inhibitor
arf gef inhibitor	1
Brefeldin A - ARF GEF inhibitor_0.143	1				arf gef inhibitor	vacuolar atpase inhibitor	protein glycosylation inhibitor	calcium ionophore	potassium channels	na+ ionophore	actin poison	er ca++ atpase inhibitor	calcium channels
Brefeldin A - ARF GEF inhibitor_0.713	1				arf gef inhibitor	vacuolar atpase inhibitor	protein glycosylation inhibitor	calcium ionophore	potassium channels	farnesylation inhibitor	sodium channels	phospholipase inhibitor	calcium channels
Brefeldin A - ARF GEF inhibitor_17.8	1				arf gef inhibitor	protein glycosylation inhibitor	na+ ionophore	calcium channels	dopamine antagonist	calcium ionophore	er ca++ atpase inhibitor	calmodulin inhibitor	myosin ii inhibitor
Brefeldin A - ARF GEF inhibitor_3.57	1				arf gef inhibitor	protein glycosylation inhibitor	vacuolar atpase inhibitor	na+ ionophore	er ca++ atpase inhibitor	n-wasp inhibitor	actin poison	calcium ionophore	sphingosine kinase inhibitor
bcl-2 ligand	1
HA14-1 - Bcl-2 ligand_2.44	1				bcl-2 ligand	protease inhibitor	fo atp synthase inhibitor	kinase inhibitor	nos inhibitor	ap-1 inhibitor	inhibits protein synthesis	dna binding	inhibits mitochondrial permeability pore opening
bioactive lipid	0.85
PCA 4248 - bioactive lipid_13.8	0.21				calmodulin inhibitor	dopamine antagonist	na+ ionophore	protein glycosylation inhibitor	mitochondrial uncoupler	prolyl cis-trans isomerase inhibitor	calcium channels	actin poison	fatty acid biosynthesis inhibitor
13(S)-HPODE - bioactive lipid_0.0200	0.42				retinoid receptor ligand	nos inhibitor	ppar ligand	ap-1 inhibitor	protease inhibitor	fo atp synthase inhibitor	kinase inhibitor	hsp-90 inhibitor	sirt1 activator
SQ-29548 - bioactive lipid_0.200	0.48				calcium channels	ppar ligand	sodium channels	phosphatase inhibitor	vanilloid receptor ligand	potassium channels	antioxidant	kinase inhibitor	farnesylation inhibitor
15-Ketoeicosatetraenoic acid - bioactive lipid_0.000800	0.95				adp ribose polymerase inhibitor	vitamin d receptor ligand	prostaglandin	pka activator	bioactive lipid	paf receptor ligand	cannabinoid receptor ligand	voltage-dependent na channel inhibitor	pkc activator
5(S)-HPETE - bioactive lipid_0.000800	0.95				adp ribose polymerase inhibitor	vitamin d receptor ligand	pka activator	prostaglandin	bioactive lipid	paf receptor ligand	cannabinoid receptor ligand	voltage-dependent na channel inhibitor	pkc activator
5;8;11-Eicosatriynoic acid - bioactive lipid_0.00800	0.95				vitamin d receptor ligand	adp ribose polymerase inhibitor	pka activator	prostaglandin	bioactive lipid	paf receptor ligand	cannabinoid receptor ligand	voltage-dependent na channel inhibitor	pkc activator
6-Formylindolo [3;2-B] carbazole - bioactive lipid_0.00800	0.95				adp ribose polymerase inhibitor	pka activator	vitamin d receptor ligand	prostaglandin	bioactive lipid	paf receptor ligand	cannabinoid receptor ligand	pkc activator	voltage-dependent na channel inhibitor
1-Octadecyl-2-methylglycero-3 PC - bioactive lipid_0.200	0.96				vitamin d receptor ligand	adp ribose polymerase inhibitor	pka activator	bioactive lipid	prostaglandin	cannabinoid receptor ligand	paf receptor ligand	voltage-dependent na channel inhibitor	pkc activator
5;6-Epoxyeicosatrienoic acid - bioactive lipid_0.00400	0.96				adp ribose polymerase inhibitor	vitamin d receptor ligand	prostaglandin	bioactive lipid	pka activator	paf receptor ligand	cannabinoid receptor ligand	voltage-dependent na channel inhibitor	pkc activator
6-Formylindolo [3;2-B] carbazole - bioactive lipid_0.0400	0.96				adp ribose polymerase inhibitor	vitamin d receptor ligand	prostaglandin	bioactive lipid	pka activator	paf receptor ligand	cannabinoid receptor ligand	pkc activator	potassium channels
17-Octadecynoic acid - bioactive lipid_1.00	0.97				vitamin d receptor ligand	adp ribose polymerase inhibitor	bioactive lipid	pka activator	prostaglandin	paf receptor ligand	cannabinoid receptor ligand	voltage-dependent na channel inhibitor	pkc activator
8;9-Epoxyeicosatrienoic acid - bioactive lipid_0.0200	0.97				adp ribose polymerase inhibitor	vitamin d receptor ligand	bioactive lipid	prostaglandin	pka activator	cannabinoid receptor ligand	paf receptor ligand	voltage-dependent na channel inhibitor	pkc activator
5;8;11-Eicosatriynoic acid - bioactive lipid_0.0400	0.99				pka activator	bioactive lipid	vitamin d receptor ligand	adp ribose polymerase inhibitor	prostaglandin	paf receptor ligand	cannabinoid receptor ligand	potassium channels	pkc activator
PCA 4248 - bioactive lipid_2.77	0.99				voltage-dependent na channel inhibitor	bioactive lipid	ppar ligand	misc. channels	phospholipase inhibitor	estrogen antagonist	cannabinoid receptor ligand	potassium channels	kinase inhibitor
17-Octadecynoic acid - bioactive lipid_0.200	1				bioactive lipid	vitamin d receptor ligand	adp ribose polymerase inhibitor	prostaglandin	pka activator	paf receptor ligand	cannabinoid receptor ligand	voltage-dependent na channel inhibitor	misc. channels
bnos/nos inhibitor	1
TRIM - bNOS/NOS inhibitor_23.6	1				bnos/nos inhibitor	phosphodiesterase inhibitor	misc. channels	sodium channels	parp inhibitor	farnesylation inhibitor	ppar ligand	eg5 inhibitor	potassium channels
TRIM - bNOS/NOS inhibitor_4.71	1				bnos/nos inhibitor	phosphodiesterase inhibitor	misc. channels	inhibits mitochondrial permeability pore opening	farnesylation inhibitor	sodium channels	parp inhibitor	ppar ligand	hif-1 inhibitor
calcineurin inhibitor	1
Cypermethrin - calcineurin inhibitor_12.0	1				calcineurin inhibitor	prolyl cis-trans isomerase inhibitor	na+ ionophore	calcium channels	protein glycosylation inhibitor	vanilloid receptor ligand	ip3 receptor blocker	phosphodiesterase inhibitor	potassium channels
Tyrphostin-8 - calcineurin inhibitor_29.4	1				calcineurin inhibitor	prolyl cis-trans isomerase inhibitor	fo atp synthase inhibitor	mitochondrial uncoupler	kinase inhibitor	ap-1 inhibitor	inhibits mitochondrial permeability pore opening	hif-1 inhibitor	protease inhibitor
calcium channels	0.92
Nifedipine - Calcium channels_0.115	0.64				vitamin d receptor ligand	adp ribose polymerase inhibitor	pka activator	bioactive lipid	prostaglandin	paf receptor ligand	cannabinoid receptor ligand	voltage-dependent na channel inhibitor	pkc activator
Nifedipine - Calcium channels_2.89	0.84				phosphodiesterase inhibitor	inhibits mitochondrial permeability pore opening	bnos/nos inhibitor	misc. channels	eg5 inhibitor	calcineurin inhibitor	kinase inhibitor	ppar ligand	fo atp synthase inhibitor
SKF-96365 - Calcium channels_2.73	0.84				microtubule poison	hsp-90 inhibitor	histone deacetylase inhibitor	no donor	nos inhibitor	phosphatase inhibitor	bcl-2 ligand	inhibitor of mitochondrial na+ca+2 exchange	antioxidant
Dantrolene - Calcium channels_3.18	0.86				bnos/nos inhibitor	misc. channels	phosphodiesterase inhibitor	inhibits mitochondrial permeability pore opening	ppar ligand	farnesylation inhibitor	sodium channels	hif-1 inhibitor	kinase inhibitor
SKF-96365 - Calcium channels_0.546	0.88				hsp-90 inhibitor	microtubule poison	phosphatase inhibitor	histone deacetylase inhibitor	nos inhibitor	ppar ligand	kinase inhibitor	no donor	farnesylation inhibitor
Tetrandrine - Calcium channels_8.03	0.88				myosin ii inhibitor	dopamine antagonist	na+ ionophore	arf gef inhibitor	actin poison	vacuolar atpase inhibitor	calmodulin inhibitor	protein glycosylation inhibitor	er ca++ atpase inhibitor
Dichlorobenzamil - Calcium channels_11.8	0.89				dopamine antagonist	induces intracellular acidification	lipoxygenase inhibitor	activates heterotrimeriuc gtpases	antioxidant	ionophore	calmodulin inhibitor	mitochondrial uncoupler	calcium channels
Bay K-8644 - Calcium channels_14.0	0.92				calcineurin inhibitor	potassium channels	prolyl cis-trans isomerase inhibitor	eg5 inhibitor	estrogen antagonist	vanilloid receptor ligand	calcium channels	phospholipase inhibitor	ip3 receptor blocker
Thapsigargin - Calcium channels_0.307	0.92				protein glycosylation inhibitor	vacuolar atpase inhibitor	arf gef inhibitor	phosphodiesterase inhibitor	na+ ionophore	calcineurin inhibitor	calcium channels	mitochondrial uncoupler	bnos/nos inhibitor
Nimodipine - Calcium channels_11.9	0.93				phosphodiesterase inhibitor	sodium channels	hif-1 inhibitor	misc. channels	farnesylation inhibitor	calcium channels	calcineurin inhibitor	prolyl cis-trans isomerase inhibitor	kinase inhibitor
Nitrendipine - Calcium channels_13.9	0.93				microtubule poison	histone deacetylase inhibitor	hsp-90 inhibitor	inhibitor of mitochondrial na+ca+2 exchange	no donor	calcium channels	antioxidant	nos inhibitor	phosphatase inhibitor
Thapsigargin - Calcium channels_0.0615	0.93				protein glycosylation inhibitor	vacuolar atpase inhibitor	phosphodiesterase inhibitor	arf gef inhibitor	mitochondrial uncoupler	calcium channels	calcineurin inhibitor	na+ ionophore	hif-1 inhibitor
Loperamide - Calcium channels_9.74	0.95				lipoxygenase inhibitor	inhibitor of mitochondrial na+ca+2 exchange	guanylate cyclase inhibitor	calmodulin inhibitor	calcium channels	calcium ionophore	induces intracellular acidification	antioxidant	actin poison
Cyclopiazonic acid - Calcium channels_2.97	0.97				phosphodiesterase inhibitor	sodium channels	calcium channels	bnos/nos inhibitor	potassium channels	ip3 receptor blocker	protein glycosylation inhibitor	farnesylation inhibitor	vanilloid receptor ligand
Nicardipine - Calcium channels_9.69	0.97				calcineurin inhibitor	prolyl cis-trans isomerase inhibitor	calcium channels	phosphodiesterase inhibitor	vanilloid receptor ligand	na+ ionophore	ip3 receptor blocker	mitochondrial uncoupler	protein glycosylation inhibitor
Nifedipine - Calcium channels_14.4	0.97				lipoxygenase inhibitor	dna binding	calcium channels	fatty acid biosynthesis inhibitor	protease inhibitor	no donor	antioxidant	calmodulin inhibitor	guanylate cyclase inhibitor
SKF-96365 - Calcium channels_13.6	0.99				inhibitor of mitochondrial na+ca+2 exchange	calcium channels	microtubule poison	protease inhibitor	antioxidant	no donor	vanilloid receptor ligand	hsp-90 inhibitor	fatty acid biosynthesis inhibitor
Thapsigargin - Calcium channels_1.54	0.99				calmodulin inhibitor	calcium channels	fatty acid biosynthesis inhibitor	lipoxygenase inhibitor	mitochondrial uncoupler	protease inhibitor	kinase inhibitor	vanilloid receptor ligand	induces intracellular acidification
Amiodarone - Calcium channels_7.33	1				calcium channels	vanilloid receptor ligand	calmodulin inhibitor	antioxidant	myosin ii inhibitor	ip3 receptor blocker	calcineurin inhibitor	potassium channels	prolyl cis-trans isomerase inhibitor
Benzamil - Calcium channels_14.0	1				calcium channels	calcineurin inhibitor	phosphodiesterase inhibitor	kinase inhibitor	prolyl cis-trans isomerase inhibitor	fatty acid biosynthesis inhibitor	fo atp synthase inhibitor	protease inhibitor	vanilloid receptor ligand
Cyclopiazonic acid - Calcium channels_14.9	1				calcium channels	mitochondrial uncoupler	sodium channels	calcineurin inhibitor	prolyl cis-trans isomerase inhibitor	phospholipase inhibitor	protein glycosylation inhibitor	antioxidant	ip3 receptor blocker
calcium ionophore	0.88
BAPTA-AM - Calcium ionophore_0.262	0.6				adp ribose polymerase inhibitor	prostaglandin	vitamin d receptor ligand	pka activator	bioactive lipid	paf receptor ligand	cannabinoid receptor ligand	potassium channels	pkc activator
Ionomycin - Calcium ionophore_7.36	0.95				activates heterotrimeriuc gtpases	dopamine antagonist	pin1 inhibitor	guanylate cyclase inhibitor	calcium ionophore	calmodulin inhibitor	lipoxygenase inhibitor	nfkappab inhibitor	actin poison
BAPTA-AM - Calcium ionophore_6.54	0.97				lipoxygenase inhibitor	guanylate cyclase inhibitor	calcium ionophore	calmodulin inhibitor	fatty acid biosynthesis inhibitor	antioxidant	induces intracellular acidification	dopamine antagonist	calcium channels
A-23187 - Calcium ionophore_0.382	1				calcium ionophore	mitochondrial uncoupler	induces intracellular acidification	phosphodiesterase inhibitor	ionophore	misc. channels	potassium channels	protein glycosylation inhibitor	hif-1 inhibitor
calmodulin inhibitor	0.85
Phenoxybenzamine - calmodulin inhibitor_3.29	0.41				sirt1 activator	dhfr inhibitor	fo atp synthase inhibitor	kinase inhibitor	nos inhibitor	iron chelator	ap-1 inhibitor	steroid hormone	protease inhibitor
E6 Berbamine - calmodulin inhibitor_6.60	0.99				actin poison	calmodulin inhibitor	myosin ii inhibitor	protein glycosylation inhibitor	vacuolar atpase inhibitor	na+ ionophore	arf gef inhibitor	dopamine antagonist	er ca++ atpase inhibitor
Phenoxybenzamine - calmodulin inhibitor_16.5	0.99				lipoxygenase inhibitor	calmodulin inhibitor	fatty acid biosynthesis inhibitor	guanylate cyclase inhibitor	antioxidant	alpha adrenergic agonist	calcium ionophore	induces intracellular acidification	calcium channels
W7 - calmodulin inhibitor_13.3	1				calmodulin inhibitor	actin poison	dopamine antagonist	alpha adrenergic agonist	protein glycosylation inhibitor	na+ ionophore	activates heterotrimeriuc gtpases	calcium ionophore	fatty acid biosynthesis inhibitor
cannabinoid receptor ligand	0.92
N-Linoleoylglycine - cannabinoid receptor ligand_0.200	0.82				ppar ligand	sodium channels	kinase inhibitor	hif-1 inhibitor	farnesylation inhibitor	phosphodiesterase inhibitor	parp inhibitor	calcium channels	bnos/nos inhibitor
2-Arachidonoylglycerol - cannabinoid receptor ligand_0.0400	0.95				adp ribose polymerase inhibitor	prostaglandin	vitamin d receptor ligand	bioactive lipid	cannabinoid receptor ligand	pka activator	paf receptor ligand	voltage-dependent na channel inhibitor	misc. channels
Mead ethanolamide - cannabinoid receptor ligand_0.200	1				cannabinoid receptor ligand	prostaglandin	bioactive lipid	vitamin d receptor ligand	adp ribose polymerase inhibitor	pka activator	paf receptor ligand	voltage-dependent na channel inhibitor	pkc activator
dhfr inhibitor	1
Methotrexate - DHFR inhibitor_0.0942	1				dhfr inhibitor	sirt1 activator	steroid hormone	inhibits dna synthesis	iron chelator	misc. channels	fo atp synthase inhibitor	inhibits mitochondrial permeability pore opening	ppar ligand
Methotrexate - DHFR inhibitor_0.471	1				dhfr inhibitor	steroid hormone	sirt1 activator	iron chelator	inhibits dna synthesis	inhibits transcription	fo atp synthase inhibitor	inhibits protein synthesis	nos inhibitor
Methotrexate - DHFR inhibitor_11.8	1				dhfr inhibitor	sirt1 activator	steroid hormone	iron chelator	inhibits dna synthesis	fo atp synthase inhibitor	inhibits protein synthesis	kinase inhibitor	nos inhibitor
Methotrexate - DHFR inhibitor_2.36	1				dhfr inhibitor	sirt1 activator	steroid hormone	inhibits dna synthesis	iron chelator	fo atp synthase inhibitor	kinase inhibitor	ppar ligand	inhibits mitochondrial permeability pore opening
dna binding	0.99
Hoechst 33342 (cell permeable) (BisBenzimide) - DNA binding _0.356	0.99				kinase inhibitor	dna binding	nos inhibitor	ppar ligand	fo atp synthase inhibitor	misc. channels	inhibits protein synthesis	protease inhibitor	phosphodiesterase inhibitor
Hoechst 33342 (cell permeable) (BisBenzimide) - DNA binding _1.78	1				dna binding	fatty acid biosynthesis inhibitor	lipoxygenase inhibitor	bcl-2 ligand	protease inhibitor	guanylate cyclase inhibitor	inhibitor of mitochondrial na+ca+2 exchange	nos inhibitor	kinase inhibitor
dopamine antagonist	0.99
Clozapine - dopamine antagonist_15.3	0.99				myosin ii inhibitor	dopamine antagonist	na+ ionophore	calcium channels	calmodulin inhibitor	protein glycosylation inhibitor	antioxidant	prolyl cis-trans isomerase inhibitor	vanilloid receptor ligand
Trifluoperazine - dopamine antagonist_10.4	1				dopamine antagonist	activates heterotrimeriuc gtpases	pin1 inhibitor	calcium ionophore	calmodulin inhibitor	guanylate cyclase inhibitor	induces intracellular acidification	lipoxygenase inhibitor	ionophore
eg5 inhibitor	1
Monastrol - Eg5 inhibitor_17.1	1				eg5 inhibitor	ppar ligand	misc. channels	vanilloid receptor ligand	inhibits mitochondrial permeability pore opening	ip3 receptor blocker	calcineurin inhibitor	phosphodiesterase inhibitor	kinase inhibitor
er ca++ atpase inhibitor	1
2;5-Ditertbutylhydroquinone - ER Ca++ ATPase inhibitor_4.50	1				er ca++ atpase inhibitor	n-wasp inhibitor	protein glycosylation inhibitor	na+ ionophore	arf gef inhibitor	calcium channels	potassium channels	phospholipase inhibitor	estrogen antagonist
estrogen antagonist	1
Tamoxifen - estrogen antagonist_2.69	1				estrogen antagonist	phospholipase inhibitor	potassium channels	hif-1 inhibitor	sodium channels	kinase inhibitor	farnesylation inhibitor	calcium channels	misc. channels
farnesylation inhibitor	0.82
Manumycin A - farnesylation inhibitor_9.08	0.62				dopamine antagonist	activates heterotrimeriuc gtpases	pin1 inhibitor	actin poison	calmodulin inhibitor	nfkappab inhibitor	vacuolar atpase inhibitor	protein glycosylation inhibitor	arf gef inhibitor
Manumycin A - farnesylation inhibitor_1.82	0.78				protease inhibitor	nos inhibitor	bcl-2 ligand	dna binding	fo atp synthase inhibitor	kinase inhibitor	fatty acid biosynthesis inhibitor	ap-1 inhibitor	inhibits protein synthesis
Acetyl (N)-S-farnesyl-L-cysteine - farnesylation inhibitor_0.109	0.79				adp ribose polymerase inhibitor	vitamin d receptor ligand	prostaglandin	pka activator	bioactive lipid	paf receptor ligand	cannabinoid receptor ligand	voltage-dependent na channel inhibitor	pkc activator
B581 - farnesylation inhibitor_2.12	0.96				bnos/nos inhibitor	misc. channels	phosphodiesterase inhibitor	farnesylation inhibitor	parp inhibitor	sodium channels	ppar ligand	inhibits mitochondrial permeability pore opening	hif-1 inhibitor
Acetyl (N)-S-farnesyl-L-cysteine - farnesylation inhibitor_2.72	0.97				bnos/nos inhibitor	misc. channels	farnesylation inhibitor	sodium channels	parp inhibitor	phosphodiesterase inhibitor	ppar ligand	cannabinoid receptor ligand	potassium channels
fatty acid biosynthesis inhibitor	0.93
Cerulenin - Fatty acid biosynthesis inhibitor_4.48	0.86				fo atp synthase inhibitor	kinase inhibitor	ap-1 inhibitor	calcineurin inhibitor	protease inhibitor	inhibits mitochondrial permeability pore opening	prolyl cis-trans isomerase inhibitor	ppar ligand	mitochondrial uncoupler
Cerulenin - Fatty acid biosynthesis inhibitor_22.4	0.99				lipoxygenase inhibitor	fatty acid biosynthesis inhibitor	calmodulin inhibitor	alpha adrenergic agonist	guanylate cyclase inhibitor	calcium ionophore	antioxidant	dopamine antagonist	actin poison
fo atp synthase inhibitor	0.99
Oligomycin A - Fo ATP synthase inhibitor _0.0506	0.99				inhibits mitochondrial permeability pore opening	fo atp synthase inhibitor	steroid hormone	ap-1 inhibitor	phosphodiesterase inhibitor	misc. channels	hif-1 inhibitor	ppar ligand	kinase inhibitor
Oligomycin A - Fo ATP synthase inhibitor _1.26	0.99				protease inhibitor	fo atp synthase inhibitor	kinase inhibitor	nos inhibitor	histone deacetylase inhibitor	fatty acid biosynthesis inhibitor	hsp-90 inhibitor	calcium channels	dna binding
Oligomycin A - Fo ATP synthase inhibitor _6.32	1				fo atp synthase inhibitor	protease inhibitor	bcl-2 ligand	inhibits protein synthesis	kinase inhibitor	calcineurin inhibitor	fatty acid biosynthesis inhibitor	prolyl cis-trans isomerase inhibitor	ap-1 inhibitor
guanylate cyclase inhibitor	0.9
LY-83583 - guanylate cyclase inhibitor_0.799	0.7				inhibits protein synthesis	iron chelator	inhibits dna synthesis	inhibits transcription	protease inhibitor	dna binding	nos inhibitor	na+k+atpase inhibitor	fo atp synthase inhibitor
LY-83583 - guanylate cyclase inhibitor_20.0	1				guanylate cyclase inhibitor	pin1 inhibitor	calcium ionophore	activates heterotrimeriuc gtpases	dopamine antagonist	lipoxygenase inhibitor	inhibitor of mitochondrial na+ca+2 exchange	no donor	actin poison
LY-83583 - guanylate cyclase inhibitor_4.00	1				guanylate cyclase inhibitor	calcium ionophore	no donor	induces intracellular acidification	lipoxygenase inhibitor	inhibitor of mitochondrial na+ca+2 exchange	dopamine antagonist	vacuolar atpase inhibitor	actin poison
hif-1 inhibitor	1
YC-1 - Hif-1 inhibitor_16.4	1				hif-1 inhibitor	calcium channels	ip3 receptor blocker	prolyl cis-trans isomerase inhibitor	kinase inhibitor	mitochondrial uncoupler	calcineurin inhibitor	protein glycosylation inhibitor	calmodulin inhibitor
YC-1 - Hif-1 inhibitor_3.29	1				hif-1 inhibitor	kinase inhibitor	misc. channels	phosphodiesterase inhibitor	ppar ligand	sodium channels	farnesylation inhibitor	fo atp synthase inhibitor	phospholipase inhibitor
histone deacetylase inhibitor	0.95
Trichostatin-A - histone deacetylase inhibitor_16.5	0.79				fatty acid biosynthesis inhibitor	calmodulin inhibitor	kinase inhibitor	lipoxygenase inhibitor	calcium channels	mitochondrial uncoupler	fo atp synthase inhibitor	alpha adrenergic agonist	protease inhibitor
Trichostatin-A - histone deacetylase inhibitor_0.132	1				histone deacetylase inhibitor	hsp-90 inhibitor	microtubule poison	nos inhibitor	ap-1 inhibitor	protease inhibitor	ikappab kinase inhibitor	fo atp synthase inhibitor	phosphatase inhibitor
Trichostatin-A - histone deacetylase inhibitor_0.661	1				histone deacetylase inhibitor	hsp-90 inhibitor	microtubule poison	nos inhibitor	phosphatase inhibitor	protease inhibitor	kinase inhibitor	ap-1 inhibitor	fo atp synthase inhibitor
Trichostatin-A - histone deacetylase inhibitor_3.31	1				histone deacetylase inhibitor	hsp-90 inhibitor	microtubule poison	kinase inhibitor	protease inhibitor	nos inhibitor	fo atp synthase inhibitor	bcl-2 ligand	fatty acid biosynthesis inhibitor
hsp-90 inhibitor	0.96
Geldanamycin - HSP-90 inhibitor_0.0713	0.79				cannabinoid receptor ligand	ppar ligand	bioactive lipid	prostaglandin	misc. channels	vitamin d receptor ligand	paf receptor ligand	adp ribose polymerase inhibitor	pka activator
Geldanamycin - HSP-90 inhibitor_8.92	0.92				antioxidant	histone deacetylase inhibitor	kinase inhibitor	inhibitor of mitochondrial na+ca+2 exchange	protease inhibitor	vanilloid receptor ligand	hsp-90 inhibitor	fatty acid biosynthesis inhibitor	calcium channels
17-Allylamino-geldanamycin - HSP-90 inhibitor_0.0683	1				hsp-90 inhibitor	microtubule poison	histone deacetylase inhibitor	nos inhibitor	phosphatase inhibitor	ppar ligand	protease inhibitor	kinase inhibitor	no donor
17-Allylamino-geldanamycin - HSP-90 inhibitor_0.341	1				hsp-90 inhibitor	microtubule poison	histone deacetylase inhibitor	nos inhibitor	ppar ligand	phosphatase inhibitor	kinase inhibitor	protease inhibitor	parp inhibitor
17-Allylamino-geldanamycin - HSP-90 inhibitor_1.71	1				hsp-90 inhibitor	protease inhibitor	nos inhibitor	ap-1 inhibitor	microtubule poison	ppar ligand	vanilloid receptor ligand	calcium channels	kinase inhibitor
17-Allylamino-geldanamycin - HSP-90 inhibitor_8.54	1				hsp-90 inhibitor	protease inhibitor	nos inhibitor	ap-1 inhibitor	fo atp synthase inhibitor	kinase inhibitor	ppar ligand	phosphodiesterase inhibitor	calcium channels
Geldanamycin - HSP-90 inhibitor_0.357	1				hsp-90 inhibitor	microtubule poison	histone deacetylase inhibitor	nos inhibitor	phosphatase inhibitor	protease inhibitor	ppar ligand	kinase inhibitor	no donor
Geldanamycin - HSP-90 inhibitor_1.78	1				hsp-90 inhibitor	microtubule poison	histone deacetylase inhibitor	nos inhibitor	protease inhibitor	no donor	kinase inhibitor	ap-1 inhibitor	fo atp synthase inhibitor
ikappab kinase inhibitor	1
Parthenolide - IkappaB kinase inhibitor_4.03	1				ikappab kinase inhibitor	ap-1 inhibitor	fo atp synthase inhibitor	bcl-2 ligand	protease inhibitor	histone deacetylase inhibitor	hsp-90 inhibitor	nos inhibitor	kinase inhibitor
induces intracellular acidification	0.88
Nigericin - induces intracellular acidification_0.276	0.63				mitochondrial uncoupler	phosphodiesterase inhibitor	kinase inhibitor	inhibits mitochondrial permeability pore opening	misc. channels	hif-1 inhibitor	calcineurin inhibitor	fo atp synthase inhibitor	farnesylation inhibitor
Nigericin - induces intracellular acidification_1.38	1				induces intracellular acidification	inhibits protein synthesis	ionophore	guanylate cyclase inhibitor	na+k+atpase inhibitor	protease inhibitor	lipoxygenase inhibitor	no donor	mitochondrial uncoupler
Nigericin - induces intracellular acidification_6.90	1				induces intracellular acidification	lipoxygenase inhibitor	dopamine antagonist	guanylate cyclase inhibitor	inhibitor of mitochondrial na+ca+2 exchange	calmodulin inhibitor	calcium ionophore	calcium channels	antioxidant
inhibitor of mitochondrial na+ca+2 exchange	1
CGP-37157 - inhibitor of mitochondrial Na+Ca+2 exchange_15.4	1				inhibitor of mitochondrial na+ca+2 exchange	antioxidant	calcium channels	vanilloid receptor ligand	no donor	induces intracellular acidification	lipoxygenase inhibitor	fatty acid biosynthesis inhibitor	calmodulin inhibitor
inhibits dna synthesis	0.92
Doxorubicin - Inhibits DNA synthesis_1.72	0.1				pkc activator	calcium ionophore	nfkappab inhibitor	phospholipase inhibitor	farnesylation inhibitor	potassium channels	bioactive lipid	er ca++ atpase inhibitor	estrogen antagonist
Mitomycin C - Inhibits DNA synthesis_15.0	0.18				guanylate cyclase inhibitor	lipoxygenase inhibitor	dopamine antagonist	calcium ionophore	pin1 inhibitor	activates heterotrimeriuc gtpases	induces intracellular acidification	calmodulin inhibitor	inhibitor of mitochondrial na+ca+2 exchange
Mycophenolic acid - Inhibits DNA synthesis_0.138	0.77				fo atp synthase inhibitor	phosphodiesterase inhibitor	inhibits mitochondrial permeability pore opening	protease inhibitor	bnos/nos inhibitor	kinase inhibitor	inhibits protein synthesis	histone deacetylase inhibitor	nos inhibitor
ICRF-193 - Inhibits DNA synthesis_17.7	0.88				microtubule poison	histone deacetylase inhibitor	hsp-90 inhibitor	nos inhibitor	bcl-2 ligand	ikappab kinase inhibitor	protease inhibitor	fo atp synthase inhibitor	kinase inhibitor
Doxorubicin - Inhibits DNA synthesis_0.0690	0.9				ppar ligand	misc. channels	sirt1 activator	cannabinoid receptor ligand	kinase inhibitor	parp inhibitor	inhibits mitochondrial permeability pore opening	inhibits dna synthesis	bnos/nos inhibitor
Aphidicolin - Inhibits DNA synthesis_14.8	0.99				inhibits transcription	inhibits dna synthesis	iron chelator	steroid hormone	sirt1 activator	inhibits protein synthesis	na+k+atpase inhibitor	dhfr inhibitor	nos inhibitor
Camptothecin - Inhibits DNA synthesis_0.115	0.99				inhibits transcription	inhibits dna synthesis	na+k+atpase inhibitor	iron chelator	inhibits protein synthesis	sirt1 activator	steroid hormone	dhfr inhibitor	nos inhibitor
Camptothecin - Inhibits DNA synthesis_14.4	0.99				inhibits protein synthesis	inhibits dna synthesis	inhibits transcription	fo atp synthase inhibitor	protease inhibitor	kinase inhibitor	iron chelator	sirt1 activator	nos inhibitor
Mitomycin C - Inhibits DNA synthesis_2.99	0.99				inhibits transcription	inhibits dna synthesis	iron chelator	na+k+atpase inhibitor	inhibits protein synthesis	sirt1 activator	nos inhibitor	steroid hormone	protease inhibitor
10-Hydroxycamptothecin - Inhibits DNA synthesis_0.110	1				inhibits dna synthesis	inhibits transcription	sirt1 activator	dhfr inhibitor	steroid hormone	inhibits protein synthesis	iron chelator	na+k+atpase inhibitor	fo atp synthase inhibitor
10-Hydroxycamptothecin - Inhibits DNA synthesis_0.549	1				inhibits dna synthesis	inhibits transcription	na+k+atpase inhibitor	iron chelator	inhibits protein synthesis	sirt1 activator	steroid hormone	dhfr inhibitor	nos inhibitor
10-Hydroxycamptothecin - Inhibits DNA synthesis_13.7	1				inhibits dna synthesis	sirt1 activator	inhibits transcription	iron chelator	parp inhibitor	fo atp synthase inhibitor	kinase inhibitor	inhibits protein synthesis	histone deacetylase inhibitor
10-Hydroxycamptothecin - Inhibits DNA synthesis_2.74	1				inhibits dna synthesis	inhibits transcription	inhibits protein synthesis	iron chelator	na+k+atpase inhibitor	bcl-2 ligand	protease inhibitor	sirt1 activator	nos inhibitor
Aphidicolin - Inhibits DNA synthesis_0.118	1				inhibits dna synthesis	dhfr inhibitor	sirt1 activator	iron chelator	steroid hormone	inhibits transcription	inhibits protein synthesis	nos inhibitor	fo atp synthase inhibitor
Aphidicolin - Inhibits DNA synthesis_0.591	1				inhibits dna synthesis	inhibits transcription	steroid hormone	sirt1 activator	iron chelator	dhfr inhibitor	inhibits protein synthesis	fo atp synthase inhibitor	na+k+atpase inhibitor
Aphidicolin - Inhibits DNA synthesis_2.95	1				inhibits dna synthesis	iron chelator	inhibits transcription	sirt1 activator	inhibits protein synthesis	steroid hormone	protease inhibitor	nos inhibitor	bcl-2 ligand
Camptothecin - Inhibits DNA synthesis_0.574	1				inhibits dna synthesis	inhibits transcription	iron chelator	inhibits protein synthesis	sirt1 activator	dhfr inhibitor	dna binding	nos inhibitor	protease inhibitor
Camptothecin - Inhibits DNA synthesis_2.87	1				inhibits dna synthesis	inhibits transcription	iron chelator	inhibits protein synthesis	sirt1 activator	bcl-2 ligand	fo atp synthase inhibitor	protease inhibitor	nos inhibitor
Doxorubicin - Inhibits DNA synthesis_0.345	1				inhibits dna synthesis	inhibits transcription	na+k+atpase inhibitor	iron chelator	inhibits protein synthesis	sirt1 activator	nos inhibitor	dhfr inhibitor	retinoid receptor ligand
Etoposide - Inhibits DNA synthesis_0.0680	1				inhibits dna synthesis	ppar ligand	kinase inhibitor	nos inhibitor	sirt1 activator	misc. channels	fo atp synthase inhibitor	inhibits mitochondrial permeability pore opening	protease inhibitor
Etoposide - Inhibits DNA synthesis_0.340	1				inhibits dna synthesis	sirt1 activator	iron chelator	inhibits transcription	nos inhibitor	dhfr inhibitor	dna binding	fo atp synthase inhibitor	protease inhibitor
Etoposide - Inhibits DNA synthesis_1.70	1				inhibits dna synthesis	inhibits transcription	iron chelator	na+k+atpase inhibitor	sirt1 activator	inhibits protein synthesis	dhfr inhibitor	retinoid receptor ligand	nos inhibitor
Etoposide - Inhibits DNA synthesis_8.50	1				inhibits dna synthesis	inhibits transcription	na+k+atpase inhibitor	iron chelator	sirt1 activator	dhfr inhibitor	inhibits protein synthesis	nos inhibitor	retinoid receptor ligand
ICRF-193 - Inhibits DNA synthesis_3.54	1				inhibits dna synthesis	nos inhibitor	sirt1 activator	bcl-2 ligand	histone deacetylase inhibitor	dna binding	hsp-90 inhibitor	protease inhibitor	inhibits transcription
Mitomycin C - Inhibits DNA synthesis_0.120	1				inhibits dna synthesis	dhfr inhibitor	sirt1 activator	iron chelator	inhibits transcription	steroid hormone	fo atp synthase inhibitor	inhibits protein synthesis	nos inhibitor
Mitomycin C - Inhibits DNA synthesis_0.598	1				inhibits dna synthesis	inhibits transcription	iron chelator	sirt1 activator	steroid hormone	dhfr inhibitor	inhibits protein synthesis	fo atp synthase inhibitor	nos inhibitor
Mycophenolic acid - Inhibits DNA synthesis_0.689	1				inhibits dna synthesis	steroid hormone	inhibits transcription	sirt1 activator	fo atp synthase inhibitor	inhibits protein synthesis	iron chelator	dhfr inhibitor	protease inhibitor
Mycophenolic acid - Inhibits DNA synthesis_17.2	1				inhibits dna synthesis	sirt1 activator	iron chelator	inhibits transcription	steroid hormone	fo atp synthase inhibitor	inhibits protein synthesis	dhfr inhibitor	protease inhibitor
Mycophenolic acid - Inhibits DNA synthesis_3.44	1				inhibits dna synthesis	iron chelator	inhibits transcription	sirt1 activator	steroid hormone	fo atp synthase inhibitor	inhibits protein synthesis	dhfr inhibitor	protease inhibitor
inhibits mitochondrial permeability pore opening	1
Decylubiquinone - inhibits mitochondrial permeability pore opening _3.10	1				inhibits mitochondrial permeability pore opening	phosphodiesterase inhibitor	kinase inhibitor	misc. channels	calcium channels	fo atp synthase inhibitor	calcineurin inhibitor	farnesylation inhibitor	ppar ligand
inhibits protein synthesis	0.91
Lycorine - Inhibits protein synthesis_0.696	0.59				phosphodiesterase inhibitor	protein glycosylation inhibitor	calcineurin inhibitor	mitochondrial uncoupler	inhibits mitochondrial permeability pore opening	calcium channels	farnesylation inhibitor	hif-1 inhibitor	prolyl cis-trans isomerase inhibitor
Cycloheximide - inhibits protein synthesis_0.142	0.71				calcineurin inhibitor	mitochondrial uncoupler	phosphodiesterase inhibitor	hif-1 inhibitor	inhibits mitochondrial permeability pore opening	fo atp synthase inhibitor	kinase inhibitor	prolyl cis-trans isomerase inhibitor	calcium channels
Puromycin - inhibits protein synthesis_0.377	0.73				guanylate cyclase inhibitor	calcium ionophore	lipoxygenase inhibitor	vacuolar atpase inhibitor	induces intracellular acidification	no donor	calmodulin inhibitor	phosphatase inhibitor	mitochondrial uncoupler
Cycloheximide - inhibits protein synthesis_0.711	0.92				fo atp synthase inhibitor	ap-1 inhibitor	calcineurin inhibitor	inhibits mitochondrial permeability pore opening	protease inhibitor	phosphodiesterase inhibitor	inhibits protein synthesis	mitochondrial uncoupler	kinase inhibitor
Lycorine - Inhibits protein synthesis_3.48	0.96				bcl-2 ligand	protease inhibitor	fo atp synthase inhibitor	inhibits protein synthesis	inhibits dna synthesis	dna binding	nos inhibitor	ap-1 inhibitor	iron chelator
Anisomycin - inhibits protein synthesis_0.754	0.97				inhibits transcription	na+k+atpase inhibitor	inhibits protein synthesis	inhibits dna synthesis	iron chelator	nos inhibitor	steroid hormone	protease inhibitor	induces intracellular acidification
Cycloheximide - inhibits protein synthesis_3.55	0.97				fo atp synthase inhibitor	protease inhibitor	inhibits protein synthesis	ap-1 inhibitor	bcl-2 ligand	inhibits dna synthesis	sirt1 activator	nos inhibitor	kinase inhibitor
Anisomycin - inhibits protein synthesis_3.77	0.99				na+k+atpase inhibitor	inhibits protein synthesis	inhibits transcription	inhibits dna synthesis	induces intracellular acidification	protease inhibitor	bcl-2 ligand	nos inhibitor	lipoxygenase inhibitor
Anisomycin - inhibits protein synthesis_0.151	1				inhibits protein synthesis	inhibits transcription	inhibits dna synthesis	steroid hormone	iron chelator	fo atp synthase inhibitor	sirt1 activator	na+k+atpase inhibitor	protease inhibitor
Anisomycin - inhibits protein synthesis_18.8	1				inhibits protein synthesis	induces intracellular acidification	lipoxygenase inhibitor	guanylate cyclase inhibitor	na+k+atpase inhibitor	protease inhibitor	ionophore	fatty acid biosynthesis inhibitor	mitochondrial uncoupler
Cycloheximide - inhibits protein synthesis_17.8	1				inhibits protein synthesis	inhibits transcription	na+k+atpase inhibitor	inhibits dna synthesis	iron chelator	protease inhibitor	induces intracellular acidification	nos inhibitor	lipoxygenase inhibitor
Lycorine - Inhibits protein synthesis_17.4	1				inhibits protein synthesis	inhibits dna synthesis	inhibits transcription	na+k+atpase inhibitor	iron chelator	protease inhibitor	nos inhibitor	bcl-2 ligand	induces intracellular acidification
Puromycin - inhibits protein synthesis_9.43	1				inhibits protein synthesis	lipoxygenase inhibitor	protease inhibitor	bcl-2 ligand	fatty acid biosynthesis inhibitor	dna binding	fo atp synthase inhibitor	kinase inhibitor	iron chelator
inhibits transcription	0.99
Triptolide - Inhibits transcription_13.9	0.97				fo atp synthase inhibitor	inhibits protein synthesis	inhibits transcription	protease inhibitor	inhibits dna synthesis	sirt1 activator	ap-1 inhibitor	nos inhibitor	kinase inhibitor
Actinomycin D - Inhibits transcription_0.431	0.99				na+k+atpase inhibitor	inhibits transcription	inhibits dna synthesis	inhibits protein synthesis	iron chelator	nos inhibitor	histone deacetylase inhibitor	protease inhibitor	sirt1 activator
Triptolide - Inhibits transcription_2.77	0.99				inhibits protein synthesis	inhibits transcription	fo atp synthase inhibitor	inhibits dna synthesis	protease inhibitor	iron chelator	bcl-2 ligand	steroid hormone	kinase inhibitor
Actinomycin D - Inhibits transcription_0.0861	1				inhibits transcription	inhibits dna synthesis	na+k+atpase inhibitor	inhibits protein synthesis	iron chelator	sirt1 activator	steroid hormone	nos inhibitor	dna binding
Actinomycin D - Inhibits transcription_10.8	1				inhibits transcription	inhibits dna synthesis	na+k+atpase inhibitor	inhibits protein synthesis	iron chelator	nos inhibitor	protease inhibitor	sirt1 activator	fo atp synthase inhibitor
Actinomycin D - Inhibits transcription_2.15	1				inhibits transcription	na+k+atpase inhibitor	inhibits dna synthesis	inhibits protein synthesis	protease inhibitor	nos inhibitor	bcl-2 ligand	iron chelator	histone deacetylase inhibitor
Triptolide - Inhibits transcription_0.111	1				inhibits transcription	inhibits dna synthesis	steroid hormone	inhibits protein synthesis	sirt1 activator	iron chelator	dhfr inhibitor	fo atp synthase inhibitor	na+k+atpase inhibitor
Triptolide - Inhibits transcription_0.555	1				inhibits transcription	inhibits dna synthesis	steroid hormone	inhibits protein synthesis	na+k+atpase inhibitor	sirt1 activator	iron chelator	dhfr inhibitor	fo atp synthase inhibitor
integrin inhibitor	1
Cyclo [Arg-Gly-Asp-D-Phe-Val] - integrin inhibitor_1.74	1				integrin inhibitor	potassium channels	n-wasp inhibitor	phospholipase inhibitor	estrogen antagonist	paf receptor ligand	pkc activator	er ca++ atpase inhibitor	sphingosine kinase inhibitor
Cyclo [Arg-Gly-Asp-D-Phe-Val] - integrin inhibitor_8.70	1				integrin inhibitor	sphingosine kinase inhibitor	actin poison	paf receptor ligand	potassium channels	n-wasp inhibitor	phospholipase inhibitor	pka activator	bioactive lipid
ionophore	1
Alamethicin - ionophore_0.509	1				ionophore	induces intracellular acidification	mitochondrial uncoupler	antioxidant	vanilloid receptor ligand	calcium channels	calcium ionophore	kinase inhibitor	protease inhibitor
ip3 receptor blocker	1
2-APB - IP3 receptor blocker_22.2	1				ip3 receptor blocker	calcium channels	vanilloid receptor ligand	phosphodiesterase inhibitor	phospholipase inhibitor	hif-1 inhibitor	potassium channels	sodium channels	kinase inhibitor
iron chelator	1
Hinokitiol - iron chelator_30.5	1				iron chelator	inhibits protein synthesis	inhibits dna synthesis	inhibits transcription	protease inhibitor	sirt1 activator	fo atp synthase inhibitor	bcl-2 ligand	nos inhibitor
Hinokitiol - iron chelator_6.09	1				iron chelator	sirt1 activator	dhfr inhibitor	inhibits dna synthesis	steroid hormone	retinoid receptor ligand	inhibits protein synthesis	nos inhibitor	fo atp synthase inhibitor
kinase inhibitor	0.86
ML7 - kinase inhibitor_12.0	0.52				dopamine antagonist	actin poison	activates heterotrimeriuc gtpases	calmodulin inhibitor	pin1 inhibitor	na+ ionophore	alpha adrenergic agonist	protein glycosylation inhibitor	myosin ii inhibitor
ML9 - kinase inhibitor_15.4	0.53				actin poison	calmodulin inhibitor	dopamine antagonist	na+ ionophore	protein glycosylation inhibitor	myosin ii inhibitor	alpha adrenergic agonist	antioxidant	calcium channels
Staurosporine - kinase inhibitor_2.14	0.53				guanylate cyclase inhibitor	nfkappab inhibitor	dopamine antagonist	calcium ionophore	vacuolar atpase inhibitor	actin poison	activates heterotrimeriuc gtpases	pin1 inhibitor	inhibitor of mitochondrial na+ca+2 exchange
H-89 - kinase inhibitor_2.24	0.59				pkc activator	potassium channels	phospholipase inhibitor	n-wasp inhibitor	estrogen antagonist	bioactive lipid	misc. channels	parp inhibitor	farnesylation inhibitor
Staurosporine - kinase inhibitor_0.0857	0.6				guanylate cyclase inhibitor	vacuolar atpase inhibitor	arf gef inhibitor	calcium ionophore	pin1 inhibitor	actin poison	phosphatase inhibitor	protein glycosylation inhibitor	nfkappab inhibitor
Staurosporine - kinase inhibitor_0.429	0.6				guanylate cyclase inhibitor	vacuolar atpase inhibitor	calcium ionophore	pin1 inhibitor	arf gef inhibitor	actin poison	phosphatase inhibitor	nfkappab inhibitor	lipoxygenase inhibitor
Y-27632 - kinase inhibitor_20.2	0.6				protein glycosylation inhibitor	n-wasp inhibitor	arf gef inhibitor	potassium channels	sphingosine kinase inhibitor	na+ ionophore	actin poison	myosin ii inhibitor	calcium channels
H-89 - kinase inhibitor_11.2	0.62				actin poison	calmodulin inhibitor	na+ ionophore	myosin ii inhibitor	protein glycosylation inhibitor	calcium channels	vacuolar atpase inhibitor	arf gef inhibitor	prolyl cis-trans isomerase inhibitor
Staurosporine - kinase inhibitor_10.7	0.63				guanylate cyclase inhibitor	nfkappab inhibitor	activates heterotrimeriuc gtpases	calcium ionophore	dopamine antagonist	pin1 inhibitor	actin poison	inhibitor of mitochondrial na+ca+2 exchange	calmodulin inhibitor
KT-5720 - kinase inhibitor_0.00945	0.66				adp ribose polymerase inhibitor	vitamin d receptor ligand	pka activator	bioactive lipid	prostaglandin	paf receptor ligand	cannabinoid receptor ligand	potassium channels	pkc activator
AG213 (Tyrphostin 47) - kinase inhibitor_0.182	0.67				vitamin d receptor ligand	adp ribose polymerase inhibitor	pka activator	prostaglandin	bioactive lipid	paf receptor ligand	cannabinoid receptor ligand	voltage-dependent na channel inhibitor	pkc activator
SB 202190 - kinase inhibitor_15.1	0.68				n-wasp inhibitor	protein glycosylation inhibitor	na+ ionophore	potassium channels	phospholipase inhibitor	calmodulin inhibitor	calcineurin inhibitor	calcium channels	prolyl cis-trans isomerase inhibitor
SB 202190 - kinase inhibitor_3.02	0.68				estrogen antagonist	potassium channels	phospholipase inhibitor	n-wasp inhibitor	farnesylation inhibitor	sodium channels	pkc activator	protein glycosylation inhibitor	misc. channels
Y-27632 - kinase inhibitor_4.04	0.68				pkc activator	potassium channels	phospholipase inhibitor	n-wasp inhibitor	estrogen antagonist	er ca++ atpase inhibitor	sodium channels	farnesylation inhibitor	misc. channels
AG-370 - kinase inhibitor_19.3	0.71				vitamin d receptor ligand	adp ribose polymerase inhibitor	pka activator	bioactive lipid	paf receptor ligand	prostaglandin	cannabinoid receptor ligand	voltage-dependent na channel inhibitor	pkc activator
Indirubin - kinase inhibitor_19.1	0.71				bioactive lipid	ppar ligand	paf receptor ligand	cannabinoid receptor ligand	misc. channels	prostaglandin	potassium channels	hsp-90 inhibitor	sodium channels
HA1077 - kinase inhibitor_2.75	0.73				potassium channels	phospholipase inhibitor	farnesylation inhibitor	estrogen antagonist	pkc activator	misc. channels	sodium channels	parp inhibitor	phosphodiesterase inhibitor
K252A - kinase inhibitor_0.0428	0.74				misc. channels	bioactive lipid	steroid hormone	ppar ligand	voltage-dependent na channel inhibitor	cannabinoid receptor ligand	paf receptor ligand	bnos/nos inhibitor	prostaglandin
SB 203580 - kinase inhibitor_13.2	0.77				potassium channels	sodium channels	phospholipase inhibitor	calcium channels	protein glycosylation inhibitor	hif-1 inhibitor	farnesylation inhibitor	ip3 receptor blocker	misc. channels
AG1478 - kinase inhibitor_14.2	0.78				calcineurin inhibitor	prolyl cis-trans isomerase inhibitor	calcium channels	protein glycosylation inhibitor	na+ ionophore	vanilloid receptor ligand	phosphodiesterase inhibitor	ip3 receptor blocker	myosin ii inhibitor
RG-14620 - kinase inhibitor_18.2	0.78				alpha adrenergic agonist	antioxidant	actin poison	calmodulin inhibitor	microtubule poison	no donor	fatty acid biosynthesis inhibitor	inhibitor of mitochondrial na+ca+2 exchange	calcium channels
K252A - kinase inhibitor_0.214	0.79				inhibits dna synthesis	sirt1 activator	inhibits transcription	dhfr inhibitor	nos inhibitor	iron chelator	steroid hormone	ikappab kinase inhibitor	na+k+atpase inhibitor
Rottlerin - kinase inhibitor_9.68	0.79				calmodulin inhibitor	fatty acid biosynthesis inhibitor	mitochondrial uncoupler	alpha adrenergic agonist	lipoxygenase inhibitor	calcium channels	na+ ionophore	induces intracellular acidification	prolyl cis-trans isomerase inhibitor
Tyrphostin 9 - kinase inhibitor_3.54	0.79				na+ ionophore	calmodulin inhibitor	mitochondrial uncoupler	fatty acid biosynthesis inhibitor	calcium channels	protein glycosylation inhibitor	er ca++ atpase inhibitor	actin poison	antioxidant
AG-1296 - kinase inhibitor_0.751	0.81				bnos/nos inhibitor	phosphodiesterase inhibitor	misc. channels	sodium channels	parp inhibitor	inhibits mitochondrial permeability pore opening	potassium channels	ppar ligand	farnesylation inhibitor
H7 - kinase inhibitor_3.43	0.81				phospholipase inhibitor	potassium channels	farnesylation inhibitor	parp inhibitor	sodium channels	pkc activator	misc. channels	ip3 receptor blocker	estrogen antagonist
5-Iodotubercidin - kinase inhibitor_12.8	0.82				na+k+atpase inhibitor	inhibits transcription	inhibits dna synthesis	inhibits protein synthesis	nos inhibitor	sirt1 activator	iron chelator	protease inhibitor	histone deacetylase inhibitor
Genistein - kinase inhibitor_19.2	0.82				inhibits dna synthesis	inhibits transcription	na+k+atpase inhibitor	iron chelator	sirt1 activator	inhibits protein synthesis	nos inhibitor	retinoid receptor ligand	dhfr inhibitor
K252A - kinase inhibitor_1.07	0.82				na+k+atpase inhibitor	inhibits transcription	inhibits dna synthesis	inhibits protein synthesis	iron chelator	nos inhibitor	sirt1 activator	protease inhibitor	induces intracellular acidification
SB-415286 - kinase inhibitor_13.9	0.84				inhibits dna synthesis	iron chelator	nos inhibitor	sirt1 activator	retinoid receptor ligand	protease inhibitor	bcl-2 ligand	inhibits protein synthesis	inhibits transcription
5-Iodotubercidin - kinase inhibitor_0.510	0.85				inhibits dna synthesis	inhibits transcription	sirt1 activator	steroid hormone	iron chelator	dhfr inhibitor	inhibits protein synthesis	fo atp synthase inhibitor	nos inhibitor
Roscovitine - kinase inhibitor_14.1	0.85				inhibits transcription	inhibits dna synthesis	iron chelator	inhibits protein synthesis	sirt1 activator	protease inhibitor	fo atp synthase inhibitor	steroid hormone	na+k+atpase inhibitor
5-Iodotubercidin - kinase inhibitor_2.55	0.86				na+k+atpase inhibitor	inhibits transcription	inhibits dna synthesis	inhibits protein synthesis	iron chelator	nos inhibitor	sirt1 activator	protease inhibitor	histone deacetylase inhibitor
A-3 - kinase inhibitor_17.6	0.86				actin poison	calcium channels	calmodulin inhibitor	fatty acid biosynthesis inhibitor	phosphatase inhibitor	antioxidant	mitochondrial uncoupler	myosin ii inhibitor	protein glycosylation inhibitor
Ro 31-8220 - kinase inhibitor_0.437	0.86				inhibits dna synthesis	sirt1 activator	dhfr inhibitor	iron chelator	inhibits transcription	nos inhibitor	fo atp synthase inhibitor	steroid hormone	inhibits protein synthesis
SP-600125 - kinase inhibitor_22.7	0.86				inhibits dna synthesis	sirt1 activator	inhibits transcription	dhfr inhibitor	iron chelator	steroid hormone	inhibits protein synthesis	fo atp synthase inhibitor	nos inhibitor
Chelerythrine - kinase inhibitor_0.574	0.88				farnesylation inhibitor	misc. channels	potassium channels	phospholipase inhibitor	calcium ionophore	mitochondrial uncoupler	hif-1 inhibitor	sodium channels	phosphodiesterase inhibitor
DRB - kinase inhibitor_15.7	0.89				sirt1 activator	fo atp synthase inhibitor	steroid hormone	inhibits dna synthesis	inhibits transcription	inhibits protein synthesis	iron chelator	protease inhibitor	kinase inhibitor
Go6976 - kinase inhibitor_13.2	0.89				lipoxygenase inhibitor	guanylate cyclase inhibitor	fatty acid biosynthesis inhibitor	alpha adrenergic agonist	induces intracellular acidification	calmodulin inhibitor	calcium ionophore	calcium channels	kinase inhibitor
LY-294002 - kinase inhibitor_16.3	0.89				antioxidant	calcium channels	prolyl cis-trans isomerase inhibitor	calcineurin inhibitor	vanilloid receptor ligand	ip3 receptor blocker	calmodulin inhibitor	protein glycosylation inhibitor	kinase inhibitor
Ro 31-8220 - kinase inhibitor_2.19	0.89				inhibits dna synthesis	inhibits transcription	na+k+atpase inhibitor	sirt1 activator	iron chelator	inhibits protein synthesis	nos inhibitor	histone deacetylase inhibitor	kinase inhibitor
Wortmannin - kinase inhibitor_11.7	0.89				alpha adrenergic agonist	calmodulin inhibitor	actin poison	fatty acid biosynthesis inhibitor	antioxidant	phosphatase inhibitor	calcium channels	mitochondrial uncoupler	kinase inhibitor
Wortmannin - kinase inhibitor_2.33	0.89				phospholipase inhibitor	calcineurin inhibitor	calcium channels	vanilloid receptor ligand	estrogen antagonist	potassium channels	ip3 receptor blocker	eg5 inhibitor	kinase inhibitor
Piceatannol - kinase inhibitor_4.09	0.9				vanilloid receptor ligand	eg5 inhibitor	calcium channels	ip3 receptor blocker	hif-1 inhibitor	phospholipase inhibitor	estrogen antagonist	kinase inhibitor	phosphodiesterase inhibitor
SB-431542 - kinase inhibitor_13.0	0.9				calcium channels	ip3 receptor blocker	hif-1 inhibitor	vanilloid receptor ligand	phosphatase inhibitor	protein glycosylation inhibitor	antioxidant	kinase inhibitor	sodium channels
SP-600125 - kinase inhibitor_0.908	0.9				bnos/nos inhibitor	phosphodiesterase inhibitor	misc. channels	inhibits mitochondrial permeability pore opening	ppar ligand	sodium channels	parp inhibitor	kinase inhibitor	farnesylation inhibitor
HA-1004 - kinase inhibitor_3.41	0.92				vanilloid receptor ligand	phosphodiesterase inhibitor	eg5 inhibitor	calcium channels	farnesylation inhibitor	ppar ligand	kinase inhibitor	misc. channels	inhibits mitochondrial permeability pore opening
Indirubin-3'-monoxime - kinase inhibitor_18.0	0.92				induces intracellular acidification	guanylate cyclase inhibitor	inhibits protein synthesis	no donor	na+k+atpase inhibitor	lipoxygenase inhibitor	kinase inhibitor	calcium ionophore	protease inhibitor
N9-Isopropylolomoucine - kinase inhibitor_15.3	0.92				fo atp synthase inhibitor	sirt1 activator	inhibits dna synthesis	ikappab kinase inhibitor	protease inhibitor	ap-1 inhibitor	kinase inhibitor	bcl-2 ligand	inhibits protein synthesis
Olomoucine - kinase inhibitor_16.8	0.92				fo atp synthase inhibitor	sirt1 activator	ap-1 inhibitor	protease inhibitor	bcl-2 ligand	nos inhibitor	kinase inhibitor	inhibits dna synthesis	ikappab kinase inhibitor
Roscovitine - kinase inhibitor_2.82	0.92				sirt1 activator	fo atp synthase inhibitor	nos inhibitor	dhfr inhibitor	ap-1 inhibitor	protease inhibitor	kinase inhibitor	inhibits dna synthesis	ppar ligand
5-Iodotubercidin - kinase inhibitor_0.102	0.93				hsp-90 inhibitor	nos inhibitor	microtubule poison	ppar ligand	histone deacetylase inhibitor	kinase inhibitor	protease inhibitor	fo atp synthase inhibitor	bcl-2 ligand
AG-1296 - kinase inhibitor_3.76	0.93				bnos/nos inhibitor	phosphodiesterase inhibitor	misc. channels	parp inhibitor	inhibits mitochondrial permeability pore opening	kinase inhibitor	sodium channels	hif-1 inhibitor	ppar ligand
GF-109203X - kinase inhibitor_12.1	0.93				inhibits dna synthesis	protease inhibitor	nos inhibitor	inhibits protein synthesis	fatty acid biosynthesis inhibitor	kinase inhibitor	dna binding	alpha adrenergic agonist	bcl-2 ligand
PP1 - kinase inhibitor_3.55	0.93				calcium channels	hif-1 inhibitor	phospholipase inhibitor	calmodulin inhibitor	fatty acid biosynthesis inhibitor	kinase inhibitor	sodium channels	mitochondrial uncoupler	farnesylation inhibitor
SU-4312 - kinase inhibitor_18.9	0.93				microtubule poison	hsp-90 inhibitor	histone deacetylase inhibitor	nos inhibitor	phosphatase inhibitor	kinase inhibitor	ppar ligand	no donor	alpha adrenergic agonist
GW-5074 - kinase inhibitor_1.92	0.95				phosphodiesterase inhibitor	bnos/nos inhibitor	inhibits mitochondrial permeability pore opening	hif-1 inhibitor	kinase inhibitor	misc. channels	parp inhibitor	fo atp synthase inhibitor	farnesylation inhibitor
H7 - kinase inhibitor_17.2	0.95				lipoxygenase inhibitor	fatty acid biosynthesis inhibitor	inhibits protein synthesis	protease inhibitor	kinase inhibitor	calmodulin inhibitor	dna binding	fo atp synthase inhibitor	mitochondrial uncoupler
PD 98059 - kinase inhibitor_3.74	0.95				hif-1 inhibitor	inhibits mitochondrial permeability pore opening	phosphodiesterase inhibitor	fo atp synthase inhibitor	kinase inhibitor	mitochondrial uncoupler	vanilloid receptor ligand	ap-1 inhibitor	eg5 inhibitor
SU-4312 - kinase inhibitor_3.78	0.95				microtubule poison	hsp-90 inhibitor	histone deacetylase inhibitor	nos inhibitor	kinase inhibitor	no donor	ppar ligand	phosphatase inhibitor	protease inhibitor
Tyrphostin 9 - kinase inhibitor_0.708	0.95				mitochondrial uncoupler	hif-1 inhibitor	phosphodiesterase inhibitor	misc. channels	kinase inhibitor	inhibits mitochondrial permeability pore opening	calcineurin inhibitor	farnesylation inhibitor	bnos/nos inhibitor
Genistein - kinase inhibitor_3.84	0.96				phosphodiesterase inhibitor	bnos/nos inhibitor	inhibits mitochondrial permeability pore opening	kinase inhibitor	hif-1 inhibitor	fo atp synthase inhibitor	parp inhibitor	misc. channels	farnesylation inhibitor
PP2 - kinase inhibitor_3.31	0.96				hif-1 inhibitor	calcium channels	phosphodiesterase inhibitor	kinase inhibitor	phospholipase inhibitor	farnesylation inhibitor	mitochondrial uncoupler	protein glycosylation inhibitor	estrogen antagonist
RG-14620 - kinase inhibitor_3.63	0.96				microtubule poison	hsp-90 inhibitor	histone deacetylase inhibitor	kinase inhibitor	nos inhibitor	protease inhibitor	ppar ligand	no donor	calcium channels
Tyrphostin AG-126 - kinase inhibitor_23.2	0.96				fo atp synthase inhibitor	protease inhibitor	bcl-2 ligand	kinase inhibitor	sirt1 activator	nos inhibitor	ap-1 inhibitor	inhibits protein synthesis	inhibits dna synthesis
AG-1296 - kinase inhibitor_18.8	0.97				phosphodiesterase inhibitor	bnos/nos inhibitor	kinase inhibitor	hif-1 inhibitor	misc. channels	inhibits mitochondrial permeability pore opening	sodium channels	fo atp synthase inhibitor	parp inhibitor
AG-879 - kinase inhibitor_3.16	0.97				calcineurin inhibitor	phosphodiesterase inhibitor	kinase inhibitor	fo atp synthase inhibitor	prolyl cis-trans isomerase inhibitor	inhibits mitochondrial permeability pore opening	calcium channels	protease inhibitor	mitochondrial uncoupler
Calphostin C - kinase inhibitor_0.632	0.97				phosphodiesterase inhibitor	fo atp synthase inhibitor	kinase inhibitor	calcineurin inhibitor	inhibits protein synthesis	protease inhibitor	inhibits mitochondrial permeability pore opening	mitochondrial uncoupler	prolyl cis-trans isomerase inhibitor
Damnacanthal - kinase inhibitor_17.7	0.97				sirt1 activator	fo atp synthase inhibitor	kinase inhibitor	dhfr inhibitor	ap-1 inhibitor	protease inhibitor	nos inhibitor	inhibits mitochondrial permeability pore opening	inhibits dna synthesis
H9 - kinase inhibitor_15.4	0.97				protease inhibitor	inhibits protein synthesis	kinase inhibitor	fatty acid biosynthesis inhibitor	dna binding	fo atp synthase inhibitor	lipoxygenase inhibitor	bcl-2 ligand	nos inhibitor
Indirubin-3'-monoxime - kinase inhibitor_3.61	0.97				histone deacetylase inhibitor	fo atp synthase inhibitor	kinase inhibitor	ikappab kinase inhibitor	microtubule poison	hsp-90 inhibitor	nos inhibitor	ap-1 inhibitor	protease inhibitor
Piceatannol - kinase inhibitor_20.5	0.97				fo atp synthase inhibitor	ap-1 inhibitor	kinase inhibitor	prolyl cis-trans isomerase inhibitor	calcineurin inhibitor	hif-1 inhibitor	protease inhibitor	nos inhibitor	inhibits mitochondrial permeability pore opening
Quercetin - kinase inhibitor_14.8	0.97				fo atp synthase inhibitor	sirt1 activator	kinase inhibitor	calcineurin inhibitor	protease inhibitor	ap-1 inhibitor	hif-1 inhibitor	inhibits mitochondrial permeability pore opening	prolyl cis-trans isomerase inhibitor
Rottlerin - kinase inhibitor_1.94	0.97				mitochondrial uncoupler	calcineurin inhibitor	kinase inhibitor	calcium channels	prolyl cis-trans isomerase inhibitor	phosphodiesterase inhibitor	hif-1 inhibitor	fo atp synthase inhibitor	protease inhibitor
SP-600125 - kinase inhibitor_4.54	0.97				fo atp synthase inhibitor	sirt1 activator	kinase inhibitor	hif-1 inhibitor	steroid hormone	inhibits dna synthesis	nos inhibitor	inhibits mitochondrial permeability pore opening	protease inhibitor
Tyrphostin AG-825 - kinase inhibitor_12.6	0.97				fatty acid biosynthesis inhibitor	alpha adrenergic agonist	kinase inhibitor	fo atp synthase inhibitor	protease inhibitor	dna binding	mitochondrial uncoupler	bcl-2 ligand	calmodulin inhibitor
GF-109203X - kinase inhibitor_2.42	0.99				sirt1 activator	kinase inhibitor	dna binding	inhibits dna synthesis	parp inhibitor	fo atp synthase inhibitor	phospholipase inhibitor	farnesylation inhibitor	iron chelator
GW-5074 - kinase inhibitor_9.60	0.99				fo atp synthase inhibitor	kinase inhibitor	inhibits mitochondrial permeability pore opening	phosphodiesterase inhibitor	parp inhibitor	ppar ligand	sirt1 activator	hif-1 inhibitor	calcineurin inhibitor
Go6976 - kinase inhibitor_2.64	0.99				dna binding	kinase inhibitor	fatty acid biosynthesis inhibitor	phospholipase inhibitor	calcium channels	sodium channels	protease inhibitor	estrogen antagonist	farnesylation inhibitor
H9 - kinase inhibitor_3.08	0.99				ppar ligand	kinase inhibitor	fo atp synthase inhibitor	estrogen antagonist	phospholipase inhibitor	farnesylation inhibitor	misc. channels	inhibits mitochondrial permeability pore opening	calcineurin inhibitor
HBDDE - kinase inhibitor_14.8	0.99				ppar ligand	kinase inhibitor	farnesylation inhibitor	misc. channels	nos inhibitor	sodium channels	fo atp synthase inhibitor	inhibits mitochondrial permeability pore opening	sirt1 activator
Quercetin - kinase inhibitor_2.96	0.99				histone deacetylase inhibitor	kinase inhibitor	fo atp synthase inhibitor	hsp-90 inhibitor	microtubule poison	protease inhibitor	nos inhibitor	ppar ligand	ap-1 inhibitor
AG-490 - kinase inhibitor_17.0	1				kinase inhibitor	sirt1 activator	fo atp synthase inhibitor	ppar ligand	misc. channels	nos inhibitor	hif-1 inhibitor	inhibits mitochondrial permeability pore opening	ap-1 inhibitor
Calphostin C - kinase inhibitor_0.126	1				kinase inhibitor	mitochondrial uncoupler	hif-1 inhibitor	calcium channels	ppar ligand	misc. channels	phosphodiesterase inhibitor	sodium channels	protease inhibitor
Go6976 - kinase inhibitor_0.529	1				kinase inhibitor	farnesylation inhibitor	phosphodiesterase inhibitor	calcium channels	phosphatase inhibitor	sodium channels	phospholipase inhibitor	potassium channels	misc. channels
HA-1004 - kinase inhibitor_17.0	1				kinase inhibitor	hsp-90 inhibitor	ppar ligand	nos inhibitor	protease inhibitor	fo atp synthase inhibitor	microtubule poison	calcium channels	ap-1 inhibitor
HA1077 - kinase inhibitor_13.7	1				kinase inhibitor	fo atp synthase inhibitor	calcineurin inhibitor	calcium channels	prolyl cis-trans isomerase inhibitor	ip3 receptor blocker	phospholipase inhibitor	hif-1 inhibitor	mitochondrial uncoupler
PD 98059 - kinase inhibitor_18.7	1				kinase inhibitor	calcineurin inhibitor	hif-1 inhibitor	phosphodiesterase inhibitor	inhibits mitochondrial permeability pore opening	calcium channels	vanilloid receptor ligand	ip3 receptor blocker	eg5 inhibitor
lipoxygenase inhibitor	1
BW-B 70C - lipoxygenase inhibitor_15.8	1				lipoxygenase inhibitor	guanylate cyclase inhibitor	calcium ionophore	calmodulin inhibitor	induces intracellular acidification	inhibitor of mitochondrial na+ca+2 exchange	calcium channels	antioxidant	dopamine antagonist
CDC - lipoxygenase inhibitor_15.6	1				lipoxygenase inhibitor	fatty acid biosynthesis inhibitor	inhibits protein synthesis	induces intracellular acidification	protease inhibitor	calmodulin inhibitor	ionophore	mitochondrial uncoupler	antioxidant
microtubule poison	1
Nocodazole - microtubule poison_0.664	0.99				nos inhibitor	microtubule poison	ap-1 inhibitor	protease inhibitor	fo atp synthase inhibitor	hsp-90 inhibitor	no donor	inhibits protein synthesis	histone deacetylase inhibitor
Estradiol - microtubule poison_18.4	1				microtubule poison	hsp-90 inhibitor	histone deacetylase inhibitor	nos inhibitor	no donor	kinase inhibitor	protease inhibitor	ppar ligand	bcl-2 ligand
Estradiol - microtubule poison_3.67	1				microtubule poison	hsp-90 inhibitor	histone deacetylase inhibitor	phosphatase inhibitor	no donor	kinase inhibitor	nos inhibitor	inhibitor of mitochondrial na+ca+2 exchange	calcium channels
Nocodazole - microtubule poison_0.133	1				microtubule poison	hsp-90 inhibitor	histone deacetylase inhibitor	nos inhibitor	phosphatase inhibitor	protease inhibitor	ap-1 inhibitor	no donor	kinase inhibitor
Nocodazole - microtubule poison_16.6	1				microtubule poison	no donor	hsp-90 inhibitor	nos inhibitor	histone deacetylase inhibitor	kinase inhibitor	protease inhibitor	ppar ligand	phosphatase inhibitor
Nocodazole - microtubule poison_3.32	1				microtubule poison	no donor	nos inhibitor	hsp-90 inhibitor	histone deacetylase inhibitor	protease inhibitor	kinase inhibitor	phosphatase inhibitor	fo atp synthase inhibitor
Taxol = Paclitaxel - microtubule poison_0.0468	1				microtubule poison	hsp-90 inhibitor	histone deacetylase inhibitor	phosphatase inhibitor	nos inhibitor	kinase inhibitor	protease inhibitor	ppar ligand	ap-1 inhibitor
Taxol = Paclitaxel - microtubule poison_0.234	1				microtubule poison	hsp-90 inhibitor	histone deacetylase inhibitor	nos inhibitor	phosphatase inhibitor	protease inhibitor	kinase inhibitor	ppar ligand	no donor
Taxol = Paclitaxel - microtubule poison_1.17	1				microtubule poison	hsp-90 inhibitor	histone deacetylase inhibitor	no donor	inhibitor of mitochondrial na+ca+2 exchange	nos inhibitor	dna binding	phosphatase inhibitor	protease inhibitor
Taxol = Paclitaxel - microtubule poison_5.86	1				microtubule poison	hsp-90 inhibitor	histone deacetylase inhibitor	phosphatase inhibitor	ppar ligand	nos inhibitor	no donor	inhibitor of mitochondrial na+ca+2 exchange	kinase inhibitor
Vinblastine - microtubule poison_0.0440	1				microtubule poison	nos inhibitor	no donor	hsp-90 inhibitor	ap-1 inhibitor	protease inhibitor	fo atp synthase inhibitor	histone deacetylase inhibitor	mitochondrial uncoupler
Vinblastine - microtubule poison_0.220	1				microtubule poison	hsp-90 inhibitor	nos inhibitor	no donor	ap-1 inhibitor	histone deacetylase inhibitor	phosphatase inhibitor	protease inhibitor	kinase inhibitor
Vinblastine - microtubule poison_1.10	1				microtubule poison	inhibitor of mitochondrial na+ca+2 exchange	histone deacetylase inhibitor	no donor	hsp-90 inhibitor	dna binding	calcium channels	antioxidant	fatty acid biosynthesis inhibitor
Vinblastine - microtubule poison_5.50	1				microtubule poison	inhibitor of mitochondrial na+ca+2 exchange	antioxidant	actin poison	no donor	hsp-90 inhibitor	histone deacetylase inhibitor	alpha adrenergic agonist	phosphatase inhibitor
misc. channels	0.87
Fipronil - Misc. channels_11.4	0.77				protease inhibitor	mitochondrial uncoupler	inhibits protein synthesis	kinase inhibitor	fo atp synthase inhibitor	induces intracellular acidification	calcium channels	phosphodiesterase inhibitor	nos inhibitor
Niflumic acid - Misc. channels_0.709	0.86				vitamin d receptor ligand	adp ribose polymerase inhibitor	prostaglandin	pka activator	bioactive lipid	paf receptor ligand	cannabinoid receptor ligand	voltage-dependent na channel inhibitor	pkc activator
Niflumic acid - Misc. channels_17.7	0.97				phosphodiesterase inhibitor	bnos/nos inhibitor	misc. channels	inhibits mitochondrial permeability pore opening	hif-1 inhibitor	kinase inhibitor	calcium channels	sodium channels	ip3 receptor blocker
mitochondrial uncoupler	0.98
FCCP - mitochondrial uncoupler_19.7	0.89				dopamine antagonist	guanylate cyclase inhibitor	activates heterotrimeriuc gtpases	no donor	induces intracellular acidification	calcium ionophore	lipoxygenase inhibitor	calmodulin inhibitor	mitochondrial uncoupler
FCCP - mitochondrial uncoupler_3.93	0.97				calmodulin inhibitor	fatty acid biosynthesis inhibitor	mitochondrial uncoupler	er ca++ atpase inhibitor	na+ ionophore	calcium channels	protein glycosylation inhibitor	actin poison	antioxidant
Valinomycin - mitochondrial uncoupler_4.50	0.97				calmodulin inhibitor	fatty acid biosynthesis inhibitor	mitochondrial uncoupler	prolyl cis-trans isomerase inhibitor	na+ ionophore	calcium channels	calcineurin inhibitor	antioxidant	alpha adrenergic agonist
FCCP - mitochondrial uncoupler_0.787	1				mitochondrial uncoupler	phosphodiesterase inhibitor	hif-1 inhibitor	misc. channels	inhibits mitochondrial permeability pore opening	calcineurin inhibitor	kinase inhibitor	fo atp synthase inhibitor	prolyl cis-trans isomerase inhibitor
Valinomycin - mitochondrial uncoupler_0.0360	1				mitochondrial uncoupler	kinase inhibitor	misc. channels	fo atp synthase inhibitor	phosphodiesterase inhibitor	hif-1 inhibitor	inhibits mitochondrial permeability pore opening	farnesylation inhibitor	ppar ligand
Valinomycin - mitochondrial uncoupler_0.180	1				mitochondrial uncoupler	kinase inhibitor	misc. channels	hif-1 inhibitor	phosphodiesterase inhibitor	fo atp synthase inhibitor	inhibits mitochondrial permeability pore opening	farnesylation inhibitor	ppar ligand
Valinomycin - mitochondrial uncoupler_0.900	1				mitochondrial uncoupler	fo atp synthase inhibitor	protease inhibitor	kinase inhibitor	calcineurin inhibitor	calcium channels	prolyl cis-trans isomerase inhibitor	fatty acid biosynthesis inhibitor	ap-1 inhibitor
myosin ii inhibitor	1
Blebbistatin - myosin II inhibitor_17.1	1				myosin ii inhibitor	calcium channels	actin poison	protein glycosylation inhibitor	calmodulin inhibitor	vanilloid receptor ligand	na+ ionophore	arf gef inhibitor	potassium channels
n-wasp inhibitor	1
Wiskostatin - N-WASP inhibitor _2.35	1				n-wasp inhibitor	er ca++ atpase inhibitor	protein glycosylation inhibitor	phospholipase inhibitor	potassium channels	estrogen antagonist	sphingosine kinase inhibitor	na+ ionophore	pkc activator
na+ ionophore	1
Monensin - Na+ ionophore_1.44	1				na+ ionophore	protein glycosylation inhibitor	er ca++ atpase inhibitor	calcineurin inhibitor	calcium channels	prolyl cis-trans isomerase inhibitor	mitochondrial uncoupler	calmodulin inhibitor	n-wasp inhibitor
Monensin - Na+ ionophore_7.22	1				na+ ionophore	protein glycosylation inhibitor	calmodulin inhibitor	prolyl cis-trans isomerase inhibitor	calcineurin inhibitor	calcium channels	actin poison	arf gef inhibitor	mitochondrial uncoupler
na+k+atpase inhibitor	1
Ouabain - Na+K+ATPase inhibitor_0.0684	1				na+k+atpase inhibitor	inhibits protein synthesis	inhibits transcription	inhibits dna synthesis	nos inhibitor	induces intracellular acidification	iron chelator	protease inhibitor	kinase inhibitor
Ouabain - Na+K+ATPase inhibitor_0.342	1				na+k+atpase inhibitor	inhibits transcription	inhibits protein synthesis	inhibits dna synthesis	nos inhibitor	induces intracellular acidification	protease inhibitor	iron chelator	histone deacetylase inhibitor
Ouabain - Na+K+ATPase inhibitor_1.71	1				na+k+atpase inhibitor	inhibits transcription	inhibits protein synthesis	inhibits dna synthesis	nos inhibitor	induces intracellular acidification	protease inhibitor	histone deacetylase inhibitor	iron chelator
Ouabain - Na+K+ATPase inhibitor_8.55	1				na+k+atpase inhibitor	inhibits transcription	inhibits protein synthesis	inhibits dna synthesis	induces intracellular acidification	nos inhibitor	protease inhibitor	guanylate cyclase inhibitor	histone deacetylase inhibitor
nfkappab inhibitor	1
Curcumin - NFkappaB inhibitor_13.6	1				nfkappab inhibitor	actin poison	calmodulin inhibitor	calcium ionophore	phosphatase inhibitor	vacuolar atpase inhibitor	inhibitor of mitochondrial na+ca+2 exchange	myosin ii inhibitor	guanylate cyclase inhibitor
no donor	0.86
Furoxan - NO donor_5.34	0.77				nos inhibitor	hsp-90 inhibitor	histone deacetylase inhibitor	fo atp synthase inhibitor	microtubule poison	protease inhibitor	sirt1 activator	inhibits dna synthesis	kinase inhibitor
Furoxan - NO donor_26.7	0.96				activates heterotrimeriuc gtpases	guanylate cyclase inhibitor	dopamine antagonist	no donor	pin1 inhibitor	calcium ionophore	lipoxygenase inhibitor	calmodulin inhibitor	inhibitor of mitochondrial na+ca+2 exchange
nos inhibitor	0.9
Bromo-7-nitroindazole [3-Bromo-7-nitroindazole] - NOS inhibitor_20.7	0.71				phosphodiesterase inhibitor	bnos/nos inhibitor	sodium channels	misc. channels	kinase inhibitor	calcium channels	hif-1 inhibitor	ppar ligand	farnesylation inhibitor
Diphenyleneiodonium Cl - NOS inhibitor_17.9	0.84				no donor	guanylate cyclase inhibitor	induces intracellular acidification	dopamine antagonist	lipoxygenase inhibitor	activates heterotrimeriuc gtpases	ionophore	fatty acid biosynthesis inhibitor	mitochondrial uncoupler
Diphenyleneiodonium Cl - NOS inhibitor_0.143	0.99				ppar ligand	nos inhibitor	kinase inhibitor	fo atp synthase inhibitor	inhibits mitochondrial permeability pore opening	sirt1 activator	ap-1 inhibitor	misc. channels	hsp-90 inhibitor
Diphenyleneiodonium Cl - NOS inhibitor_0.717	0.99				microtubule poison	nos inhibitor	hsp-90 inhibitor	histone deacetylase inhibitor	protease inhibitor	inhibits dna synthesis	ap-1 inhibitor	kinase inhibitor	ppar ligand
Diphenyleneiodonium Cl - NOS inhibitor_3.58	0.99				protease inhibitor	nos inhibitor	fo atp synthase inhibitor	inhibits protein synthesis	dna binding	bcl-2 ligand	kinase inhibitor	mitochondrial uncoupler	fatty acid biosynthesis inhibitor
paf receptor ligand	0.93
PAF C18:1 - PAF receptor ligand_0.200	0.92				calcium channels	phosphatase inhibitor	sodium channels	myosin ii inhibitor	vanilloid receptor ligand	antioxidant	paf receptor ligand	potassium channels	ppar ligand
PAF C16 - PAF receptor ligand_0.00800	0.93				adp ribose polymerase inhibitor	vitamin d receptor ligand	prostaglandin	pka activator	bioactive lipid	paf receptor ligand	cannabinoid receptor ligand	voltage-dependent na channel inhibitor	pkc activator
PAF C18:1 - PAF receptor ligand_0.0400	0.93				adp ribose polymerase inhibitor	vitamin d receptor ligand	bioactive lipid	pka activator	prostaglandin	paf receptor ligand	cannabinoid receptor ligand	voltage-dependent na channel inhibitor	pkc activator
parp inhibitor	0.97
Phenanthridinone [6(5H)-Phenanthridinone] - PARP inhibitor_25.6	0.89				phosphodiesterase inhibitor	hif-1 inhibitor	kinase inhibitor	ip3 receptor blocker	calcium channels	sodium channels	calcineurin inhibitor	inhibits mitochondrial permeability pore opening	parp inhibitor
Phenanthridinone [6(5H)-Phenanthridinone] - PARP inhibitor_5.12	0.97				phosphodiesterase inhibitor	hif-1 inhibitor	parp inhibitor	bnos/nos inhibitor	kinase inhibitor	ip3 receptor blocker	sodium channels	calcium channels	farnesylation inhibitor
Amino-1;8-naphthalimide [4-Amino-1;8-naphthalimide] - PARP inhibitor_23.6	1				parp inhibitor	cannabinoid receptor ligand	bioactive lipid	prostaglandin	paf receptor ligand	misc. channels	sodium channels	pka activator	vitamin d receptor ligand
Amino-1;8-naphthalimide [4-Amino-1;8-naphthalimide] - PARP inhibitor_4.71	1				parp inhibitor	cannabinoid receptor ligand	misc. channels	ppar ligand	bioactive lipid	sodium channels	paf receptor ligand	potassium channels	prostaglandin
phosphatase inhibitor	0.9
CinnGEL 2Me - phosphatase inhibitor_1.93	0.71				inhibits mitochondrial permeability pore opening	ppar ligand	fo atp synthase inhibitor	kinase inhibitor	phosphodiesterase inhibitor	bnos/nos inhibitor	calcineurin inhibitor	hif-1 inhibitor	ap-1 inhibitor
RK-682 - phosphatase inhibitor_13.6	0.74				potassium channels	protein glycosylation inhibitor	n-wasp inhibitor	calcium ionophore	calcium channels	antioxidant	phospholipase inhibitor	vanilloid receptor ligand	calmodulin inhibitor
RWJ-60475-(AM)3 - phosphatase inhibitor_8.06	0.85				lipoxygenase inhibitor	calmodulin inhibitor	fatty acid biosynthesis inhibitor	calcium ionophore	calcium channels	induces intracellular acidification	guanylate cyclase inhibitor	mitochondrial uncoupler	antioxidant
Cantharidin - phosphatase inhibitor_0.204	1				phosphatase inhibitor	ppar ligand	eg5 inhibitor	hsp-90 inhibitor	farnesylation inhibitor	calcium channels	histone deacetylase inhibitor	kinase inhibitor	phospholipase inhibitor
Cantharidin - phosphatase inhibitor_1.02	1				phosphatase inhibitor	no donor	actin poison	microtubule poison	calcium ionophore	hsp-90 inhibitor	guanylate cyclase inhibitor	calcium channels	calmodulin inhibitor
NSC-95397 - phosphatase inhibitor_0.644	1				phosphatase inhibitor	farnesylation inhibitor	kinase inhibitor	nos inhibitor	calcium channels	mitochondrial uncoupler	actin poison	phospholipase inhibitor	sodium channels
Okadaic acid - phosphatase inhibitor_0.0248	1				phosphatase inhibitor	hsp-90 inhibitor	histone deacetylase inhibitor	calcium channels	kinase inhibitor	microtubule poison	actin poison	nos inhibitor	ap-1 inhibitor
phosphodiesterase inhibitor	0.95
EHNA HCl - phosphodiesterase inhibitor_3.61	0.66				vitamin d receptor ligand	adp ribose polymerase inhibitor	bioactive lipid	pka activator	prostaglandin	cannabinoid receptor ligand	paf receptor ligand	pkc activator	voltage-dependent na channel inhibitor
Trequinsin - phosphodiesterase inhibitor_12.3	0.86				calcium channels	vanilloid receptor ligand	induces intracellular acidification	inhibitor of mitochondrial na+ca+2 exchange	protease inhibitor	mitochondrial uncoupler	calcineurin inhibitor	antioxidant	prolyl cis-trans isomerase inhibitor
Vinpocetine - phosphodiesterase inhibitor_14.3	0.92				induces intracellular acidification	mitochondrial uncoupler	protease inhibitor	inhibits protein synthesis	ionophore	kinase inhibitor	phosphodiesterase inhibitor	calcium channels	fo atp synthase inhibitor
MY-5445 - phosphodiesterase inhibitor_15.1	0.93				calcium channels	na+ ionophore	calmodulin inhibitor	induces intracellular acidification	mitochondrial uncoupler	phosphodiesterase inhibitor	vanilloid receptor ligand	calcineurin inhibitor	protein glycosylation inhibitor
MBCQ - phosphodiesterase inhibitor_3.19	0.99				bnos/nos inhibitor	phosphodiesterase inhibitor	sodium channels	inhibits mitochondrial permeability pore opening	farnesylation inhibitor	parp inhibitor	misc. channels	calcium channels	ppar ligand
Dipyridamole - phosphodiesterase inhibitor_1.98	1				phosphodiesterase inhibitor	bnos/nos inhibitor	inhibits mitochondrial permeability pore opening	kinase inhibitor	misc. channels	hif-1 inhibitor	fo atp synthase inhibitor	calcium channels	vanilloid receptor ligand
Dipyridamole - phosphodiesterase inhibitor_9.91	1				phosphodiesterase inhibitor	bnos/nos inhibitor	calcium channels	vanilloid receptor ligand	calcineurin inhibitor	prolyl cis-trans isomerase inhibitor	inhibits mitochondrial permeability pore opening	kinase inhibitor	hif-1 inhibitor
Ro 20-1724 - phosphodiesterase inhibitor_18.0	1				phosphodiesterase inhibitor	calcium channels	bnos/nos inhibitor	hif-1 inhibitor	calcineurin inhibitor	kinase inhibitor	sodium channels	prolyl cis-trans isomerase inhibitor	ip3 receptor blocker
Ro 20-1724 - phosphodiesterase inhibitor_3.59	1				phosphodiesterase inhibitor	bnos/nos inhibitor	misc. channels	inhibits mitochondrial permeability pore opening	hif-1 inhibitor	sodium channels	eg5 inhibitor	vanilloid receptor ligand	farnesylation inhibitor
Zardaverine - phosphodiesterase inhibitor_0.149	1				phosphodiesterase inhibitor	bnos/nos inhibitor	sodium channels	misc. channels	hif-1 inhibitor	inhibits mitochondrial permeability pore opening	ip3 receptor blocker	parp inhibitor	calcium channels
Zardaverine - phosphodiesterase inhibitor_0.746	1				phosphodiesterase inhibitor	bnos/nos inhibitor	misc. channels	sodium channels	inhibits mitochondrial permeability pore opening	parp inhibitor	hif-1 inhibitor	kinase inhibitor	ip3 receptor blocker
Zardaverine - phosphodiesterase inhibitor_18.6	1				phosphodiesterase inhibitor	bnos/nos inhibitor	sodium channels	calcium channels	kinase inhibitor	hif-1 inhibitor	misc. channels	vanilloid receptor ligand	inhibits mitochondrial permeability pore opening
Zardaverine - phosphodiesterase inhibitor_3.73	1				phosphodiesterase inhibitor	bnos/nos inhibitor	inhibits mitochondrial permeability pore opening	misc. channels	kinase inhibitor	calcineurin inhibitor	hif-1 inhibitor	ip3 receptor blocker	vanilloid receptor ligand
phospholipase inhibitor	0.92
Aristolochic acid - phospholipase inhibitor_14.7	0.66				sirt1 activator	dhfr inhibitor	iron chelator	inhibits dna synthesis	steroid hormone	nos inhibitor	fo atp synthase inhibitor	inhibits protein synthesis	kinase inhibitor
Manoalide - phospholipase inhibitor_2.40	0.96				kinase inhibitor	fo atp synthase inhibitor	inhibits mitochondrial permeability pore opening	phospholipase inhibitor	calcineurin inhibitor	mitochondrial uncoupler	protease inhibitor	phosphodiesterase inhibitor	hif-1 inhibitor
OBAA - phospholipase inhibitor_11.7	0.96				integrin inhibitor	sphingosine kinase inhibitor	actin poison	phospholipase inhibitor	n-wasp inhibitor	potassium channels	protein glycosylation inhibitor	arf gef inhibitor	er ca++ atpase inhibitor
OBAA - phospholipase inhibitor_2.33	1				phospholipase inhibitor	potassium channels	n-wasp inhibitor	pkc activator	integrin inhibitor	er ca++ atpase inhibitor	estrogen antagonist	farnesylation inhibitor	protein glycosylation inhibitor
U73122 - phospholipase inhibitor_10.8	1				phospholipase inhibitor	potassium channels	sodium channels	estrogen antagonist	calcium channels	ip3 receptor blocker	farnesylation inhibitor	n-wasp inhibitor	antioxidant
pin1 inhibitor	1
Juglone - PIN1 inhibitor_28.7	1				pin1 inhibitor	dopamine antagonist	activates heterotrimeriuc gtpases	calcium ionophore	arf gef inhibitor	protein glycosylation inhibitor	calmodulin inhibitor	vacuolar atpase inhibitor	actin poison
pka activator	1
Bromo-cAMP [8-Bromo-cAMP] - PKA activator _0.0980	1				pka activator	vitamin d receptor ligand	adp ribose polymerase inhibitor	prostaglandin	bioactive lipid	paf receptor ligand	cannabinoid receptor ligand	pkc activator	potassium channels
pkc activator	1
Phorbol 12 myristate 13 acetate - PKC activator_1.62	1				pkc activator	potassium channels	phospholipase inhibitor	bioactive lipid	misc. channels	estrogen antagonist	sodium channels	farnesylation inhibitor	n-wasp inhibitor
potassium channels	0.82
NS-1619 - Potassium channels_13.8	0.62				activates heterotrimeriuc gtpases	dopamine antagonist	guanylate cyclase inhibitor	calcium ionophore	pin1 inhibitor	lipoxygenase inhibitor	vacuolar atpase inhibitor	induces intracellular acidification	arf gef inhibitor
Paxilline - Potassium channels_11.5	0.7				calcium channels	na+ ionophore	vanilloid receptor ligand	antioxidant	myosin ii inhibitor	inhibitor of mitochondrial na+ca+2 exchange	protein glycosylation inhibitor	calmodulin inhibitor	er ca++ atpase inhibitor
Fluspiriline - Potassium channels_2.10	0.74				calcium channels	calmodulin inhibitor	fatty acid biosynthesis inhibitor	mitochondrial uncoupler	kinase inhibitor	vanilloid receptor ligand	calcineurin inhibitor	phospholipase inhibitor	inhibits mitochondrial permeability pore opening
Propafenone - Potassium channels_2.93	0.82				bnos/nos inhibitor	phosphodiesterase inhibitor	misc. channels	inhibits mitochondrial permeability pore opening	farnesylation inhibitor	sodium channels	hif-1 inhibitor	parp inhibitor	ppar ligand
NS-1619 - Potassium channels_0.110	0.88				vitamin d receptor ligand	adp ribose polymerase inhibitor	prostaglandin	pka activator	bioactive lipid	paf receptor ligand	cannabinoid receptor ligand	voltage-dependent na channel inhibitor	pkc activator
Penitrem A - Potassium channels_0.315	0.88				vitamin d receptor ligand	adp ribose polymerase inhibitor	pka activator	bioactive lipid	prostaglandin	paf receptor ligand	cannabinoid receptor ligand	voltage-dependent na channel inhibitor	pkc activator
Phentolamine - Potassium channels_0.711	0.88				adp ribose polymerase inhibitor	vitamin d receptor ligand	prostaglandin	bioactive lipid	pka activator	paf receptor ligand	cannabinoid receptor ligand	voltage-dependent na channel inhibitor	pkc activator
AM 92016 - Potassium channels_10.3	0.89				calcium channels	myosin ii inhibitor	vanilloid receptor ligand	calmodulin inhibitor	na+ ionophore	protein glycosylation inhibitor	calcineurin inhibitor	ip3 receptor blocker	potassium channels
Pinacidil - Potassium channels_20.4	1				potassium channels	prostaglandin	ppar ligand	bioactive lipid	phospholipase inhibitor	cannabinoid receptor ligand	misc. channels	voltage-dependent na channel inhibitor	farnesylation inhibitor
ppar ligand	0.93
BADGE - PPAR ligand_0.118	0.85				adp ribose polymerase inhibitor	vitamin d receptor ligand	bioactive lipid	prostaglandin	pka activator	paf receptor ligand	cannabinoid receptor ligand	voltage-dependent na channel inhibitor	potassium channels
BADGE - PPAR ligand_14.7	0.92				fo atp synthase inhibitor	protease inhibitor	kinase inhibitor	nos inhibitor	ap-1 inhibitor	inhibits mitochondrial permeability pore opening	ppar ligand	phosphodiesterase inhibitor	bcl-2 ligand
BADGE - PPAR ligand_2.94	0.96				bnos/nos inhibitor	phosphodiesterase inhibitor	inhibits mitochondrial permeability pore opening	ppar ligand	misc. channels	kinase inhibitor	hif-1 inhibitor	farnesylation inhibitor	eg5 inhibitor
GW-9662 - PPAR ligand_18.1	0.97				hsp-90 inhibitor	microtubule poison	ppar ligand	phosphatase inhibitor	no donor	histone deacetylase inhibitor	nos inhibitor	kinase inhibitor	antioxidant
prolyl cis-trans isomerase inhibitor	1
Cyclosporin A - prolyl cis-trans isomerase inhibitor_4.16	1				prolyl cis-trans isomerase inhibitor	calcineurin inhibitor	calcium channels	protein glycosylation inhibitor	na+ ionophore	mitochondrial uncoupler	vanilloid receptor ligand	ip3 receptor blocker	hif-1 inhibitor
FK-506 - prolyl cis-trans isomerase inhibitor_6.22	1				prolyl cis-trans isomerase inhibitor	calcineurin inhibitor	mitochondrial uncoupler	calcium channels	na+ ionophore	fo atp synthase inhibitor	calmodulin inhibitor	ip3 receptor blocker	hif-1 inhibitor
Rapamycin - prolyl cis-trans isomerase inhibitor_5.47	1				prolyl cis-trans isomerase inhibitor	calcineurin inhibitor	fo atp synthase inhibitor	mitochondrial uncoupler	kinase inhibitor	hif-1 inhibitor	ip3 receptor blocker	calcium channels	phosphodiesterase inhibitor
prostaglandin	0.97
16;16-Dimethyl-prostaglandin E2 - prostaglandin_0.0400	0.96				vitamin d receptor ligand	adp ribose polymerase inhibitor	pka activator	prostaglandin	bioactive lipid	paf receptor ligand	cannabinoid receptor ligand	pkc activator	voltage-dependent na channel inhibitor
8-EPI-prostaglandin F2? - prostaglandin_0.00800	0.96				pka activator	vitamin d receptor ligand	adp ribose polymerase inhibitor	prostaglandin	bioactive lipid	paf receptor ligand	cannabinoid receptor ligand	pkc activator	potassium channels
Prostaglandin D2 - prostaglandin_1.00	1				prostaglandin	voltage-dependent na channel inhibitor	bioactive lipid	cannabinoid receptor ligand	ppar ligand	paf receptor ligand	potassium channels	misc. channels	farnesylation inhibitor
protease inhibitor	0.9
3;4-Dichloroisocoumarin - protease inhibitor_4.65	0.55				dopamine antagonist	guanylate cyclase inhibitor	calcium ionophore	activates heterotrimeriuc gtpases	pin1 inhibitor	lipoxygenase inhibitor	calmodulin inhibitor	induces intracellular acidification	no donor
3;4-Dichloroisocoumarin - protease inhibitor_23.3	0.6				nfkappab inhibitor	dopamine antagonist	activates heterotrimeriuc gtpases	inhibitor of mitochondrial na+ca+2 exchange	actin poison	no donor	calmodulin inhibitor	calcium ionophore	pin1 inhibitor
Pepstatin - protease inhibitor_0.0583	0.74				steroid hormone	misc. channels	inhibits mitochondrial permeability pore opening	ap-1 inhibitor	ppar ligand	eg5 inhibitor	hif-1 inhibitor	fo atp synthase inhibitor	kinase inhibitor
MDL-28170 - protease inhibitor_13.1	0.84				ppar ligand	eg5 inhibitor	kinase inhibitor	calcium channels	vanilloid receptor ligand	ap-1 inhibitor	inhibits mitochondrial permeability pore opening	calcineurin inhibitor	phosphodiesterase inhibitor
Shikonin - protease inhibitor_3.47	0.84				no donor	inhibitor of mitochondrial na+ca+2 exchange	microtubule poison	calcium channels	antioxidant	vanilloid receptor ligand	phosphatase inhibitor	guanylate cyclase inhibitor	induces intracellular acidification
Calpeptin - protease inhibitor_13.8	0.88				hsp-90 inhibitor	calcium channels	ppar ligand	vanilloid receptor ligand	phosphatase inhibitor	kinase inhibitor	microtubule poison	eg5 inhibitor	antioxidant
NapSul-Ile-Trp-CHO - protease inhibitor_10.2	0.88				inhibitor of mitochondrial na+ca+2 exchange	lipoxygenase inhibitor	calmodulin inhibitor	induces intracellular acidification	calcium channels	fatty acid biosynthesis inhibitor	antioxidant	mitochondrial uncoupler	dopamine antagonist
CA-074-Me - protease inhibitor_12.6	0.92				hsp-90 inhibitor	ppar ligand	ap-1 inhibitor	phosphodiesterase inhibitor	kinase inhibitor	fo atp synthase inhibitor	protease inhibitor	eg5 inhibitor	nos inhibitor
Z-Leu3-VS - protease inhibitor_0.362	0.93				inhibits dna synthesis	inhibits transcription	iron chelator	inhibits protein synthesis	nos inhibitor	protease inhibitor	sirt1 activator	steroid hormone	na+k+atpase inhibitor
Z-Leu3-VS - protease inhibitor_0.0725	0.95				fo atp synthase inhibitor	kinase inhibitor	inhibits mitochondrial permeability pore opening	ppar ligand	protease inhibitor	phosphodiesterase inhibitor	ap-1 inhibitor	misc. channels	eg5 inhibitor
MG-132 - protease inhibitor_0.421	0.96				inhibits dna synthesis	inhibits transcription	inhibits protein synthesis	protease inhibitor	nos inhibitor	iron chelator	fo atp synthase inhibitor	bcl-2 ligand	sirt1 activator
Tosyl-Phe-CMK (TPCK) - protease inhibitor_2.84	0.97				bcl-2 ligand	dna binding	protease inhibitor	inhibits protein synthesis	lipoxygenase inhibitor	fatty acid biosynthesis inhibitor	kinase inhibitor	fo atp synthase inhibitor	induces intracellular acidification
Z-Leu3-VS - protease inhibitor_1.81	0.97				inhibits dna synthesis	iron chelator	protease inhibitor	fo atp synthase inhibitor	inhibits transcription	inhibits protein synthesis	bcl-2 ligand	sirt1 activator	nos inhibitor
Z-Leu3-VS - protease inhibitor_9.06	0.99				fo atp synthase inhibitor	protease inhibitor	bcl-2 ligand	fatty acid biosynthesis inhibitor	prolyl cis-trans isomerase inhibitor	calcineurin inhibitor	ap-1 inhibitor	kinase inhibitor	inhibits protein synthesis
Ac-Leu-Leu-Nle-CHO - protease inhibitor_13.0	1				protease inhibitor	fo atp synthase inhibitor	bcl-2 ligand	inhibits dna synthesis	nos inhibitor	inhibits protein synthesis	ap-1 inhibitor	histone deacetylase inhibitor	kinase inhibitor
Ac-Leu-Leu-Nle-CHO - protease inhibitor_2.61	1				protease inhibitor	bcl-2 ligand	inhibits protein synthesis	inhibits dna synthesis	fo atp synthase inhibitor	nos inhibitor	iron chelator	ap-1 inhibitor	inhibits transcription
Ala-Ala-Phe-CMK - protease inhibitor_14.7	1				protease inhibitor	fo atp synthase inhibitor	inhibits dna synthesis	nos inhibitor	inhibits protein synthesis	bcl-2 ligand	ap-1 inhibitor	sirt1 activator	kinase inhibitor
MG-132 - protease inhibitor_10.5	1				protease inhibitor	fo atp synthase inhibitor	bcl-2 ligand	ap-1 inhibitor	inhibits protein synthesis	fatty acid biosynthesis inhibitor	mitochondrial uncoupler	nos inhibitor	kinase inhibitor
MG-132 - protease inhibitor_2.10	1				protease inhibitor	bcl-2 ligand	fo atp synthase inhibitor	ikappab kinase inhibitor	ap-1 inhibitor	inhibits protein synthesis	inhibits dna synthesis	histone deacetylase inhibitor	inhibits transcription
protein glycosylation inhibitor	0.99
Tunicamycin - protein glycosylation inhibitor_6.96	0.96				dopamine antagonist	calmodulin inhibitor	actin poison	protein glycosylation inhibitor	activates heterotrimeriuc gtpases	alpha adrenergic agonist	calcium ionophore	antioxidant	na+ ionophore
Tunicamycin - protein glycosylation inhibitor_0.0557	1				protein glycosylation inhibitor	potassium channels	sodium channels	farnesylation inhibitor	misc. channels	phosphodiesterase inhibitor	phospholipase inhibitor	arf gef inhibitor	calcium channels
Tunicamycin - protein glycosylation inhibitor_0.278	1				protein glycosylation inhibitor	arf gef inhibitor	vacuolar atpase inhibitor	na+ ionophore	phosphodiesterase inhibitor	potassium channels	calcium channels	farnesylation inhibitor	phospholipase inhibitor
Tunicamycin - protein glycosylation inhibitor_1.39	1				protein glycosylation inhibitor	na+ ionophore	er ca++ atpase inhibitor	n-wasp inhibitor	estrogen antagonist	prolyl cis-trans isomerase inhibitor	calcineurin inhibitor	calcium channels	ip3 receptor blocker
retinoid receptor ligand	1
13-cis Retinoic acid - retinoid receptor ligand_0.200	1				retinoid receptor ligand	iron chelator	inhibits dna synthesis	nos inhibitor	sirt1 activator	inhibits protein synthesis	ap-1 inhibitor	kinase inhibitor	dhfr inhibitor
sirt1 activator	1
Resveratrol - SIRT1 activator_21.9	1				sirt1 activator	inhibits dna synthesis	iron chelator	fo atp synthase inhibitor	inhibits protein synthesis	inhibits transcription	steroid hormone	kinase inhibitor	protease inhibitor
Resveratrol - SIRT1 activator_4.38	1				sirt1 activator	dhfr inhibitor	iron chelator	steroid hormone	ppar ligand	inhibits dna synthesis	kinase inhibitor	fo atp synthase inhibitor	nos inhibitor
sodium channels	0.88
SDZ-201106 - Sodium channels_10.7	0.81				lipoxygenase inhibitor	guanylate cyclase inhibitor	calcium ionophore	calmodulin inhibitor	induces intracellular acidification	calcium channels	inhibitor of mitochondrial na+ca+2 exchange	antioxidant	dopamine antagonist
Phenamil - Sodium channels_0.654	0.82				vitamin d receptor ligand	adp ribose polymerase inhibitor	prostaglandin	bioactive lipid	pka activator	cannabinoid receptor ligand	paf receptor ligand	voltage-dependent na channel inhibitor	pkc activator
Phenamil - Sodium channels_16.4	0.89				prolyl cis-trans isomerase inhibitor	calcium channels	calcineurin inhibitor	mitochondrial uncoupler	kinase inhibitor	hif-1 inhibitor	vanilloid receptor ligand	phosphodiesterase inhibitor	sodium channels
Procainamide - Sodium channels_4.25	0.99				bnos/nos inhibitor	sodium channels	phosphodiesterase inhibitor	parp inhibitor	misc. channels	farnesylation inhibitor	ppar ligand	inhibits mitochondrial permeability pore opening	potassium channels
sphingosine kinase inhibitor	1
N;N-Dimethylsphingosine - Sphingosine kinase inhibitor_1.00	1				sphingosine kinase inhibitor	n-wasp inhibitor	arf gef inhibitor	myosin ii inhibitor	er ca++ atpase inhibitor	potassium channels	actin poison	calcium ionophore	protein glycosylation inhibitor
steroid hormone	1
Dexamethasone - steroid hormone_0.102	1				steroid hormone	dhfr inhibitor	sirt1 activator	iron chelator	inhibits dna synthesis	inhibits transcription	inhibits protein synthesis	fo atp synthase inhibitor	inhibits mitochondrial permeability pore opening
Dexamethasone - steroid hormone_0.510	1				steroid hormone	dhfr inhibitor	inhibits dna synthesis	sirt1 activator	inhibits transcription	iron chelator	inhibits protein synthesis	fo atp synthase inhibitor	inhibits mitochondrial permeability pore opening
Dexamethasone - steroid hormone_12.7	1				steroid hormone	sirt1 activator	dhfr inhibitor	fo atp synthase inhibitor	iron chelator	inhibits dna synthesis	inhibits mitochondrial permeability pore opening	misc. channels	kinase inhibitor
Dexamethasone - steroid hormone_2.55	1				steroid hormone	iron chelator	sirt1 activator	dhfr inhibitor	inhibits dna synthesis	fo atp synthase inhibitor	inhibits protein synthesis	inhibits mitochondrial permeability pore opening	kinase inhibitor
vacuolar atpase inhibitor	0.93
Bafilomycin A1 - vacuolar ATPase inhibitor_0.803	0.73				lipoxygenase inhibitor	guanylate cyclase inhibitor	induces intracellular acidification	inhibitor of mitochondrial na+ca+2 exchange	calcium channels	calmodulin inhibitor	dna binding	fatty acid biosynthesis inhibitor	mitochondrial uncoupler
Bafilomycin A1 - vacuolar ATPase inhibitor_0.161	0.99				arf gef inhibitor	vacuolar atpase inhibitor	protein glycosylation inhibitor	na+ ionophore	er ca++ atpase inhibitor	calcium ionophore	actin poison	potassium channels	calcium channels
Bafilomycin A1 - vacuolar ATPase inhibitor_0.00642	1				vacuolar atpase inhibitor	arf gef inhibitor	protein glycosylation inhibitor	actin poison	na+ ionophore	calcium ionophore	er ca++ atpase inhibitor	potassium channels	farnesylation inhibitor
Bafilomycin A1 - vacuolar ATPase inhibitor_0.0321	1				vacuolar atpase inhibitor	arf gef inhibitor	protein glycosylation inhibitor	calcium ionophore	actin poison	er ca++ atpase inhibitor	na+ ionophore	farnesylation inhibitor	potassium channels
vanilloid receptor ligand	1
Capsacin(E) - vanilloid receptor ligand_16.4	1				vanilloid receptor ligand	calcium channels	calcium ionophore	lipoxygenase inhibitor	sodium channels	antioxidant	phosphodiesterase inhibitor	kinase inhibitor	mitochondrial uncoupler
Capsazepine - vanilloid receptor ligand_2.65	1				vanilloid receptor ligand	eg5 inhibitor	calcium channels	antioxidant	ip3 receptor blocker	ppar ligand	phosphodiesterase inhibitor	potassium channels	calcineurin inhibitor
vitamin d receptor ligand	1
25-Hydroxyvitamin D3 - Vitamin D receptor ligand_0.00800	1				vitamin d receptor ligand	adp ribose polymerase inhibitor	pka activator	prostaglandin	bioactive lipid	paf receptor ligand	cannabinoid receptor ligand	voltage-dependent na channel inhibitor	pkc activator
voltage-dependent na channel inhibitor	1
Kavain (+/-) - voltage-dependent Na channel inhibitor_4.34	1				voltage-dependent na channel inhibitor	prostaglandin	bioactive lipid	cannabinoid receptor ligand	paf receptor ligand	vitamin d receptor ligand	adp ribose polymerase inhibitor	ppar ligand	misc. channels
