# Supplementary figures and images for: Large-scale cytological profiling for functional analysis of bioactive compounds
Source: Royal Society of Chemistry journal article supplement (doi:10.1039/c3mb70245f), 2013-08-20

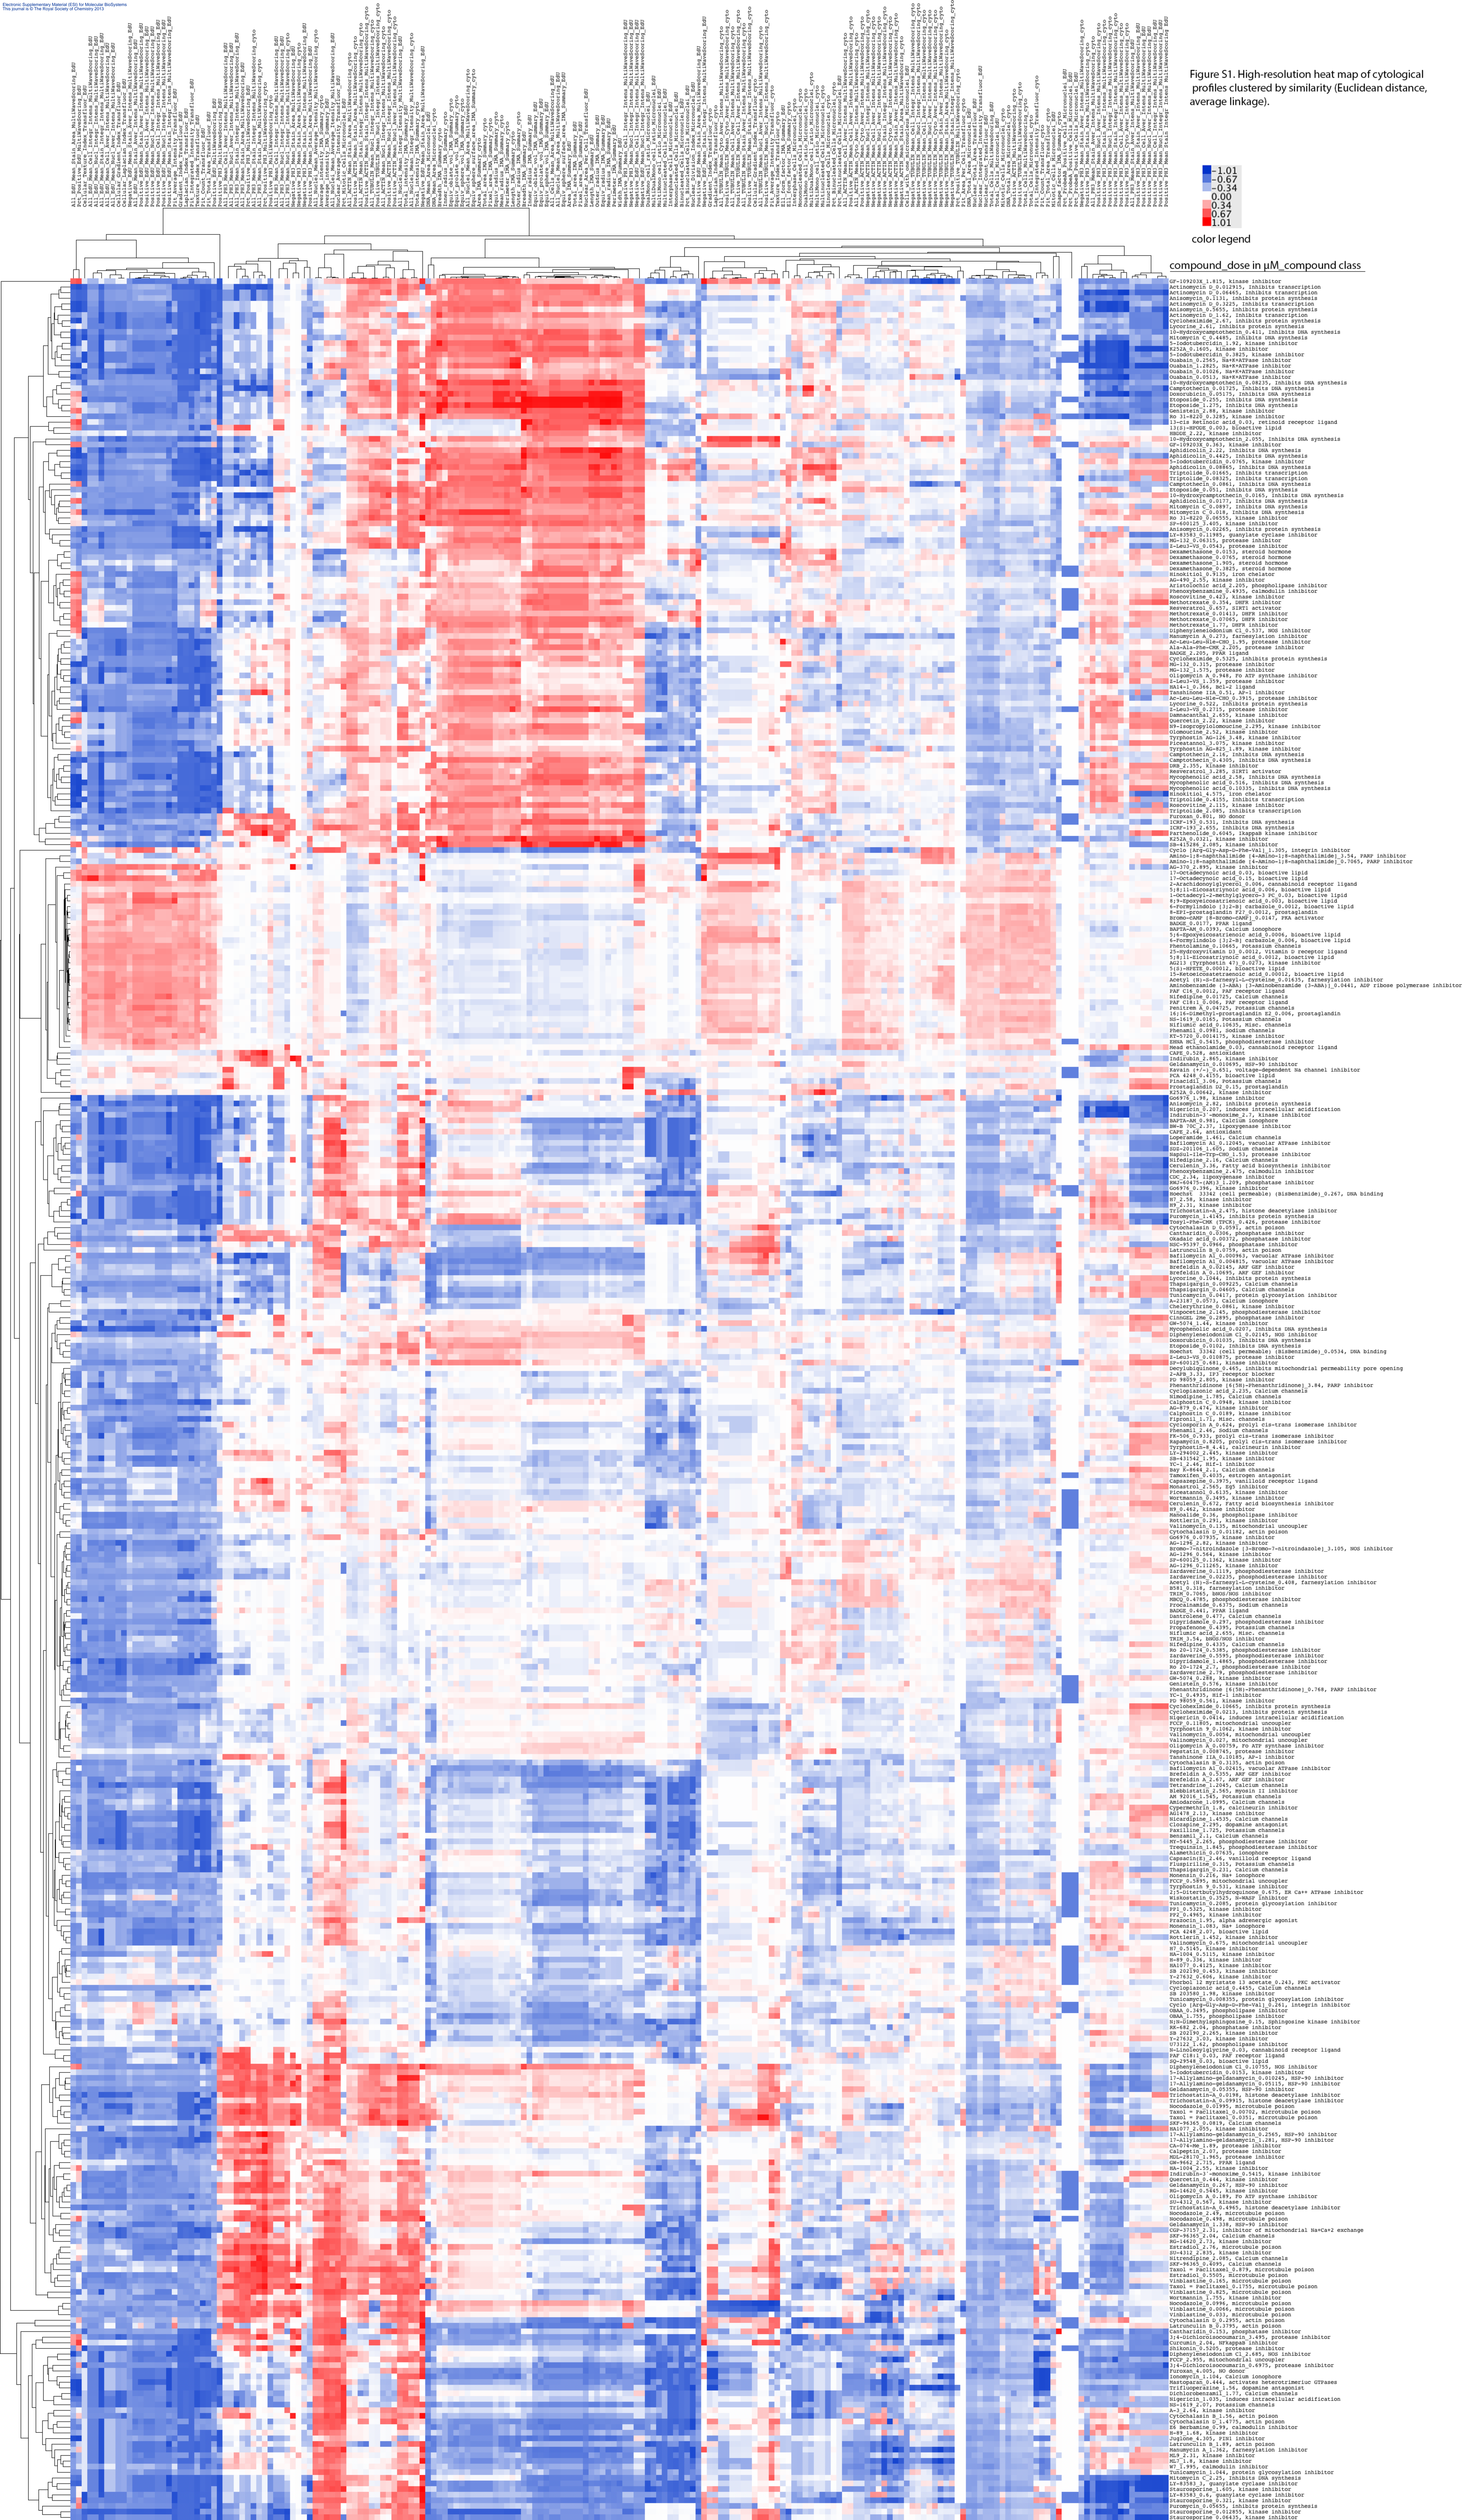

Supplement: c3mb70245f.pdf [file c3mb70245f.pdf]
